# Supplementary material for: The antioxidant effects of butylated hydroxytoluene on cryopreserved goat sperm from a proteomic perspective
Source: PeerJ journal article supplement (doi:10.7717/peerj.17580), 2024-07-05
Supplement: Fifure_S1.pdf [file Fifure_S1.pdf]

***Capra hircus* spermatozoa (n=4)**

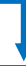

**Cryopreservation in cryo-media contained BHT with different concentrations (0.0 mM, 0.5 mM, 1.0 mM, 2.0 mM )**

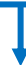

**Evaluation of sperm-quality associated indices**

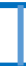

**Motility parameters, ROS levels  
plasma membrane and acrosome integrities**

**Comparative analysis**

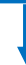

**TMT-based quantitative proteomics  
Parallel reaction monitoring validation**

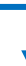

**Bioinformatics analyses**
