# Supplementary material for: The antioxidant effects of butylated hydroxytoluene on cryopreserved goat sperm from a proteomic perspective
Source: PeerJ. 2024 Jul 5;12:e17580. doi: 10.7717/peerj.17580 (PMC11229688; doi:10.7717/peerj.17580)
Supplement: Supplemental Information 3 [file peerj-12-17580-s003.xlsx]

## Sheet: TABLE S1
Protein concentration results of samples using a BCA protein assay kit assay.
Group	Sample volume after extraction (µL)	Protein concentration (µg/µL)
C1	200	6.47
C2	200	6.46
C3	200	5.57
C4	200	5.5
B1	200	7.76
B2	200	7.16
B3	200	5.13
B4	200	3.87

## Sheet: TABLE S2
	Effects of BHT on the quality associated indices of post-thaw goat sperm.
Group	0 mM				0.5 mM				1.0 mM				2.0 mM
Sample	1	2	3	4	1	2	3	4	1	2	3	4	1	2	3	4
TM (%)	56.69	49.95	44.02	61.55	63.21	60.93	60.66	61.92	60.87	53.41	51.81	50.45	58.98	50.51	53.84	44.59
PM (%)	31.97	24.93	26.54	33.43	45.21	35.78	32.67	43.22	39.02	32.53	31.97	32.11	40.54	32.2	28.62	30.71
VCL (μm/s)	73.23	70.95	84.01	89.03	90.33	77.37	72.54	89.77	88.66	81.39	78.75	83.36	86.81	84.94	71.02	86.23
VAP (μm/s)	57.87	54.6	54.23	56.29	64.86	62.3	64.79	67.93	64.85	63.23	53.14	72.31	57.99	52.29	69.41	64.7
VSL (μm/s)	46.06	41.48	52.26	54.34	55.52	52.66	54.22	52.76	54.95	50.18	43.15	58.31	53.46	44.01	43.7	53.64
ALH (μm/s)	2.89	2.56	2.49	3.12	3.17	2.85	2.6	3.24	3.18	2.79	2.37	2.51	2.97	2.97	2.49	2.45
BCF (Hz)	7.09	6.28	6	8.33	8.41	7.33	6.84	7.97	7.76	7.13	6.35	6.63	8.25	7.88	6.36	6.91
PMI (%)	35.052	38.684	40	36.74	51.804	54.25	46	43.143	43.514	43.216	42.25	38.24	39.211	34.3	39.63	45.5
ACRI (%)	41.7	36.7	40.8	39.9	58.7	46.9	47.5	46.6	49.2	33.7	34.5	47.7	45.9	35.7	43	36.8
ROS (%)	39.6	34.2	45.9	47.1	24.7	36.4	35.3	37.7	33.2	37.8	37.6	42	33.5	40.4	40.1	43.5

## Sheet: TABLE S3
					Informations of sperm quantitative proteins using TMT labeling approach.
Accession	Protein Name	Gene symbol	Description	Sum PEP Score	Coverage [%]	# Peptides	# PSMs	# Unique Peptides	# AAs	MW [kDa]	calc. pI	Score Sequest HT	# Peptides	# Razor Peptides	# Protein Groups	C1	C2	C3	C4	B1	B2	B3	B4
A0A452ET62	Fibrous sheath interacting protein 2	FSIP2	Fibrous sheath interacting protein 2 OS=Capra hircus OX=9925 GN=FSIP2 PE=4 SV=1	1642.47	31	209	1070	206	6944	782	6.57	3546.19	209	3	1	6.84914e+09	6.50538e+09	6.93319e+09	5.34368e+09	6.90322e+09	7.72249e+09	7.2711e+09	6.94304e+09
A0A452G671	Dynein axonemal heavy chain 17	DNAH17	Dynein axonemal heavy chain 17 OS=Capra hircus OX=9925 GN=DNAH17 PE=3 SV=1	1333.15	41	179	998	168	4491	512	5.76	3067.27	179	15	1	6.16407e+09	6.83873e+09	6.89318e+09	6.18501e+09	6.48106e+09	6.74433e+09	6.70102e+09	7.44415e+09
A0A452EX84	A-kinase anchoring protein 4	AKAP4	A-kinase anchoring protein 4 OS=Capra hircus OX=9925 GN=AKAP4 PE=3 SV=1	1312.62	74	66	3378	66	848	93.8	6.65	10200.4	66	0	1	8.84222e+10	7.00619e+10	8.24024e+10	5.34906e+10	8.68276e+10	9.33011e+10	9.77971e+10	7.60626e+10
A0A452F4Q5	Dynein axonemal heavy chain 8	DNAH8	Dynein axonemal heavy chain 8 OS=Capra hircus OX=9925 GN=DNAH8 PE=3 SV=1	1150.44	36	173	994	163	4727	540.6	6	3020.47	173	11	1	5.41942e+09	5.772e+09	5.9158e+09	5.38387e+09	5.5707e+09	5.88073e+09	5.75302e+09	6.27398e+09
A0A452E426	Dynein axonemal heavy chain 7	DNAH7	Dynein axonemal heavy chain 7 OS=Capra hircus OX=9925 GN=DNAH7 PE=3 SV=1	838.891	33	136	509	130	4124	472	6.38	1566.91	136	5	1	2.10172e+09	2.24148e+09	2.29462e+09	2.03102e+09	2.21581e+09	2.27882e+09	2.26326e+09	2.40752e+09
A0A452G3M2	A-kinase anchoring protein 3	AKAP3	A-kinase anchoring protein 3 OS=Capra hircus OX=9925 GN=AKAP3 PE=3 SV=1	739.939	66	49	1029	2	860	94.8	6.96	3180.47	49	90	1	1.23473e+10	1.12585e+10	1.2584e+10	9.47761e+09	1.27176e+10	1.36691e+10	1.34864e+10	1.24131e+10
A0A452G3R9	A-kinase anchoring protein 3	AKAP3	A-kinase anchoring protein 3 OS=Capra hircus OX=9925 GN=AKAP3 PE=3 SV=1	728.056	65	48	993	1	851	93.8	7.05	3071.09	48	0	1	1.66888e+08	1.74546e+08	1.59818e+08	1.24802e+08	1.61975e+08	1.52916e+08	1.78374e+08	1.64297e+08
A0A452F048	Dynein axonemal heavy chain 10	DNAH10	Dynein axonemal heavy chain 10 OS=Capra hircus OX=9925 GN=DNAH10 PE=3 SV=1	708.81	32	139	415	138	4569	526	5.81	1242.1	139	0	1	1.47336e+09	1.62471e+09	1.59587e+09	1.48269e+09	1.50546e+09	1.60991e+09	1.55119e+09	1.68022e+09
A0A452DZA2	Outer dense fiber of sperm tails 2	ODF2	Outer dense fiber of sperm tails 2 OS=Capra hircus OX=9925 GN=ODF2 PE=3 SV=1	615.921	49	46	1286	2	829	95.5	7.47	4127.17	46	79	1	1.64474e+10	1.49994e+10	1.59178e+10	1.27364e+10	1.63733e+10	2.08439e+10	1.5661e+10	1.68844e+10
A0A452DZN2	Outer dense fiber of sperm tails 2	ODF2	Outer dense fiber of sperm tails 2 OS=Capra hircus OX=9925 GN=ODF2 PE=3 SV=1	598.666	48	45	1242	1	824	95.4	7.18	3991.23	45	0	1	2.88366e+06	2.74493e+06	3.18997e+06	2.26448e+06	2.75125e+06	3.38987e+06	3.04446e+06	3.17733e+06
A0A452F0D0	Dynein axonemal heavy chain 6	DNAH6	Dynein axonemal heavy chain 6 OS=Capra hircus OX=9925 GN=DNAH6 PE=3 SV=1	593.24	32	108	358	104	3528	403.3	5.63	1120.35	108	1	1	1.31543e+09	1.43915e+09	1.41307e+09	1.28213e+09	1.34847e+09	1.40735e+09	1.37196e+09	1.45936e+09
A0A452F9W5	Dynein axonemal heavy chain 3	DNAH3	Dynein axonemal heavy chain 3 OS=Capra hircus OX=9925 GN=DNAH3 PE=3 SV=1	592.724	27	109	357	105	4076	466.8	5.88	1078.24	109	1	1	1.30521e+09	1.48109e+09	1.42338e+09	1.30054e+09	1.34164e+09	1.43845e+09	1.39665e+09	1.50987e+09
A0A452DZF5	Outer dense fiber of sperm tails 2	ODF2	Outer dense fiber of sperm tails 2 OS=Capra hircus OX=9925 GN=ODF2 PE=3 SV=1	579.462	52	41	1205	1	688	79.1	5.82	3888.97	41	0	1	1.12302e+07	1.30723e+07	1.11702e+07	7.8263e+06	9.94943e+06	1.09141e+07	1.02983e+07	9.87708e+06
A0A452EGB0	Dynein axonemal heavy chain 1	DNAH1	Dynein axonemal heavy chain 1 OS=Capra hircus OX=9925 GN=DNAH1 PE=3 SV=1	549.366	25	108	390	105	4358	496.3	5.88	1121.69	108	0	1	1.72865e+09	1.84086e+09	1.87242e+09	1.67146e+09	1.78454e+09	1.91691e+09	1.82846e+09	1.95833e+09
A0A452F4R1	Dynein axonemal heavy chain 2	DNAH2	Dynein axonemal heavy chain 2 OS=Capra hircus OX=9925 GN=DNAH2 PE=3 SV=1	545.119	26	113	347	111	4370	501.6	6.33	1041.44	113	1	1	1.12028e+09	1.182e+09	1.205e+09	1.07149e+09	1.11875e+09	1.22472e+09	1.16464e+09	1.27462e+09
A0A452FM11	Tubulin beta chain	TUBB4B	Tubulin beta chain OS=Capra hircus OX=9925 GN=TUBB4B PE=3 SV=1	535.294	66	23	1435	1	446	50	4.86	4227.42	23	60	1	1.51747e+10	1.63376e+10	1.63978e+10	1.47174e+10	1.57794e+10	1.55986e+10	1.71431e+10	1.69988e+10
A0A452DW73	Aconitate hydratase, mitochondrial	ACO2	Aconitate hydratase, mitochondrial OS=Capra hircus OX=9925 GN=ACO2 PE=3 SV=1	528.503	57	35	507	35	780	85.3	7.83	1761.26	35	0	1	3.34376e+09	3.72253e+09	3.57858e+09	3.27556e+09	3.43353e+09	3.50006e+09	3.69005e+09	3.77124e+09
A0A452F7S9	Tubulin alpha chain	TUBA3D	Tubulin alpha chain OS=Capra hircus OX=9925 GN=TUBA3D PE=3 SV=1	509.065	61	23	1149	5	470	51.9	5.11	3833.19	23	39	1	2.18195e+10	2.22941e+10	2.37772e+10	2.11029e+10	2.21425e+10	2.24569e+10	2.40994e+10	2.35805e+10
A0A452E573	ATP synthase subunit beta	ATP5F1B	ATP synthase subunit beta OS=Capra hircus OX=9925 GN=ATP5F1B PE=3 SV=1	500.957	65	23	480	23	528	56.1	5.27	1646.23	23	0	1	3.94751e+09	4.27957e+09	4.04031e+09	3.77646e+09	3.97927e+09	3.37589e+09	4.0224e+09	3.87876e+09
A0A452DQX3	Protein piccolo-like	LOC102177288	Protein piccolo-like OS=Capra hircus OX=9925 GN=LOC102177288 PE=3 SV=1	482.07	58	50	298	50	1204	129.1	6.87	1035.63	50	0	1	1.76296e+09	1.18196e+09	1.41851e+09	9.91004e+08	1.60684e+09	1.51065e+09	1.90172e+09	1.24366e+09
A0A452F2I4			Uncharacterized protein OS=Capra hircus OX=9925 PE=4 SV=1	474.381	33	62	483	62	2026	230.5	8.97	1456.12	62	0	1	2.59141e+09	2.43802e+09	2.72193e+09	1.93092e+09	2.70593e+09	2.97311e+09	2.8105e+09	2.63243e+09
A0A452DVV1	Cysteinylglycine-S-conjugate dipeptidase	LAP3	Cysteinylglycine-S-conjugate dipeptidase OS=Capra hircus OX=9925 GN=LAP3 PE=3 SV=1	451.911	69	32	389	32	519	56.2	6.48	1267.25	32	0	1	2.06959e+09	2.21415e+09	2.24179e+09	2.06592e+09	2.09207e+09	2.19637e+09	2.3011e+09	2.37101e+09
A0A452G871	Cytosolic 5'-nucleotidase 1B	LOC102177447	Cytosolic 5'-nucleotidase 1B OS=Capra hircus OX=9925 GN=LOC102177447 PE=4 SV=1	442.442	66	35	486	35	617	70.1	8.85	1532.43	35	0	1	4.97679e+09	5.0795e+09	5.11593e+09	4.70316e+09	5.07712e+09	5.03478e+09	5.3949e+09	5.27029e+09
A0A452DQM6	60 kDa chaperonin	HSPD1	60 kDa chaperonin OS=Capra hircus OX=9925 GN=HSPD1 PE=3 SV=1	434.257	72	36	246	36	573	60.9	5.87	831.02	36	0	1	1.68825e+09	1.80447e+09	1.79285e+09	1.74126e+09	1.75637e+09	1.59687e+09	1.7891e+09	1.76192e+09
A0A452EC76	Zonadhesin	ZAN	Zonadhesin OS=Capra hircus OX=9925 GN=ZAN PE=4 SV=1	422.469	24	47	353	47	2493	272.6	7.06	1131.53	47	0	1	1.82381e+09	1.88255e+09	1.81443e+09	1.69496e+09	1.85439e+09	1.71419e+09	1.8497e+09	1.84529e+09
A0A452FQ66	Enoyl-CoA hydratase	HADHA	Enoyl-CoA hydratase OS=Capra hircus OX=9925 GN=HADHA PE=3 SV=1	414.344	55	37	330	37	753	82.4	9.04	1037.32	37	0	1	2.30644e+09	2.50688e+09	2.53748e+09	2.28085e+09	2.29713e+09	2.38881e+09	2.59967e+09	2.7145e+09
A0A452EU55	2-phospho-D-glycerate hydro-lyase	ENO1	2-phospho-D-glycerate hydro-lyase OS=Capra hircus OX=9925 GN=ENO1 PE=3 SV=1	412.971	72	24	611	18	434	47.3	6.58	1868.4	24	11	1	4.54926e+09	4.51013e+09	4.54492e+09	4.09037e+09	4.81195e+09	4.70198e+09	4.30761e+09	4.45829e+09
A0A452EGY9	Fructose-bisphosphate aldolase	ALDOA	Fructose-bisphosphate aldolase OS=Capra hircus OX=9925 GN=ALDOA PE=3 SV=1	408.657	65	26	807	21	416	45.1	8.28	2637.6	26	5	1	1.02903e+10	1.0466e+10	1.09327e+10	9.12118e+09	1.06548e+10	1.08229e+10	1.15472e+10	1.12391e+10
A0A452G3J7	Tubulin beta chain	TUBB2A	Tubulin beta chain OS=Capra hircus OX=9925 GN=TUBB2A PE=3 SV=1	404.27	58	21	1016	2	445	49.9	4.89	2956.65	21	3	1	3.19497e+07	4.33734e+07	3.32194e+07	3.1827e+07	3.49477e+07	3.53523e+07	3.41368e+07	3.53634e+07
A0A452DTF2	Oxoglutarate dehydrogenase (succinyl-transferring)	OGDH	Oxoglutarate dehydrogenase (succinyl-transferring) OS=Capra hircus OX=9925 GN=OGDH PE=3 SV=1	403.544	41	40	290	40	1023	115.9	6.8	959.64	40	0	1	1.42895e+09	1.43684e+09	1.49497e+09	1.46004e+09	1.40898e+09	1.57898e+09	1.51158e+09	1.5968e+09
A0A452EFQ1	Tektin	TEKT3	Tektin OS=Capra hircus OX=9925 GN=TEKT3 PE=3 SV=1	400.845	61	31	507	31	490	56.6	6.99	1562.37	31	0	1	3.3254e+09	3.57063e+09	3.81321e+09	3.20271e+09	3.50449e+09	3.66157e+09	3.81244e+09	3.9947e+09
A0A452EU77	Pyruvate kinase	PKM	Pyruvate kinase OS=Capra hircus OX=9925 GN=PKM PE=3 SV=1	397.008	67	35	485	2	531	57.9	7.69	1543.02	35	0	1	2.1702e+07	2.41909e+07	2.09008e+07	1.80022e+07	2.23424e+07	2.16791e+07	2.14585e+07	2.13306e+07
A0A452FZ51	Sodium/potassium-transporting ATPase subunit alpha	ATP1A4	Sodium/potassium-transporting ATPase subunit alpha OS=Capra hircus OX=9925 GN=ATP1A4 PE=3 SV=1	396.387	40	38	271	29	1033	113.7	6.7	863.97	38	13	1	1.69443e+09	1.7571e+09	1.69365e+09	1.49382e+09	1.73428e+09	1.74619e+09	1.72805e+09	1.75284e+09
A0A452FRC9		HSPA1L	Uncharacterized protein OS=Capra hircus OX=9925 GN=HSPA1L PE=3 SV=1	391.299	56	33	388	10	642	70.7	6.06	1251.44	33	37	1	2.27652e+09	2.358e+09	2.26956e+09	2.02233e+09	2.33384e+09	2.1547e+09	2.35273e+09	2.37457e+09
A0A452DNG3	Tubulin alpha chain	TUBA4A	Tubulin alpha chain OS=Capra hircus OX=9925 GN=TUBA4A PE=3 SV=1	390.109	44	16	731	2	455	50.7	5.06	2525.34	16	0	1	2.51799e+07	2.61977e+07	2.68624e+07	3.04693e+07	2.84188e+07	2.57299e+07	2.65309e+07	2.86107e+07
A0A452G7N8	HYDIN axonemal central pair apparatus protein	HYDIN	HYDIN axonemal central pair apparatus protein OS=Capra hircus OX=9925 GN=HYDIN PE=4 SV=1	383.767	17	81	208	81	5098	573.3	6.7	603.68	81	0	1	8.38673e+08	8.53684e+08	8.62037e+08	8.0651e+08	7.65559e+08	8.47173e+08	8.41794e+08	8.94002e+08
A0A452FFB0			Uncharacterized protein OS=Capra hircus OX=9925 PE=4 SV=1	383.265	13	82	214	80	6382	717	6.25	623.28	82	0	1	8.93514e+08	8.87993e+08	8.99585e+08	7.09947e+08	8.93024e+08	9.81038e+08	9.14727e+08	8.94952e+08
A0A452ET82	Pyruvate kinase	PKM	Pyruvate kinase OS=Capra hircus OX=9925 GN=PKM PE=3 SV=1	382.684	63	36	522	3	531	58.1	7.53	1611.99	36	48	1	3.44214e+09	3.6112e+09	3.57605e+09	3.15623e+09	3.56401e+09	3.57286e+09	3.66611e+09	3.77158e+09
A0A452FPW7	Dynein axonemal heavy chain 12	DNAH12	Dynein axonemal heavy chain 12 OS=Capra hircus OX=9925 GN=DNAH12 PE=3 SV=1	376.389	27	82	229	77	3043	350.6	6.29	675.76	82	0	1	7.49285e+08	8.65883e+08	8.17257e+08	7.47338e+08	8.14404e+08	8.48453e+08	8.0643e+08	8.63886e+08
A0A452G119	Tubulin alpha chain	TUBA1C	Tubulin alpha chain OS=Capra hircus OX=9925 GN=TUBA1C PE=3 SV=1	372.822	50	17	827	3	449	49.8	5.1	2834.31	17	1	1	2.67064e+07	2.4391e+07	2.61182e+07	3.46364e+07	2.87352e+07	3.01939e+07	2.57115e+07	2.34891e+07
A0A452DNA3	Coiled-coil domain containing 136	CCDC136	Coiled-coil domain containing 136 OS=Capra hircus OX=9925 GN=CCDC136 PE=4 SV=1	367.438	43	48	322	48	1130	130.8	4.82	992.41	48	0	1	1.57664e+09	1.60944e+09	1.58273e+09	1.36192e+09	1.641e+09	1.74005e+09	1.65148e+09	1.62293e+09
J9QIW8	Heat shock 70kDa protein 2	hspA2	Heat shock 70kDa protein 2 OS=Capra hircus OX=9925 GN=hspA2 PE=2 SV=1	362.973	57	38	332	25	636	69.8	5.67	1077.36	38	19	1	2.57792e+09	2.64223e+09	2.47516e+09	2.35126e+09	2.61401e+09	2.47666e+09	2.52454e+09	2.45549e+09
A0A452DPV3	Phosphoglycerate kinase	PGK2	Phosphoglycerate kinase OS=Capra hircus OX=9925 GN=PGK2 PE=3 SV=1	361.868	74	29	373	21	417	44.7	8.4	1114.33	29	13	1	3.31348e+09	3.28418e+09	3.56926e+09	3.20057e+09	3.50739e+09	3.42737e+09	3.84144e+09	3.86412e+09
A0A452E1T9	Calicin	CCIN	Calicin OS=Capra hircus OX=9925 GN=CCIN PE=4 SV=1	361.156	51	30	546	30	588	66.8	8.21	1505.82	30	0	1	6.13041e+09	5.89685e+09	6.27442e+09	4.9174e+09	6.04049e+09	5.73435e+09	6.89135e+09	6.35205e+09
A0A452FKK9	EF-hand calcium binding domain 6	EFCAB6	EF-hand calcium binding domain 6 OS=Capra hircus OX=9925 GN=EFCAB6 PE=4 SV=1	358.434	36	48	246	48	1494	171.8	8.6	763.4	48	0	1	7.63183e+08	8.69296e+08	8.25482e+08	7.72829e+08	8.0128e+08	8.16231e+08	8.02523e+08	8.48673e+08
A0A452ESC5	Cylicin 1	CYLC1	Cylicin 1 OS=Capra hircus OX=9925 GN=CYLC1 PE=4 SV=1	358.4	36	32	496	32	559	62.1	9.54	1903.92	32	0	1	5.21521e+09	6.00492e+09	5.34276e+09	4.50952e+09	5.39105e+09	4.59044e+09	4.85656e+09	4.69215e+09
A0A452G0D5	Uncharacterized LOC102184370	LOC102184370	Uncharacterized LOC102184370 OS=Capra hircus OX=9925 GN=LOC102184370 PE=3 SV=1	356.687	66	31	449	31	520	56.3	7.06	1388.63	31	0	1	3.16263e+09	2.86556e+09	3.18571e+09	2.50036e+09	3.22397e+09	3.27976e+09	3.3752e+09	3.12584e+09
A0A452E0Z2	Glyceraldehyde-3-phosphate dehydrogenase	GAPDHS	Glyceraldehyde-3-phosphate dehydrogenase OS=Capra hircus OX=9925 GN=GAPDHS PE=3 SV=1	348.866	69	22	704	20	385	41.9	7.97	2393.37	22	3	1	6.31707e+09	6.5023e+09	6.6875e+09	5.85829e+09	6.21437e+09	6.33486e+09	6.92241e+09	6.87368e+09
A0A452G3S8	Tubulin beta chain	TUBB	Tubulin beta chain OS=Capra hircus OX=9925 GN=TUBB PE=3 SV=1	343.354	54	19	932	1	444	49.6	4.89	2629.59	19	0	1	1.21195e+07	1.25626e+07	1.11503e+07	1.02769e+07	7.64314e+06	1.26021e+07	1.18186e+07	1.22996e+07
A0A452FIF4	Tektin	TEKT5	Tektin OS=Capra hircus OX=9925 GN=TEKT5 PE=3 SV=1	339.615	66	35	640	35	489	56.5	7.78	1880.52	35	0	1	5.57413e+09	6.39662e+09	6.63845e+09	5.8471e+09	5.80437e+09	6.36448e+09	6.52419e+09	7.36458e+09
A0A452EK10	Interleukin 4 induced 1	IL4I1	Interleukin 4 induced 1 OS=Capra hircus OX=9925 GN=IL4I1 PE=4 SV=1	338.653	60	32	555	32	557	62.2	9.66	1654.94	32	0	1	6.52423e+09	6.85852e+09	6.84517e+09	6.58614e+09	6.65137e+09	6.01898e+09	6.9089e+09	6.98163e+09
A0A452F9E7	Cilia- and flagella-associated protein 43	CFAP43	Cilia- and flagella-associated protein 43 OS=Capra hircus OX=9925 GN=CFAP43 PE=3 SV=1	337.684	33	51	153	51	1650	190.9	6	468.46	51	0	1	5.67169e+08	6.08707e+08	5.99372e+08	5.36319e+08	5.70478e+08	5.91722e+08	5.92869e+08	6.16478e+08
A0A452DLU0	Hexokinase	HK1	Hexokinase OS=Capra hircus OX=9925 GN=HK1 PE=3 SV=1	333.082	43	38	455	36	945	105	6.9	1391.11	38	2	1	4.70875e+09	4.89991e+09	5.18395e+09	4.53751e+09	4.993e+09	5.21532e+09	5.34941e+09	5.41959e+09
A0A452E0A7	Glutathione S-transferase	GSTM3	Glutathione S-transferase OS=Capra hircus OX=9925 GN=GSTM3 PE=3 SV=1	329.014	80	22	538	19	225	26.8	7.24	1556.75	22	5	1	6.31406e+09	5.38297e+09	6.41151e+09	4.94635e+09	6.45127e+09	6.14205e+09	7.10776e+09	5.97812e+09
A0A452ET55	Triosephosphate isomerase	TPI1	Triosephosphate isomerase OS=Capra hircus OX=9925 GN=TPI1 PE=3 SV=1	328.304	80	20	250	20	295	31.5	5.97	895.36	20	0	1	2.19751e+09	2.16989e+09	2.3083e+09	2.08101e+09	2.28809e+09	2.22538e+09	2.39542e+09	2.34395e+09
A0A452FD09	Tubulin beta chain	TUBB4A	Tubulin beta chain OS=Capra hircus OX=9925 GN=TUBB4A PE=3 SV=1	326.159	54	17	853	1	444	49.6	4.88	2295	17	0	1	314850	371018	376634	310124	371885	353615	384506	381946
A0A452EN82	ATP synthase subunit alpha	ATP5F1A	ATP synthase subunit alpha OS=Capra hircus OX=9925 GN=ATP5F1A PE=3 SV=1	322.824	51	28	780	17	560	60.8	9.14	2359.09	28	18	1	9.38786e+09	1.00859e+10	9.99227e+09	9.6897e+09	9.71972e+09	8.68645e+09	1.00904e+10	1.02341e+10
A0A452DRC9	EF-hand domain containing 2	EFHC2	EF-hand domain containing 2 OS=Capra hircus OX=9925 GN=EFHC2 PE=4 SV=1	318.465	56	40	244	40	752	87.8	7.08	752.94	40	0	1	1.37016e+09	1.45907e+09	1.52892e+09	1.29006e+09	1.41937e+09	1.4775e+09	1.59207e+09	1.66433e+09
A0A452DLX8			Uncharacterized protein OS=Capra hircus OX=9925 PE=4 SV=1	318.219	23	35	316	7	1507	166.8	8.16	970.53	35	44	1	1.44811e+09	1.31364e+09	1.34574e+09	1.11436e+09	1.45998e+09	1.43864e+09	1.52492e+09	1.26374e+09
A0A452FRY4	Acrosin	ACR	Acrosin OS=Capra hircus OX=9925 GN=ACR PE=3 SV=1	317.834	45	16	692	16	416	45.7	9.47	2361.5	16	0	1	1.15587e+10	1.13654e+10	1.1657e+10	1.12692e+10	1.17751e+10	1.12898e+10	1.11765e+10	1.15881e+10
A0A452EC53	Succinyl-CoA:3-ketoacid-coenzyme A transferase	LOC108633171	Succinyl-CoA:3-ketoacid-coenzyme A transferase OS=Capra hircus OX=9925 GN=LOC108633171 PE=3 SV=1	313.14	53	21	266	20	500	54.1	8.07	815.72	21	2	1	3.11344e+09	3.21724e+09	3.16144e+09	2.97296e+09	3.22685e+09	3.11078e+09	3.31312e+09	3.38719e+09
A0A452G8X5			Uncharacterized protein OS=Capra hircus OX=9925 PE=4 SV=1	306.844	24	34	306	6	1523	168.4	8.07	947.88	34	0	1	1.167e+08	1.06252e+08	1.04303e+08	8.49706e+07	1.133e+08	1.09454e+08	1.22938e+08	1.02076e+08
A0A452FBM2	75 kDa glucose-regulated protein	HSPA9	75 kDa glucose-regulated protein OS=Capra hircus OX=9925 GN=HSPA9 PE=3 SV=1	306.408	52	35	236	34	679	73.7	6.3	782.56	35	0	1	1.2236e+09	1.27849e+09	1.23391e+09	1.1274e+09	1.23541e+09	1.22597e+09	1.24445e+09	1.21959e+09
A0A452G2D9	Acyl-CoA dehydrogenase very long chain	ACADVL	Acyl-CoA dehydrogenase very long chain OS=Capra hircus OX=9925 GN=ACADVL PE=3 SV=1	306.386	49	30	305	30	655	70.6	8.76	953.81	30	0	1	2.24549e+09	2.43857e+09	2.4117e+09	2.15841e+09	2.30543e+09	2.29356e+09	2.45742e+09	2.45745e+09
A0A452EPE2	NADH-ubiquinone oxidoreductase 75 kDa subunit, mitochondrial	NDUFS1	NADH-ubiquinone oxidoreductase 75 kDa subunit, mitochondrial OS=Capra hircus OX=9925 GN=NDUFS1 PE=3 SV=1	304.214	46	28	174	28	727	79.3	6.27	600.07	28	0	1	8.66148e+08	9.08717e+08	9.21504e+08	7.98095e+08	8.67085e+08	9.55412e+08	9.46805e+08	9.64033e+08
A0A452G1S0	ATP-dependent 6-phosphofructokinase	PFKP	ATP-dependent 6-phosphofructokinase OS=Capra hircus OX=9925 GN=PFKP PE=3 SV=1	302.449	45	32	213	30	791	85.9	6.9	658.53	32	2	1	9.44478e+08	1.00249e+09	1.04292e+09	9.22238e+08	9.80137e+08	1.01529e+09	1.06037e+09	1.0779e+09
A0A452F334	Glycerol-3-phosphate dehydrogenase	GPD2	Glycerol-3-phosphate dehydrogenase OS=Capra hircus OX=9925 GN=GPD2 PE=3 SV=1	298.287	50	39	263	39	727	80.8	7.05	805.21	39	0	1	1.92685e+09	2.01538e+09	2.11055e+09	1.75354e+09	2.02866e+09	2.12989e+09	2.19162e+09	2.18558e+09
A0A452G8G9			Uncharacterized protein OS=Capra hircus OX=9925 PE=4 SV=1	293.509	27	42	244	42	1664	185.6	9.09	752.8	42	0	1	1.74492e+09	1.69232e+09	1.83023e+09	1.37553e+09	1.8124e+09	2.03501e+09	1.96267e+09	1.86698e+09
A0A452GAV0	Fibronectin type III domain containing 8	FNDC8	Fibronectin type III domain containing 8 OS=Capra hircus OX=9925 GN=FNDC8 PE=4 SV=1	287.409	53	17	234	17	321	35.2	5.97	711.76	17	0	1	2.34161e+09	2.19199e+09	2.39205e+09	1.84008e+09	2.368e+09	2.48381e+09	2.5764e+09	2.39807e+09
A0A452DXT3	Testis specific 10	TSGA10	Testis specific 10 OS=Capra hircus OX=9925 GN=TSGA10 PE=4 SV=1	287.295	52	40	193	40	690	80.3	5.85	605.77	40	0	1	8.04094e+08	7.80824e+08	7.56954e+08	6.96396e+08	7.94773e+08	1.31693e+09	7.66065e+08	7.56557e+08
A0A452E876	Acrosin-binding protein	ACRBP	Acrosin-binding protein OS=Capra hircus OX=9925 GN=ACRBP PE=4 SV=1	286.408	50	21	383	21	517	58.7	5.06	1304.78	21	0	1	2.8933e+09	2.65547e+09	2.56059e+09	2.67967e+09	2.73091e+09	2.56222e+09	2.44018e+09	2.34446e+09
A0A452DPQ1	Fumarate hydratase, mitochondrial	FH	Fumarate hydratase, mitochondrial OS=Capra hircus OX=9925 GN=FH PE=3 SV=1	282.21	55	21	207	21	514	55.1	8.06	681.71	21	0	1	1.55447e+09	1.60073e+09	1.62937e+09	1.43717e+09	1.58727e+09	1.53936e+09	1.65482e+09	1.63874e+09
A0A452G707	MICOS complex subunit MIC60	IMMT	MICOS complex subunit MIC60 OS=Capra hircus OX=9925 GN=IMMT PE=3 SV=1	280.988	50	38	217	38	813	89.1	7.02	678.6	38	0	1	1.09819e+09	1.14245e+09	1.1242e+09	1.06994e+09	1.13267e+09	1.09842e+09	1.1121e+09	1.13376e+09
A0A452FLH3	Proton-translocating NAD(P)(+) transhydrogenase	NNT	Proton-translocating NAD(P)(+) transhydrogenase OS=Capra hircus OX=9925 GN=NNT PE=3 SV=1	279.237	39	38	193	38	1086	113.8	8.16	611.46	38	0	1	1.05525e+09	1.04371e+09	1.10174e+09	1.04857e+09	1.06116e+09	1.03971e+09	1.16067e+09	1.1668e+09
A0A452E4Y9	Glycerol kinase	GK2	Glycerol kinase OS=Capra hircus OX=9925 GN=GK2 PE=3 SV=1	278.948	53	23	414	14	554	60.8	5.88	1266.89	23	2	1	1.68843e+09	1.80462e+09	1.8032e+09	1.51598e+09	1.76581e+09	1.74237e+09	1.8562e+09	1.85301e+09
A0A452EPB5	Dynein axonemal intermediate chain 1	DNAI1	Dynein axonemal intermediate chain 1 OS=Capra hircus OX=9925 GN=DNAI1 PE=4 SV=1	278.043	40	26	167	26	701	79.7	6.65	531.51	26	0	1	8.08044e+08	8.36583e+08	8.50634e+08	7.75295e+08	8.17796e+08	8.2613e+08	8.6079e+08	8.67254e+08
A0A452ETM6	Cilia and flagella associated protein 57	CFAP57	Cilia and flagella associated protein 57 OS=Capra hircus OX=9925 GN=CFAP57 PE=4 SV=1	277.167	38	47	168	47	1248	144.7	5.86	509.52	47	0	1	7.88393e+08	8.5339e+08	8.37267e+08	7.84436e+08	8.16111e+08	8.3506e+08	8.1545e+08	8.59192e+08
A0A452FRG1	Tubulin alpha chain	TUBA8	Tubulin alpha chain OS=Capra hircus OX=9925 GN=TUBA8 PE=3 SV=1	274.231	40	15	622	6	493	54.7	5.06	2165.56	15	0	1	9.8645e+07	1.04825e+08	1.03689e+08	9.02545e+07	1.05993e+08	1.02944e+08	1.11111e+08	1.06571e+08
A0A452FFW1	Voltage-dependent anion-selective channel protein 3	VDAC3	Voltage-dependent anion-selective channel protein 3 OS=Capra hircus OX=9925 GN=VDAC3 PE=3 SV=1	273.706	57	13	669	6	283	30.7	8.78	2038.89	13	11	1	6.5106e+09	6.44494e+09	7.42939e+09	5.12316e+09	6.52158e+09	7.20525e+09	7.67323e+09	7.23983e+09
A0A452FNC0	Saccharopine dehydrogenase (putative)	SCCPDH	Saccharopine dehydrogenase (putative) OS=Capra hircus OX=9925 GN=SCCPDH PE=4 SV=1	272.434	49	14	177	14	429	47.3	9.03	616.58	14	0	1	2.18201e+09	2.37038e+09	2.45408e+09	2.10527e+09	2.31072e+09	2.13939e+09	2.52092e+09	2.46865e+09
A0A452FKE9	Acetyl-coenzyme A synthetase	ACSS1	Acetyl-coenzyme A synthetase OS=Capra hircus OX=9925 GN=ACSS1 PE=3 SV=1	271.678	42	24	205	24	675	74.3	7.02	703.34	24	0	1	1.63195e+09	1.78514e+09	1.77619e+09	1.55135e+09	1.70782e+09	1.71279e+09	1.83488e+09	1.86511e+09
A0A452G875	Family with sequence similarity 71 member B	FAM71B	Family with sequence similarity 71 member B OS=Capra hircus OX=9925 GN=FAM71B PE=4 SV=1	271.125	54	26	413	24	587	62.3	9.76	1247.76	26	3	1	5.40968e+09	4.27261e+09	4.52974e+09	3.55341e+09	4.95708e+09	3.82339e+09	6.23812e+09	3.87044e+09
A0A452DPY5			Uncharacterized protein OS=Capra hircus OX=9925 PE=4 SV=1	270.005	28	42	181	42	1518	168.8	9.25	532.85	42	0	1	8.76089e+08	8.91587e+08	9.38632e+08	7.40298e+08	9.15966e+08	9.89541e+08	9.69362e+08	9.75799e+08
A0A452EB05	Pyruvate dehydrogenase E1 component subunit beta	PDHB	Pyruvate dehydrogenase E1 component subunit beta OS=Capra hircus OX=9925 GN=PDHB PE=4 SV=1	268.959	47	13	258	13	359	39.1	6.65	893.06	13	0	1	1.30469e+09	1.40769e+09	1.39224e+09	1.26996e+09	1.30585e+09	1.28787e+09	1.43935e+09	1.44524e+09
A0A452EGR2	L-lactate dehydrogenase	LDHC	L-lactate dehydrogenase OS=Capra hircus OX=9925 GN=LDHC PE=3 SV=1	268.366	61	23	485	20	332	36.1	8.19	1376.39	23	4	1	7.36664e+09	7.94067e+09	7.7905e+09	7.33021e+09	7.31545e+09	7.14233e+09	7.91654e+09	8.15531e+09
A0A452G940	Tubulin beta chain	TUBB3	Tubulin beta chain OS=Capra hircus OX=9925 GN=TUBB3 PE=3 SV=1	268.267	36	14	595	3	450	50.4	4.93	1640.89	14	0	1	5.86517e+06	6.0622e+06	5.85917e+06	5.86097e+06	6.17359e+06	6.0063e+06	5.55032e+06	5.68642e+06
A0A452ESH4	Glycerol kinase		Glycerol kinase OS=Capra hircus OX=9925 PE=3 SV=1	267.505	50	24	452	10	549	60.1	6.04	1297	24	25	1	7.68402e+09	8.37412e+09	8.37126e+09	7.14599e+09	8.11772e+09	7.88181e+09	8.43378e+09	8.31502e+09
A0A452G1A9	Tubulin beta chain	TUBB6	Tubulin beta chain OS=Capra hircus OX=9925 GN=TUBB6 PE=3 SV=1	266.495	30	13	608	1	446	49.9	4.86	1878.84	13	0	1	894431	1.14957e+06	932207	1.0191e+06	1.03593e+06	1.04935e+06	1.09946e+06	1.03754e+06
A0A452G951	Tektin	TEKT2	Tektin OS=Capra hircus OX=9925 GN=TEKT2 PE=3 SV=1	262.238	67	33	251	33	430	49.9	6.35	815.64	33	0	1	2.03202e+09	2.18572e+09	2.38133e+09	2.24885e+09	2.34694e+09	2.13933e+09	2.29098e+09	2.48132e+09
A0A452F4D5	15S Mg(2+)-ATPase p97 subunit	VCP	15S Mg(2+)-ATPase p97 subunit OS=Capra hircus OX=9925 GN=VCP PE=3 SV=1	260.659	48	34	184	34	816	90.6	5.52	555.2	34	0	1	1.0555e+09	1.082e+09	1.11534e+09	1.05916e+09	1.06843e+09	1.10312e+09	1.13286e+09	1.19186e+09
A0A452EUX8	Acyl-CoA synthetase bubblegum family member 2	ACSBG2	Acyl-CoA synthetase bubblegum family member 2 OS=Capra hircus OX=9925 GN=ACSBG2 PE=4 SV=1	256.561	41	24	135	24	672	75	7.31	482.8	24	0	1	6.6944e+08	7.08054e+08	6.9216e+08	6.22358e+08	6.84617e+08	6.85753e+08	7.45102e+08	7.60253e+08
A0A452ERA9	Tetratricopeptide repeat domain 25	TTC25	Tetratricopeptide repeat domain 25 OS=Capra hircus OX=9925 GN=TTC25 PE=4 SV=1	255.184	41	28	154	28	650	74.8	6.11	473.12	28	0	1	1.05095e+09	1.06286e+09	1.04672e+09	1.06082e+09	1.07064e+09	1.00155e+09	1.02202e+09	1.08046e+09
A0A452F824	Leucine zipper protein 2	LUZP2	Leucine zipper protein 2 OS=Capra hircus OX=9925 GN=LUZP2 PE=4 SV=1	254.096	60	12	654	12	264	30.1	5.78	2137.39	12	0	1	1.63212e+10	9.53934e+09	1.22438e+10	8.09351e+09	1.58737e+10	1.17383e+10	1.50816e+10	1.01693e+10
A0A452EWL1	Cytochrome b-c1 complex subunit 2, mitochondrial	UQCRC2	Cytochrome b-c1 complex subunit 2, mitochondrial OS=Capra hircus OX=9925 GN=UQCRC2 PE=3 SV=1	253.485	60	21	232	21	453	48.1	8.63	799.2	21	0	1	2.25425e+09	2.35362e+09	2.45331e+09	2.20794e+09	2.38227e+09	2.28633e+09	2.48181e+09	2.48965e+09
A0A452FFQ6	Acyl-CoA dehydrogenase family member 9	ACAD9	Acyl-CoA dehydrogenase family member 9 OS=Capra hircus OX=9925 GN=ACAD9 PE=3 SV=1	250.77	51	36	239	36	620	68.1	8.43	737.77	36	0	1	2.08726e+09	2.218e+09	2.30579e+09	2.03467e+09	2.10783e+09	2.16092e+09	2.38117e+09	2.43757e+09
A0A452F2D6	Cylicin_N domain-containing protein		Cylicin_N domain-containing protein OS=Capra hircus OX=9925 PE=4 SV=1	242.334	52	32	326	32	417	46.1	9.64	984.71	32	0	1	6.59044e+09	7.39792e+09	6.45054e+09	5.94816e+09	6.83227e+09	5.35957e+09	6.39388e+09	6.06235e+09
A0A452F194	RAB2B, member RAS oncogene family	RAB2B	RAB2B, member RAS oncogene family OS=Capra hircus OX=9925 GN=RAB2B PE=4 SV=1	241.72	71	14	390	7	216	24.2	7.08	1410.45	14	10	1	3.6242e+09	3.86832e+09	3.69098e+09	3.52944e+09	3.69235e+09	3.23027e+09	3.85234e+09	3.61838e+09
A0A452EGC2	Voltage-dependent anion-selective channel protein 2	VDAC2	Voltage-dependent anion-selective channel protein 2 OS=Capra hircus OX=9925 GN=VDAC2 PE=3 SV=1	237.534	59	14	603	13	288	31	6.74	1944.38	14	1	1	5.37802e+09	5.70081e+09	5.90591e+09	4.28312e+09	5.46565e+09	6.0957e+09	6.11617e+09	5.83591e+09
A0A452EFP3	Sperm equatorial segment protein 1	SPESP1	Sperm equatorial segment protein 1 OS=Capra hircus OX=9925 GN=SPESP1 PE=4 SV=1	235.527	57	18	346	18	364	41.3	6.48	1040.53	18	0	1	6.43786e+09	6.60438e+09	6.3112e+09	5.93618e+09	6.30217e+09	5.397e+09	5.88882e+09	5.84375e+09
A0A452FC89	Hyaluronidase	LOC100860748	Hyaluronidase OS=Capra hircus OX=9925 GN=LOC100860748 PE=3 SV=1	234.384	32	16	481	16	551	61.8	8.66	1311.75	16	0	1	1.07098e+10	1.06318e+10	9.63975e+09	8.82492e+09	1.04962e+10	9.99718e+09	9.94398e+09	9.88089e+09
J9QEX1	Heat shock 70kDa-like protein 1	hspA1L	Heat shock 70kDa-like protein 1 OS=Capra hircus OX=9925 GN=hspA1L PE=2 SV=1	232.952	32	17	216	1	641	70.5	5.71	710.06	17	0	1	790843	1.58807e+06	752079	792401	817181	801456	930193	689068
A0A452G4D6	CCT-beta	CCT2	CCT-beta OS=Capra hircus OX=9925 GN=CCT2 PE=3 SV=1	232.47	53	27	127	27	535	57.4	6.64	400.96	27	0	1	4.98882e+08	5.18764e+08	5.52709e+08	5.3458e+08	5.64419e+08	5.19664e+08	6.16392e+08	6.48077e+08
A0A452EAK6	Succinyl-CoA:3-ketoacid-coenzyme A transferase	OXCT1	Succinyl-CoA:3-ketoacid-coenzyme A transferase OS=Capra hircus OX=9925 GN=OXCT1 PE=3 SV=1	229.893	44	17	158	12	522	56.9	7.66	501.67	17	11	1	1.17056e+09	1.31903e+09	1.22346e+09	1.05342e+09	1.22691e+09	1.1993e+09	1.29659e+09	1.30445e+09
A0A452EGF3	Carboxypeptidase Q	CPQ	Carboxypeptidase Q OS=Capra hircus OX=9925 GN=CPQ PE=4 SV=1	229.506	42	17	508	17	483	52.7	6.09	1503.04	17	0	1	8.11511e+09	8.17507e+09	7.61181e+09	6.80449e+09	8.12534e+09	7.10235e+09	7.96038e+09	7.59526e+09
A0A452EHZ5	ALMS1 centrosome and basal body associated protein	ALMS1	ALMS1 centrosome and basal body associated protein OS=Capra hircus OX=9925 GN=ALMS1 PE=4 SV=1	224.782	16	50	116	50	3764	419.3	6.32	339.61	50	0	1	3.16195e+08	2.71594e+08	2.8905e+08	2.48684e+08	3.03387e+08	3.29552e+08	3.24539e+08	2.63445e+08
A0A452G4K3	ATP-dependent 6-phosphofructokinase	PFKM	ATP-dependent 6-phosphofructokinase OS=Capra hircus OX=9925 GN=PFKM PE=3 SV=1	220.969	38	25	120	23	780	85.5	7.99	414.22	25	0	1	6.36325e+08	6.58373e+08	7.03345e+08	5.85275e+08	6.61408e+08	6.64772e+08	7.19007e+08	7.2859e+08
A0A452FXX0	Malate dehydrogenase	MDH2	Malate dehydrogenase OS=Capra hircus OX=9925 GN=MDH2 PE=3 SV=1	216.879	68	19	224	19	338	35.6	8.54	742.38	19	0	1	4.36099e+09	4.73274e+09	4.89091e+09	4.59093e+09	4.89956e+09	4.24189e+09	4.88576e+09	5.16071e+09
A0A452E7C4	Calmodulin 2	CALM2	Calmodulin 2 OS=Capra hircus OX=9925 GN=CALM2 PE=4 SV=1	216.604	53	11	519	7	145	16.3	4.28	1705.63	11	4	1	1.30172e+10	1.35659e+10	1.17556e+10	9.74311e+09	1.30451e+10	8.72127e+09	1.09888e+10	1.0439e+10
I1W1N0	RAB2A, member RAS oncogene family	RAB2A	RAB2A, member RAS oncogene family OS=Capra hircus OX=9925 GN=RAB2A PE=2 SV=1	215.789	71	13	530	6	212	23.5	6.54	1743.91	13	0	1	5.13554e+09	5.49573e+09	5.33709e+09	5.16292e+09	5.2398e+09	4.38707e+09	5.38475e+09	5.30485e+09
A0A452FH59	Acetyl-CoA acetyltransferase 1	ACAT1	Acetyl-CoA acetyltransferase 1 OS=Capra hircus OX=9925 GN=ACAT1 PE=3 SV=1	212.351	54	18	129	18	409	43.4	8.02	457.16	18	0	1	7.30376e+08	7.58682e+08	7.79249e+08	7.29755e+08	7.51761e+08	7.62917e+08	8.0654e+08	8.11866e+08
F8UN03	Heat shock protein 70.1		Heat shock protein 70.1 OS=Capra hircus OX=9925 PE=2 SV=1	208.985	33	21	211	5	641	70.2	5.82	674.58	21	0	1	1.18944e+07	1.11555e+07	1.11039e+07	1.01243e+07	1.12612e+07	1.12423e+07	1.11606e+07	1.06854e+07
A0A452EW89	cAMP-dependent protein kinase	PRKACA	cAMP-dependent protein kinase OS=Capra hircus OX=9925 GN=PRKACA PE=3 SV=1	208.563	44	15	197	15	350	40.5	7.96	615.61	15	0	1	1.3277e+09	1.3486e+09	1.38707e+09	1.32139e+09	1.48418e+09	1.42973e+09	1.36547e+09	1.45428e+09
A0A452E968	T-complex protein 1 subunit gamma	CCT3	T-complex protein 1 subunit gamma OS=Capra hircus OX=9925 GN=CCT3 PE=3 SV=1	208.001	52	27	113	27	545	60.5	6.8	371.83	27	0	1	5.09029e+08	5.09409e+08	5.56677e+08	5.03136e+08	5.33523e+08	5.64824e+08	6.06902e+08	6.10505e+08
A0A452FAP5	Succinate--CoA ligase [GDP-forming] subunit beta, mitochondrial	SUCLG2	Succinate--CoA ligase [GDP-forming] subunit beta, mitochondrial OS=Capra hircus OX=9925 GN=SUCLG2 PE=3 SV=1	207.212	47	25	194	25	432	46.6	7.62	613.03	25	0	1	1.68518e+09	1.80991e+09	1.71394e+09	1.5424e+09	1.72913e+09	1.67786e+09	1.68705e+09	1.67278e+09
A0A452DWD6	Zona pellucida binding protein	ZPBP	Zona pellucida binding protein OS=Capra hircus OX=9925 GN=ZPBP PE=3 SV=1	206.511	57	16	441	16	350	39.5	8.81	1286.67	16	0	1	4.32148e+09	4.64714e+09	4.66229e+09	4.30031e+09	4.54922e+09	4.46659e+09	4.64236e+09	4.6906e+09
A0A452EKG9	EF-hand domain containing 1	EFHC1	EF-hand domain containing 1 OS=Capra hircus OX=9925 GN=EFHC1 PE=4 SV=1	206.337	59	35	186	35	640	74	5.78	534.9	35	0	1	1.05516e+09	1.14286e+09	1.15807e+09	1.00935e+09	1.09045e+09	1.13053e+09	1.1504e+09	1.19836e+09
A0A452FNG4	Nucleoporin 210 like	NUP210L	Nucleoporin 210 like OS=Capra hircus OX=9925 GN=NUP210L PE=3 SV=1	205.482	20	36	126	36	1860	207.1	7.69	402.89	36	0	1	8.24526e+08	8.44115e+08	8.4559e+08	7.58945e+08	8.28517e+08	8.31646e+08	8.3398e+08	8.70193e+08
A0A452FFV4	Acetyltransferase component of pyruvate dehydrogenase complex	DLAT	Acetyltransferase component of pyruvate dehydrogenase complex OS=Capra hircus OX=9925 GN=DLAT PE=3 SV=1	204.899	38	20	191	20	630	67.3	7.87	664.63	20	0	1	1.37767e+09	1.50295e+09	1.42117e+09	1.35441e+09	1.35097e+09	1.30917e+09	1.44164e+09	1.48169e+09
A0A452G0C2	Hydroxyacyl-CoA dehydrogenase trifunctional multienzyme complex subunit beta	HADHB	Hydroxyacyl-CoA dehydrogenase trifunctional multienzyme complex subunit beta OS=Capra hircus OX=9925 GN=HADHB PE=3 SV=1	204.314	46	20	217	20	474	51.7	9.42	626.05	20	0	1	1.10781e+09	1.21686e+09	1.19724e+09	1.11343e+09	1.15962e+09	1.03176e+09	1.22277e+09	1.21822e+09
A0A452DS73	Armadillo repeat containing 4	ARMC4	Armadillo repeat containing 4 OS=Capra hircus OX=9925 GN=ARMC4 PE=4 SV=1	203.459	34	34	139	34	1045	116	7.23	416.02	34	0	1	8.01831e+08	8.03688e+08	8.48693e+08	7.70864e+08	8.43827e+08	8.26013e+08	8.5817e+08	9.00081e+08
A0A452F2G7	Succinate dehydrogenase [ubiquinone] flavoprotein subunit, mitochondrial	SDHA	Succinate dehydrogenase [ubiquinone] flavoprotein subunit, mitochondrial OS=Capra hircus OX=9925 GN=SDHA PE=3 SV=1	201.117	41	21	165	21	665	72.9	7.27	557.58	21	0	1	7.39645e+08	8.33975e+08	8.11258e+08	7.20051e+08	7.75555e+08	7.95683e+08	8.34487e+08	8.38994e+08
A0A452FMZ7	Heat shock protein 90 alpha family class A member 1	HSP90AA1	Heat shock protein 90 alpha family class A member 1 OS=Capra hircus OX=9925 GN=HSP90AA1 PE=3 SV=1	199.558	31	24	105	14	733	84.7	5.01	346.02	24	12	1	4.1526e+08	4.34259e+08	4.38394e+08	4.45544e+08	4.52012e+08	4.42525e+08	4.75132e+08	4.70957e+08
A0A452DSH1	Coiled-coil domain containing 40	CCDC40	Coiled-coil domain containing 40 OS=Capra hircus OX=9925 GN=CCDC40 PE=4 SV=1	199.49	36	38	107	38	937	108.8	6.6	323.16	38	0	1	3.49198e+08	3.7225e+08	3.66846e+08	3.44944e+08	3.6407e+08	3.69059e+08	3.57561e+08	3.75345e+08
A0A452EMN2	Sperm associated antigen 17	SPAG17	Sperm associated antigen 17 OS=Capra hircus OX=9925 GN=SPAG17 PE=4 SV=1	198.414	20	38	107	38	1890	213.9	6.4	320.16	38	0	1	4.88591e+08	5.21734e+08	5.12165e+08	4.52504e+08	5.03241e+08	5.06656e+08	5.12588e+08	5.26073e+08
A0A452FKJ3	Calcium-transporting ATPase	ATP2B4	Calcium-transporting ATPase OS=Capra hircus OX=9925 GN=ATP2B4 PE=3 SV=1	198.408	24	30	110	30	1216	134.5	5.94	336.1	30	0	1	4.40716e+08	4.69412e+08	4.55662e+08	4.03619e+08	4.62864e+08	4.73463e+08	4.62773e+08	4.63992e+08
A0A452DNE7	Actin-like protein 7A	ACTL7A	Actin-like protein 7A OS=Capra hircus OX=9925 GN=ACTL7A PE=3 SV=1	197.728	47	16	152	16	438	49	7.03	612.78	16	0	1	6.33385e+08	6.38882e+08	6.20395e+08	5.21677e+08	6.33796e+08	6.11177e+08	6.69816e+08	6.06832e+08
A0A452GAE1	Sperm flagellar 2	SPEF2	Sperm flagellar 2 OS=Capra hircus OX=9925 GN=SPEF2 PE=4 SV=1	197.26	23	44	107	44	1745	200	5.55	322.6	44	0	1	4.34642e+08	4.41198e+08	4.37511e+08	4.20557e+08	4.13614e+08	4.45551e+08	4.26484e+08	4.52432e+08
D1MGL8	L-lactate dehydrogenase	LDH-A	L-lactate dehydrogenase OS=Capra hircus OX=9925 GN=LDH-A PE=2 SV=1	197.164	52	18	202	2	332	36.5	8.21	730.54	18	21	1	1.31883e+09	1.41111e+09	1.37357e+09	1.27418e+09	1.35025e+09	1.32342e+09	1.38969e+09	1.40973e+09
A0A452EUU0	Glucose-6-phosphate isomerase	GPI	Glucose-6-phosphate isomerase OS=Capra hircus OX=9925 GN=GPI PE=3 SV=1	196.25	31	17	185	17	557	62.8	7.94	615.51	17	0	1	1.30492e+09	1.31243e+09	1.39126e+09	1.28235e+09	1.35516e+09	1.27975e+09	1.50513e+09	1.49249e+09
A0A452F4M2	L-lactate dehydrogenase	LDH-A	L-lactate dehydrogenase OS=Capra hircus OX=9925 GN=LDH-A PE=3 SV=1	195.768	47	17	201	1	361	39.7	8.37	725.26	17	0	1	5.94159e+07	5.78313e+07	6.35414e+07	5.19542e+07	6.54636e+07	6.38352e+07	6.43481e+07	6.14676e+07
C7EXB8	Glutathione peroxidase (Fragment)	GPx4	Glutathione peroxidase (Fragment) OS=Capra hircus OX=9925 GN=GPx4 PE=2 SV=3	193.352	57	14	806	14	195	22	8.78	2430.2	14	0	1	1.18068e+10	1.21099e+10	1.29576e+10	1.0504e+10	1.19028e+10	1.28934e+10	1.37993e+10	1.33915e+10
A0A452FUX3	Armadillo repeat containing 3	ARMC3	Armadillo repeat containing 3 OS=Capra hircus OX=9925 GN=ARMC3 PE=4 SV=1	192.285	37	30	108	30	871	95.6	6.09	370.18	30	0	1	4.41034e+08	4.5329e+08	4.53795e+08	4.24643e+08	4.36365e+08	4.58089e+08	4.47964e+08	4.6689e+08
A0A452F3U3	CCT-epsilon	CCT5	CCT-epsilon OS=Capra hircus OX=9925 GN=CCT5 PE=3 SV=1	191.785	54	27	143	22	541	59.6	5.91	438.37	27	9	1	5.39316e+08	5.52247e+08	6.03638e+08	5.77831e+08	5.80308e+08	5.686e+08	6.59658e+08	6.83327e+08
A0A452EWS6	Cilia and flagella associated protein 58	CFAP58	Cilia and flagella associated protein 58 OS=Capra hircus OX=9925 GN=CFAP58 PE=4 SV=1	191.737	48	45	123	45	873	103.6	7.78	351.09	45	0	1	4.33464e+08	4.44978e+08	4.58495e+08	4.92758e+08	4.73756e+08	5.08186e+08	4.23136e+08	4.33612e+08
A0A452FSH7	Protein kinase cAMP-dependent type II regulatory subunit alpha	PRKAR2A	Protein kinase cAMP-dependent type II regulatory subunit alpha OS=Capra hircus OX=9925 GN=PRKAR2A PE=3 SV=1	189.302	43	15	197	15	401	45.1	4.93	587.75	15	0	1	2.14067e+09	2.13018e+09	2.16043e+09	1.84855e+09	2.16033e+09	2.23737e+09	2.10855e+09	2.14214e+09
A0A452FCB6	Coiled-coil domain containing 183	CCDC183	Coiled-coil domain containing 183 OS=Capra hircus OX=9925 GN=CCDC183 PE=4 SV=1	188.62	43	28	106	28	537	62.4	9.14	330.66	28	0	1	4.67006e+08	4.70357e+08	5.08318e+08	4.75633e+08	5.09841e+08	5.15684e+08	4.90968e+08	5.32124e+08
A0A452FWC6	Dihydrolipoyl dehydrogenase	DLD	Dihydrolipoyl dehydrogenase OS=Capra hircus OX=9925 GN=DLD PE=3 SV=1	187.418	43	17	201	17	509	54.1	7.68	614.62	17	0	1	1.52383e+09	1.59996e+09	1.59498e+09	1.47901e+09	1.56674e+09	1.57776e+09	1.6862e+09	1.71836e+09
A0A452EEN1	EF-hand domain family member B	EFHB	EF-hand domain family member B OS=Capra hircus OX=9925 GN=EFHB PE=4 SV=1	185.416	38	26	107	26	837	93.4	7.65	334.73	26	0	1	5.22318e+08	5.52709e+08	5.83684e+08	5.15505e+08	5.54712e+08	5.83701e+08	5.62557e+08	6.03129e+08
A0A452F2M4	ADP/ATP translocase	SLC25A31	ADP/ATP translocase OS=Capra hircus OX=9925 GN=SLC25A31 PE=3 SV=1	185.309	55	20	455	18	323	35.7	9.61	1253.17	20	4	1	6.18952e+09	6.87789e+09	6.69134e+09	6.40987e+09	6.62382e+09	5.62788e+09	6.97776e+09	7.02707e+09
A0A452G9P5	Myosin heavy chain 1	MYH1	Myosin heavy chain 1 OS=Capra hircus OX=9925 GN=MYH1 PE=3 SV=1	185.083	23	39	77	2	1939	222.9	5.72	244.23	39	44	1	3.66241e+08	1.30593e+08	1.48163e+08	1.65513e+08	1.27828e+08	1.44486e+08	1.24782e+08	1.30922e+08
A0A452E1U5	Hydroxysteroid dehydrogenase like 2	HSDL2	Hydroxysteroid dehydrogenase like 2 OS=Capra hircus OX=9925 GN=HSDL2 PE=4 SV=1	185.061	61	25	142	25	418	45.1	8.25	440.24	25	0	1	9.74897e+08	1.00126e+09	1.05862e+09	9.47434e+08	1.00725e+09	9.86142e+08	1.07565e+09	1.09531e+09
A0A452EQ11	Cytochrome b-c1 complex subunit 1, mitochondrial	UQCRC1	Cytochrome b-c1 complex subunit 1, mitochondrial OS=Capra hircus OX=9925 GN=UQCRC1 PE=4 SV=1	184.008	36	17	172	16	480	52.8	6.32	543.59	17	1	1	1.74135e+09	1.84858e+09	1.88831e+09	1.67557e+09	1.7836e+09	1.79153e+09	1.97506e+09	2.00077e+09
A0A452EXX0	Cilia and flagella associated protein 45	CFAP45	Cilia and flagella associated protein 45 OS=Capra hircus OX=9925 GN=CFAP45 PE=4 SV=1	183.891	51	34	190	34	549	65.6	9.38	536.27	34	0	1	1.24684e+09	1.31599e+09	1.32577e+09	1.29652e+09	1.26542e+09	1.26539e+09	1.25662e+09	1.34949e+09
A0A452FMD0	Pyruvate carboxylase	PC	Pyruvate carboxylase OS=Capra hircus OX=9925 GN=PC PE=4 SV=1	183.387	26	26	97	26	1187	130.6	6.8	328.27	26	0	1	3.21602e+08	3.4548e+08	3.42056e+08	3.26454e+08	3.38658e+08	3.49782e+08	3.4393e+08	3.44277e+08
A0A452EWT7	5-oxoprolinase, ATP-hydrolysing	OPLAH	5-oxoprolinase, ATP-hydrolysing OS=Capra hircus OX=9925 GN=OPLAH PE=3 SV=1	182.536	30	30	98	30	1287	137.4	6.34	300.78	30	0	1	3.64595e+08	3.55157e+08	3.71883e+08	3.23001e+08	3.72261e+08	3.87382e+08	3.72899e+08	3.64858e+08
A0A452E2Y0	Clusterin	LOC102182127	Clusterin OS=Capra hircus OX=9925 GN=LOC102182127 PE=3 SV=1	181.078	36	15	101	15	439	50.9	6.07	351.03	15	0	1	7.53159e+08	8.50808e+08	7.71443e+08	8.07659e+08	8.13936e+08	6.9095e+08	7.83028e+08	7.65673e+08
A0A452EII2	Medium-chain specific acyl-CoA dehydrogenase, mitochondrial	LOC102179380	Medium-chain specific acyl-CoA dehydrogenase, mitochondrial OS=Capra hircus OX=9925 GN=LOC102179380 PE=3 SV=1	180.041	47	18	241	18	415	45.8	7.94	754.8	18	0	1	2.17189e+09	2.3488e+09	2.35621e+09	2.08867e+09	2.16584e+09	2.16746e+09	2.35341e+09	2.38751e+09
A0A452F1L3	Ral guanine nucleotide dissociation stimulator like 3	RGL3	Ral guanine nucleotide dissociation stimulator like 3 OS=Capra hircus OX=9925 GN=RGL3 PE=4 SV=1	179.227	47	28	85	28	618	71.2	8	295.67	28	0	1	2.1533e+08	2.16401e+08	2.17451e+08	2.05319e+08	2.16575e+08	2.14862e+08	2.08252e+08	2.1287e+08
A0A452EFR8	Coiled-coil domain containing 173	CCDC173	Coiled-coil domain containing 173 OS=Capra hircus OX=9925 GN=CCDC173 PE=4 SV=1	178.977	41	33	126	33	671	78.6	9.35	388.54	33	0	1	4.17363e+08	4.39193e+08	4.65583e+08	4.06723e+08	4.25729e+08	4.62094e+08	4.53628e+08	4.69689e+08
A0A452F3R4	Coiled-coil domain containing 105	CCDC105	Coiled-coil domain containing 105 OS=Capra hircus OX=9925 GN=CCDC105 PE=4 SV=1	175.27	51	28	169	28	500	57.5	9.64	502.54	28	0	1	7.64862e+08	8.15118e+08	8.33823e+08	8.21434e+08	8.27471e+08	7.98201e+08	8.05848e+08	8.62186e+08
A0A452DUV1	Acyl-CoA synthetase long chain family member 6	ACSL6	Acyl-CoA synthetase long chain family member 6 OS=Capra hircus OX=9925 GN=ACSL6 PE=4 SV=1	175.132	43	27	101	26	722	80.9	6.62	332.29	27	1	1	4.06174e+08	4.20229e+08	4.18482e+08	3.70582e+08	4.02446e+08	4.28036e+08	4.34095e+08	4.4517e+08
A0A452G4Q1	NME/NM23 family member 8	NME8	NME/NM23 family member 8 OS=Capra hircus OX=9925 GN=NME8 PE=4 SV=1	173.275	32	20	145	20	588	67.5	4.87	472.21	20	0	1	7.32526e+08	7.14582e+08	7.58388e+08	6.54801e+08	7.5209e+08	7.27545e+08	7.70132e+08	7.6148e+08
A0A452E9Q6	Meiosis-specific nuclear structural protein 1	MNS1	Meiosis-specific nuclear structural protein 1 OS=Capra hircus OX=9925 GN=MNS1 PE=3 SV=1	173.127	51	39	122	39	493	60.5	6.05	352.03	39	0	1	5.28574e+08	5.53214e+08	5.62558e+08	6.00642e+08	5.23233e+08	5.67858e+08	5.21059e+08	5.82977e+08
A0A452EG08	Regulator of G protein signaling 22	RGS22	Regulator of G protein signaling 22 OS=Capra hircus OX=9925 GN=RGS22 PE=4 SV=1	173.083	26	31	92	31	1215	141.1	8.4	309.8	31	0	1	2.87384e+08	2.97281e+08	3.08429e+08	2.72278e+08	3.11637e+08	3.26578e+08	3.30107e+08	3.20374e+08
A0A452G667			Uncharacterized protein OS=Capra hircus OX=9925 PE=4 SV=1	172.531	22	17	394	17	665	74	4.84	1288.83	17	0	1	5.34999e+09	5.51336e+09	5.18058e+09	4.77437e+09	5.23596e+09	4.41928e+09	4.9565e+09	4.6772e+09
A0A452EF84	Coiled-coil domain containing 63	CCDC63	Coiled-coil domain containing 63 OS=Capra hircus OX=9925 GN=CCDC63 PE=4 SV=1	172.371	47	28	109	28	555	65.5	8.94	332.62	28	0	1	3.92818e+08	4.1302e+08	4.24476e+08	4.28654e+08	4.13512e+08	4.15939e+08	3.94726e+08	4.15697e+08
A0A452FTL8	Tektin	TEKT4	Tektin OS=Capra hircus OX=9925 GN=TEKT4 PE=3 SV=1	171.669	51	25	242	24	447	51.7	6.44	741.03	25	0	1	1.53972e+09	1.65155e+09	1.73843e+09	1.51894e+09	1.6165e+09	1.69631e+09	1.73144e+09	1.86452e+09
A0A452FUJ9	Heat shock protein family A (Hsp70) member 4 like	HSPA4L	Heat shock protein family A (Hsp70) member 4 like OS=Capra hircus OX=9925 GN=HSPA4L PE=3 SV=1	170.946	31	31	93	31	1023	115.4	5.43	290.83	31	0	1	3.02111e+08	3.14745e+08	3.01833e+08	2.919e+08	3.15349e+08	3.17673e+08	3.20409e+08	3.16851e+08
A0A452DQ06	Lon protease homolog, mitochondrial	LONP1	Lon protease homolog, mitochondrial OS=Capra hircus OX=9925 GN=LONP1 PE=3 SV=1	170.792	34	32	110	32	948	105.6	6.8	339.08	32	0	1	6.02973e+08	6.02993e+08	5.98324e+08	5.41266e+08	5.97535e+08	5.77856e+08	6.40969e+08	5.9839e+08
A0A452FP18	Casein kinase 2 alpha 1	CSNK2A1	Casein kinase 2 alpha 1 OS=Capra hircus OX=9925 GN=CSNK2A1 PE=3 SV=1	167.55	46	15	122	15	391	45.1	7.74	418.49	15	0	1	4.47971e+08	4.57805e+08	4.666e+08	4.43582e+08	4.58429e+08	4.4272e+08	4.62754e+08	4.71627e+08
A0A452EDS3	Chromosome 4 C7orf31 homolog	C7orf31	Chromosome 4 C7orf31 homolog OS=Capra hircus OX=9925 GN=C7orf31 PE=4 SV=1	166.959	41	20	80	20	584	67.5	7.55	308.55	20	0	1	4.90522e+08	5.22518e+08	5.62966e+08	4.66632e+08	5.2093e+08	5.48558e+08	5.62429e+08	6.18187e+08
A0A452DQC8	Isocitrate dehydrogenase [NADP]	IDH2	Isocitrate dehydrogenase [NADP] OS=Capra hircus OX=9925 GN=IDH2 PE=3 SV=1	166.382	45	20	149	19	452	50.7	8.69	484.98	20	1	1	8.676e+08	8.73568e+08	8.55548e+08	7.8594e+08	8.54168e+08	8.67015e+08	8.70554e+08	8.76718e+08
A0A452G2E8	Coiled-coil domain-containing protein 39	CCDC39	Coiled-coil domain-containing protein 39 OS=Capra hircus OX=9925 GN=CCDC39 PE=3 SV=1	165.704	35	37	121	37	931	108.9	7.05	333.44	37	0	1	5.49247e+08	5.87667e+08	5.85921e+08	5.51271e+08	5.96706e+08	5.82332e+08	5.83212e+08	6.20049e+08
A0A452ED39	Glutamine amidotransferase like class 1 domain containing 3A	GATD3A	Glutamine amidotransferase like class 1 domain containing 3A OS=Capra hircus OX=9925 GN=GATD3A PE=4 SV=1	165.278	53	11	117	11	274	28.6	8.48	395.15	11	0	1	5.82622e+08	6.22031e+08	6.15775e+08	5.82175e+08	6.33774e+08	5.95326e+08	6.35339e+08	6.5767e+08
A0A452FAL5	Family with sequence similarity 166 member A	FAM166A	Family with sequence similarity 166 member A OS=Capra hircus OX=9925 GN=FAM166A PE=4 SV=1	164.832	58	16	232	16	320	36.3	8.87	879.52	16	0	1	1.27539e+09	1.3593e+09	1.50507e+09	1.37016e+09	1.37134e+09	1.34142e+09	1.47206e+09	1.60547e+09
M4NBE4	78 kDa glucose-regulated protein	HSPA5	78 kDa glucose-regulated protein OS=Capra hircus OX=9925 GN=HSPA5 PE=2 SV=1	164.805	43	28	102	25	655	72.4	5.16	348.58	28	0	1	2.4214e+08	2.46464e+08	2.40174e+08	2.9278e+08	2.29574e+08	2.37426e+08	2.33193e+08	2.36494e+08
A0A452ETZ2	Enoyl-CoA delta isomerase 2	ECI2	Enoyl-CoA delta isomerase 2 OS=Capra hircus OX=9925 GN=ECI2 PE=4 SV=1	163.525	28	12	112	12	426	46.5	8.06	437.27	12	0	1	4.26635e+08	4.52556e+08	4.45045e+08	4.00171e+08	4.26988e+08	4.17104e+08	4.69289e+08	4.58095e+08
A0A452FNL7			Uncharacterized protein OS=Capra hircus OX=9925 PE=3 SV=1	161.799	29	23	103	23	855	96.6	5	313.76	23	0	1	3.75615e+08	3.64064e+08	3.68413e+08	3.09853e+08	3.7823e+08	3.83306e+08	3.66021e+08	3.57155e+08
A0A452DTX3	Solute carrier family 25 member 12	SLC25A12	Solute carrier family 25 member 12 OS=Capra hircus OX=9925 GN=SLC25A12 PE=3 SV=1	161.3	45	23	88	20	675	74.5	8.27	285.19	23	4	1	3.72315e+08	3.88908e+08	3.88219e+08	3.48902e+08	3.91237e+08	3.72283e+08	3.99433e+08	3.9313e+08
A0A452EJG9	Chromosome 8 C9orf24 homolog	C9orf24	Chromosome 8 C9orf24 homolog OS=Capra hircus OX=9925 GN=C9orf24 PE=4 SV=1	160.659	60	18	233	18	304	35.1	8.56	705.76	18	0	1	1.52757e+09	1.68294e+09	1.9209e+09	1.67196e+09	1.68043e+09	1.66831e+09	1.86881e+09	2.09604e+09
A0A452EAT2	Angiotensin-converting enzyme	ACE	Angiotensin-converting enzyme OS=Capra hircus OX=9925 GN=ACE PE=3 SV=1	159.732	17	24	188	24	1313	150.5	6.54	546.09	24	0	1	9.78324e+08	1.07566e+09	1.16743e+09	1.06707e+09	1.28696e+09	1.12115e+09	1.60245e+09	1.483e+09
A0A452E713	Family with sequence similarity 81 member B	FAM81B	Family with sequence similarity 81 member B OS=Capra hircus OX=9925 GN=FAM81B PE=4 SV=1	159.552	57	23	136	23	411	47.4	6.77	432.31	23	0	1	4.52394e+08	4.29119e+08	4.65169e+08	4.18498e+08	4.32632e+08	4.5577e+08	4.57228e+08	4.53378e+08
G5CC03	Milk fat globule EGF factor 8 protein (Fragment)		Milk fat globule EGF factor 8 protein (Fragment) OS=Capra hircus OX=9925 PE=2 SV=1	159.433	48	17	151	17	398	44.6	7.49	465.94	17	0	1	1.20235e+09	1.23175e+09	1.20404e+09	1.096e+09	1.2295e+09	1.15639e+09	1.18814e+09	1.1758e+09
A0A452F6E5	Succinate--CoA ligase [ADP-forming] subunit beta, mitochondrial	SUCLA2	Succinate--CoA ligase [ADP-forming] subunit beta, mitochondrial OS=Capra hircus OX=9925 GN=SUCLA2 PE=3 SV=1	159.403	46	20	125	20	463	50.2	6.95	408.64	20	0	1	8.14876e+08	8.53949e+08	8.77637e+08	8.42141e+08	8.43917e+08	8.41125e+08	8.87853e+08	8.94565e+08
A0A452FNW6	Glyceraldehyde-3-phosphate dehydrogenase	GAPDH	Glyceraldehyde-3-phosphate dehydrogenase OS=Capra hircus OX=9925 GN=GAPDH PE=3 SV=1	159.371	49	14	131	12	333	35.9	8.35	385.04	14	0	1	1.07424e+09	9.48388e+08	9.98217e+08	1.03885e+09	1.00764e+09	9.54002e+08	1.04657e+09	1.03958e+09
A0A452G8U6	Myosin heavy chain 2	MYH2	Myosin heavy chain 2 OS=Capra hircus OX=9925 GN=MYH2 PE=3 SV=1	158.839	20	34	63	5	1928	221.7	5.88	212.07	34	0	1	2.25348e+07	8.69663e+06	9.71075e+06	1.81456e+07	7.98614e+06	1.08837e+07	7.48901e+06	8.39001e+06
A0A452ENI4	Rhophilin associated tail protein 1	ROPN1	Rhophilin associated tail protein 1 OS=Capra hircus OX=9925 GN=ROPN1 PE=4 SV=1	158.093	47	8	233	8	212	23.9	5.43	690.34	8	0	1	1.66278e+09	1.59924e+09	1.67916e+09	2.08625e+09	1.96476e+09	1.52571e+09	1.72535e+09	1.72538e+09
A0A452DNE8	Tubulin polymerization promoting protein family member 2	TPPP2	Tubulin polymerization promoting protein family member 2 OS=Capra hircus OX=9925 GN=TPPP2 PE=3 SV=1	156.768	62	11	188	11	171	18.5	9.03	638.52	11	0	1	1.33064e+09	1.28883e+09	1.32418e+09	1.20283e+09	1.30398e+09	1.1706e+09	1.35374e+09	1.31035e+09
A0A452DQZ3	Cathepsin F	CTSF	Cathepsin F OS=Capra hircus OX=9925 GN=CTSF PE=3 SV=1	155.841	43	19	132	19	460	50.8	8.22	454.99	19	0	1	9.68027e+08	9.17046e+08	9.31962e+08	8.40445e+08	9.35531e+08	9.38121e+08	9.46232e+08	9.18204e+08
A0A452DVZ8	Cullin 3	CUL3	Cullin 3 OS=Capra hircus OX=9925 GN=CUL3 PE=3 SV=1	155.497	35	26	70	26	768	88.9	8.48	223.91	26	0	1	2.05106e+08	2.17601e+08	2.22939e+08	2.07624e+08	2.10489e+08	2.14051e+08	2.39325e+08	2.42001e+08
A0A452DRX9	Sperm acrosome associated 1	SPACA1	Sperm acrosome associated 1 OS=Capra hircus OX=9925 GN=SPACA1 PE=4 SV=1	155.432	40	8	435	8	280	30.9	4.51	1387.11	8	0	1	1.59644e+09	1.65026e+09	1.50917e+09	1.76275e+09	1.545e+09	1.48034e+09	1.55563e+09	1.52564e+09
A0A452EDV9	Acyl-CoA dehydrogenase short chain	ACADS	Acyl-CoA dehydrogenase short chain OS=Capra hircus OX=9925 GN=ACADS PE=3 SV=1	155.17	46	16	115	16	409	44.3	8.13	375.9	16	0	1	8.07639e+08	8.66694e+08	8.50626e+08	7.44861e+08	8.40104e+08	7.99104e+08	8.51805e+08	8.7003e+08
A0A452E568	Myosin-4	MYH4	Myosin-4 OS=Capra hircus OX=9925 GN=MYH4 PE=3 SV=1	154.115	18	30	67	1	1926	221.6	5.76	215.5	30	0	1	1.60517e+06	1.5833e+06	1.521e+06	1.67805e+06	855348	2.49359e+06	1.71313e+06	1.19422e+06
A0A452FQN0	ATP-dependent dihydroxyacetone kinase	TKFC	ATP-dependent dihydroxyacetone kinase OS=Capra hircus OX=9925 GN=TKFC PE=4 SV=1	153.415	43	21	87	21	625	64.1	7.88	273.83	21	0	1	3.93649e+08	3.69964e+08	3.99795e+08	3.78226e+08	4.22924e+08	4.46603e+08	4.19031e+08	4.30213e+08
A0A452FRH5	Electron transfer flavoprotein-ubiquinone oxidoreductase	ETFDH	Electron transfer flavoprotein-ubiquinone oxidoreductase OS=Capra hircus OX=9925 GN=ETFDH PE=4 SV=1	153.405	40	21	102	21	617	68.5	7.4	341.75	21	0	1	5.96401e+08	6.00181e+08	6.36875e+08	5.57158e+08	5.73389e+08	6.01869e+08	6.31001e+08	6.63174e+08
A0A452FQV1	T-complex protein 1 subunit eta	CCT7	T-complex protein 1 subunit eta OS=Capra hircus OX=9925 GN=CCT7 PE=3 SV=1	153.34	47	20	74	20	543	59.4	7.2	224.24	20	0	1	3.56133e+08	3.51328e+08	3.81526e+08	3.34999e+08	3.73252e+08	3.70525e+08	4.31701e+08	4.28636e+08
A0A452EJT8	T-complex protein 1 subunit delta	CCT4	T-complex protein 1 subunit delta OS=Capra hircus OX=9925 GN=CCT4 PE=3 SV=1	153.238	51	22	90	8	541	57.9	6.8	266.98	22	20	1	5.49788e+08	5.80879e+08	6.2699e+08	5.93788e+08	5.8463e+08	5.746e+08	7.0239e+08	7.07121e+08
A0A452G316	Androglobin	ADGB	Androglobin OS=Capra hircus OX=9925 GN=ADGB PE=3 SV=1	152.718	18	26	67	26	1635	186.9	8.21	210.89	26	0	1	2.8858e+08	2.98622e+08	3.01068e+08	2.60577e+08	2.84427e+08	3.06465e+08	3.00897e+08	3.09632e+08
A0A452DRW1	F-actin-capping protein subunit alpha	CAPZA3	F-actin-capping protein subunit alpha OS=Capra hircus OX=9925 GN=CAPZA3 PE=3 SV=1	152.499	57	15	312	15	299	35	8.12	977.29	15	0	1	1.49081e+09	1.4269e+09	1.57062e+09	1.38366e+09	1.59237e+09	1.56313e+09	1.63002e+09	1.62904e+09
A0A452DSR6	Ankyrin repeat and EF-hand domain containing 1	ANKEF1	Ankyrin repeat and EF-hand domain containing 1 OS=Capra hircus OX=9925 GN=ANKEF1 PE=4 SV=1	152.118	38	30	81	30	776	86.9	8.31	225.04	30	0	1	3.68456e+08	3.91393e+08	3.87583e+08	3.47446e+08	3.7707e+08	3.76893e+08	3.89675e+08	3.93264e+08
A0A452EGB1	Actin beta	ACTB	Actin beta OS=Capra hircus OX=9925 GN=ACTB PE=3 SV=1	151.822	43	13	167	6	375	41.7	5.48	530.19	13	15	1	1.44306e+09	1.18928e+09	1.24171e+09	1.26796e+09	1.18595e+09	1.25832e+09	1.23747e+09	1.22649e+09
A0A452F2N4	CCT-theta	CCT8	CCT-theta OS=Capra hircus OX=9925 GN=CCT8 PE=3 SV=1	151.358	45	25	98	25	553	60.2	5.74	292.02	25	0	1	3.97713e+08	4.17543e+08	4.50164e+08	4.10977e+08	4.19157e+08	4.31605e+08	5.13999e+08	5.13807e+08
A0A452G521	Cilia and flagella associated protein 54	CFAP54	Cilia and flagella associated protein 54 OS=Capra hircus OX=9925 GN=CFAP54 PE=4 SV=1	151.332	14	37	73	37	3074	349.6	8.18	214.04	37	0	1	2.53291e+08	2.51633e+08	2.56021e+08	2.41353e+08	2.26396e+08	2.5702e+08	2.59352e+08	2.78033e+08
A0A452ES61	Chromosome 25 C7orf61 homolog	C7orf61	Chromosome 25 C7orf61 homolog OS=Capra hircus OX=9925 GN=C7orf61 PE=4 SV=1	150.607	48	10	189	10	204	23.3	10.58	637.52	10	0	1	1.21156e+09	1.11264e+09	1.08284e+09	1.0685e+09	1.24445e+09	1.04697e+09	1.28419e+09	1.05677e+09
A0A452FZP6	Asparaginase-like protein 1	ASRGL1	Asparaginase-like protein 1 OS=Capra hircus OX=9925 GN=ASRGL1 PE=3 SV=1	150.374	42	11	198	11	309	32	7.36	531.72	11	0	1	2.07414e+09	2.15862e+09	2.20574e+09	1.93276e+09	2.15133e+09	2.04515e+09	2.24593e+09	2.27438e+09
A0A452E7X5	3-hydroxyisobutyrate dehydrogenase, mitochondrial	HIBADH	3-hydroxyisobutyrate dehydrogenase, mitochondrial OS=Capra hircus OX=9925 GN=HIBADH PE=3 SV=1	150.106	41	10	57	10	336	35.4	7.9	194.55	10	0	1	3.59825e+08	3.87178e+08	3.86514e+08	3.51919e+08	3.78881e+08	3.40906e+08	3.98635e+08	3.88019e+08
A0A452ER52	Electron transfer flavoprotein subunit alpha	ETFA	Electron transfer flavoprotein subunit alpha OS=Capra hircus OX=9925 GN=ETFA PE=3 SV=1	149.843	50	14	113	14	333	35	8.56	373.91	14	0	1	8.8103e+08	9.06307e+08	8.87689e+08	9.58148e+08	9.14122e+08	8.55755e+08	9.01655e+08	9.20826e+08
A0A452EU31	Phospholipid-transporting ATPase	ATP8B3	Phospholipid-transporting ATPase OS=Capra hircus OX=9925 GN=ATP8B3 PE=3 SV=1	148.846	19	26	71	25	1429	163.7	6.81	243.55	26	1	1	3.33487e+08	3.54478e+08	3.54248e+08	3.31717e+08	3.42111e+08	3.19444e+08	3.54604e+08	3.67473e+08
A0A3R5YJX4	Carnitine O-palmitoyltransferase		Carnitine O-palmitoyltransferase OS=Capra hircus OX=9925 PE=2 SV=1	148.202	28	22	141	22	771	88.3	8.84	402.99	22	0	1	6.49398e+08	6.84657e+08	6.67975e+08	5.9521e+08	6.65954e+08	6.46377e+08	6.86149e+08	7.0004e+08
A0A452FGP1	IQ motif containing GTPase activating protein 2	IQGAP2	IQ motif containing GTPase activating protein 2 OS=Capra hircus OX=9925 GN=IQGAP2 PE=4 SV=1	147.662	21	31	78	31	1579	181.4	5.74	249.51	31	0	1	2.70054e+08	2.96982e+08	2.75666e+08	2.62786e+08	2.66625e+08	2.8356e+08	2.73645e+08	2.88025e+08
A0A452FW95	Pitrilysin metalloproteinase 1	PITRM1	Pitrilysin metalloproteinase 1 OS=Capra hircus OX=9925 GN=PITRM1 PE=3 SV=1	147.088	25	23	92	23	1032	116.1	6.34	296.51	23	0	1	3.42531e+08	3.66159e+08	3.59883e+08	3.21188e+08	3.56106e+08	3.62274e+08	3.70653e+08	3.74552e+08
A0A452EYF6	Heat shock protein family A (Hsp70) member 8	HSPA8	Heat shock protein family A (Hsp70) member 8 OS=Capra hircus OX=9925 GN=HSPA8 PE=3 SV=1	146.848	35	22	157	4	643	70.5	5.47	509.87	22	8	1	5.54073e+07	5.92273e+07	5.25998e+07	1.01797e+08	5.61933e+07	5.91186e+07	5.03085e+07	5.11644e+07
A0A452GAH2	Citrate synthase	CS	Citrate synthase OS=Capra hircus OX=9925 GN=CS PE=3 SV=1	145.484	37	15	183	15	454	50.6	7.59	523.7	15	0	1	1.88836e+09	2.10573e+09	2.17936e+09	2.00606e+09	2.08796e+09	1.88514e+09	2.18991e+09	2.30857e+09
A0A452FY07	Acetyl-CoA acyltransferase 2	ACAA2	Acetyl-CoA acyltransferase 2 OS=Capra hircus OX=9925 GN=ACAA2 PE=3 SV=1	145.212	61	18	75	18	397	42.1	7.91	267.75	18	0	1	2.73942e+08	2.94369e+08	2.91693e+08	2.90502e+08	2.8953e+08	2.88991e+08	2.97427e+08	3.01995e+08
A0A452F1M8	Nucleoside-diphosphate kinase	AK7	Nucleoside-diphosphate kinase OS=Capra hircus OX=9925 GN=AK7 PE=4 SV=1	145.097	34	24	119	24	723	83	4.81	345.74	24	0	1	6.4521e+08	6.69638e+08	6.86679e+08	6.19923e+08	6.58265e+08	6.75181e+08	6.82213e+08	6.94774e+08
A0A452EL01	Dynamin-like 120 kDa protein, form S1	OPA1	Dynamin-like 120 kDa protein, form S1 OS=Capra hircus OX=9925 GN=OPA1 PE=4 SV=1	144.168	33	31	79	31	997	115.6	7.87	239.44	31	0	1	2.767e+08	3.35114e+08	2.84381e+08	2.64641e+08	2.83102e+08	2.87241e+08	2.88497e+08	2.91782e+08
A0A452ENX1	DnaJ heat shock protein family (Hsp40) member B13	DNAJB13	DnaJ heat shock protein family (Hsp40) member B13 OS=Capra hircus OX=9925 GN=DNAJB13 PE=4 SV=1	143.665	48	15	95	15	316	36.1	7.85	335.44	15	0	1	3.78497e+08	4.2109e+08	3.92561e+08	3.92396e+08	3.84948e+08	3.50596e+08	3.91365e+08	3.87986e+08
I1SKJ7	Sulfite oxidase		Sulfite oxidase OS=Capra hircus OX=9925 PE=2 SV=1	142.532	55	21	160	21	488	53.8	5.58	473.05	21	0	1	7.26076e+08	7.69217e+08	7.66013e+08	6.25467e+08	7.39711e+08	8.23843e+08	8.03046e+08	7.90362e+08
A0A452DRS8	Family with sequence similarity 205 member C	FAM205C	Family with sequence similarity 205 member C OS=Capra hircus OX=9925 GN=FAM205C PE=4 SV=1	142.214	44	18	134	18	399	43.8	9.36	407.85	18	0	1	1.41593e+09	1.12346e+09	1.15043e+09	8.80734e+08	1.29443e+09	1.18589e+09	1.62123e+09	1.0273e+09
A0A452EAI1	IZUMO family member 4	IZUMO4	IZUMO family member 4 OS=Capra hircus OX=9925 GN=IZUMO4 PE=3 SV=1	141.451	42	8	358	8	212	24.1	6.51	1172.27	8	0	1	2.8483e+09	2.93672e+09	2.96539e+09	2.53815e+09	2.7081e+09	2.50975e+09	2.98425e+09	2.81136e+09
A0A452EJ15	Carnitine palmitoyltransferase 2	CPT2	Carnitine palmitoyltransferase 2 OS=Capra hircus OX=9925 GN=CPT2 PE=3 SV=1	141.264	46	28	81	28	658	74.5	8.35	247.78	28	0	1	4.84443e+08	5.06961e+08	5.17615e+08	4.44235e+08	4.95068e+08	5.21747e+08	5.31094e+08	5.43026e+08
A0A452DZY0	Calcium binding tyrosine phosphorylation regulated	CABYR	Calcium binding tyrosine phosphorylation regulated OS=Capra hircus OX=9925 GN=CABYR PE=4 SV=1	140.766	45	14	156	14	382	41.3	7.52	516.34	14	0	1	2.28029e+09	2.23703e+09	2.21996e+09	2.08157e+09	2.34562e+09	2.22879e+09	2.35611e+09	2.23442e+09
A0A452DUE2	Dynein axonemal light intermediate chain 1	DNALI1	Dynein axonemal light intermediate chain 1 OS=Capra hircus OX=9925 GN=DNALI1 PE=4 SV=1	140.264	64	20	114	20	258	29.7	8.5	365.04	20	0	1	5.63445e+08	6.19511e+08	6.37992e+08	6.89153e+08	6.60291e+08	5.87791e+08	6.17245e+08	6.86991e+08
A0A452DXG0	ATP synthase subunit alpha	LOC102183240	ATP synthase subunit alpha OS=Capra hircus OX=9925 GN=LOC102183240 PE=3 SV=1	140.081	24	13	418	2	547	59.1	9.09	1162.93	13	0	1	4.036e+07	4.32467e+07	4.51404e+07	4.35787e+07	4.46986e+07	4.17471e+07	4.12221e+07	4.18258e+07
A0A452G885	Keratin 4	KRT4	Keratin 4 OS=Capra hircus OX=9925 GN=KRT4 PE=3 SV=1	138.891	37	22	102	13	525	55.9	7.87	290.8	22	10	1	4.11848e+08	3.5714e+08	3.93074e+08	3.01789e+08	4.35372e+08	4.89591e+08	4.71505e+08	3.89055e+08
A0A452F0G2	Hydroxysteroid 17-beta dehydrogenase 10	HSD17B10	Hydroxysteroid 17-beta dehydrogenase 10 OS=Capra hircus OX=9925 GN=HSD17B10 PE=3 SV=1	137.843	77	14	64	14	261	27.2	8.28	238.03	14	0	1	2.6379e+08	2.80369e+08	2.75581e+08	2.71643e+08	2.85385e+08	2.5418e+08	2.77397e+08	2.88454e+08
A0A452ENV0	von Willebrand factor A domain containing 8	VWA8	von Willebrand factor A domain containing 8 OS=Capra hircus OX=9925 GN=VWA8 PE=4 SV=1	137.719	20	34	59	34	1877	210.6	7.17	162.33	34	0	1	1.46006e+08	1.58439e+08	1.51136e+08	1.37678e+08	1.46015e+08	1.51131e+08	1.50682e+08	1.49993e+08
A0A452FJE8	Aldehyde dehydrogenase 9 family member A1	ALDH9A1	Aldehyde dehydrogenase 9 family member A1 OS=Capra hircus OX=9925 GN=ALDH9A1 PE=3 SV=1	137.021	36	17	87	17	494	53.9	5.59	299.08	17	0	1	3.67687e+08	3.79969e+08	4.07942e+08	3.60197e+08	3.90639e+08	3.90257e+08	4.28073e+08	4.34188e+08
A0A452FXG0	F-actin-capping protein subunit beta		F-actin-capping protein subunit beta OS=Capra hircus OX=9925 PE=3 SV=1	136.777	72	9	287	9	110	12.7	4.7	1054.1	9	0	1	1.90826e+09	1.90238e+09	2.0027e+09	1.61974e+09	1.9114e+09	2.0718e+09	2.08343e+09	2.08764e+09
A0A452DR91	Phosphoglycerate mutase	PGAM2	Phosphoglycerate mutase OS=Capra hircus OX=9925 GN=PGAM2 PE=3 SV=1	136.609	52	15	167	11	253	28.7	8.9	521.51	15	7	1	8.24478e+08	8.32322e+08	8.6479e+08	8.9822e+08	9.16133e+08	8.48273e+08	9.21213e+08	1.0034e+09
A0A452E712	Adenylate kinase isoenzyme 1	AK1	Adenylate kinase isoenzyme 1 OS=Capra hircus OX=9925 GN=AK1 PE=3 SV=1	136.531	72	14	118	14	194	21.6	8.32	361.23	14	0	1	1.56142e+09	1.64026e+09	1.66107e+09	1.61024e+09	1.60845e+09	1.47375e+09	1.65118e+09	1.71374e+09
A0A452EYB5			Uncharacterized protein OS=Capra hircus OX=9925 PE=4 SV=1	136.264	48	24	121	24	519	56.4	9.58	369.95	24	0	1	3.79498e+08	3.90481e+08	3.81773e+08	3.39194e+08	3.82686e+08	3.78482e+08	3.80569e+08	3.74121e+08
A0A452F0F0	Cytochrome c1, heme protein, mitochondrial	CYC1	Cytochrome c1, heme protein, mitochondrial OS=Capra hircus OX=9925 GN=CYC1 PE=3 SV=1	135.482	27	7	70	7	325	35.3	8.98	211.88	7	0	1	2.18863e+08	2.36147e+08	2.37205e+08	2.4382e+08	2.40463e+08	2.31319e+08	2.35191e+08	2.59176e+08
A0A452F7J1	MYCBP associated and testis expressed 1	MAATS1	MYCBP associated and testis expressed 1 OS=Capra hircus OX=9925 GN=MAATS1 PE=4 SV=1	134.885	38	23	68	23	603	71	6.3	218.93	23	0	1	1.58481e+08	1.66983e+08	1.6224e+08	1.55518e+08	1.58903e+08	1.5368e+08	1.57367e+08	1.60311e+08
A0A452FZD4	Septin 4	SEPTIN4	Septin 4 OS=Capra hircus OX=9925 GN=SEPTIN4 PE=3 SV=1	134.827	48	21	80	20	477	54.9	6	257.1	21	1	1	3.50389e+08	3.58757e+08	3.74655e+08	3.16656e+08	3.62982e+08	3.76925e+08	3.7607e+08	3.87584e+08
A0A452EUL4	Coiled-coil domain containing 81	CCDC81	Coiled-coil domain containing 81 OS=Capra hircus OX=9925 GN=CCDC81 PE=4 SV=1	133.202	40	24	87	24	654	76.1	9.28	247.11	24	0	1	3.28923e+08	3.44355e+08	3.66838e+08	3.6208e+08	3.63649e+08	3.57294e+08	3.61319e+08	3.93129e+08
A0A452FEZ4	Succinate--CoA ligase [ADP/GDP-forming] subunit alpha, mitochondrial	SUCLG1	Succinate--CoA ligase [ADP/GDP-forming] subunit alpha, mitochondrial OS=Capra hircus OX=9925 GN=SUCLG1 PE=3 SV=1	132.864	35	11	75	11	395	41.3	8.84	225.07	11	0	1	5.24685e+08	5.48003e+08	5.4953e+08	5.34903e+08	5.58342e+08	5.38177e+08	5.6266e+08	5.8009e+08
A0A452FW63	Acyl-CoA thioesterase 9	ACOT9	Acyl-CoA thioesterase 9 OS=Capra hircus OX=9925 GN=ACOT9 PE=4 SV=1	132.767	35	15	89	15	441	50.2	8.53	271.53	15	0	1	3.8553e+08	4.15375e+08	4.04937e+08	3.87417e+08	3.94024e+08	3.82771e+08	4.01226e+08	4.07979e+08
A0A452F8E0	Leucine zipper-EF-hand-containing transmembrane protein 1	LETM1	Leucine zipper-EF-hand-containing transmembrane protein 1 OS=Capra hircus OX=9925 GN=LETM1 PE=3 SV=1	132.439	29	20	50	20	732	81.5	6.47	190.42	20	0	1	2.33274e+08	2.31171e+08	2.3656e+08	2.73893e+08	2.53971e+08	2.2806e+08	2.31303e+08	2.40672e+08
A0A452DKA1	Cilia and flagella associated protein 70	CFAP70	Cilia and flagella associated protein 70 OS=Capra hircus OX=9925 GN=CFAP70 PE=4 SV=1	131.694	23	22	74	22	1008	112.8	5.24	212.53	22	0	1	2.29295e+08	2.2777e+08	2.36268e+08	2.08971e+08	2.32876e+08	2.35416e+08	2.40347e+08	2.43943e+08
A0A452E104	Phosphoglycerate kinase	PGK1	Phosphoglycerate kinase OS=Capra hircus OX=9925 GN=PGK1 PE=3 SV=1	131.242	46	15	158	7	417	44.5	8.27	471.86	15	0	1	7.89087e+07	7.1113e+07	7.02836e+07	7.84093e+07	6.41523e+07	6.94098e+07	7.28945e+07	7.55769e+07
A0A452EBE6	Solute carrier family 2 member 3	SLC2A3	Solute carrier family 2 member 3 OS=Capra hircus OX=9925 GN=SLC2A3 PE=3 SV=1	131.181	15	7	289	7	496	54.4	5.45	849.73	7	0	1	1.8287e+09	1.98187e+09	1.9104e+09	1.81102e+09	1.92602e+09	1.80479e+09	1.9155e+09	1.92438e+09
A0A452EWU3	AFG3 like matrix AAA peptidase subunit 2	AFG3L2	AFG3 like matrix AAA peptidase subunit 2 OS=Capra hircus OX=9925 GN=AFG3L2 PE=3 SV=1	131.116	37	31	107	31	802	88.9	8.63	308.41	31	0	1	6.25505e+08	6.29118e+08	6.58479e+08	6.10238e+08	6.20266e+08	6.04701e+08	6.71701e+08	6.67472e+08
A0A452E5B4	Peroxiredoxin-5	PRDX5	Peroxiredoxin-5 OS=Capra hircus OX=9925 GN=PRDX5 PE=3 SV=1	130.775	61	10	102	10	212	22.4	8.46	354.39	10	0	1	1.04749e+09	1.03353e+09	1.20103e+09	1.4671e+09	1.22521e+09	9.49923e+08	1.16962e+09	1.32205e+09
A0A452EQ77	Stabilizer of axonemal microtubules 1	SAXO1	Stabilizer of axonemal microtubules 1 OS=Capra hircus OX=9925 GN=SAXO1 PE=3 SV=1	130.752	49	21	110	21	476	54.5	8.57	330.94	21	0	1	1.00947e+09	1.03225e+09	1.10933e+09	9.95752e+08	1.09202e+09	1.16741e+09	1.13311e+09	1.20788e+09
A0A452F9Q7	Mitochondria-eating protein	SPATA18	Mitochondria-eating protein OS=Capra hircus OX=9925 GN=SPATA18 PE=3 SV=1	130.305	29	15	76	15	559	63.1	9	244.52	15	0	1	5.423e+08	5.52419e+08	4.92772e+08	5.12008e+08	4.92752e+08	6.8276e+08	5.25672e+08	5.16846e+08
A0A452ECM2	Protein phosphatase 1 regulatory subunit 32	PPP1R32	Protein phosphatase 1 regulatory subunit 32 OS=Capra hircus OX=9925 GN=PPP1R32 PE=4 SV=1	129.291	50	18	69	18	428	48.1	8.46	204.36	18	0	1	3.68265e+08	3.75326e+08	3.79883e+08	3.55718e+08	3.71171e+08	3.79077e+08	3.81745e+08	3.8489e+08
A0A452F093	Fructose-bisphosphatase	FBP2	Fructose-bisphosphatase OS=Capra hircus OX=9925 GN=FBP2 PE=3 SV=1	128.725	53	19	92	17	349	38.2	6.57	294.32	19	3	1	5.85399e+08	5.87085e+08	6.28209e+08	5.90913e+08	5.98049e+08	5.8555e+08	6.76884e+08	6.93323e+08
A0A452FXE9	Angiotensin-converting enzyme	LOC106503207	Angiotensin-converting enzyme OS=Capra hircus OX=9925 GN=LOC106503207 PE=3 SV=1	128.361	24	20	140	20	722	84.3	7.08	396.44	20	0	1	1.45723e+09	1.57374e+09	1.54135e+09	1.38885e+09	1.50105e+09	1.38687e+09	1.53873e+09	1.52549e+09
A0A452DKF1	VAMP associated protein A	VAPA	VAMP associated protein A OS=Capra hircus OX=9925 GN=VAPA PE=4 SV=1	127.988	60	15	150	14	294	32.4	9.04	468.47	15	1	1	1.23945e+09	1.24001e+09	1.24951e+09	1.14134e+09	1.23252e+09	1.22107e+09	1.35894e+09	1.2248e+09
A0A452FKT4	Nuclear pore complex protein Nup93	NUP93	Nuclear pore complex protein Nup93 OS=Capra hircus OX=9925 GN=NUP93 PE=3 SV=1	127.971	33	27	88	27	819	93.4	5.72	261.97	27	0	1	2.80183e+08	3.06712e+08	2.90771e+08	2.72211e+08	2.87713e+08	2.78671e+08	2.8837e+08	2.90199e+08
A0A097C2Z1	Tyrosine 3-monooxygenase/tryptophan 5-monooxygenase activation protein zeta (Fragment)	YWHAZ	Tyrosine 3-monooxygenase/tryptophan 5-monooxygenase activation protein zeta (Fragment) OS=Capra hircus OX=9925 GN=YWHAZ PE=2 SV=1	127.201	54	16	126	11	245	27.7	4.79	413.49	16	7	1	6.48497e+08	6.39531e+08	6.62428e+08	6.39788e+08	6.57442e+08	6.06271e+08	6.7284e+08	6.58527e+08
A0A452FAN0	2-phospho-D-glycerate hydro-lyase	ENO3	2-phospho-D-glycerate hydro-lyase OS=Capra hircus OX=9925 GN=ENO3 PE=3 SV=1	126.983	33	11	178	5	434	47	7.66	538.11	11	0	1	5.37133e+07	4.06603e+07	4.32126e+07	3.88231e+07	4.09718e+07	4.28945e+07	3.80636e+07	4.36076e+07
A0A452EVX4	CCT-alpha	TCP1	CCT-alpha OS=Capra hircus OX=9925 GN=TCP1 PE=3 SV=1	126.667	36	18	75	18	556	60.3	5.99	229.11	18	0	1	3.51805e+08	3.64708e+08	3.8005e+08	3.46583e+08	3.72858e+08	3.74899e+08	4.03339e+08	4.13121e+08
A0A452EG24	Aspartate aminotransferase	GOT2	Aspartate aminotransferase OS=Capra hircus OX=9925 GN=GOT2 PE=3 SV=1	126.225	40	17	110	17	430	47.5	9.07	325.88	17	0	1	6.99483e+08	7.20969e+08	7.6186e+08	7.17418e+08	7.16163e+08	7.20488e+08	7.70377e+08	7.78895e+08
A0A452FRE1	Isoleucyl-tRNA synthetase	IARS2	Isoleucyl-tRNA synthetase OS=Capra hircus OX=9925 GN=IARS2 PE=3 SV=1	125.789	24	20	79	20	1012	113.6	7.2	265.02	20	0	1	4.30261e+08	4.77992e+08	4.47422e+08	3.95836e+08	4.43741e+08	4.53425e+08	4.5938e+08	4.65782e+08
A0A452DWD8	Pyruvate dehydrogenase E1 component subunit alpha	PDHA2	Pyruvate dehydrogenase E1 component subunit alpha OS=Capra hircus OX=9925 GN=PDHA2 PE=4 SV=1	125.389	48	22	265	14	391	43.3	8.41	738.04	22	12	1	2.35841e+09	2.51087e+09	2.55276e+09	2.25483e+09	2.4077e+09	2.44011e+09	2.64134e+09	2.68889e+09
A0A452EFY7	Actin related protein T3	ACTRT3	Actin related protein T3 OS=Capra hircus OX=9925 GN=ACTRT3 PE=3 SV=1	124.604	38	12	136	12	368	40.6	6.29	456.6	12	0	1	1.08027e+09	1.04117e+09	1.04589e+09	8.91878e+08	1.08209e+09	1.03536e+09	1.18314e+09	1.03969e+09
A0A452G0Z3	Dynein axonemal intermediate chain 2	DNAI2	Dynein axonemal intermediate chain 2 OS=Capra hircus OX=9925 GN=DNAI2 PE=4 SV=1	124.159	31	15	69	15	514	58.2	5.03	240.52	15	0	1	3.74407e+08	4.10751e+08	3.98961e+08	3.6182e+08	3.85865e+08	3.88789e+08	4.12663e+08	4.23179e+08
A0A452E1Q2	ATP-binding cassette sub-family A member 17	LOC102183842	ATP-binding cassette sub-family A member 17 OS=Capra hircus OX=9925 GN=LOC102183842 PE=4 SV=1	124.124	12	19	67	19	1667	188.7	6.67	215.85	19	0	1	2.81893e+08	2.89293e+08	3.04705e+08	2.65069e+08	2.86488e+08	2.90233e+08	3.02301e+08	3.11987e+08
A0A452E012	Enkurin, TRPC channel interacting protein	ENKUR	Enkurin, TRPC channel interacting protein OS=Capra hircus OX=9925 GN=ENKUR PE=4 SV=1	123.967	55	16	75	16	256	29.8	9.45	254.64	16	0	1	2.45603e+08	2.79304e+08	2.87629e+08	3.62296e+08	3.23574e+08	2.59827e+08	2.8319e+08	3.39564e+08
A0A452FLC3	Coiled-coil domain containing 27	CCDC27	Coiled-coil domain containing 27 OS=Capra hircus OX=9925 GN=CCDC27 PE=4 SV=1	123.594	32	19	65	19	653	75.3	5.26	220.19	19	0	1	1.74897e+08	1.78876e+08	1.73686e+08	1.53603e+08	1.70766e+08	1.84502e+08	1.69202e+08	1.79534e+08
A0A452G4Z8	Membrane metalloendopeptidase like 1	MMEL1	Membrane metalloendopeptidase like 1 OS=Capra hircus OX=9925 GN=MMEL1 PE=4 SV=1	123.543	25	15	76	15	774	88.3	6.18	239.59	15	0	1	3.79444e+08	3.90219e+08	3.66816e+08	3.4221e+08	3.80407e+08	3.55075e+08	3.61664e+08	3.61238e+08
A0A452E959	Leucine rich repeat containing 23	LRRC23	Leucine rich repeat containing 23 OS=Capra hircus OX=9925 GN=LRRC23 PE=4 SV=1	123.031	51	16	60	16	342	39.6	4.67	202.28	16	0	1	1.97601e+08	2.09504e+08	2.08316e+08	1.84997e+08	2.06327e+08	2.00675e+08	2.0782e+08	2.09949e+08
A0A452E0U7	Phospholipid-transporting ATPase	ATP11C	Phospholipid-transporting ATPase OS=Capra hircus OX=9925 GN=ATP11C PE=3 SV=1	122.382	20	20	80	19	1116	128.3	6.87	269.79	20	0	1	3.08322e+08	3.14248e+08	3.10753e+08	2.83522e+08	2.90631e+08	3.08506e+08	3.27118e+08	3.22269e+08
A0A452EKB7	Isocitrate dehydrogenase [NAD] subunit, mitochondrial	IDH3A	Isocitrate dehydrogenase [NAD] subunit, mitochondrial OS=Capra hircus OX=9925 GN=IDH3A PE=3 SV=1	121.769	44	15	126	15	366	39.7	7.2	346.51	15	0	1	1.46702e+09	1.57828e+09	1.52962e+09	1.4154e+09	1.52644e+09	1.48368e+09	1.57902e+09	1.58963e+09
A0A452F6B6	Nardilysin convertase	NRDC	Nardilysin convertase OS=Capra hircus OX=9925 GN=NRDC PE=3 SV=1	121.437	15	17	55	17	1162	132.8	4.91	199.11	17	0	1	1.63515e+08	1.57628e+08	1.62595e+08	1.3295e+08	1.57884e+08	1.58806e+08	1.89281e+08	1.58902e+08
A0A452EMJ0	Serine/threonine-protein phosphatase	PPP1CC	Serine/threonine-protein phosphatase OS=Capra hircus OX=9925 GN=PPP1CC PE=3 SV=1	121.136	53	13	125	6	314	35.9	7.01	463.66	13	9	1	6.74416e+08	6.16101e+08	6.27713e+08	6.08072e+08	5.85075e+08	6.34834e+08	6.24951e+08	6.64988e+08
A0A452E7G7	Family with sequence similarity 71 member A	FAM71A	Family with sequence similarity 71 member A OS=Capra hircus OX=9925 GN=FAM71A PE=4 SV=1	120.552	24	16	102	15	585	63.6	9.58	292.24	16	0	1	6.37671e+08	6.20135e+08	5.9222e+08	5.17774e+08	6.31385e+08	5.93438e+08	6.29742e+08	5.77766e+08
A0A452ET92	Carnitine O-acetyltransferase	CRAT	Carnitine O-acetyltransferase OS=Capra hircus OX=9925 GN=CRAT PE=3 SV=1	120.097	29	19	95	19	626	70.9	8.5	260.27	19	0	1	5.35328e+08	5.81648e+08	5.70456e+08	5.09852e+08	5.69862e+08	5.75452e+08	5.86495e+08	5.94133e+08
A0A452FJB0	Sorbitol dehydrogenase	SORD	Sorbitol dehydrogenase OS=Capra hircus OX=9925 GN=SORD PE=3 SV=1	120.09	41	13	126	13	356	38.1	7.46	399.29	13	0	1	1.34887e+09	1.36216e+09	1.43038e+09	1.33731e+09	1.40902e+09	1.4095e+09	1.61889e+09	1.65999e+09
A0A452FF21	Tektin	TEKT1	Tektin OS=Capra hircus OX=9925 GN=TEKT1 PE=3 SV=1	119.855	39	19	121	19	418	48.7	6.13	386.27	19	0	1	9.03621e+08	9.29402e+08	1.04255e+09	1.00345e+09	1.03457e+09	9.30714e+08	9.70094e+08	1.09001e+09
A0A452G4N8	Phosphoinositide phospholipase C	PLCZ1	Phosphoinositide phospholipase C OS=Capra hircus OX=9925 GN=PLCZ1 PE=4 SV=1	119.807	28	17	74	17	631	73.4	6.89	241.69	17	0	1	4.25087e+08	4.75262e+08	4.2291e+08	3.8698e+08	4.38324e+08	4.69496e+08	4.43794e+08	4.43725e+08
A0A452ELR9	NADH-cytochrome b5 reductase	CYB5R1	NADH-cytochrome b5 reductase OS=Capra hircus OX=9925 GN=CYB5R1 PE=3 SV=1	119.538	48	15	118	15	305	33.8	9.26	369.26	15	0	1	9.98478e+08	1.07034e+09	1.08272e+09	1.03422e+09	1.08924e+09	9.91923e+08	1.0898e+09	1.14691e+09
A0A452EHN0	Arylsulfatase A	ARSA	Arylsulfatase A OS=Capra hircus OX=9925 GN=ARSA PE=3 SV=1	119.219	25	10	114	10	507	53.8	5.48	329.23	10	0	1	1.04627e+09	1.05755e+09	1.03852e+09	9.02789e+08	1.06942e+09	1.02742e+09	1.07219e+09	1.08397e+09
A0A452FSP4	Kinesin-like protein	KIF9	Kinesin-like protein OS=Capra hircus OX=9925 GN=KIF9 PE=3 SV=1	118.775	31	25	90	24	787	89.3	7.42	246.31	25	1	1	3.94485e+08	3.5802e+08	3.65178e+08	3.76464e+08	3.04966e+08	3.50473e+08	3.68681e+08	3.91299e+08
A0A452FQM6	NADH dehydrogenase [ubiquinone] flavoprotein 1, mitochondrial	NDUFV1	NADH dehydrogenase [ubiquinone] flavoprotein 1, mitochondrial OS=Capra hircus OX=9925 GN=NDUFV1 PE=3 SV=1	118.544	43	18	107	18	464	50.6	8.21	329.81	18	0	1	7.07845e+08	7.39225e+08	7.60576e+08	6.39309e+08	7.52258e+08	7.69776e+08	8.0546e+08	8.0389e+08
A0A452FM75	Huntingtin interacting protein 1	HIP1	Huntingtin interacting protein 1 OS=Capra hircus OX=9925 GN=HIP1 PE=3 SV=1	118.501	24	22	54	22	1019	114	5.39	180.79	22	0	1	1.9455e+08	1.97067e+08	2.06237e+08	1.83925e+08	1.99956e+08	2.02086e+08	2.19538e+08	2.14319e+08
A0A452ERW8	Dihydrolipoyllysine-residue succinyltransferase component of 2-oxoglutarate dehydrogenase complex, mitochondrial	DLST	Dihydrolipoyllysine-residue succinyltransferase component of 2-oxoglutarate dehydrogenase complex, mitochondrial OS=Capra hircus OX=9925 GN=DLST PE=3 SV=1	118.272	33	14	105	14	455	48.9	8.95	325.89	14	0	1	7.36284e+08	7.7139e+08	7.68992e+08	7.15518e+08	7.69079e+08	6.92776e+08	7.96405e+08	7.49532e+08
A0A452E8D8	Protein kinase cAMP-dependent type I regulatory subunit alpha	PRKAR1A	Protein kinase cAMP-dependent type I regulatory subunit alpha OS=Capra hircus OX=9925 GN=PRKAR1A PE=3 SV=1	117.851	33	15	85	15	380	42.9	5.35	296.71	15	0	1	3.29141e+08	3.34137e+08	3.49768e+08	3.23015e+08	3.3892e+08	3.63501e+08	3.51604e+08	3.496e+08
A0A452E8M7	Isocitrate dehydrogenase [NAD] subunit, mitochondrial	IDH3B	Isocitrate dehydrogenase [NAD] subunit, mitochondrial OS=Capra hircus OX=9925 GN=IDH3B PE=3 SV=1	117.674	41	12	61	12	385	42.5	8.68	213.39	12	0	1	3.53154e+08	3.41601e+08	3.56287e+08	3.22649e+08	3.56372e+08	3.55032e+08	3.53751e+08	3.554e+08
A0A452FEJ8	T-complex protein 1 subunit delta	LOC102170672	T-complex protein 1 subunit delta OS=Capra hircus OX=9925 GN=LOC102170672 PE=3 SV=1	117.545	36	16	68	2	529	56.8	6.96	199.78	16	0	1	1.64997e+07	1.93749e+07	1.72128e+07	2.00755e+07	1.76691e+07	1.7321e+07	1.7107e+07	1.79636e+07
A0A452ECC6	Prohibitin	PHB	Prohibitin OS=Capra hircus OX=9925 GN=PHB PE=3 SV=1	117.396	59	14	73	14	272	29.8	5.76	250.5	14	0	1	3.68233e+08	3.97782e+08	4.23228e+08	4.74942e+08	4.21174e+08	3.46664e+08	4.08343e+08	4.63787e+08
I7ARG8	Heat shock protein beta-9	HspB9	Heat shock protein beta-9 OS=Capra hircus OX=9925 GN=HspB9 PE=2 SV=1	117.192	68	8	294	8	157	16.8	7.96	875.04	8	0	1	1.20927e+09	1.23899e+09	1.23503e+09	1.11883e+09	1.19417e+09	1.21225e+09	1.30886e+09	1.19846e+09
A0A452G0B9	Sperm associated antigen 6	SPAG6	Sperm associated antigen 6 OS=Capra hircus OX=9925 GN=SPAG6 PE=4 SV=1	117.079	39	16	53	16	509	55.4	6.84	172.84	16	0	1	4.30008e+08	4.24686e+08	4.42459e+08	3.67311e+08	4.92442e+08	5.05977e+08	4.22169e+08	4.07819e+08
A0A452FSS2	Acrosomal vesicle protein 1	ACRV1	Acrosomal vesicle protein 1 OS=Capra hircus OX=9925 GN=ACRV1 PE=4 SV=1	116.985	11	4	255	4	273	28.7	4.58	843.57	4	0	1	6.75526e+09	6.95162e+09	5.99287e+09	6.80668e+09	6.46909e+09	4.81776e+09	6.28884e+09	6.06319e+09
A0A452EYU1	WD repeat domain 63	DNAI3	WD repeat domain 63 OS=Capra hircus OX=9925 GN=DNAI3 PE=4 SV=1	116.651	28	25	83	25	888	102.6	5.72	234.92	25	0	1	2.69277e+08	2.90754e+08	2.66388e+08	2.68849e+08	2.45592e+08	2.67482e+08	2.67898e+08	2.84029e+08
C6ZEA2	Izumo sperm-egg fusion 1	Izumo1	Izumo sperm-egg fusion 1 OS=Capra hircus OX=9925 GN=Izumo1 PE=2 SV=1	115.707	35	10	69	10	320	36.1	7.12	247.94	10	0	1	1.14464e+09	1.18578e+09	1.18618e+09	1.10411e+09	1.18146e+09	1.08292e+09	1.20005e+09	1.22437e+09
A0A452FFR8	Glycerol kinase	GK	Glycerol kinase OS=Capra hircus OX=9925 GN=GK PE=3 SV=1	115.634	22	10	140	2	472	53.2	8.41	407.8	10	0	1	4.99399e+06	5.25622e+06	5.25497e+06	6.84746e+06	5.07221e+06	5.53614e+06	5.33069e+06	5.42164e+06
A0A452DUG3	Synaptosomal-associated protein	LOC108636029	Synaptosomal-associated protein OS=Capra hircus OX=9925 GN=LOC108636029 PE=3 SV=1	115.268	52	10	47	10	211	23.2	4.94	157.18	10	0	1	9.17968e+07	8.77361e+07	9.22608e+07	8.53553e+07	9.03844e+07	8.95606e+07	9.45684e+07	8.85865e+07
A0A452DNZ6	Actin-like protein 7B	ACTL7B	Actin-like protein 7B OS=Capra hircus OX=9925 GN=ACTL7B PE=3 SV=1	114.075	28	11	113	11	417	45.5	5.71	365.26	11	0	1	6.08384e+08	6.07981e+08	6.03874e+08	5.4135e+08	6.09728e+08	6.04837e+08	6.33191e+08	6.08505e+08
A0A452FQ33	Lamin A/C	LMNA	Lamin A/C OS=Capra hircus OX=9925 GN=LMNA PE=3 SV=1	113.922	31	22	68	22	665	74.2	7.18	213.25	22	0	1	1.28749e+08	1.30745e+08	1.31072e+08	1.18518e+08	1.32911e+08	1.33442e+08	1.28281e+08	1.27501e+08
A0A452DWC1	Cilia and flagella associated protein 52	CFAP52	Cilia and flagella associated protein 52 OS=Capra hircus OX=9925 GN=CFAP52 PE=4 SV=1	113.791	36	21	86	21	623	68.6	6.76	257.64	21	0	1	5.63978e+08	5.88671e+08	5.98327e+08	5.44242e+08	5.87083e+08	5.56045e+08	6.13235e+08	6.09193e+08
A0A452DN57	Coiled-coil domain-containing protein 164	DRC1	Coiled-coil domain-containing protein 164 OS=Capra hircus OX=9925 GN=DRC1 PE=3 SV=1	113.582	32	24	58	24	712	84	5.78	175.09	24	0	1	1.65874e+08	1.71785e+08	1.73438e+08	1.71763e+08	1.68727e+08	1.72522e+08	1.64936e+08	1.76143e+08
A0A452DMD7	Cilia and flagella associated protein 53		Cilia and flagella associated protein 53 OS=Capra hircus OX=9925 PE=4 SV=1	113.565	37	24	67	24	514	62.2	8.85	184.32	24	0	1	2.8014e+08	2.98718e+08	3.13417e+08	2.99588e+08	3.32317e+08	3.23259e+08	3.02229e+08	3.25733e+08
A0A452FB63	UBX domain protein 11	UBXN11	UBX domain protein 11 OS=Capra hircus OX=9925 GN=UBXN11 PE=4 SV=1	112.994	40	16	62	16	472	53.1	6.14	200.43	16	0	1	2.49956e+08	2.60307e+08	2.50382e+08	2.37688e+08	2.68751e+08	2.54142e+08	2.51608e+08	2.6838e+08
A0A452EIK3	Septin	SEPTIN7	Septin OS=Capra hircus OX=9925 GN=SEPTIN7 PE=3 SV=1	111.601	44	20	104	19	430	50.1	8.62	280.63	20	0	1	4.1775e+08	4.29859e+08	4.33903e+08	3.71439e+08	4.34923e+08	4.4798e+08	4.59503e+08	4.47634e+08
A0A452E9Y1	Sulfide quinone oxidoreductase	SQOR	Sulfide quinone oxidoreductase OS=Capra hircus OX=9925 GN=SQOR PE=4 SV=1	111.597	41	19	69	19	450	49.9	9.32	222.28	19	0	1	3.52187e+08	3.69767e+08	3.84138e+08	3.46795e+08	3.65841e+08	3.639e+08	3.78651e+08	3.87362e+08
J7F3B7	Heat shock protein 70kDa protein 8	HSPA8	Heat shock protein 70kDa protein 8 OS=Capra hircus OX=9925 GN=HSPA8 PE=2 SV=1	111.43	25	16	113	1	650	71.6	5.64	350.17	16	0	1	1.49743e+08	1.54492e+08	1.52263e+08	1.30291e+08	1.51585e+08	1.39673e+08	1.53171e+08	1.50211e+08
A0A452DUI2	Propanoyl-CoA:carbon dioxide ligase subunit alpha	PCCA	Propanoyl-CoA:carbon dioxide ligase subunit alpha OS=Capra hircus OX=9925 GN=PCCA PE=4 SV=1	111.422	35	23	47	23	730	80.3	7.71	147.61	23	0	1	1.33794e+08	1.38766e+08	1.37467e+08	1.27952e+08	1.32456e+08	1.38104e+08	1.40594e+08	1.37469e+08
A0A452FFM4	Casein kinase 2 alpha 2	CSNK2A2	Casein kinase 2 alpha 2 OS=Capra hircus OX=9925 GN=CSNK2A2 PE=3 SV=1	111.112	43	13	62	13	350	41.2	8.56	207.9	13	0	1	2.96591e+08	2.94047e+08	3.20167e+08	3.20899e+08	3.35152e+08	2.91867e+08	3.32388e+08	3.39452e+08
A0A452FXG7	Mitochondrial import inner membrane translocase subunit TIM44	TIMM44	Mitochondrial import inner membrane translocase subunit TIM44 OS=Capra hircus OX=9925 GN=TIMM44 PE=3 SV=1	109.753	37	17	53	17	454	51.4	7.69	180.67	17	0	1	1.79973e+08	2.18851e+08	1.86153e+08	1.90078e+08	1.90972e+08	1.80865e+08	1.88579e+08	1.91206e+08
A0A452E219	Cytochrome c oxidase polypeptide Va	LOC102191741	Cytochrome c oxidase polypeptide Va OS=Capra hircus OX=9925 GN=LOC102191741 PE=3 SV=1	109.551	57	8	143	8	152	16.8	7.42	448.6	8	0	1	2.17265e+09	2.28274e+09	2.17369e+09	2.25385e+09	2.08501e+09	1.71957e+09	2.04913e+09	2.05581e+09
A0A452F327	Heat shock protein 90 alpha family class B member 1	HSP90AB1	Heat shock protein 90 alpha family class B member 1 OS=Capra hircus OX=9925 GN=HSP90AB1 PE=3 SV=1	108.917	24	18	62	7	724	83.2	5.03	180.9	18	2	1	3.91519e+07	3.78501e+07	3.65909e+07	4.39377e+07	3.96897e+07	4.15453e+07	3.83189e+07	3.65133e+07
A0A452DQP6	Actin alpha cardiac muscle 1	ACTC1	Actin alpha cardiac muscle 1 OS=Capra hircus OX=9925 GN=ACTC1 PE=3 SV=1	108.315	30	10	135	3	374	41.6	5.71	386.61	10	0	1	9.92598e+07	1.05785e+08	8.62232e+07	8.49399e+07	8.52229e+07	9.18966e+07	8.68306e+07	8.29935e+07
A0A452ECF9	Radial spoke head 6 homolog A	RSPH6A	Radial spoke head 6 homolog A OS=Capra hircus OX=9925 GN=RSPH6A PE=4 SV=1	107.714	24	13	75	13	710	80.3	4.37	229.54	13	0	1	3.07729e+08	3.17873e+08	3.20278e+08	2.81053e+08	3.22327e+08	3.07163e+08	3.14981e+08	3.223e+08
A0A452G3F0	Chromosome 26 C10orf62 homolog	C10orf62	Chromosome 26 C10orf62 homolog OS=Capra hircus OX=9925 GN=C10orf62 PE=4 SV=1	107.698	44	11	95	11	225	25.1	7.21	275.54	11	0	1	8.30979e+08	8.54948e+08	8.56846e+08	6.8037e+08	8.24435e+08	8.57434e+08	8.69665e+08	8.35494e+08
A0A452G969	Sodium/potassium-transporting ATPase subunit alpha	ATP1A2	Sodium/potassium-transporting ATPase subunit alpha OS=Capra hircus OX=9925 GN=ATP1A2 PE=3 SV=1	106.97	12	12	66	3	1013	111.1	5.64	186.03	12	0	1	3.03839e+07	3.1476e+07	2.83652e+07	2.70917e+07	2.86059e+07	3.09522e+07	2.83934e+07	2.83919e+07
A0A452EYE3	Nucleoporin 155	NUP155	Nucleoporin 155 OS=Capra hircus OX=9925 GN=NUP155 PE=3 SV=1	106.939	17	20	69	20	1391	155.1	6.25	206.78	20	0	1	2.40914e+08	2.65367e+08	2.55642e+08	2.37286e+08	2.56156e+08	2.50491e+08	2.46641e+08	2.55406e+08
A0A452E3C7	Chaperonin containing TCP1 subunit 8 like 2	CCT8L2	Chaperonin containing TCP1 subunit 8 like 2 OS=Capra hircus OX=9925 GN=CCT8L2 PE=3 SV=1	106.55	34	14	52	14	534	56.6	6.18	163.83	14	0	1	1.49008e+08	1.55643e+08	1.36566e+08	1.72669e+08	1.39303e+08	1.45641e+08	1.35449e+08	1.3825e+08
A0A452FXB5	Sperm autoantigenic protein 17	SPA17	Sperm autoantigenic protein 17 OS=Capra hircus OX=9925 GN=SPA17 PE=4 SV=1	106.264	58	7	90	7	147	17	5.03	336.87	7	0	1	9.35195e+08	8.19678e+08	7.63252e+08	1.02927e+09	7.90094e+08	9.85046e+08	6.89185e+08	8.51635e+08
A0A452EQF0	Cytochrome b-c1 complex subunit Rieske, mitochondrial	UQCRFS1	Cytochrome b-c1 complex subunit Rieske, mitochondrial OS=Capra hircus OX=9925 GN=UQCRFS1 PE=3 SV=1	106.258	39	10	111	10	274	29.5	8.87	376.37	10	0	1	1.10682e+09	1.1166e+09	1.11681e+09	1.04824e+09	1.07549e+09	9.49556e+08	1.10863e+09	1.10593e+09
A0A452EAN4	Fascin	FSCN3	Fascin OS=Capra hircus OX=9925 GN=FSCN3 PE=3 SV=1	105.667	25	10	92	10	498	56.1	6.95	314.48	10	0	1	4.3416e+08	4.01278e+08	4.25099e+08	4.16957e+08	4.13587e+08	4.71794e+08	4.5783e+08	4.29751e+08
A0A452F7L7	RIB43A domain with coiled-coils 2	RIBC2	RIB43A domain with coiled-coils 2 OS=Capra hircus OX=9925 GN=RIBC2 PE=3 SV=1	105.614	40	15	55	15	377	44.7	8.54	173.63	15	0	1	2.56814e+08	2.65854e+08	2.63224e+08	2.55758e+08	2.72787e+08	2.39133e+08	2.65296e+08	2.68506e+08
A0A452DKR6	Outer dense fiber of sperm tails 3	ODF3	Outer dense fiber of sperm tails 3 OS=Capra hircus OX=9925 GN=ODF3 PE=4 SV=1	104.848	74	16	97	16	254	27.6	9.83	298.25	16	0	1	7.69986e+08	8.29137e+08	8.21985e+08	7.45544e+08	7.64109e+08	6.96052e+08	7.9248e+08	8.15642e+08
A0A452EYV3	Kelch like family member 10	KLHL10	Kelch like family member 10 OS=Capra hircus OX=9925 GN=KLHL10 PE=4 SV=1	104.727	34	18	47	18	599	68.1	5.99	164.31	18	0	1	8.87005e+07	9.10492e+07	8.95735e+07	8.29182e+07	8.90609e+07	9.02763e+07	9.62621e+07	9.55072e+07
A0A452F7K1	Leucine rich repeats and death domain containing 1	LRRD1	Leucine rich repeats and death domain containing 1 OS=Capra hircus OX=9925 GN=LRRD1 PE=4 SV=1	104.496	27	22	71	22	863	98.5	7.44	217.23	22	0	1	2.84745e+08	2.97712e+08	2.92038e+08	2.64419e+08	2.82855e+08	3.01523e+08	2.8616e+08	2.903e+08
A0A452EJP9	Radial spoke head component 9	RSPH9	Radial spoke head component 9 OS=Capra hircus OX=9925 GN=RSPH9 PE=4 SV=1	104.381	55	13	99	13	276	31.3	5.57	261.27	13	0	1	4.45651e+08	4.96054e+08	4.92081e+08	4.61777e+08	4.87626e+08	4.40139e+08	5.05278e+08	5.11017e+08
A0A452EFX8	Septin	SEPTIN12	Septin OS=Capra hircus OX=9925 GN=SEPTIN12 PE=3 SV=1	104.371	45	15	70	15	361	41.2	7.72	200.42	15	0	1	3.28515e+08	3.38664e+08	3.48968e+08	3.17973e+08	3.3923e+08	3.44988e+08	3.562e+08	3.60287e+08
A0A452ETE8	Chaperonin containing TCP1 subunit 6A	CCT6A	Chaperonin containing TCP1 subunit 6A OS=Capra hircus OX=9925 GN=CCT6A PE=3 SV=1	104.123	41	19	51	12	531	57.9	6.76	168.1	19	0	1	6.66417e+07	6.6109e+07	7.73941e+07	7.50474e+07	7.26642e+07	7.3786e+07	9.07799e+07	9.25613e+07
A0A452DV55	Coiled-coil domain containing 114	CCDC114	Coiled-coil domain containing 114 OS=Capra hircus OX=9925 GN=CCDC114 PE=4 SV=1	102.81	30	20	59	20	693	78.1	6.79	186.85	20	0	1	2.61168e+08	2.704e+08	2.66973e+08	2.63529e+08	2.65676e+08	2.69762e+08	2.58096e+08	2.60848e+08
A0A452G2Q3	Glutamine synthetase	GLUL	Glutamine synthetase OS=Capra hircus OX=9925 GN=GLUL PE=3 SV=1	102.645	38	14	145	14	373	42	6.84	421.03	14	0	1	1.28106e+09	1.35273e+09	1.35873e+09	1.20759e+09	1.26724e+09	1.38634e+09	1.45478e+09	1.47474e+09
A0A452DLL7			Uncharacterized protein OS=Capra hircus OX=9925 PE=4 SV=1	102.22	60	13	53	13	281	30.4	4.59	197.31	13	0	1	3.68922e+08	3.83978e+08	3.58814e+08	3.02616e+08	3.89976e+08	3.46128e+08	3.58894e+08	3.50304e+08
A0A452G176	Ferritin	FTL	Ferritin OS=Capra hircus OX=9925 GN=FTL PE=3 SV=1	102.173	69	9	68	9	175	20	6.3	263.36	9	0	1	3.02245e+08	2.69684e+08	3.00457e+08	3.53948e+08	2.56833e+08	2.45601e+08	2.96002e+08	3.20314e+08
A0A452E1G9	Heat shock protein 90 beta family member 1	HSP90B1	Heat shock protein 90 beta family member 1 OS=Capra hircus OX=9925 GN=HSP90B1 PE=3 SV=1	102.167	21	17	52	16	804	92.4	4.84	166.21	17	0	1	1.65948e+08	1.83606e+08	1.51133e+08	1.85954e+08	1.6627e+08	1.64379e+08	1.49763e+08	1.45436e+08
A0A452E294	Superoxide dismutase	SOD2	Superoxide dismutase OS=Capra hircus OX=9925 GN=SOD2 PE=3 SV=1	102	41	9	133	9	222	24.6	8.75	447.28	9	0	1	8.94066e+08	9.96153e+08	9.30458e+08	8.18743e+08	8.88053e+08	8.50139e+08	9.45999e+08	9.49438e+08
A0A452FUL7	Chaperonin containing TCP1 subunit 6B	CCT6B	Chaperonin containing TCP1 subunit 6B OS=Capra hircus OX=9925 GN=CCT6B PE=3 SV=1	101.992	38	19	70	12	531	58	7.68	218.83	19	7	1	2.48455e+08	2.63067e+08	2.87103e+08	2.57175e+08	2.70496e+08	2.67618e+08	3.14749e+08	3.21492e+08
A0A452EAJ9	Aldehyde dehydrogenase 6 family member A1	ALDH6A1	Aldehyde dehydrogenase 6 family member A1 OS=Capra hircus OX=9925 GN=ALDH6A1 PE=3 SV=1	101.163	36	15	66	15	535	57.9	8.24	214.33	15	0	1	2.36043e+08	2.67638e+08	2.53435e+08	2.53107e+08	2.45286e+08	2.55407e+08	2.60237e+08	2.61292e+08
A0A452FNG3	Solute carrier family 25 member 13	SLC25A13	Solute carrier family 25 member 13 OS=Capra hircus OX=9925 GN=SLC25A13 PE=3 SV=1	101.128	29	15	37	12	666	73.2	8.25	133.78	15	0	1	5.91336e+07	6.39667e+07	6.19561e+07	6.56897e+07	6.33538e+07	6.57865e+07	6.04043e+07	5.98857e+07
A0A452EEA8	Dihydroxyacetone phosphate acyltransferase	GNPAT	Dihydroxyacetone phosphate acyltransferase OS=Capra hircus OX=9925 GN=GNPAT PE=3 SV=1	100.622	27	18	73	18	680	77.7	7.34	228.91	18	0	1	2.92746e+08	3.11695e+08	3.1239e+08	2.892e+08	3.13994e+08	2.90279e+08	3.18461e+08	3.24712e+08
A0A452DQM4	Ferritin	FTMT	Ferritin OS=Capra hircus OX=9925 GN=FTMT PE=3 SV=1	99.613	60	12	82	12	242	27.4	7.33	252.38	12	0	1	3.4273e+08	3.54751e+08	3.68307e+08	4.09345e+08	4.09517e+08	3.66294e+08	3.54635e+08	3.78563e+08
A0A452FE38	H(+)-transporting two-sector ATPase	ATP6V1A	H(+)-transporting two-sector ATPase OS=Capra hircus OX=9925 GN=ATP6V1A PE=3 SV=1	99.382	29	17	60	17	618	68.4	5.58	181.39	17	0	1	2.28136e+08	2.22989e+08	2.32755e+08	2.1457e+08	2.3749e+08	2.39288e+08	2.50259e+08	2.52833e+08
A0A452EU58	Filamin B	FLNB	Filamin B OS=Capra hircus OX=9925 GN=FLNB PE=3 SV=1	99.085	12	26	50	26	2578	275.3	5.78	140.64	26	0	1	1.15157e+08	1.16634e+08	1.15733e+08	9.88613e+07	1.12404e+08	1.21903e+08	1.18865e+08	1.14289e+08
A0A452EZP1	Alpha-mannosidase	MAN2C1	Alpha-mannosidase OS=Capra hircus OX=9925 GN=MAN2C1 PE=3 SV=1	96.574	19	17	54	17	1040	115.6	6.42	161.86	17	0	1	1.69102e+08	1.65554e+08	2.0896e+08	1.84169e+08	1.88205e+08	1.95395e+08	2.54142e+08	2.518e+08
A0A452E757	Prolylcarboxypeptidase	PRCP	Prolylcarboxypeptidase OS=Capra hircus OX=9925 GN=PRCP PE=3 SV=1	96.42	24	10	70	10	511	57.7	6.83	218.76	10	0	1	2.97937e+08	3.06887e+08	2.79106e+08	2.42699e+08	2.89987e+08	3.03929e+08	2.84509e+08	2.72727e+08
A0A452G2S9	Doublecortin domain containing 2C	DCDC2C	Doublecortin domain containing 2C OS=Capra hircus OX=9925 GN=DCDC2C PE=4 SV=1	95.93	44	15	55	15	342	38.8	9.7	182.26	15	0	1	1.74305e+08	1.79271e+08	1.78401e+08	1.48083e+08	1.74743e+08	1.75074e+08	1.7733e+08	1.77316e+08
A0A452EYS8	Prohibitin	PHB2	Prohibitin OS=Capra hircus OX=9925 GN=PHB2 PE=3 SV=1	95.642	54	17	97	17	289	32.3	9.8	307.21	17	0	1	7.02114e+08	7.39928e+08	7.31414e+08	7.57684e+08	7.13025e+08	6.24574e+08	7.34021e+08	7.25275e+08
A0A452DTY2	ADP/ATP translocase	SLC25A5	ADP/ATP translocase OS=Capra hircus OX=9925 GN=SLC25A5 PE=3 SV=1	95.462	47	16	135	3	298	32.9	9.77	363.37	16	2	1	1.68084e+08	1.74951e+08	1.82089e+08	1.71187e+08	1.8098e+08	1.57917e+08	1.94933e+08	1.97462e+08
A0A452G158	CKLF like MARVEL transmembrane domain containing 2	CMTM2	CKLF like MARVEL transmembrane domain containing 2 OS=Capra hircus OX=9925 GN=CMTM2 PE=4 SV=1	95.431	31	11	72	11	248	27.3	9.64	250.14	11	0	1	4.43982e+08	4.54302e+08	4.33157e+08	4.37736e+08	5.20478e+08	5.10041e+08	4.35974e+08	4.67753e+08
A0A452G7D0	POC1 centriolar protein B	POC1B	POC1 centriolar protein B OS=Capra hircus OX=9925 GN=POC1B PE=4 SV=1	95.408	35	17	88	1	473	53.1	7.05	276.43	17	19	1	2.8709e+08	2.72853e+08	2.78502e+08	2.36491e+08	2.9151e+08	2.96327e+08	2.91984e+08	2.72239e+08
A0A452EFT1	Dihydrolipoamide acetyltransferase component of pyruvate dehydrogenase complex	PDHX	Dihydrolipoamide acetyltransferase component of pyruvate dehydrogenase complex OS=Capra hircus OX=9925 GN=PDHX PE=3 SV=1	95.399	27	13	98	13	501	53.9	8.53	299.63	13	0	1	5.75636e+08	6.52106e+08	6.17591e+08	5.68168e+08	6.16392e+08	5.72726e+08	6.14619e+08	6.24874e+08
A0A452DMF8	Keratin 5	KRT5	Keratin 5 OS=Capra hircus OX=9925 GN=KRT5 PE=3 SV=1	95.125	31	21	62	12	561	60.2	8.88	171.73	21	8	1	2.23024e+08	1.91211e+08	2.28704e+08	1.64398e+08	2.43222e+08	3.0566e+08	2.86736e+08	2.27115e+08
A0A452E108	Lysine ketoglutarate reductase	AASS	Lysine ketoglutarate reductase OS=Capra hircus OX=9925 GN=AASS PE=3 SV=1	94.771	20	17	48	17	926	102.2	6.76	128.99	17	0	1	1.05042e+08	1.17205e+08	1.0866e+08	9.99426e+07	1.08952e+08	1.0966e+08	1.08344e+08	1.08976e+08
A0A452G281	Calcium-transporting ATPase	ATP2A2	Calcium-transporting ATPase OS=Capra hircus OX=9925 GN=ATP2A2 PE=3 SV=1	94.753	19	18	34	12	1026	112.7	5.44	111.29	18	9	1	9.06988e+07	8.20555e+07	8.54388e+07	7.31346e+07	8.23935e+07	9.01342e+07	8.85894e+07	8.55153e+07
A0A452DZ50	Actin like 9	ACTL9	Actin like 9 OS=Capra hircus OX=9925 GN=ACTL9 PE=3 SV=1	94.548	36	10	89	10	416	45.5	6.09	275.63	10	0	1	5.93958e+08	6.18081e+08	5.81952e+08	5.2577e+08	6.09159e+08	6.00254e+08	6.10524e+08	5.87901e+08
A0A452G0C9	Carbamoyl-phosphate synthase 1	CPS1	Carbamoyl-phosphate synthase 1 OS=Capra hircus OX=9925 GN=CPS1 PE=3 SV=1	94.45	15	23	55	23	1500	164.7	6.77	158.27	23	0	1	8.40926e+07	1.0173e+08	8.31489e+07	6.22769e+08	6.63524e+07	1.55326e+08	8.10893e+07	8.62482e+07
A0A452EQK9	Cilia and flagella associated protein 65	CFAP65	Cilia and flagella associated protein 65 OS=Capra hircus OX=9925 GN=CFAP65 PE=4 SV=1	94.308	12	21	59	21	1680	190	7.31	165.69	21	0	1	1.99534e+08	2.04502e+08	2.16199e+08	1.81658e+08	2.07752e+08	2.00174e+08	2.13437e+08	2.26866e+08
A0A452E570	Cullin associated and neddylation dissociated 1	CAND1	Cullin associated and neddylation dissociated 1 OS=Capra hircus OX=9925 GN=CAND1 PE=3 SV=1	94.128	17	20	45	20	1230	136.3	5.78	147.39	20	0	1	1.51122e+08	1.60467e+08	1.67394e+08	1.5773e+08	1.65481e+08	1.73282e+08	1.80211e+08	1.86208e+08
A0A452F509	ATP synthase subunit gamma	ATP5F1C	ATP synthase subunit gamma OS=Capra hircus OX=9925 GN=ATP5F1C PE=3 SV=1	94.046	29	9	144	9	298	33.1	9.33	414.11	9	0	1	1.16756e+09	1.23745e+09	1.25695e+09	1.16232e+09	1.22149e+09	1.09345e+09	1.25979e+09	1.24638e+09
A0A452DK85	Pyruvate dehydrogenase E1 component subunit alpha	PDHA1	Pyruvate dehydrogenase E1 component subunit alpha OS=Capra hircus OX=9925 GN=PDHA1 PE=4 SV=1	93.491	34	16	169	8	390	43.4	8.03	466.06	16	0	1	1.30942e+08	1.49974e+08	1.38591e+08	1.24008e+08	1.38214e+08	1.42339e+08	1.41305e+08	1.43527e+08
A0A452DW40	Inorganic diphosphatase	PPA2	Inorganic diphosphatase OS=Capra hircus OX=9925 GN=PPA2 PE=3 SV=1	93.289	46	14	86	3	342	38.7	6.54	278.17	14	12	1	5.80657e+08	6.34394e+08	6.11289e+08	5.4504e+08	5.90688e+08	5.96074e+08	6.28218e+08	6.4572e+08
A0A452DLE1	Glutamate dehydrogenase (NAD(P)(+))	GLUD1	Glutamate dehydrogenase (NAD(P)(+)) OS=Capra hircus OX=9925 GN=GLUD1 PE=3 SV=1	93.094	33	17	75	17	561	61.5	7.96	240.86	17	0	1	2.22951e+08	2.30441e+08	2.34612e+08	2.80929e+08	2.31596e+08	2.37801e+08	2.29992e+08	2.31614e+08
A0A452F6P8	WD repeat domain 64	WDR64	WD repeat domain 64 OS=Capra hircus OX=9925 GN=WDR64 PE=4 SV=1	92.873	21	19	47	3	1037	118.6	7.52	145.98	19	17	1	1.66502e+08	1.69063e+08	1.67473e+08	1.54838e+08	1.62092e+08	1.66972e+08	1.69394e+08	1.75519e+08
A0A452F6Y3	Radial spoke head 3	RSPH3	Radial spoke head 3 OS=Capra hircus OX=9925 GN=RSPH3 PE=3 SV=1	92.849	32	16	58	16	603	68.5	7.47	164.88	16	0	1	2.56521e+08	2.57871e+08	2.62305e+08	2.54593e+08	2.63274e+08	2.54397e+08	2.58381e+08	2.57433e+08
A0A452E8W4	Glycerol-3-phosphate dehydrogenase [NAD(+)]		Glycerol-3-phosphate dehydrogenase [NAD(+)] OS=Capra hircus OX=9925 PE=3 SV=1	92.607	29	13	75	10	351	38.2	5.91	199.98	13	3	1	3.98836e+08	3.90169e+08	4.53124e+08	4.45219e+08	4.65832e+08	4.11628e+08	4.44945e+08	4.74532e+08
A0A452G7C1	POC1 centriolar protein B	POC1B	POC1 centriolar protein B OS=Capra hircus OX=9925 GN=POC1B PE=4 SV=1	91.998	37	17	74	1	451	50.7	7.75	231.07	17	0	1	427605	476306	402726	431871	463300	488122	477661	538832
A0A452DLL2	Testis specific serine kinase 2	TSSK2	Testis specific serine kinase 2 OS=Capra hircus OX=9925 GN=TSSK2 PE=3 SV=1	91.947	38	17	142	17	357	40.7	8.94	404.54	17	0	1	1.38168e+09	1.17734e+09	1.28689e+09	9.70273e+08	1.3302e+09	1.333e+09	1.51579e+09	1.22965e+09
A0A452ETD5	WBP2 N-terminal like	WBP2NL	WBP2 N-terminal like OS=Capra hircus OX=9925 GN=WBP2NL PE=4 SV=1	91.749	26	10	94	10	357	36.1	6.67	299.23	10	0	1	1.05918e+09	1.1091e+09	1.07044e+09	9.51488e+08	1.04274e+09	1.01997e+09	1.08069e+09	1.09483e+09
A0A452FYF6	GTP:AMP phosphotransferase AK3, mitochondrial	AK3	GTP:AMP phosphotransferase AK3, mitochondrial OS=Capra hircus OX=9925 GN=AK3 PE=3 SV=1	91.272	51	12	81	12	227	25.7	9.04	255.14	12	0	1	3.74794e+08	3.77725e+08	4.02384e+08	4.58851e+08	4.46027e+08	3.57738e+08	3.75464e+08	4.12537e+08
A0A452FD38	TNF receptor associated protein 1	TRAP1	TNF receptor associated protein 1 OS=Capra hircus OX=9925 GN=TRAP1 PE=3 SV=1	91.035	28	18	54	17	703	79.3	7.14	169.09	18	0	1	1.2964e+08	1.32057e+08	1.30458e+08	1.24991e+08	1.33683e+08	1.40313e+08	1.4203e+08	1.33487e+08
A0A452EIY7	NADH:ubiquinone oxidoreductase subunit A9	NDUFA9	NADH:ubiquinone oxidoreductase subunit A9 OS=Capra hircus OX=9925 GN=NDUFA9 PE=4 SV=1	91.012	41	13	60	13	382	43.2	9.39	188.47	13	0	1	2.84873e+08	2.80041e+08	3.00999e+08	3.11435e+08	2.9295e+08	2.73584e+08	3.1625e+08	3.42329e+08
A0A452FTX1	Chromosome 27 C4orf47 homolog	C4orf47	Chromosome 27 C4orf47 homolog OS=Capra hircus OX=9925 GN=C4orf47 PE=3 SV=1	90.769	56	16	53	16	309	34.3	9.67	147.02	16	0	1	2.79771e+08	2.87933e+08	2.97485e+08	3.02163e+08	2.93431e+08	2.77008e+08	2.9712e+08	2.99968e+08
A0A452EW94	Electron transfer flavoprotein subunit beta	ETFB	Electron transfer flavoprotein subunit beta OS=Capra hircus OX=9925 GN=ETFB PE=3 SV=1	90.689	56	13	98	13	255	27.7	8.12	342.44	13	0	1	7.07755e+08	7.5741e+08	8.07415e+08	8.75954e+08	8.93948e+08	7.23843e+08	7.88546e+08	8.96799e+08
A0A452DRT4	Nucleoporin 205	NUP205	Nucleoporin 205 OS=Capra hircus OX=9925 GN=NUP205 PE=3 SV=1	90.398	11	23	49	23	2003	226.6	6.27	140.52	23	0	1	1.58904e+08	1.72359e+08	1.6912e+08	1.49686e+08	1.62535e+08	1.66536e+08	1.65983e+08	1.67668e+08
A0A452EUT5	Cilia and flagella associated protein 94	CFAP94	Cilia and flagella associated protein 94 OS=Capra hircus OX=9925 GN=CFAP94 PE=3 SV=1	90.389	19	12	40	12	728	84.7	5.2	136.7	12	0	1	1.24762e+08	1.37287e+08	1.30589e+08	1.15839e+08	1.30953e+08	1.329e+08	1.32449e+08	1.36299e+08
A0A452EZG6	Serine/threonine-protein phosphatase with EF-hands	PPEF1	Serine/threonine-protein phosphatase with EF-hands OS=Capra hircus OX=9925 GN=PPEF1 PE=3 SV=1	90.179	29	18	61	18	658	76.1	7.58	186.09	18	0	1	2.45054e+08	2.62238e+08	2.58032e+08	2.29055e+08	2.53067e+08	2.56349e+08	2.58188e+08	2.55252e+08
A0A452EDM2	Mitochondrial carrier 2	MTCH2	Mitochondrial carrier 2 OS=Capra hircus OX=9925 GN=MTCH2 PE=3 SV=1	90.082	29	10	122	3	303	33.2	8.05	434.04	10	8	1	1.33758e+09	1.45017e+09	1.53673e+09	1.25105e+09	1.48789e+09	1.35363e+09	1.65827e+09	1.65662e+09
A0A452G5E3	ATP synthase subunit d, mitochondrial	ATP5PD	ATP synthase subunit d, mitochondrial OS=Capra hircus OX=9925 GN=ATP5PD PE=3 SV=1	89.688	67	10	71	8	162	18.8	6.24	212.36	10	3	1	3.21515e+08	3.879e+08	3.8757e+08	4.7359e+08	4.68742e+08	3.13068e+08	3.93105e+08	4.77751e+08
A0A452G617	Cytochrome c 2	LOC106501717	Cytochrome c 2 OS=Capra hircus OX=9925 GN=LOC106501717 PE=3 SV=1	89.574	55	9	57	7	105	11.7	9.44	198.86	9	2	1	6.13161e+08	5.58802e+08	5.7188e+08	6.31312e+08	6.36696e+08	5.60219e+08	5.24741e+08	5.06171e+08
A0A452G0D1	Coiled-coil domain-containing protein 135	DRC7	Coiled-coil domain-containing protein 135 OS=Capra hircus OX=9925 GN=DRC7 PE=3 SV=1	89.113	25	22	61	22	891	105.3	5.57	181.08	22	0	1	1.474e+08	1.50217e+08	1.50653e+08	1.43382e+08	1.54247e+08	1.55485e+08	1.52212e+08	1.53345e+08
A0A452DPX9	WD repeat domain 78	DNAI4	WD repeat domain 78 OS=Capra hircus OX=9925 GN=DNAI4 PE=4 SV=1	88.985	31	21	46	21	816	91.1	5.91	146.91	21	0	1	1.50769e+08	1.56873e+08	1.56141e+08	1.4487e+08	1.51674e+08	1.55521e+08	1.55753e+08	1.57032e+08
A0A452FBH0	Basigin	BSG	Basigin OS=Capra hircus OX=9925 GN=BSG PE=4 SV=1	88.977	30	10	93	10	269	29.5	6.16	287.11	10	0	1	5.20802e+08	5.40682e+08	5.18349e+08	4.83827e+08	5.22545e+08	4.69784e+08	5.15289e+08	4.94424e+08
A0A452F6G1	Phospholipid-transporting ATPase	LOC102190971	Phospholipid-transporting ATPase OS=Capra hircus OX=9925 GN=LOC102190971 PE=3 SV=1	88.905	17	21	69	20	1148	130.2	7.94	193.65	21	1	1	2.13086e+08	2.23126e+08	2.16158e+08	2.00244e+08	2.2141e+08	2.24491e+08	2.15207e+08	2.16594e+08
A0A452DLQ9	Enoyl-CoA hydratase, short chain 1	ECHS1	Enoyl-CoA hydratase, short chain 1 OS=Capra hircus OX=9925 GN=ECHS1 PE=3 SV=1	88.826	43	12	70	12	290	31.1	8.13	216.43	12	0	1	8.86384e+08	8.97305e+08	9.13681e+08	7.81915e+08	8.92074e+08	8.72309e+08	9.36834e+08	8.91809e+08
A0A452FMD2	Cilia and flagella associated protein 61	CFAP61	Cilia and flagella associated protein 61 OS=Capra hircus OX=9925 GN=CFAP61 PE=4 SV=1	88.559	13	15	53	15	1243	142.1	6.76	155.87	15	0	1	1.57359e+08	1.43236e+08	1.58358e+08	1.26858e+08	1.49964e+08	1.59493e+08	1.58808e+08	1.57115e+08
A0A452DPZ6	Peptidylprolyl isomerase like 6	PPIL6	Peptidylprolyl isomerase like 6 OS=Capra hircus OX=9925 GN=PPIL6 PE=4 SV=1	88.319	35	8	41	8	307	34.7	6.79	131.15	8	0	1	1.15893e+08	1.28498e+08	1.21318e+08	1.06554e+08	1.18327e+08	1.2133e+08	1.21654e+08	1.20789e+08
A0A452DNS4	WD repeat domain 66	CFAP251	WD repeat domain 66 OS=Capra hircus OX=9925 GN=CFAP251 PE=4 SV=1	87.647	15	17	55	17	1149	130.2	4.82	145	17	0	1	1.77629e+08	1.8648e+08	1.83749e+08	1.6307e+08	1.89674e+08	1.84979e+08	1.85653e+08	1.86205e+08
A0A452DP64	Glutathione-dependent dehydroascorbate reductase	GSTO2	Glutathione-dependent dehydroascorbate reductase OS=Capra hircus OX=9925 GN=GSTO2 PE=3 SV=1	87.605	43	11	163	11	244	28.3	7.53	540.02	11	0	1	1.14295e+09	9.4543e+08	1.05701e+09	8.33519e+08	1.12878e+09	1.02858e+09	1.27519e+09	9.79244e+08
A0A452E2H1	ATP synthase peripheral stalk subunit OSCP	ATP5PO	ATP synthase peripheral stalk subunit OSCP OS=Capra hircus OX=9925 GN=ATP5PO PE=3 SV=1	87.526	49	8	50	8	196	21.4	9.7	145.3	8	0	1	1.84522e+08	1.98872e+08	2.096e+08	2.34919e+08	2.23517e+08	1.90594e+08	1.98839e+08	2.26603e+08
A0A452FL34	Glutamine rich 2	QRICH2	Glutamine rich 2 OS=Capra hircus OX=9925 GN=QRICH2 PE=4 SV=1	87.313	29	17	63	17	572	63.8	6.86	190.45	17	0	1	2.28352e+08	2.37797e+08	2.27236e+08	2.1064e+08	2.09834e+08	2.2526e+08	2.22035e+08	2.27473e+08
A0A452DU24	Sperm associated antigen 8	SPAG8	Sperm associated antigen 8 OS=Capra hircus OX=9925 GN=SPAG8 PE=4 SV=1	86.926	56	17	63	17	368	38.7	8.13	172.82	17	0	1	3.2957e+08	3.60074e+08	3.64188e+08	3.33107e+08	3.50092e+08	3.68643e+08	3.65054e+08	3.87726e+08
A0A452E5W0	Oxysterol-binding protein	OSBP2	Oxysterol-binding protein OS=Capra hircus OX=9925 GN=OSBP2 PE=3 SV=1	86.69	21	17	46	17	904	100.8	6.7	131.05	17	0	1	1.28228e+08	1.34596e+08	1.29422e+08	1.32261e+08	1.25637e+08	1.30379e+08	1.33428e+08	1.35931e+08
A0A452ELE4	NADH dehydrogenase [ubiquinone] 1 alpha subcomplex subunit 10, mitochondrial	NDUFA10	NADH dehydrogenase [ubiquinone] 1 alpha subcomplex subunit 10, mitochondrial OS=Capra hircus OX=9925 GN=NDUFA10 PE=3 SV=1	86.076	42	16	97	16	355	40.3	7.53	282.48	16	0	1	6.73206e+08	7.29666e+08	7.00996e+08	6.40681e+08	6.60046e+08	6.63604e+08	7.07634e+08	7.15675e+08
A0A452FDQ6	Centrosomal protein 135	CEP135	Centrosomal protein 135 OS=Capra hircus OX=9925 GN=CEP135 PE=4 SV=1	86.066	23	27	50	27	1113	130.5	6.55	130.25	27	0	1	1.57216e+08	1.53257e+08	1.4996e+08	1.42218e+08	1.55627e+08	1.78047e+08	1.54725e+08	1.41152e+08
A0A452FXF1	Complex I-49kD	NDUFS2	Complex I-49kD OS=Capra hircus OX=9925 GN=NDUFS2 PE=3 SV=1	85.665	39	13	53	13	463	52.5	7.15	150.38	13	0	1	2.34811e+08	2.40927e+08	2.50491e+08	2.23976e+08	2.43036e+08	2.41381e+08	2.55171e+08	2.53146e+08
A0A452FJ99	Dynein regulatory complex subunit 4	GAS8	Dynein regulatory complex subunit 4 OS=Capra hircus OX=9925 GN=GAS8 PE=3 SV=1	84.862	36	18	49	18	478	56.2	8.54	149.24	18	0	1	1.3321e+08	1.27864e+08	1.34083e+08	1.51367e+08	1.49462e+08	1.60804e+08	1.24716e+08	1.30076e+08
A0A452ER37	26S proteasome AAA-ATPase subunit RPT1	PSMC2	26S proteasome AAA-ATPase subunit RPT1 OS=Capra hircus OX=9925 GN=PSMC2 PE=3 SV=1	84.747	36	15	29	15	433	48.6	5.95	103.53	15	0	1	9.16948e+07	9.82869e+07	1.01561e+08	9.57934e+07	9.04727e+07	1.01795e+08	1.0989e+08	1.14462e+08
A0A452E1S9	Dynein light chain	DYNLL2	Dynein light chain OS=Capra hircus OX=9925 GN=DYNLL2 PE=3 SV=1	84.694	57	4	83	2	89	10.3	7.37	295.26	4	3	1	1.27913e+09	1.49283e+09	1.56115e+09	1.94819e+09	1.8095e+09	1.77531e+09	1.5607e+09	1.83392e+09
A0A452F6J7	Keratin, type I cytoskeletal 15	KRT15	Keratin, type I cytoskeletal 15 OS=Capra hircus OX=9925 GN=KRT15 PE=3 SV=1	84.564	38	19	50	8	453	48.8	4.81	142.91	19	0	1	4.52683e+07	4.43256e+07	4.49845e+07	4.07861e+07	4.89006e+07	4.71852e+07	4.61278e+07	4.55225e+07
A0A452DKW7	Coiled-coil domain containing 116	CCDC116	Coiled-coil domain containing 116 OS=Capra hircus OX=9925 GN=CCDC116 PE=4 SV=1	84.541	28	11	44	11	542	59	9.76	155.13	11	0	1	1.6188e+08	1.62499e+08	1.6293e+08	1.41644e+08	1.69485e+08	1.71565e+08	1.64124e+08	1.67006e+08
A0A452E8J9	Acyl-CoA dehydrogenase family member 8	ACAD8	Acyl-CoA dehydrogenase family member 8 OS=Capra hircus OX=9925 GN=ACAD8 PE=3 SV=1	84.202	37	13	66	13	415	45	8.18	186.37	13	0	1	2.93145e+08	2.92763e+08	2.82685e+08	2.48015e+08	2.97726e+08	3.10046e+08	2.84365e+08	2.81293e+08
A0A452EZI1	Nucleoporin 188	NUP188	Nucleoporin 188 OS=Capra hircus OX=9925 GN=NUP188 PE=4 SV=1	84.17	11	18	38	18	1751	196.5	6.84	118.54	18	0	1	9.28705e+07	9.5095e+07	9.82968e+07	8.50889e+07	9.5288e+07	9.56122e+07	9.60781e+07	1.00359e+08
A0A452FQ64	Hydroxyacylglutathione hydrolase	HAGH	Hydroxyacylglutathione hydrolase OS=Capra hircus OX=9925 GN=HAGH PE=3 SV=1	83.401	31	8	83	8	308	33.9	7.83	252.65	8	0	1	2.1317e+08	2.16789e+08	2.11506e+08	1.93527e+08	2.20678e+08	2.14423e+08	2.07941e+08	2.0553e+08
A0A452EB34	ADP/ATP translocase	SLC25A6	ADP/ATP translocase OS=Capra hircus OX=9925 GN=SLC25A6 PE=3 SV=1	83.384	47	17	133	6	298	32.8	9.76	331.22	17	10	1	9.7356e+08	9.60296e+08	1.01146e+09	1.02717e+09	1.01471e+09	8.97459e+08	1.0513e+09	1.07616e+09
A0A452F123	Translocase of outer mitochondrial membrane 34	TOMM34	Translocase of outer mitochondrial membrane 34 OS=Capra hircus OX=9925 GN=TOMM34 PE=4 SV=1	83.333	43	16	51	16	309	34.8	8.6	161.12	16	0	1	2.35463e+08	1.97471e+08	2.06537e+08	1.57301e+08	2.41065e+08	1.99781e+08	2.66596e+08	1.99621e+08
A0A452G1X4	Phospholipase B-like	PLBD2	Phospholipase B-like OS=Capra hircus OX=9925 GN=PLBD2 PE=3 SV=1	83.018	27	15	46	15	589	65.5	7.72	152.57	15	0	1	2.02245e+08	1.97723e+08	2.1317e+08	2.02075e+08	2.05691e+08	1.98672e+08	2.08231e+08	2.10218e+08
A0A452E1D2	Nucleoside diphosphate kinase 7	NME7	Nucleoside diphosphate kinase 7 OS=Capra hircus OX=9925 GN=NME7 PE=3 SV=1	82.963	42	14	52	14	377	42.6	6.11	169.53	14	0	1	5.22713e+08	5.45203e+08	5.80578e+08	5.08428e+08	5.40061e+08	5.74408e+08	5.99094e+08	6.26647e+08
A0A452FJS0	Disintegrin and metalloproteinase domain-containing protein 1a-like	LOC102177554	Disintegrin and metalloproteinase domain-containing protein 1a-like OS=Capra hircus OX=9925 GN=LOC102177554 PE=4 SV=1	82.533	12	12	120	12	798	88	5.19	312.55	12	0	1	1.42979e+09	1.44069e+09	1.3175e+09	1.40456e+09	1.3699e+09	1.2395e+09	1.3709e+09	1.3357e+09
A0A452FTZ9	Protein phosphatase 2 scaffold subunit Aalpha	PPP2R1A	Protein phosphatase 2 scaffold subunit Aalpha OS=Capra hircus OX=9925 GN=PPP2R1A PE=4 SV=1	81.884	32	15	43	11	589	65.2	5.11	132.48	15	5	1	1.76766e+08	1.71743e+08	1.78606e+08	1.69931e+08	1.84993e+08	1.7306e+08	1.99389e+08	1.79028e+08
A0A452FHH2	Propionyl-CoA carboxylase subunit beta	PCCB	Propionyl-CoA carboxylase subunit beta OS=Capra hircus OX=9925 GN=PCCB PE=4 SV=1	81.604	35	15	36	15	552	60	8	115.85	15	0	1	1.12909e+08	1.19765e+08	1.16377e+08	1.03204e+08	1.13284e+08	1.18948e+08	1.20991e+08	1.20207e+08
A0A452E206	Coiled-coil domain containing 96	CCDC96	Coiled-coil domain containing 96 OS=Capra hircus OX=9925 GN=CCDC96 PE=4 SV=1	81.472	28	18	58	18	549	61.9	4.93	167.79	18	0	1	1.89244e+08	2.04775e+08	1.93972e+08	1.75878e+08	2.03436e+08	1.92811e+08	1.89148e+08	1.9618e+08
A0A452GAY2	[Tau protein] kinase	GSK3A	[Tau protein] kinase OS=Capra hircus OX=9925 GN=GSK3A PE=3 SV=1	81.468	26	9	46	6	483	50.9	8.75	148.17	9	0	1	1.37584e+08	1.32879e+08	1.38e+08	1.26276e+08	1.40991e+08	1.41303e+08	1.42825e+08	1.44304e+08
A0A452DV87	Immunity related GTPase cinema	IRGC	Immunity related GTPase cinema OS=Capra hircus OX=9925 GN=IRGC PE=3 SV=1	81.266	32	13	47	13	466	50.8	5.39	152.2	13	0	1	1.0552e+08	1.0435e+08	1.06083e+08	1.0437e+08	1.04089e+08	9.95016e+07	1.07213e+08	1.10491e+08
A0A452EL53			Uncharacterized protein OS=Capra hircus OX=9925 PE=4 SV=1	81.16	25	6	58	1	289	31.7	7.37	166.95	6	0	1	1.63766e+06	1.32202e+06	1.25959e+06	1.35279e+06	1.67447e+06	1.58387e+06	1.206e+06	1.03525e+06
A0A452EUE1	Multifunctional fusion protein	ALDH4A1	Multifunctional fusion protein OS=Capra hircus OX=9925 GN=ALDH4A1 PE=3 SV=1	80.958	27	14	39	14	563	61.4	8	140.96	14	0	1	1.12925e+08	1.19634e+08	1.10961e+08	1.17523e+08	1.06988e+08	1.17856e+08	1.1026e+08	1.12432e+08
A0A452F1S0	Complex I-30kD	NDUFS3	Complex I-30kD OS=Capra hircus OX=9925 GN=NDUFS3 PE=3 SV=1	80.725	44	10	60	10	266	30.4	7.46	177.56	10	0	1	5.27872e+08	5.36695e+08	5.47953e+08	5.05221e+08	5.59138e+08	4.77422e+08	5.67759e+08	5.51281e+08
A0A452G326			Uncharacterized protein OS=Capra hircus OX=9925 PE=3 SV=1	80.546	30	19	68	19	615	71.4	8.5	176.02	19	0	1	2.32824e+08	2.2288e+08	2.38287e+08	2.17681e+08	2.35002e+08	2.52256e+08	2.33988e+08	2.46022e+08
A0A452G538	Clathrin heavy chain	CLTC	Clathrin heavy chain OS=Capra hircus OX=9925 GN=CLTC PE=3 SV=1	80.403	12	17	47	17	1682	192.3	5.69	130.69	17	0	1	9.69355e+07	1.0097e+08	1.02932e+08	1.04317e+08	1.05204e+08	1.0173e+08	1.03702e+08	1.04051e+08
A0A452FS81	Methylmalonyl-CoA isomerase	MMUT	Methylmalonyl-CoA isomerase OS=Capra hircus OX=9925 GN=MMUT PE=3 SV=1	80.16	21	14	45	14	771	85.4	7.36	139.99	14	0	1	1.03174e+08	1.10687e+08	1.07496e+08	1.04211e+08	1.06591e+08	1.10403e+08	1.09678e+08	1.09807e+08
A0A452GAN7	Coiled-coil domain containing 146	CCDC146	Coiled-coil domain containing 146 OS=Capra hircus OX=9925 GN=CCDC146 PE=4 SV=1	79.242	22	23	44	23	956	113.1	8.12	126.07	23	0	1	1.70422e+08	1.78597e+08	1.77252e+08	1.70567e+08	1.77689e+08	1.78722e+08	1.72404e+08	1.80477e+08
A0A452DZ43	Fructose-bisphosphate aldolase	ALDOC	Fructose-bisphosphate aldolase OS=Capra hircus OX=9925 GN=ALDOC PE=3 SV=1	79.12	31	12	96	6	364	39.4	6.65	336.21	12	1	1	2.53711e+08	2.79709e+08	2.76934e+08	3.01576e+08	2.63554e+08	2.80775e+08	2.82384e+08	2.87781e+08
A0A452FH33	Dynein axonemal heavy chain 5	DNAH5	Dynein axonemal heavy chain 5 OS=Capra hircus OX=9925 GN=DNAH5 PE=3 SV=1	78.721	2	12	94	1	4619	528.8	5.99	288.57	12	0	1	4.24167e+06	4.68467e+06	4.75485e+06	4.78369e+06	4.77121e+06	4.69333e+06	4.87311e+06	5.27391e+06
A0A452DZE0	Betaine--homocysteine S-methyltransferase 1	BHMT	Betaine--homocysteine S-methyltransferase 1 OS=Capra hircus OX=9925 GN=BHMT PE=4 SV=1	78.691	37	12	64	12	403	44.6	7.03	198.39	12	0	1	2.57756e+08	2.57454e+08	2.7041e+08	3.42947e+08	2.67659e+08	2.71947e+08	2.85919e+08	2.90262e+08
A0A452F5K7	Cysteinyl-tRNA synthetase	CARS2	Cysteinyl-tRNA synthetase OS=Capra hircus OX=9925 GN=CARS2 PE=3 SV=1	78.649	28	12	30	12	555	61.1	8.48	106.17	12	0	1	5.67108e+07	6.1595e+07	5.70037e+07	5.7125e+07	5.84165e+07	5.79624e+07	5.66799e+07	5.53317e+07
A0A452EPY9	Abhydrolase domain containing 10	ABHD10	Abhydrolase domain containing 10 OS=Capra hircus OX=9925 GN=ABHD10 PE=4 SV=1	78.62	52	11	45	11	306	34.1	8.72	128.59	11	0	1	2.19877e+08	2.27339e+08	2.33331e+08	2.25266e+08	2.38218e+08	2.08208e+08	2.32496e+08	2.40414e+08
A0A452EI86	Spermatogenesis-associated protein 20	SPATA20	Spermatogenesis-associated protein 20 OS=Capra hircus OX=9925 GN=SPATA20 PE=4 SV=1	78.546	25	18	39	18	811	90.5	7.58	111.6	18	0	1	1.37808e+08	1.6036e+08	1.38429e+08	1.32478e+08	1.20739e+08	1.43335e+08	1.48974e+08	1.53209e+08
A0A452EJJ6	Serine/threonine-protein phosphatase	PPP1CB	Serine/threonine-protein phosphatase OS=Capra hircus OX=9925 GN=PPP1CB PE=3 SV=1	78.52	37	10	88	3	326	37.2	7.21	325.9	10	0	1	2.71578e+07	2.40248e+07	2.58852e+07	2.41184e+07	2.67388e+07	2.53214e+07	2.73907e+07	2.46449e+07
A0A452EA99	Calcium/calmodulin dependent protein kinase IV	CAMK4	Calcium/calmodulin dependent protein kinase IV OS=Capra hircus OX=9925 GN=CAMK4 PE=3 SV=1	78.336	37	16	54	15	464	50	5.02	146.2	16	1	1	2.7702e+08	2.8509e+08	2.88669e+08	2.65825e+08	2.83149e+08	2.81056e+08	2.95656e+08	2.99144e+08
A0A452EYJ1	Phosphatidylethanolamine-binding protein 1	PEBP1	Phosphatidylethanolamine-binding protein 1 OS=Capra hircus OX=9925 GN=PEBP1 PE=3 SV=1	78.304	64	9	45	9	187	21	7.49	159.19	9	0	1	3.43501e+08	3.44187e+08	3.37815e+08	3.24488e+08	3.18611e+08	3.35748e+08	3.41918e+08	3.54624e+08
A0A452EV01	Fibrous sheath CABYR binding protein	FSCB	Fibrous sheath CABYR binding protein OS=Capra hircus OX=9925 GN=FSCB PE=4 SV=1	78.24	15	15	82	15	898	96.5	3.97	247.57	15	0	1	8.73125e+08	8.38766e+08	7.66497e+08	6.46804e+08	8.62671e+08	7.68509e+08	7.36089e+08	6.76925e+08
A0A452EIZ6	FAM161 centrosomal protein A	FAM161A	FAM161 centrosomal protein A OS=Capra hircus OX=9925 GN=FAM161A PE=3 SV=1	78.123	20	14	61	14	608	71.5	9.26	163.35	14	0	1	2.80713e+08	2.78177e+08	2.51182e+08	2.28373e+08	2.96049e+08	2.85527e+08	2.72449e+08	2.38393e+08
A0A452FL16	Testis expressed 33	TEX33	Testis expressed 33 OS=Capra hircus OX=9925 GN=TEX33 PE=4 SV=1	77.8	46	12	45	12	272	30.4	9.55	143	12	0	1	1.05111e+08	1.2147e+08	1.10459e+08	1.13262e+08	1.10458e+08	1.02866e+08	1.0442e+08	1.09925e+08
A0A452ED07	Aspartyl aminopeptidase	DNPEP	Aspartyl aminopeptidase OS=Capra hircus OX=9925 GN=DNPEP PE=3 SV=1	77.779	22	10	39	10	475	52.3	6.92	116.42	10	0	1	1.20964e+08	1.25817e+08	1.31881e+08	1.13186e+08	1.26989e+08	1.28769e+08	1.41641e+08	1.4116e+08
A0A452FVP5	Dpy-19 like 2	DPY19L2	Dpy-19 like 2 OS=Capra hircus OX=9925 GN=DPY19L2 PE=3 SV=1	77.735	15	10	40	10	799	92.8	9.55	131.59	10	0	1	2.48583e+08	2.3634e+08	2.16732e+08	1.82104e+08	2.36087e+08	2.41519e+08	2.41747e+08	1.89378e+08
A0A452EXC9	Vacuolar proton pump subunit B	ATP6V1B2	Vacuolar proton pump subunit B OS=Capra hircus OX=9925 GN=ATP6V1B2 PE=3 SV=1	77.556	30	13	36	13	511	56.5	5.81	117.2	13	0	1	2.33324e+08	2.46285e+08	2.26446e+08	2.12983e+08	2.081e+08	2.75368e+08	2.20966e+08	2.27201e+08
A0A452FN18	Keratin 3	KRT3	Keratin 3 OS=Capra hircus OX=9925 GN=KRT3 PE=3 SV=1	77.34	15	13	60	3	629	64.2	8.38	164.02	13	0	1	2.86936e+07	2.69327e+07	3.25231e+07	2.23962e+07	3.44352e+07	3.81755e+07	3.67466e+07	3.298e+07
A0A452EKJ3	Ornithine--oxo-acid aminotransferase	OAT	Ornithine--oxo-acid aminotransferase OS=Capra hircus OX=9925 GN=OAT PE=3 SV=1	77.306	36	12	27	12	439	48.1	6.7	96.84	12	0	1	9.70962e+07	1.02993e+08	1.02286e+08	9.14693e+07	1.00928e+08	1.00779e+08	1.01946e+08	1.03868e+08
A0A452G731	Nucleoside-diphosphate kinase	AK8	Nucleoside-diphosphate kinase OS=Capra hircus OX=9925 GN=AK8 PE=3 SV=1	77.202	30	13	47	13	479	54.8	6.73	127.04	13	0	1	1.64796e+08	1.68816e+08	1.70945e+08	1.74186e+08	1.70007e+08	1.55766e+08	1.6796e+08	1.78247e+08
A0A452FB11	Proteasome subunit alpha type	PSMA1	Proteasome subunit alpha type OS=Capra hircus OX=9925 GN=PSMA1 PE=3 SV=1	77.085	37	10	33	10	263	29.6	6.61	111.49	10	0	1	2.32511e+08	2.25542e+08	2.47182e+08	2.25464e+08	2.19102e+08	2.23741e+08	2.70043e+08	2.7119e+08
A0A452FYB3	Keratin 19	KRT19	Keratin 19 OS=Capra hircus OX=9925 GN=KRT19 PE=3 SV=1	76.905	42	18	40	11	399	43.9	5.01	112.18	18	3	1	9.55675e+07	9.54365e+07	9.41107e+07	8.4522e+07	1.03291e+08	1.03412e+08	1.47762e+08	8.5296e+07
A0A452FAL7	Fumarylacetoacetate hydrolase domain-containing protein 2	FAHD2A	Fumarylacetoacetate hydrolase domain-containing protein 2 OS=Capra hircus OX=9925 GN=FAHD2A PE=3 SV=1	76.759	40	10	49	10	318	35.1	7.01	135.68	10	0	1	1.63193e+08	2.10283e+08	1.77478e+08	1.81899e+08	1.86388e+08	1.81272e+08	1.66426e+08	1.83565e+08
A0A452EA31	Dynein light chain roadblock	DYNLRB2	Dynein light chain roadblock OS=Capra hircus OX=9925 GN=DYNLRB2 PE=3 SV=1	76.165	61	5	25	5	97	10.9	7.44	87.3	5	0	1	9.63646e+07	1.11221e+08	1.05384e+08	1.03805e+08	1.08774e+08	9.58515e+07	1.03471e+08	1.08196e+08
A0A452EEG7	Cytochrome c oxidase subunit 4	LOC102188434	Cytochrome c oxidase subunit 4 OS=Capra hircus OX=9925 GN=LOC102188434 PE=3 SV=1	76.092	57	11	222	10	169	19.5	9.31	636.53	11	2	1	3.49921e+09	3.89744e+09	4.06457e+09	4.22289e+09	4.2362e+09	3.10835e+09	3.82734e+09	4.14564e+09
A0A452EQW7	Malate dehydrogenase	MDH1	Malate dehydrogenase OS=Capra hircus OX=9925 GN=MDH1 PE=3 SV=1	76.085	33	12	48	12	334	36.4	6.58	148.67	12	0	1	1.76051e+08	1.80618e+08	1.84083e+08	1.92666e+08	1.72332e+08	1.85562e+08	1.89635e+08	1.91821e+08
A0A452G0T2	Coiled-coil domain containing 159	CCDC159	Coiled-coil domain containing 159 OS=Capra hircus OX=9925 GN=CCDC159 PE=4 SV=1	75.944	33	11	34	11	342	38.9	6.02	128.9	11	0	1	9.55665e+07	7.73172e+07	7.6204e+07	6.10445e+07	8.14516e+07	1.15523e+08	9.73488e+07	7.13879e+07
A0A452G117	NADH dehydrogenase [ubiquinone] iron-sulfur protein 4, mitochondrial	NDUFS4	NADH dehydrogenase [ubiquinone] iron-sulfur protein 4, mitochondrial OS=Capra hircus OX=9925 GN=NDUFS4 PE=3 SV=1	75.733	37	6	80	6	175	19.8	10.14	251.66	6	0	1	2.79475e+08	2.91944e+08	2.78404e+08	2.54668e+08	2.7375e+08	2.50873e+08	2.81744e+08	2.70667e+08
A0A452FZC4	Rhophilin associated tail protein 1 like	ROPN1L	Rhophilin associated tail protein 1 like OS=Capra hircus OX=9925 GN=ROPN1L PE=4 SV=1	75.651	45	9	51	9	218	24.4	6.54	147.4	9	0	1	2.78039e+08	2.81276e+08	3.05082e+08	3.63392e+08	3.44733e+08	2.91296e+08	3.05143e+08	3.46391e+08
A0A452F8J5	Dynein light chain	DYNLL1	Dynein light chain OS=Capra hircus OX=9925 GN=DYNLL1 PE=3 SV=1	75.458	57	4	40	2	89	10.4	7.4	160.04	4	0	1	1.0451e+08	1.13213e+08	1.18447e+08	1.58934e+08	1.44651e+08	1.46884e+08	1.20378e+08	1.45038e+08
A0A452EW59	Pyruvate dehydrogenase phosphatase regulatory subunit, mitochondrial	PDPR	Pyruvate dehydrogenase phosphatase regulatory subunit, mitochondrial OS=Capra hircus OX=9925 GN=PDPR PE=3 SV=1	75.407	22	19	34	19	878	98.5	6.93	102.05	19	0	1	1.26027e+08	1.27284e+08	1.28075e+08	1.11062e+08	1.25462e+08	1.3574e+08	1.26693e+08	1.30581e+08
A0A452FAP2	DnaJ heat shock protein family (Hsp40) member C11	DNAJC11	DnaJ heat shock protein family (Hsp40) member C11 OS=Capra hircus OX=9925 GN=DNAJC11 PE=4 SV=1	75.372	30	15	34	15	559	63.2	8.32	99.2	15	0	1	1.67157e+08	1.7473e+08	1.69503e+08	1.4944e+08	1.656e+08	1.76267e+08	1.76762e+08	1.77423e+08
A0A452FIG1	IQ motif and ubiquitin domain containing	IQUB	IQ motif and ubiquitin domain containing OS=Capra hircus OX=9925 GN=IQUB PE=4 SV=1	75.033	25	21	56	21	792	91.8	7.12	150.21	21	0	1	2.71653e+08	2.82697e+08	2.8839e+08	2.58433e+08	2.83629e+08	2.80129e+08	3.04941e+08	2.98832e+08
A0A452DWX3	CDGSH iron-sulfur domain-containing protein 1 pseudogene	LOC108636844	CDGSH iron-sulfur domain-containing protein 1 pseudogene OS=Capra hircus OX=9925 GN=LOC108636844 PE=4 SV=1	74.977	45	5	58	5	106	11.9	8.85	190.34	5	0	1	2.77469e+08	2.8143e+08	2.82283e+08	2.91123e+08	2.93798e+08	2.77039e+08	2.86292e+08	2.90645e+08
A0A452F3B7	IQ motif containing with AAA domain 1 like	IQCA1L	IQ motif containing with AAA domain 1 like OS=Capra hircus OX=9925 GN=IQCA1L PE=4 SV=1	74.689	23	16	30	16	817	94.5	9.13	76.57	16	0	1	1.07995e+08	1.09181e+08	1.08365e+08	1.03569e+08	1.00754e+08	1.11963e+08	1.05873e+08	1.09745e+08
A0A452E0R5	Coiled-coil domain containing 65	CCDC65	Coiled-coil domain containing 65 OS=Capra hircus OX=9925 GN=CCDC65 PE=4 SV=1	74.195	30	16	50	16	498	58.7	6.27	141.78	16	0	1	1.7455e+08	1.79432e+08	1.81498e+08	1.87491e+08	1.99635e+08	1.86108e+08	1.75918e+08	1.8284e+08
A0A452EME5	NME/NM23 family member 5	NME5	NME/NM23 family member 5 OS=Capra hircus OX=9925 GN=NME5 PE=3 SV=1	74.182	49	8	34	8	209	23.7	6.79	105.62	8	0	1	1.68256e+08	1.7013e+08	1.89368e+08	1.96e+08	1.96317e+08	1.64909e+08	1.84422e+08	2.05331e+08
A0A452EDR2	Spermatogenesis and centriole associated 1	SPATC1	Spermatogenesis and centriole associated 1 OS=Capra hircus OX=9925 GN=SPATC1 PE=4 SV=1	74.038	26	12	86	12	476	50.2	7.64	262.52	12	0	1	6.30323e+08	6.34342e+08	6.42692e+08	6.56409e+08	6.80399e+08	5.67244e+08	5.67405e+08	6.0641e+08
A0A452GA47	Cytokeratin-1	KRT1	Cytokeratin-1 OS=Capra hircus OX=9925 GN=KRT1 PE=3 SV=1	73.499	11	9	74	4	614	63.6	8.05	242.92	9	3	1	2.7332e+08	2.40806e+08	2.90536e+08	1.86663e+08	3.33677e+08	3.65905e+08	3.09912e+08	2.87215e+08
A0A452EYK3	Cilia- and flagella-associated protein 157	CFAP157	Cilia- and flagella-associated protein 157 OS=Capra hircus OX=9925 GN=CFAP157 PE=3 SV=1	73.372	35	18	33	18	522	60.7	9.41	102.98	18	0	1	7.77076e+07	8.22694e+07	8.09114e+07	7.61427e+07	8.19632e+07	8.03618e+07	7.63331e+07	8.40708e+07
A0A452FC08	Phosphatidylinositol transfer protein alpha	PITPNA	Phosphatidylinositol transfer protein alpha OS=Capra hircus OX=9925 GN=PITPNA PE=4 SV=1	73.341	36	10	48	9	276	32.2	6.99	161.15	10	1	1	2.19472e+08	2.23104e+08	2.25974e+08	2.0074e+08	2.19733e+08	2.18429e+08	2.31048e+08	2.347e+08
A0A452EM32	Superoxide dismutase [Cu-Zn]	SOD1	Superoxide dismutase [Cu-Zn] OS=Capra hircus OX=9925 GN=SOD1 PE=3 SV=1	73.205	46	8	100	8	154	15.9	6.71	288.35	8	0	1	1.45283e+09	1.48573e+09	1.3846e+09	1.26271e+09	1.51086e+09	1.47367e+09	1.50239e+09	1.48759e+09
A0A452FY52	Aspartate aminotransferase	GOT1	Aspartate aminotransferase OS=Capra hircus OX=9925 GN=GOT1 PE=3 SV=1	73.01	34	13	50	13	413	46.4	7.2	158.29	13	0	1	1.98671e+08	1.97927e+08	2.06417e+08	1.92823e+08	2.056e+08	2.00188e+08	2.1295e+08	2.16698e+08
A0A452FPT6	Cilia and flagella associated protein 77	CFAP77	Cilia and flagella associated protein 77 OS=Capra hircus OX=9925 GN=CFAP77 PE=4 SV=1	72.959	43	12	60	12	284	32.8	10.2	182.27	12	0	1	3.18202e+08	3.42207e+08	3.89843e+08	3.79745e+08	3.93567e+08	3.5834e+08	3.63051e+08	4.28034e+08
A0A452FJX4	Radial spoke head 10 homolog B	LOC102174532	Radial spoke head 10 homolog B OS=Capra hircus OX=9925 GN=LOC102174532 PE=4 SV=1	72.195	21	15	34	15	840	95.9	7.58	90.77	15	0	1	7.22695e+07	7.42448e+07	7.37031e+07	6.33574e+07	6.98236e+07	7.55471e+07	7.3552e+07	7.55957e+07
A0A452EWC8	Monocarboxylate transporter 1	SLC16A1	Monocarboxylate transporter 1 OS=Capra hircus OX=9925 GN=SLC16A1 PE=3 SV=1	72.029	11	7	53	7	501	54.2	8.34	167.04	7	0	1	1.72566e+08	1.71506e+08	1.82665e+08	1.63398e+08	1.84313e+08	1.88083e+08	1.81403e+08	1.76168e+08
A0A452FJG5	Polycystin 2 like 2, transient receptor potential cation channel	PKD2L2	Polycystin 2 like 2, transient receptor potential cation channel OS=Capra hircus OX=9925 GN=PKD2L2 PE=3 SV=1	72.028	19	14	48	14	596	71	9.07	132.05	14	0	1	2.30703e+08	2.28401e+08	2.3251e+08	2.12036e+08	2.41483e+08	2.24596e+08	2.3304e+08	2.37636e+08
A0A452F519	MYCBP associated protein	MYCBPAP	MYCBP associated protein OS=Capra hircus OX=9925 GN=MYCBPAP PE=4 SV=1	71.869	20	18	42	18	947	107.9	6.99	103.85	18	0	1	1.26402e+08	1.25833e+08	1.3099e+08	1.17231e+08	1.29499e+08	1.32529e+08	1.31197e+08	1.3222e+08
A0A452DZH2	Chromosome 9 C6orf163 homolog	C6orf163	Chromosome 9 C6orf163 homolog OS=Capra hircus OX=9925 GN=C6orf163 PE=4 SV=1	71.856	43	14	32	14	329	39	7.05	108.2	14	0	1	1.05303e+08	1.10861e+08	1.13234e+08	1.10587e+08	1.19813e+08	1.05559e+08	1.09005e+08	1.18717e+08
A0A452FVK2	SAMM50 sorting and assembly machinery component	SAMM50	SAMM50 sorting and assembly machinery component OS=Capra hircus OX=9925 GN=SAMM50 PE=3 SV=1	71.612	28	12	39	12	469	51.9	7.28	133.84	12	0	1	1.72522e+08	1.75809e+08	1.77627e+08	1.61612e+08	1.64204e+08	1.72936e+08	1.83584e+08	1.83822e+08
A0A452F0S7	VRK serine/threonine kinase 3	VRK3	VRK serine/threonine kinase 3 OS=Capra hircus OX=9925 GN=VRK3 PE=4 SV=1	71.602	30	12	29	12	434	48.5	8.87	111.83	12	0	1	1.6558e+08	1.69365e+08	1.7514e+08	1.60178e+08	1.68335e+08	1.7538e+08	1.79054e+08	1.75163e+08
A0A452E356	Proteasome 26S subunit, ATPase 3	PSMC3	Proteasome 26S subunit, ATPase 3 OS=Capra hircus OX=9925 GN=PSMC3 PE=3 SV=1	71.565	43	15	28	15	442	49.5	5.24	81.38	15	0	1	7.59407e+07	7.82575e+07	8.22467e+07	7.42854e+07	7.48283e+07	8.17979e+07	8.84848e+07	8.79336e+07
A0A452F2M1	GLIPR1 like 1	GLIPR1L1	GLIPR1 like 1 OS=Capra hircus OX=9925 GN=GLIPR1L1 PE=3 SV=1	70.588	27	9	69	9	284	31.8	8.6	196.43	9	0	1	7.45522e+08	7.55685e+08	7.69863e+08	6.97112e+08	7.04955e+08	7.51652e+08	7.72985e+08	7.78706e+08
A0A452FQS9	Phosphodiesterase	PDE10A	Phosphodiesterase OS=Capra hircus OX=9925 GN=PDE10A PE=3 SV=1	70.412	22	14	27	14	714	80.6	6.43	83.88	14	0	1	7.88194e+07	7.93322e+07	8.08012e+07	7.63547e+07	6.93162e+07	8.43941e+07	8.1926e+07	8.40131e+07
A0A452DX50	Chromosome 3 C1orf194 homolog	C1orf194	Chromosome 3 C1orf194 homolog OS=Capra hircus OX=9925 GN=C1orf194 PE=4 SV=1	70.312	48	8	40	8	170	19.2	9.22	145.18	8	0	1	1.70424e+08	1.77843e+08	1.72277e+08	1.63893e+08	1.71234e+08	1.63051e+08	1.76803e+08	1.70371e+08
A0A452FGF2	Thioredoxin-disulfide reductase	TXNRD1	Thioredoxin-disulfide reductase OS=Capra hircus OX=9925 GN=TXNRD1 PE=3 SV=1	70.293	21	10	48	10	497	54.5	6.62	137.49	10	0	1	1.96504e+08	1.773e+08	1.83221e+08	1.86175e+08	1.79256e+08	1.9512e+08	1.94258e+08	2.06494e+08
A0A452DUA0	Profilin	PFN3	Profilin OS=Capra hircus OX=9925 GN=PFN3 PE=3 SV=1	69.76	55	7	105	7	137	14.6	8.69	370.37	7	0	1	8.37033e+08	8.43028e+08	8.62794e+08	8.47954e+08	8.88285e+08	8.73105e+08	9.1784e+08	9.22799e+08
A0A452F361			Uncharacterized protein OS=Capra hircus OX=9925 PE=4 SV=1	69.736	33	7	64	7	280	30.2	10.81	215.35	7	0	1	2.58154e+08	2.72171e+08	2.56854e+08	2.38858e+08	2.85817e+08	2.46087e+08	2.57808e+08	2.56648e+08
A0A452EEQ2	Vesicle-fusing ATPase	NSF	Vesicle-fusing ATPase OS=Capra hircus OX=9925 GN=NSF PE=3 SV=1	69.609	23	18	44	18	746	83	6.73	122.11	18	0	1	1.38937e+08	1.37971e+08	1.43047e+08	1.41425e+08	1.42216e+08	1.41374e+08	1.50168e+08	1.50193e+08
A0A452EIA8	Cilia and flagella associated protein 161	CFAP161	Cilia and flagella associated protein 161 OS=Capra hircus OX=9925 GN=CFAP161 PE=4 SV=1	69.511	23	6	60	6	298	34	7.2	194.83	6	0	1	2.21095e+08	2.33374e+08	2.33938e+08	2.03253e+08	2.27456e+08	2.497e+08	2.37022e+08	2.44005e+08
A0A452FDD6	Cilia- and flagella-associated protein 206	CFAP206	Cilia- and flagella-associated protein 206 OS=Capra hircus OX=9925 GN=CFAP206 PE=3 SV=1	69.333	28	18	51	18	622	71.1	7.11	142.98	18	0	1	1.95484e+08	1.98325e+08	1.9936e+08	1.98628e+08	1.69058e+08	1.96443e+08	1.96352e+08	2.06556e+08
A0A452F5Q3	Syntaxin binding protein 2	STXBP2	Syntaxin binding protein 2 OS=Capra hircus OX=9925 GN=STXBP2 PE=3 SV=1	69.234	29	15	34	4	588	66.1	6.42	119.26	15	13	1	1.21366e+08	1.26319e+08	1.33118e+08	1.21121e+08	1.38108e+08	1.30305e+08	1.37717e+08	1.43806e+08
A0A452DW79	Radial spoke head 14 homolog	RSPH14	Radial spoke head 14 homolog OS=Capra hircus OX=9925 GN=RSPH14 PE=4 SV=1	69.099	27	9	34	9	379	41.1	5.45	116.31	9	0	1	1.78113e+08	1.86403e+08	1.96213e+08	1.81164e+08	2.03055e+08	1.91619e+08	2.03643e+08	2.09362e+08
A0A452E2L2	Histidine triad nucleotide binding protein 2	HINT2	Histidine triad nucleotide binding protein 2 OS=Capra hircus OX=9925 GN=HINT2 PE=4 SV=1	69.005	41	5	45	5	163	17.2	8.88	161.16	5	0	1	5.8649e+08	6.25528e+08	6.77823e+08	6.30023e+08	6.36028e+08	5.36916e+08	6.67355e+08	7.02944e+08
A0A452FLG6	Deoxyribonuclease	DNASE1L3	Deoxyribonuclease OS=Capra hircus OX=9925 GN=DNASE1L3 PE=3 SV=1	68.895	30	10	30	10	304	35.1	9.22	90.95	10	0	1	1.80792e+08	1.83563e+08	1.88954e+08	1.68497e+08	1.80449e+08	1.84091e+08	2.04813e+08	1.92616e+08
A0A452ETC0	Carboxypeptidase	CPVL	Carboxypeptidase OS=Capra hircus OX=9925 GN=CPVL PE=3 SV=1	68.802	26	12	66	12	473	54.1	7.52	197.15	12	0	1	3.61272e+08	3.7213e+08	3.5148e+08	3.2213e+08	3.64689e+08	3.48297e+08	3.44403e+08	3.39647e+08
A0A452EG78	Succinate dehydrogenase [ubiquinone] iron-sulfur subunit, mitochondrial	SDHB	Succinate dehydrogenase [ubiquinone] iron-sulfur subunit, mitochondrial OS=Capra hircus OX=9925 GN=SDHB PE=3 SV=1	68.769	32	15	68	15	278	31.5	8.19	205.72	15	0	1	6.51665e+08	6.90363e+08	7.23247e+08	6.55945e+08	6.81322e+08	6.36242e+08	7.48499e+08	7.60622e+08
A0A452DN79	Peptidase S1 domain-containing protein		Peptidase S1 domain-containing protein OS=Capra hircus OX=9925 PE=4 SV=1	67.91	31	5	29	5	254	28.4	7.61	109.18	5	0	1	5.90404e+07	6.43986e+07	6.24354e+07	5.545e+07	6.63171e+07	6.65268e+07	6.98563e+07	6.90189e+07
A0A452DS23	Aspartylglucosaminidase	AGA	Aspartylglucosaminidase OS=Capra hircus OX=9925 GN=AGA PE=3 SV=1	67.906	34	10	48	10	346	37.1	7.33	143.95	10	0	1	2.75302e+08	2.7042e+08	2.69894e+08	2.42641e+08	2.73991e+08	2.74098e+08	2.83442e+08	2.88771e+08
A0A452FKD1	Dynein axonemal heavy chain 14	DNAH14	Dynein axonemal heavy chain 14 OS=Capra hircus OX=9925 GN=DNAH14 PE=3 SV=1	67.741	5	21	35	19	4605	530.6	6.42	102.96	21	0	1	5.12233e+07	5.49231e+07	5.33104e+07	4.67902e+07	5.21049e+07	5.41207e+07	5.36945e+07	5.50628e+07
A0A452DWB5	Inorganic diphosphatase	PPA2	Inorganic diphosphatase OS=Capra hircus OX=9925 GN=PPA2 PE=3 SV=1	67.732	42	12	76	1	316	35.6	6.79	230.6	12	0	1	1.67219e+06	1.89433e+06	1.58475e+06	1.23571e+06	1.6247e+06	1.262e+06	1.31629e+06	1.09357e+06
A0A452DL02			Uncharacterized protein OS=Capra hircus OX=9925 PE=4 SV=1	67.711	10	13	54	2	1297	142.6	6.87	185.26	13	12	1	2.80172e+08	2.59179e+08	2.58956e+08	2.04346e+08	2.77427e+08	2.7109e+08	3.15326e+08	2.56234e+08
A0A452ERM8	NADH dehydrogenase [ubiquinone] flavoprotein 2, mitochondrial	NDUFV2	NADH dehydrogenase [ubiquinone] flavoprotein 2, mitochondrial OS=Capra hircus OX=9925 GN=NDUFV2 PE=3 SV=1	67.315	47	10	52	10	249	27.4	8.06	155.97	10	0	1	2.50423e+08	2.59424e+08	2.67749e+08	2.51355e+08	2.59962e+08	2.54848e+08	2.64967e+08	2.86104e+08
A0A452DYC1	Dynein regulatory complex subunit 3	DRC3	Dynein regulatory complex subunit 3 OS=Capra hircus OX=9925 GN=DRC3 PE=4 SV=1	67.311	23	13	40	13	517	60.3	4.75	124.12	13	0	1	1.96027e+08	2.05728e+08	2.14052e+08	2.15373e+08	2.09797e+08	1.94652e+08	2.07839e+08	2.27966e+08
A0A452G1M6			Uncharacterized protein OS=Capra hircus OX=9925 PE=4 SV=1	67.237	14	19	39	19	1353	150.3	9.09	103.8	19	0	1	1.25369e+08	1.42158e+08	1.05665e+08	9.39727e+07	1.23703e+08	1.12568e+08	1.30454e+08	9.67843e+07
A0A452F4R6	Isocitrate dehydrogenase [NADP]	IDH1	Isocitrate dehydrogenase [NADP] OS=Capra hircus OX=9925 GN=IDH1 PE=3 SV=1	67.205	36	16	35	15	414	46.7	6.62	98.31	16	0	1	1.15108e+08	1.09904e+08	1.15194e+08	1.34074e+08	1.16048e+08	1.21992e+08	1.24125e+08	1.19003e+08
A0A452FYF1	Phosphate carrier protein, mitochondrial		Phosphate carrier protein, mitochondrial OS=Capra hircus OX=9925 PE=3 SV=1	67.083	34	13	131	10	341	38	9.48	382.33	13	3	1	1.17876e+09	1.22286e+09	1.3276e+09	1.30146e+09	1.32836e+09	1.23494e+09	1.33819e+09	1.43757e+09
A0A452EN33	Keratin 14	KRT14	Keratin 14 OS=Capra hircus OX=9925 GN=KRT14 PE=3 SV=1	67.024	23	13	65	4	514	55.9	5.26	185.62	13	5	1	2.46927e+08	2.52624e+08	2.67388e+08	1.84407e+08	3.03058e+08	3.32793e+08	3.65989e+08	2.52789e+08
A0A452DS14	Alpha-L-fucosidase	FUCA1	Alpha-L-fucosidase OS=Capra hircus OX=9925 GN=FUCA1 PE=3 SV=1	66.833	26	12	35	12	471	54.2	6.92	108.91	12	0	1	1.10579e+08	1.15225e+08	1.04692e+08	9.23121e+07	1.11934e+08	1.12032e+08	1.08078e+08	1.06027e+08
A0A452FEB2	Insulin like 6	INSL6	Insulin like 6 OS=Capra hircus OX=9925 GN=INSL6 PE=3 SV=1	66.462	40	7	56	7	205	23.9	9.17	187.03	7	0	1	2.71543e+08	2.58258e+08	2.93926e+08	2.0937e+08	3.41335e+08	1.97267e+08	2.75531e+08	2.64888e+08
A0A452E7L5	Sperm acrosome associated 9	SPACA9	Sperm acrosome associated 9 OS=Capra hircus OX=9925 GN=SPACA9 PE=4 SV=1	66.293	37	5	59	5	178	20.4	7.59	214.91	5	0	1	3.83684e+08	3.99493e+08	4.4963e+08	5.06015e+08	6.44988e+08	4.90473e+08	4.30313e+08	4.84828e+08
A0A452EY58	AU RNA binding methylglutaconyl-CoA hydratase	AUH	AU RNA binding methylglutaconyl-CoA hydratase OS=Capra hircus OX=9925 GN=AUH PE=3 SV=1	66.19	42	14	62	14	313	33.3	9.23	180.03	14	0	1	4.67867e+08	5.06254e+08	5.2682e+08	5.40511e+08	5.59178e+08	4.53909e+08	5.04131e+08	5.57864e+08
A0A452EJ58	Translin associated factor X interacting protein 1	TSNAXIP1	Translin associated factor X interacting protein 1 OS=Capra hircus OX=9925 GN=TSNAXIP1 PE=4 SV=1	66.187	31	18	40	18	634	74.7	5.62	111.41	18	0	1	1.27383e+08	1.33554e+08	1.29892e+08	1.54713e+08	1.35655e+08	1.30918e+08	1.2566e+08	1.30919e+08
A0A452FMI8	Cilia and flagella associated protein 69	CFAP69	Cilia and flagella associated protein 69 OS=Capra hircus OX=9925 GN=CFAP69 PE=4 SV=1	66.079	15	12	26	12	951	107	7.74	91.53	12	0	1	1.30445e+08	1.39636e+08	1.44414e+08	1.38256e+08	1.32267e+08	1.4222e+08	1.404e+08	1.50708e+08
A0A452F9D6	Patched domain-containing protein 3-like	LOC102172622	Patched domain-containing protein 3-like OS=Capra hircus OX=9925 GN=LOC102172622 PE=4 SV=1	65.885	13	10	37	10	793	88.6	5.39	143.31	10	0	1	1.62389e+08	1.66886e+08	1.65258e+08	1.55707e+08	1.67059e+08	1.67017e+08	1.66571e+08	1.65246e+08
A0A452G4H8	Stomatin like 2	STOML2	Stomatin like 2 OS=Capra hircus OX=9925 GN=STOML2 PE=3 SV=1	65.797	38	8	19	8	356	38.8	7.94	67.26	8	0	1	4.12003e+07	4.29017e+07	4.21707e+07	3.92441e+07	4.1998e+07	4.08316e+07	4.17709e+07	4.1908e+07
A0A452DRE2	IQ motif containing with AAA domain 1	IQCA1	IQ motif containing with AAA domain 1 OS=Capra hircus OX=9925 GN=IQCA1 PE=4 SV=1	65.791	18	14	29	14	832	96.3	9.38	76.32	14	0	1	1.20207e+08	1.24883e+08	1.17598e+08	1.19008e+08	1.18313e+08	1.16824e+08	1.15543e+08	1.19331e+08
A0A452FM54	Maillard deglycase	PARK7	Maillard deglycase OS=Capra hircus OX=9925 GN=PARK7 PE=3 SV=1	65.778	61	11	42	11	189	20	7.33	139.67	11	0	1	2.437e+08	2.67758e+08	2.68957e+08	2.42422e+08	2.61861e+08	2.36005e+08	2.83553e+08	2.97772e+08
A0A452FHX6	Ubiquitin-activating enzyme E1	UBA1	Ubiquitin-activating enzyme E1 OS=Capra hircus OX=9925 GN=UBA1 PE=3 SV=1	65.008	14	13	25	13	1166	129.3	5.85	74.78	13	0	1	8.49982e+07	8.7384e+07	9.61418e+07	8.36841e+07	9.00311e+07	9.51639e+07	9.60961e+07	9.83512e+07
A0A452G4C7	ATP-dependent (S)-NAD(P)H-hydrate dehydratase	NAXD	ATP-dependent (S)-NAD(P)H-hydrate dehydratase OS=Capra hircus OX=9925 GN=NAXD PE=3 SV=1	64.976	34	9	34	9	328	34.7	8.31	116.31	9	0	1	1.07679e+08	1.19227e+08	1.09242e+08	9.88661e+07	1.10163e+08	1.11297e+08	1.0641e+08	1.09411e+08
A0A452FQK2	Aminopeptidase	NPEPPS	Aminopeptidase OS=Capra hircus OX=9925 GN=NPEPPS PE=3 SV=1	64.967	22	17	32	17	921	103.6	5.83	91.12	17	0	1	8.06854e+07	8.50173e+07	8.25352e+07	7.41485e+07	8.0188e+07	8.20703e+07	8.33288e+07	8.33213e+07
A0A452EJU5	Phosphoglycolate phosphatase	PGP	Phosphoglycolate phosphatase OS=Capra hircus OX=9925 GN=PGP PE=3 SV=1	64.88	42	11	58	11	323	34.5	5.26	175.94	11	0	1	1.78156e+08	1.82564e+08	1.85427e+08	1.79558e+08	1.8285e+08	2.03439e+08	1.97908e+08	2.03622e+08
A0A452E1I4	Disintegrin and metalloproteinase domain-containing protein 2	ADAM2	Disintegrin and metalloproteinase domain-containing protein 2 OS=Capra hircus OX=9925 GN=ADAM2 PE=4 SV=1	64.7	13	7	42	7	717	80.1	5.67	127.8	7	0	1	1.39015e+08	1.3167e+08	1.1668e+08	1.88639e+08	1.60115e+08	1.10532e+08	1.29359e+08	1.308e+08
A0A452G3N6	Septin	SEPTIN10	Septin OS=Capra hircus OX=9925 GN=SEPTIN10 PE=3 SV=1	64.648	20	8	28	8	451	52.3	6.87	82.3	8	0	1	8.19881e+07	8.50002e+07	8.50094e+07	9.5091e+07	8.29694e+07	8.46024e+07	8.42051e+07	8.47726e+07
A0A452FAM6	Sodium/hydrogen exchanger 9B1	SLC9B1	Sodium/hydrogen exchanger 9B1 OS=Capra hircus OX=9925 GN=SLC9B1 PE=4 SV=1	64.557	18	8	42	8	513	55.3	7.15	147.28	8	0	1	1.36907e+08	1.40156e+08	1.3935e+08	1.28708e+08	1.36452e+08	1.28664e+08	1.34421e+08	1.34394e+08
A0A452FX44	DnaJ heat shock protein family (Hsp40) member A4	DNAJA4	DnaJ heat shock protein family (Hsp40) member A4 OS=Capra hircus OX=9925 GN=DNAJA4 PE=3 SV=1	64.52	24	11	31	11	506	56.6	8.54	96.91	11	0	1	7.12627e+07	7.29692e+07	7.37109e+07	6.67626e+07	7.33102e+07	7.39212e+07	7.66686e+07	7.63988e+07
A0A452G711	3-hydroxybutyrate dehydrogenase 1	BDH1	3-hydroxybutyrate dehydrogenase 1 OS=Capra hircus OX=9925 GN=BDH1 PE=3 SV=1	64.47	38	11	53	11	344	38.3	8.56	143.64	11	0	1	3.12613e+08	3.32476e+08	3.91245e+08	3.6549e+08	3.6511e+08	3.3569e+08	4.05467e+08	4.38361e+08
A0A452ECL6	Lymphocyte expansion molecule	LEXM	Lymphocyte expansion molecule OS=Capra hircus OX=9925 GN=LEXM PE=4 SV=1	64.219	38	17	42	17	408	46.1	9.86	117.76	17	0	1	1.72207e+08	1.81472e+08	1.82624e+08	1.59459e+08	1.82326e+08	1.82324e+08	1.82743e+08	1.87007e+08
A0A452EX76	Isocitrate dehydrogenase [NAD] subunit, mitochondrial	IDH3G	Isocitrate dehydrogenase [NAD] subunit, mitochondrial OS=Capra hircus OX=9925 GN=IDH3G PE=3 SV=1	64.064	29	8	57	8	388	42.5	9.33	182.81	8	0	1	2.1725e+08	2.39918e+08	2.24138e+08	2.05478e+08	2.25772e+08	2.2743e+08	2.27201e+08	2.26506e+08
A0A452FER1	Vacuolar protein sorting 13 homolog A	VPS13A	Vacuolar protein sorting 13 homolog A OS=Capra hircus OX=9925 GN=VPS13A PE=3 SV=1	63.95	6	20	33	20	3156	358.9	6.3	97.43	20	0	1	8.62143e+07	8.84777e+07	8.34659e+07	8.35779e+07	8.87382e+07	8.78926e+07	8.26555e+07	8.01885e+07
A0A452GB57	Nucleoporin 54	NUP54	Nucleoporin 54 OS=Capra hircus OX=9925 GN=NUP54 PE=4 SV=1	63.817	25	12	27	12	510	55.9	7.02	78.79	12	0	1	6.64608e+07	6.79752e+07	6.80945e+07	6.33298e+07	6.41661e+07	6.90631e+07	6.78674e+07	7.00519e+07
A0A452E0C3	10 kDa heat shock protein, mitochondrial	HSPE1	10 kDa heat shock protein, mitochondrial OS=Capra hircus OX=9925 GN=HSPE1 PE=3 SV=1	62.987	70	8	100	8	101	10.8	8.92	286.56	8	0	1	1.47448e+09	1.65068e+09	1.57074e+09	1.54452e+09	1.57467e+09	1.11932e+09	1.48331e+09	1.47539e+09
A0A452EMR2	Testis anion transporter 1	SLC26A8	Testis anion transporter 1 OS=Capra hircus OX=9925 GN=SLC26A8 PE=3 SV=1	62.983	9	9	33	9	912	103.2	5.58	113.09	9	0	1	1.25991e+08	1.34331e+08	1.30453e+08	1.16017e+08	1.2327e+08	1.20288e+08	1.31618e+08	1.30964e+08
A0A452FNY3	Spermatogenesis associated 19	SPATA19	Spermatogenesis associated 19 OS=Capra hircus OX=9925 GN=SPATA19 PE=4 SV=1	62.697	36	5	67	5	154	17.9	7.18	236.69	5	0	1	8.08631e+08	8.16808e+08	8.63756e+08	8.43464e+08	8.80891e+08	8.50178e+08	8.81006e+08	8.78748e+08
A0A452DV34			Uncharacterized protein OS=Capra hircus OX=9925 PE=3 SV=1	62.538	25	6	78	4	182	19.9	9.39	262.22	6	3	1	1.07408e+09	1.11176e+09	1.10175e+09	1.05814e+09	1.08133e+09	8.79152e+08	1.05779e+09	1.04909e+09
A0A452GA32	ClpB homolog, mitochondrial AAA ATPase chaperonin	CLPB	ClpB homolog, mitochondrial AAA ATPase chaperonin OS=Capra hircus OX=9925 GN=CLPB PE=4 SV=1	62.452	19	12	33	12	677	75.5	8.53	92.99	12	0	1	9.37682e+07	1.01047e+08	1.02116e+08	9.70614e+07	1.02817e+08	9.40064e+07	1.07167e+08	1.05666e+08
A0A452F4X2	Maestro heat like repeat family member 1	MROH1	Maestro heat like repeat family member 1 OS=Capra hircus OX=9925 GN=MROH1 PE=4 SV=1	62.296	9	14	22	14	1616	177.7	7.08	71.2	14	0	1	4.69018e+07	4.84921e+07	5.30525e+07	4.73159e+07	5.35981e+07	5.39591e+07	5.9614e+07	6.24508e+07
A0A452FR97	Phosphoglycerate mutase	PGAM1	Phosphoglycerate mutase OS=Capra hircus OX=9925 GN=PGAM1 PE=3 SV=1	62.252	21	6	47	2	254	28.9	7.18	142.52	6	0	1	2.1135e+07	2.10697e+07	2.34358e+07	2.76362e+07	2.56791e+07	2.43427e+07	2.51855e+07	2.66771e+07
A0A452FTT8	Solute carrier family 25 member 24	SLC25A24	Solute carrier family 25 member 24 OS=Capra hircus OX=9925 GN=SLC25A24 PE=3 SV=1	62.059	25	12	38	2	476	53.6	6.89	124.43	12	0	1	2.67229e+07	2.77735e+07	2.90595e+07	2.81795e+07	2.89092e+07	2.82428e+07	2.92354e+07	3.00237e+07
A0A452EY73	26S proteasome non-ATPase regulatory subunit 2	PSMD2	26S proteasome non-ATPase regulatory subunit 2 OS=Capra hircus OX=9925 GN=PSMD2 PE=3 SV=1	62.053	16	14	34	14	979	107.6	5.31	90.73	14	0	1	8.81684e+07	9.19874e+07	9.70531e+07	9.04303e+07	9.44684e+07	9.75827e+07	1.11225e+08	1.08543e+08
A0A452EMJ7	Alpha/beta hydrolase domain-containing protein 16A	ABHD16A	Alpha/beta hydrolase domain-containing protein 16A OS=Capra hircus OX=9925 GN=ABHD16A PE=3 SV=1	61.917	25	14	27	14	558	63.3	8	88.39	14	0	1	9.32722e+07	1.12348e+08	9.81635e+07	8.82347e+07	1.09622e+08	9.97371e+07	9.88094e+07	9.66064e+07
A0A452F116	Hypoxia up-regulated 1	HYOU1	Hypoxia up-regulated 1 OS=Capra hircus OX=9925 GN=HYOU1 PE=3 SV=1	61.862	20	17	36	17	1001	111.2	5.26	105.68	17	0	1	1.09883e+08	1.22428e+08	1.06501e+08	1.01194e+08	1.11458e+08	1.07561e+08	1.04205e+08	1.01668e+08
A0A452DUF4	Leucine rich repeat containing 74A	LRRC74A	Leucine rich repeat containing 74A OS=Capra hircus OX=9925 GN=LRRC74A PE=4 SV=1	61.767	22	8	37	8	494	54.8	5.94	96.68	8	0	1	8.12432e+07	9.05779e+07	8.23924e+07	7.70147e+07	8.50382e+07	9.03869e+07	8.40853e+07	8.51892e+07
A0A452FVS1	Adenylate kinase 2, mitochondrial	AK2	Adenylate kinase 2, mitochondrial OS=Capra hircus OX=9925 GN=AK2 PE=3 SV=1	61.689	42	11	52	11	241	26.4	8.13	148.72	11	0	1	1.83683e+08	2.0106e+08	2.06606e+08	2.93167e+08	2.35417e+08	1.86328e+08	1.96633e+08	2.33071e+08
A0A452EX96	Exportin 7	XPO7	Exportin 7 OS=Capra hircus OX=9925 GN=XPO7 PE=3 SV=1	61.619	14	14	34	14	1087	123.8	6.32	98.33	14	0	1	8.71793e+07	8.77705e+07	9.28236e+07	8.12035e+07	9.032e+07	9.61351e+07	9.4597e+07	9.42512e+07
A0A452G4S9	Transmembrane protein 190	TMEM190	Transmembrane protein 190 OS=Capra hircus OX=9925 GN=TMEM190 PE=4 SV=1	61.618	45	4	71	4	179	19.6	5.2	230.14	4	0	1	8.93988e+08	8.30392e+08	9.43521e+08	8.94869e+08	8.14266e+08	7.97581e+08	9.13077e+08	8.96594e+08
A0A452E1R4	Folate gamma-glutamyl hydrolase	GGH	Folate gamma-glutamyl hydrolase OS=Capra hircus OX=9925 GN=GGH PE=3 SV=1	61.455	29	9	57	9	318	35.6	8.94	163.18	9	0	1	3.78396e+08	3.8975e+08	3.81511e+08	3.39598e+08	3.88892e+08	3.59912e+08	3.86714e+08	3.88798e+08
A0A452G0P6	Keratin 10	KRT10	Keratin 10 OS=Capra hircus OX=9925 GN=KRT10 PE=3 SV=1	60.759	16	12	68	5	564	58	5.07	197.76	12	0	1	1.77066e+08	1.56166e+08	2.00627e+08	1.13245e+08	2.01941e+08	2.28609e+08	2.07243e+08	1.94111e+08
A0A452EM23	Coiled-coil domain containing 113	CCDC113	Coiled-coil domain containing 113 OS=Capra hircus OX=9925 GN=CCDC113 PE=4 SV=1	60.651	37	13	27	13	377	44.2	8.57	85.89	13	0	1	8.17144e+07	8.11833e+07	8.23316e+07	1.04958e+08	8.11298e+07	8.25746e+07	7.98481e+07	8.22862e+07
A0A452FUF7	RAB42, member RAS oncogene family	RAB42	RAB42, member RAS oncogene family OS=Capra hircus OX=9925 GN=RAB42 PE=4 SV=1	60.28	43	8	60	7	220	24.6	7.28	189.4	8	0	1	3.53489e+08	2.99462e+08	3.09819e+08	2.64543e+08	3.44287e+08	3.10115e+08	3.99635e+08	2.96085e+08
A0A452EDD7	Cilia and flagella associated protein 74	CFAP74	Cilia and flagella associated protein 74 OS=Capra hircus OX=9925 GN=CFAP74 PE=4 SV=1	60.177	13	18	31	18	1467	163.9	6.95	73.55	18	0	1	1.95917e+08	1.98544e+08	1.892e+08	1.74486e+08	1.87301e+08	1.84147e+08	1.82937e+08	1.91438e+08
A0A023NEH1	Cytochrome c oxidase subunit 2 (Fragment)	COX2	Cytochrome c oxidase subunit 2 (Fragment) OS=Capra hircus OX=9925 GN=COX2 PE=3 SV=1	60.077	27	5	74	5	220	25.2	4.81	170.18	5	0	1	1.5408e+09	1.67542e+09	1.65271e+09	1.59038e+09	1.55822e+09	1.40632e+09	1.64338e+09	1.67705e+09
A0A2S1NB36	NAD-dependent protein deacetylase	SIRT3	NAD-dependent protein deacetylase OS=Capra hircus OX=9925 GN=SIRT3 PE=2 SV=1	59.748	26	8	36	8	333	36.9	8.69	134.2	8	0	1	1.18052e+08	1.28569e+08	1.27524e+08	1.16327e+08	1.21642e+08	1.22501e+08	1.26493e+08	1.31006e+08
A0A452EUD9	Carbonic anhydrase	CA2	Carbonic anhydrase OS=Capra hircus OX=9925 GN=CA2 PE=3 SV=1	59.214	45	9	35	9	260	29.1	6.92	112.69	9	0	1	1.12363e+08	1.1187e+08	1.09861e+08	1.0652e+08	1.15185e+08	1.05832e+08	1.12569e+08	1.11905e+08
A0A452FJJ1	Dynein axonemal heavy chain 9	DNAH9	Dynein axonemal heavy chain 9 OS=Capra hircus OX=9925 GN=DNAH9 PE=3 SV=1	59.149	2	9	53	1	4486	509.6	5.94	145.71	9	0	1	1.71123e+07	1.88591e+07	1.87826e+07	1.69237e+07	1.82432e+07	1.87609e+07	1.82172e+07	1.97961e+07
A0A452FDX9	Keratin, type II cytoskeletal 6A-like	LOC108633262	Keratin, type II cytoskeletal 6A-like OS=Capra hircus OX=9925 GN=LOC108633262 PE=3 SV=1	59.066	15	12	33	3	560	59.8	8.15	102.21	12	3	1	2.54182e+07	2.19524e+07	2.85252e+07	2.12345e+07	3.15698e+07	2.48956e+07	1.1161e+08	2.29367e+07
A0A452F6D5	WD repeat domain 64	WDR64	WD repeat domain 64 OS=Capra hircus OX=9925 GN=WDR64 PE=4 SV=1	58.923	20	12	37	2	635	72.8	7.64	109.73	12	2	1	1.45185e+07	1.42856e+07	1.44573e+07	1.40076e+07	1.45916e+07	1.40535e+07	1.39352e+07	1.42961e+07
A0A452DJW1			Uncharacterized protein OS=Capra hircus OX=9925 PE=4 SV=1	58.797	10	13	53	2	1342	148.2	7.21	175.03	13	0	1	5.49731e+07	5.8399e+07	5.36529e+07	4.54476e+07	5.80008e+07	5.29815e+07	6.82874e+07	5.54331e+07
A0A452F727			Uncharacterized protein OS=Capra hircus OX=9925 PE=3 SV=1	58.789	23	12	27	1	545	61.2	6.4	91.53	12	0	1	5.71674e+06	6.9184e+06	7.36342e+06	7.08202e+06	7.34951e+06	6.4249e+06	8.37006e+06	9.30119e+06
A0A452F2V9	V-type proton ATPase subunit C	ATP6V1C1	V-type proton ATPase subunit C OS=Capra hircus OX=9925 GN=ATP6V1C1 PE=3 SV=1	58.771	35	13	27	13	382	43.9	7.46	78.94	13	0	1	8.832e+07	9.161e+07	9.11183e+07	9.02585e+07	9.17834e+07	8.7044e+07	9.29502e+07	9.87899e+07
A0A452EV68	NADPH:adrenodoxin oxidoreductase, mitochondrial	FDXR	NADPH:adrenodoxin oxidoreductase, mitochondrial OS=Capra hircus OX=9925 GN=FDXR PE=3 SV=1	58.759	30	14	40	14	492	54.4	8.24	116.05	14	0	1	1.64654e+08	1.74591e+08	1.77162e+08	1.62654e+08	1.75774e+08	1.77808e+08	1.81562e+08	1.86371e+08
A0A452G8Y9	ADP/ATP translocase	SLC25A4	ADP/ATP translocase OS=Capra hircus OX=9925 GN=SLC25A4 PE=3 SV=1	58.739	36	11	99	2	298	32.9	9.83	256.99	11	0	1	1.83456e+07	1.94448e+07	1.9245e+07	1.69722e+07	1.93421e+07	1.70075e+07	2.05769e+07	2.1631e+07
A0A452G3B3	Tyrosine 3-monooxygenase/tryptophan 5-monooxygenase activation protein gamma	YWHAG	Tyrosine 3-monooxygenase/tryptophan 5-monooxygenase activation protein gamma OS=Capra hircus OX=9925 GN=YWHAG PE=3 SV=1	58.609	38	10	37	5	247	28.3	4.89	99.26	10	3	1	7.47854e+07	8.10996e+07	7.42139e+07	8.52758e+07	7.95157e+07	7.45563e+07	7.4322e+07	7.27623e+07
A0A452EQ26	Polycystin family receptor for egg jelly	PKDREJ	Polycystin family receptor for egg jelly OS=Capra hircus OX=9925 GN=PKDREJ PE=3 SV=1	58.583	7	15	29	15	2072	235.7	8.6	79	15	0	1	8.9701e+07	9.07603e+07	9.22503e+07	8.16984e+07	9.0175e+07	9.02077e+07	9.17752e+07	9.38812e+07
A0A452F1P8	ST13 Hsp70 interacting protein	ST13	ST13 Hsp70 interacting protein OS=Capra hircus OX=9925 GN=ST13 PE=3 SV=1	58.405	24	9	32	4	374	41.9	5.47	95.18	9	6	1	2.42699e+08	2.45241e+08	2.80957e+08	2.86271e+08	2.83823e+08	2.40479e+08	2.78651e+08	2.9843e+08
A0A452FTL9	VAMP associated protein B and C	VAPB	VAMP associated protein B and C OS=Capra hircus OX=9925 GN=VAPB PE=4 SV=1	58.383	42	9	39	8	243	27.1	7.3	135.62	9	0	1	8.90721e+07	9.63053e+07	9.30127e+07	8.28828e+07	9.22565e+07	8.8696e+07	9.97224e+07	9.16984e+07
A0A452DSE7	ATP binding cassette subfamily B member 7	ABCB7	ATP binding cassette subfamily B member 7 OS=Capra hircus OX=9925 GN=ABCB7 PE=4 SV=1	58.357	14	9	23	9	745	82.2	9.41	66.18	9	0	1	5.70135e+07	5.63161e+07	5.73007e+07	5.33767e+07	5.65124e+07	5.69712e+07	5.54466e+07	5.54009e+07
A0A452F7E0	Myeloid leukemia factor 1	MLF1	Myeloid leukemia factor 1 OS=Capra hircus OX=9925 GN=MLF1 PE=3 SV=1	58.197	36	10	103	10	269	31	9.31	251.41	10	0	1	4.56492e+08	4.79901e+08	4.41697e+08	4.15206e+08	4.6354e+08	4.31109e+08	4.4657e+08	4.42708e+08
A0A452E770	T-complex-associated-testis-expressed 1	TCTE1	T-complex-associated-testis-expressed 1 OS=Capra hircus OX=9925 GN=TCTE1 PE=4 SV=1	58.177	27	9	21	9	508	55.9	6.81	71.82	9	0	1	2.96394e+07	2.99722e+07	3.01425e+07	2.78216e+07	3.03154e+07	3.03299e+07	3.0996e+07	3.18252e+07
A0A452DRC0	Galactokinase 1	GALK1	Galactokinase 1 OS=Capra hircus OX=9925 GN=GALK1 PE=3 SV=1	57.583	32	10	28	10	392	42.2	6.47	98.96	10	0	1	1.40278e+08	1.36263e+08	1.49423e+08	1.19954e+08	1.49717e+08	1.5226e+08	1.6602e+08	1.62384e+08
A0A452ETP0	Chromosome 17 C4orf45 homolog	C4orf45	Chromosome 17 C4orf45 homolog OS=Capra hircus OX=9925 GN=C4orf45 PE=4 SV=1	57.389	49	9	48	9	226	25.8	9.73	126.11	9	0	1	1.57366e+08	1.59088e+08	1.70961e+08	1.60474e+08	1.63421e+08	1.61119e+08	1.69721e+08	1.8177e+08
A0A452FS72	Tyrosine 3-monooxygenase/tryptophan 5-monooxygenase activation protein epsilon	YWHAE	Tyrosine 3-monooxygenase/tryptophan 5-monooxygenase activation protein epsilon OS=Capra hircus OX=9925 GN=YWHAE PE=3 SV=1	57.362	47	11	45	9	243	27.6	5.11	147.53	11	0	1	1.10215e+08	1.06615e+08	1.08692e+08	1.11075e+08	1.13042e+08	1.07347e+08	1.0863e+08	1.05146e+08
A0A452DQ02	Proteasome 26S subunit, non-ATPase 3	PSMD3	Proteasome 26S subunit, non-ATPase 3 OS=Capra hircus OX=9925 GN=PSMD3 PE=3 SV=1	57.302	23	13	35	13	537	61.3	8.6	111.81	13	0	1	6.48921e+07	6.96092e+07	6.70767e+07	6.69142e+07	6.25662e+07	6.69603e+07	7.11998e+07	7.32433e+07
A0A452FB33	Galactosidase beta 1 like	GLB1L	Galactosidase beta 1 like OS=Capra hircus OX=9925 GN=GLB1L PE=3 SV=1	57.26	17	9	30	8	647	73.2	8.53	104.53	9	1	1	1.99667e+08	2.3853e+08	1.33208e+08	2.34359e+08	1.04824e+08	2.19079e+08	1.38983e+08	2.02315e+08
A0A452FMM6	Fatty acid amide hydrolase	FAAH	Fatty acid amide hydrolase OS=Capra hircus OX=9925 GN=FAAH PE=3 SV=1	57.062	18	8	27	8	565	61.1	7.46	89.22	8	0	1	6.05144e+07	6.71212e+07	6.77771e+07	6.32129e+07	6.2915e+07	6.27591e+07	7.08088e+07	6.73237e+07
A0A452E2H7	Elongation factor 1-alpha	EEF1A1	Elongation factor 1-alpha OS=Capra hircus OX=9925 GN=EEF1A1 PE=3 SV=1	56.974	29	14	61	14	462	50.1	9.01	161.12	14	0	1	4.77366e+08	4.49141e+08	4.37305e+08	6.06998e+08	4.69191e+08	5.12164e+08	4.61745e+08	4.38727e+08
A0A452F086	Radial spoke head component 1	RSPH1	Radial spoke head component 1 OS=Capra hircus OX=9925 GN=RSPH1 PE=4 SV=1	56.957	38	7	40	7	270	30.5	4.46	149.05	7	0	1	3.14918e+08	3.21329e+08	3.13736e+08	2.90881e+08	3.01675e+08	2.81601e+08	3.08714e+08	3.04299e+08
A0A452EPC9	Spermatogenesis associated 48	SPATA48	Spermatogenesis associated 48 OS=Capra hircus OX=9925 GN=SPATA48 PE=4 SV=1	56.815	35	14	36	14	417	47	8.82	99.51	14	0	1	2.38457e+08	2.57406e+08	2.68019e+08	2.55386e+08	2.51435e+08	2.55855e+08	2.72528e+08	2.86056e+08
A0A452FH12	Pyruvate dehyrogenase phosphatase catalytic subunit 1	PDP1	Pyruvate dehyrogenase phosphatase catalytic subunit 1 OS=Capra hircus OX=9925 GN=PDP1 PE=3 SV=1	56.811	21	10	23	10	592	66.5	6.74	71.43	10	0	1	9.87954e+07	1.00855e+08	9.46156e+07	8.97741e+07	9.74873e+07	9.48729e+07	9.52777e+07	9.52249e+07
A0A452F3H8	Exportin 1	XPO1	Exportin 1 OS=Capra hircus OX=9925 GN=XPO1 PE=3 SV=1	56.683	14	13	23	13	1071	123.1	6.11	78.6	13	0	1	8.50979e+07	8.03803e+07	8.33654e+07	7.59417e+07	8.73392e+07	8.74656e+07	9.03673e+07	8.86892e+07
A0A452E0N8	Chromosome 15 open reading frame 48		Chromosome 15 open reading frame 48 OS=Capra hircus OX=9925 PE=4 SV=1	56.635	48	4	36	4	83	9.6	9.89	138.74	4	0	1	1.73601e+08	1.78377e+08	1.99331e+08	2.28176e+08	1.72304e+08	1.8935e+08	1.76057e+08	2.17822e+08
A0A452F714	Phosphatidylethanolamine binding protein 4	PEBP4	Phosphatidylethanolamine binding protein 4 OS=Capra hircus OX=9925 GN=PEBP4 PE=3 SV=1	56.551	28	4	24	4	223	25.1	6.11	81.23	4	0	1	6.17442e+08	6.15457e+08	5.9336e+08	5.26229e+08	5.96957e+08	5.30308e+08	6.05627e+08	5.98866e+08
A0A452DMC0	Malic enzyme	ME2	Malic enzyme OS=Capra hircus OX=9925 GN=ME2 PE=3 SV=1	56.544	19	11	35	10	584	65.4	7.65	107.34	11	1	1	1.71889e+08	1.98455e+08	1.80185e+08	1.67964e+08	1.81129e+08	1.79756e+08	1.83434e+08	1.86876e+08
A0A452EB32	IQ motif containing F1	IQCF1	IQ motif containing F1 OS=Capra hircus OX=9925 GN=IQCF1 PE=4 SV=1	56.417	33	7	72	6	203	23.5	10.11	230.78	7	1	1	6.69082e+08	6.27512e+08	8.3312e+08	7.46922e+08	1.08191e+09	1.11573e+09	8.52698e+08	9.611e+08
A0A452E679	Dynein regulatory complex protein 9	IQCG	Dynein regulatory complex protein 9 OS=Capra hircus OX=9925 GN=IQCG PE=3 SV=1	56.359	33	17	43	17	438	51.4	6.52	116.55	17	0	1	1.92776e+08	1.92748e+08	1.96378e+08	2.02298e+08	1.9953e+08	1.94944e+08	1.83992e+08	2.00825e+08
A0A452DZE4	Diazepam-binding inhibitor-like 5	LOC102175985	Diazepam-binding inhibitor-like 5 OS=Capra hircus OX=9925 GN=LOC102175985 PE=4 SV=1	56.337	51	5	64	5	87	9.8	7.81	204.14	5	0	1	7.72201e+08	8.04842e+08	8.99849e+08	8.44739e+08	8.35173e+08	6.58925e+08	8.48704e+08	8.67402e+08
A0A452FP32	Malate dehydrogenase 1B	MDH1B	Malate dehydrogenase 1B OS=Capra hircus OX=9925 GN=MDH1B PE=3 SV=1	56.17	26	11	31	11	450	50.5	7.34	94.65	11	0	1	1.03357e+08	1.06415e+08	1.04737e+08	9.56529e+07	1.01097e+08	1.04416e+08	1.05416e+08	1.05756e+08
A0A452DXP8	Testis, prostate and placenta expressed	TEPP	Testis, prostate and placenta expressed OS=Capra hircus OX=9925 GN=TEPP PE=4 SV=1	55.915	47	14	58	1	217	24.8	9.06	140.78	14	13	1	4.92297e+08	5.37162e+08	5.71629e+08	4.91434e+08	5.3899e+08	5.2356e+08	5.70723e+08	5.99323e+08
A0A452EY56	Proteasome 26S subunit, ATPase 1	PSMC1	Proteasome 26S subunit, ATPase 1 OS=Capra hircus OX=9925 GN=PSMC1 PE=3 SV=1	55.893	29	13	21	11	440	49.2	6.21	61.55	13	2	1	7.2933e+07	7.59989e+07	8.06056e+07	7.99733e+07	7.59974e+07	7.5068e+07	8.52724e+07	8.69311e+07
A0A0C4Y1X3	Capra hircus breed Kapro cytochrome c mRNA	LOC102173997	Capra hircus breed Kapro cytochrome c mRNA OS=Capra hircus OX=9925 GN=LOC102173997 PE=2 SV=1	55.8	62	7	28	6	105	11.7	9.5	87.96	7	0	1	1.38273e+08	1.26618e+08	1.36086e+08	1.43865e+08	1.45925e+08	1.24801e+08	1.24415e+08	1.17339e+08
A0A097P8R4	Glycogen synthase kinase-3 beta	GSK3B1	Glycogen synthase kinase-3 beta OS=Capra hircus OX=9925 GN=GSK3B1 PE=2 SV=1	55.566	32	10	28	7	420	46.7	8.68	79.11	10	3	1	9.91447e+07	9.66273e+07	9.15752e+07	7.97554e+07	9.52594e+07	9.12386e+07	9.53255e+07	8.94891e+07
A0A452G320	Alpha-mannosidase	LOC102173830	Alpha-mannosidase OS=Capra hircus OX=9925 GN=LOC102173830 PE=3 SV=1	55.494	14	12	22	7	994	113.3	7.44	65.9	12	5	1	8.03297e+07	8.63645e+07	7.1546e+07	7.33498e+07	8.90586e+07	8.07996e+07	7.46401e+07	7.45707e+07
A0A452FRG5	Lamin tail domain containing 2	LMNTD2	Lamin tail domain containing 2 OS=Capra hircus OX=9925 GN=LMNTD2 PE=4 SV=1	55.45	11	9	30	9	860	92.3	8.6	91.85	9	0	1	7.11684e+07	7.12774e+07	7.35199e+07	6.43163e+07	7.3077e+07	7.65716e+07	7.48852e+07	7.89431e+07
A0A452E8F7	1-acylglycerol-3-phosphate O-acyltransferase 5	AGPAT5	1-acylglycerol-3-phosphate O-acyltransferase 5 OS=Capra hircus OX=9925 GN=AGPAT5 PE=3 SV=1	55.415	23	10	40	10	395	44.8	9.19	117.4	10	0	1	2.03612e+08	2.10865e+08	2.06557e+08	2.03968e+08	2.06593e+08	2.09579e+08	2.10993e+08	2.1698e+08
A0A452F2L4	Dynein regulatory complex protein 10	IQCD	Dynein regulatory complex protein 10 OS=Capra hircus OX=9925 GN=IQCD PE=3 SV=1	55.405	25	12	24	12	445	51.7	8.78	69.22	12	0	1	5.6972e+07	5.87602e+07	5.76773e+07	7.57618e+07	5.93567e+07	6.76635e+07	5.74486e+07	6.05353e+07
A0A452FW25	Phospholipase B-like	PLBD1	Phospholipase B-like OS=Capra hircus OX=9925 GN=PLBD1 PE=3 SV=1	55.123	23	12	35	12	529	60.9	8.66	104.77	12	0	1	1.96691e+08	1.93555e+08	1.8358e+08	1.5895e+08	1.92424e+08	1.8193e+08	1.92923e+08	1.88164e+08
A9LM10	RAB1A		RAB1A OS=Capra hircus OX=9925 PE=2 SV=1	54.976	40	7	20	3	205	22.7	6.21	72.56	7	2	1	3.91719e+07	4.42004e+07	3.9524e+07	4.16918e+07	4.10608e+07	4.046e+07	4.06584e+07	3.89847e+07
A0A452F2X7	Cysteine desulfurase, mitochondrial	NFS1	Cysteine desulfurase, mitochondrial OS=Capra hircus OX=9925 GN=NFS1 PE=3 SV=1	54.886	28	12	32	12	457	50.3	8.1	91.58	12	0	1	1.28257e+08	1.29954e+08	1.34678e+08	1.15339e+08	1.30013e+08	1.31594e+08	1.28405e+08	1.26716e+08
A0A452FLQ8	RNA helicase	EIF4A1	RNA helicase OS=Capra hircus OX=9925 GN=EIF4A1 PE=3 SV=1	54.855	35	14	27	6	406	46.1	5.48	70.75	14	10	1	1.17622e+08	1.19431e+08	1.19036e+08	1.06659e+08	1.19875e+08	1.23165e+08	1.22841e+08	1.15428e+08
A0A452G6U7	Carbonyl reductase 4	CBR4	Carbonyl reductase 4 OS=Capra hircus OX=9925 GN=CBR4 PE=4 SV=1	54.796	39	7	21	7	237	25.3	9.39	63.95	7	0	1	9.47535e+07	1.05991e+08	1.02502e+08	8.95235e+07	1.02068e+08	9.5658e+07	1.04953e+08	1.05425e+08
A0A452FQ83	Armadillo repeat containing 6	ARMC6	Armadillo repeat containing 6 OS=Capra hircus OX=9925 GN=ARMC6 PE=4 SV=1	54.745	26	12	31	12	468	50.2	6.21	80.45	12	0	1	8.22719e+07	8.81798e+07	8.33162e+07	7.41212e+07	8.35504e+07	8.50413e+07	8.57668e+07	8.61492e+07
A0A452DLN2	Voltage-dependent anion-selective channel protein 3		Voltage-dependent anion-selective channel protein 3 OS=Capra hircus OX=9925 PE=3 SV=1	54.735	26	7	238	2	263	28.7	8.82	645.16	7	0	1	1.46047e+07	1.39527e+07	1.4288e+07	1.15265e+07	1.55097e+07	1.55195e+07	1.50453e+07	1.30741e+07
A0A452FS59	Cell cycle control protein	TMEM30A	Cell cycle control protein OS=Capra hircus OX=9925 GN=TMEM30A PE=3 SV=1	54.701	25	9	43	9	325	36.8	9.2	135.1	9	0	1	2.65398e+08	2.7547e+08	2.73244e+08	2.58964e+08	2.72904e+08	2.59455e+08	2.7337e+08	2.75364e+08
A0A452E9I7	Triacylglycerol lipase	PNLIPRP2	Triacylglycerol lipase OS=Capra hircus OX=9925 GN=PNLIPRP2 PE=3 SV=1	54.657	22	8	46	8	439	48.5	7.59	135.72	8	0	1	2.18791e+08	2.28745e+08	2.22224e+08	2.06957e+08	2.22848e+08	2.4467e+08	2.00625e+08	2.38948e+08
A0A452DZK5	Proteasome subunit alpha type	PSMA5	Proteasome subunit alpha type OS=Capra hircus OX=9925 GN=PSMA5 PE=3 SV=1	54.542	27	6	23	6	241	26.4	4.79	77.39	6	0	1	9.13199e+07	9.97687e+07	1.03305e+08	1.02223e+08	9.80135e+07	9.98639e+07	1.10754e+08	1.12921e+08
A0A452FQJ4	Family with sequence similarity 71 member E1	FAM71E1	Family with sequence similarity 71 member E1 OS=Capra hircus OX=9925 GN=FAM71E1 PE=4 SV=1	54.421	31	5	23	5	215	24.1	5.05	84.66	5	0	1	8.73736e+07	7.92873e+07	8.59048e+07	7.57043e+07	8.77878e+07	7.62144e+07	1.019e+08	8.12657e+07
A0A452FHM3	Glycerol kinase	LOC108633198	Glycerol kinase OS=Capra hircus OX=9925 GN=LOC108633198 PE=4 SV=1	54.262	21	7	147	1	310	34	7.91	407.47	7	0	1	3.42381e+06	2.5214e+06	3.46682e+06	2.244e+06	2.76838e+06	2.93258e+06	2.62312e+06	2.70103e+06
A0A452E2K8	Glycerophosphodiester phosphodiesterase 1	GDE1	Glycerophosphodiester phosphodiesterase 1 OS=Capra hircus OX=9925 GN=GDE1 PE=3 SV=1	54.256	27	10	51	10	331	37.6	6.84	157.55	10	0	1	3.17004e+08	3.31803e+08	3.35201e+08	3.22873e+08	3.26983e+08	3.1418e+08	3.46789e+08	3.51307e+08
A0A452F2B0	Disintegrin and metalloproteinase domain-containing protein 18-like	LOC108634067	Disintegrin and metalloproteinase domain-containing protein 18-like OS=Capra hircus OX=9925 GN=LOC108634067 PE=4 SV=1	54.241	11	6	43	5	641	71.7	7.69	146.97	6	1	1	1.25303e+08	1.16156e+08	1.05925e+08	1.35484e+08	1.27024e+08	1.24022e+08	1.13064e+08	1.16208e+08
A0A452EY51	Nipsnap homolog 3A	NIPSNAP3A	Nipsnap homolog 3A OS=Capra hircus OX=9925 GN=NIPSNAP3A PE=3 SV=1	54.086	33	8	59	8	245	28.6	8.82	157.9	8	0	1	1.87826e+08	2.00215e+08	2.09664e+08	1.90436e+08	2.03695e+08	1.80251e+08	2.09011e+08	2.11317e+08
A0A452EWR7	Proteasome subunit alpha type	PSMA3	Proteasome subunit alpha type OS=Capra hircus OX=9925 GN=PSMA3 PE=3 SV=1	54.024	39	11	32	11	255	28.4	5.33	84.99	11	0	1	9.77845e+07	9.87559e+07	1.09304e+08	1.01556e+08	1.0448e+08	1.04146e+08	1.14889e+08	1.16772e+08
A0A452FHH0	Testis expressed 45	TEX45	Testis expressed 45 OS=Capra hircus OX=9925 GN=TEX45 PE=4 SV=1	53.781	30	15	35	15	497	55.9	8.76	94.08	15	0	1	1.06916e+08	1.03591e+08	1.08334e+08	9.26943e+07	1.16677e+08	1.0958e+08	1.08873e+08	1.07824e+08
A0A452FM90	Chromosome 8 C9orf135 homolog	C9orf135	Chromosome 8 C9orf135 homolog OS=Capra hircus OX=9925 GN=C9orf135 PE=4 SV=1	53.575	32	9	35	9	230	26.4	6.92	95.47	9	0	1	8.94496e+07	9.46184e+07	9.46538e+07	8.14035e+07	9.03499e+07	9.5987e+07	9.846e+07	9.80374e+07
A0A452DNW9	ATPase H+ transporting V1 subunit E2	ATP6V1E2	ATPase H+ transporting V1 subunit E2 OS=Capra hircus OX=9925 GN=ATP6V1E2 PE=3 SV=1	53.509	40	10	34	10	226	26.1	8.65	95.68	10	0	1	1.40915e+08	1.44316e+08	1.45957e+08	1.42474e+08	1.41829e+08	1.37626e+08	1.5252e+08	1.46163e+08
A0A452EGD7	Kruppel like factor 15	CFAP100	Kruppel like factor 15 OS=Capra hircus OX=9925 GN=CFAP100 PE=4 SV=1	53.506	16	9	25	9	602	70.2	6.65	67.51	9	0	1	7.50232e+07	8.12e+07	7.64854e+07	6.39214e+07	7.54293e+07	7.56928e+07	7.62925e+07	7.89111e+07
A0A452E010			Uncharacterized protein OS=Capra hircus OX=9925 PE=4 SV=1	53.497	24	11	22	11	519	58.1	8.59	73.49	11	0	1	5.12448e+07	5.35167e+07	4.83227e+07	4.69623e+07	4.67057e+07	4.94012e+07	5.03077e+07	5.16784e+07
A0A452EV92	Glucosidase alpha, acid	GAA	Glucosidase alpha, acid OS=Capra hircus OX=9925 GN=GAA PE=3 SV=1	53.473	10	8	28	8	935	104.2	5.43	103.04	8	0	1	8.5761e+07	8.52018e+07	7.95473e+07	7.15851e+07	8.78017e+07	8.04071e+07	8.59163e+07	7.97059e+07
A0A452G5H4	Aldehyde dehydrogenase 1 family member A2	ALDH1A2	Aldehyde dehydrogenase 1 family member A2 OS=Capra hircus OX=9925 GN=ALDH1A2 PE=3 SV=1	53.441	23	11	24	9	518	56.6	5.73	79.4	11	2	1	8.35272e+07	8.64125e+07	8.77757e+07	8.567e+07	8.67701e+07	9.00271e+07	9.45348e+07	9.62123e+07
A0A452FNN8	EFR3 homolog A	EFR3A	EFR3 homolog A OS=Capra hircus OX=9925 GN=EFR3A PE=4 SV=1	53.266	20	15	31	15	802	90.9	6.83	88	15	0	1	8.72198e+07	9.51983e+07	8.94466e+07	8.09074e+07	9.19805e+07	8.95345e+07	9.2186e+07	8.94843e+07
A0A452G082			Uncharacterized protein OS=Capra hircus OX=9925 PE=4 SV=1	53.243	27	7	19	7	321	36.6	6.48	67.39	7	0	1	2.72039e+07	2.7997e+07	2.6842e+07	2.42531e+07	2.66114e+07	2.85939e+07	2.73494e+07	2.71312e+07
A0A452FY23	Ubiquitin carboxyl-terminal hydrolase 7	USP7	Ubiquitin carboxyl-terminal hydrolase 7 OS=Capra hircus OX=9925 GN=USP7 PE=3 SV=1	53.143	15	14	28	14	1103	128.4	5.53	81.34	14	0	1	4.98104e+07	4.81161e+07	5.1066e+07	4.51351e+07	5.08367e+07	5.30556e+07	5.35247e+07	5.0624e+07
A0A452EYN6	26S proteasome non-ATPase regulatory subunit 1	PSMD1	26S proteasome non-ATPase regulatory subunit 1 OS=Capra hircus OX=9925 GN=PSMD1 PE=3 SV=1	52.837	18	16	28	16	953	105.8	5.39	68.27	16	0	1	9.29638e+07	1.01547e+08	1.0406e+08	9.86621e+07	9.79209e+07	1.0211e+08	1.12401e+08	1.1323e+08
A0A452DUN3	ATP synthase F1 subunit epsilon	ATP5IF1	ATP synthase F1 subunit epsilon OS=Capra hircus OX=9925 GN=ATP5IF1 PE=3 SV=1	52.79	40	10	110	10	109	12.3	9.41	263.46	10	0	1	2.60433e+09	2.55987e+09	2.31169e+09	2.8294e+09	2.48369e+09	2.80253e+09	2.12844e+09	2.1817e+09
A0A452EFK1	Acyl-CoA dehydrogenase family member 10	LOC102182159	Acyl-CoA dehydrogenase family member 10 OS=Capra hircus OX=9925 GN=LOC102182159 PE=3 SV=1	52.741	11	11	23	3	935	104.4	8.43	71.69	11	0	1	1.10426e+07	1.2792e+07	1.2014e+07	1.07008e+07	1.198e+07	1.08074e+07	1.24132e+07	1.14108e+07
A0A452DYY9	Malonyl-CoA decarboxylase	MLYCD	Malonyl-CoA decarboxylase OS=Capra hircus OX=9925 GN=MLYCD PE=4 SV=1	52.4	23	10	23	10	524	58.2	9.26	86.94	10	0	1	7.18352e+07	7.65518e+07	7.50718e+07	7.47373e+07	7.64577e+07	7.31123e+07	7.38471e+07	7.6511e+07
A0A452EBH4	ATP synthase subunit b	ATP5PB	ATP synthase subunit b OS=Capra hircus OX=9925 GN=ATP5PB PE=3 SV=1	52.29	27	8	42	8	256	28.8	9.32	111.65	8	0	1	9.88e+07	1.04879e+08	1.02939e+08	1.24828e+08	1.19211e+08	1.0726e+08	9.85074e+07	1.00074e+08
A0A452E3L9	Calpain 11	CAPN11	Calpain 11 OS=Capra hircus OX=9925 GN=CAPN11 PE=3 SV=1	52.039	18	11	25	11	694	78.9	5.77	83.92	11	0	1	5.8076e+07	6.27569e+07	5.50017e+07	4.9641e+07	5.58866e+07	5.92155e+07	5.90684e+07	5.96648e+07
A0A452G9E1	Phosphate carrier protein, mitochondrial	SLC25A3	Phosphate carrier protein, mitochondrial OS=Capra hircus OX=9925 GN=SLC25A3 PE=3 SV=1	52.011	24	11	60	8	362	40.1	9.36	168.27	11	0	1	3.08953e+08	3.38279e+08	3.50415e+08	3.00126e+08	3.22684e+08	3.03082e+08	3.68552e+08	3.70215e+08
A0A6G9KHD8	DnaJ heat shock protein family Hsp40 member B3	DNAJB3	DnaJ heat shock protein family Hsp40 member B3 OS=Capra hircus OX=9925 GN=DNAJB3 PE=4 SV=1	52.006	38	10	31	8	242	26.8	5.62	82.98	10	3	1	9.78698e+07	1.05171e+08	9.83337e+07	8.93807e+07	1.00499e+08	1.04704e+08	1.01669e+08	9.47546e+07
A0A452FLK7	ATP synthase-coupling factor 6, mitochondrial	ATP5PF	ATP synthase-coupling factor 6, mitochondrial OS=Capra hircus OX=9925 GN=ATP5PF PE=3 SV=1	51.735	50	6	24	6	108	12.5	9.31	86.41	6	0	1	9.28872e+07	9.48423e+07	9.48801e+07	8.01266e+07	8.86854e+07	7.48177e+07	8.44082e+07	1.00401e+08
A0A452FIH2	DLEC1 cilia and flagella associated protein	DLEC1	DLEC1 cilia and flagella associated protein OS=Capra hircus OX=9925 GN=DLEC1 PE=4 SV=1	51.611	8	13	24	13	1718	191.6	6.46	71.74	13	0	1	5.31447e+07	5.68745e+07	5.55764e+07	4.77517e+07	5.36956e+07	5.50416e+07	5.55708e+07	5.63897e+07
A0A452GBK7	Complement component 1 Q subcomponent-binding protein, mitochondrial	C1QBP	Complement component 1 Q subcomponent-binding protein, mitochondrial OS=Capra hircus OX=9925 GN=C1QBP PE=3 SV=1	51.385	22	5	18	5	278	30.5	4.72	69.66	5	0	1	8.06522e+07	8.78516e+07	7.89052e+07	7.14469e+07	7.98318e+07	6.84543e+07	7.6885e+07	7.22968e+07
A0A452FTM6	ATP binding cassette subfamily B member 8	ABCB8	ATP binding cassette subfamily B member 8 OS=Capra hircus OX=9925 GN=ABCB8 PE=4 SV=1	51.19	22	13	20	13	713	77.3	9.51	47.95	13	0	1	1.05293e+08	9.51096e+07	1.00967e+08	1.01043e+08	9.73424e+07	1.01026e+08	1.0225e+08	9.94254e+07
A0A452FKI3	UTP--glucose-1-phosphate uridylyltransferase	UGP2	UTP--glucose-1-phosphate uridylyltransferase OS=Capra hircus OX=9925 GN=UGP2 PE=3 SV=1	51.165	24	10	23	10	504	56.3	7.9	78.59	10	0	1	6.33628e+07	6.29115e+07	6.40796e+07	7.3694e+07	6.49295e+07	6.49693e+07	6.83153e+07	6.7077e+07
A0A452GB25	NADH dehydrogenase [ubiquinone] 1 alpha subcomplex subunit 2	NDUFA2	NADH dehydrogenase [ubiquinone] 1 alpha subcomplex subunit 2 OS=Capra hircus OX=9925 GN=NDUFA2 PE=3 SV=1	51.072	58	7	40	7	99	11.1	9.91	133.79	7	0	1	1.71724e+08	1.89396e+08	2.03049e+08	2.13785e+08	2.07486e+08	1.66605e+08	1.95046e+08	2.23675e+08
A0A452G9S7	Glutathione S-transferase	LOC100861222	Glutathione S-transferase OS=Capra hircus OX=9925 GN=LOC100861222 PE=3 SV=1	50.931	38	8	78	3	216	25.4	6.23	219.24	8	2	1	7.6586e+06	7.60426e+06	7.6256e+06	9.1105e+06	8.7194e+06	7.75332e+06	7.66359e+06	7.68415e+06
A0A452DQ45	Armadillo repeat containing 12	ARMC12	Armadillo repeat containing 12 OS=Capra hircus OX=9925 GN=ARMC12 PE=4 SV=1	50.812	26	8	77	8	338	38.1	8.37	236.28	8	0	1	6.87808e+08	6.86185e+08	7.81011e+08	7.39182e+08	7.72346e+08	6.93073e+08	8.16086e+08	8.56216e+08
A0A452FCA8	Acyl-CoA dehydrogenase family member 10	LOC102181144	Acyl-CoA dehydrogenase family member 10 OS=Capra hircus OX=9925 GN=LOC102181144 PE=3 SV=1	50.611	10	11	27	3	1055	117.6	7.65	76.14	11	8	1	7.88226e+07	9.90446e+07	8.31132e+07	7.95273e+07	8.51327e+07	8.08832e+07	8.2136e+07	8.74841e+07
A0A1S6YER7	NADH-ubiquinone oxidoreductase chain 5	ND5	NADH-ubiquinone oxidoreductase chain 5 OS=Capra hircus OX=9925 GN=ND5 PE=3 SV=1	50.57	10	6	25	6	606	68.3	9.13	72.37	6	0	1	1.17489e+08	1.31791e+08	1.20545e+08	1.08025e+08	1.16344e+08	1.07026e+08	1.23013e+08	1.25109e+08
A0A452F9J1	FUN14 domain containing 2	FUNDC2	FUN14 domain containing 2 OS=Capra hircus OX=9925 GN=FUNDC2 PE=3 SV=1	50.458	55	4	37	2	95	10.2	6.02	134.4	4	0	1	5.82968e+07	6.02481e+07	5.97137e+07	5.28127e+07	6.16221e+07	5.19973e+07	6.4181e+07	6.03919e+07
A0A452G3E1	Nudix hydrolase 18	NUDT18	Nudix hydrolase 18 OS=Capra hircus OX=9925 GN=NUDT18 PE=3 SV=1	50.315	33	9	19	9	323	35.7	7.4	46.82	9	0	1	4.57975e+07	4.60923e+07	4.64609e+07	4.6028e+07	4.92916e+07	5.24489e+07	4.92877e+07	5.1234e+07
A0A452G6U9	Spermatogenesis associated 17	SPATA17	Spermatogenesis associated 17 OS=Capra hircus OX=9925 GN=SPATA17 PE=4 SV=1	50.274	30	12	31	12	362	43.2	9.76	82.92	12	0	1	7.9842e+07	1.07075e+08	9.0287e+07	9.20129e+07	9.50948e+07	8.86893e+07	8.8264e+07	9.96579e+07
A0A452DSP4	Protein chibby homolog 2	CBY2	Protein chibby homolog 2 OS=Capra hircus OX=9925 GN=CBY2 PE=3 SV=1	49.913	29	11	27	11	421	48.3	6.73	79.61	11	0	1	7.63155e+07	7.56515e+07	8.09941e+07	7.37884e+07	7.71099e+07	7.80789e+07	7.86549e+07	7.83174e+07
A0A452EMY0	Transcription factor A, mitochondrial	TFAM	Transcription factor A, mitochondrial OS=Capra hircus OX=9925 GN=TFAM PE=4 SV=1	49.879	48	14	34	14	246	28.7	9.77	92.54	14	0	1	1.89942e+08	1.89608e+08	1.93745e+08	1.81753e+08	2.10014e+08	1.89171e+08	1.85974e+08	1.97644e+08
A0A452EMU4	Transmembrane protein 38B	TMEM38B	Transmembrane protein 38B OS=Capra hircus OX=9925 GN=TMEM38B PE=3 SV=1	49.707	20	4	33	4	291	32.6	9.29	115.86	4	0	1	2.87482e+08	2.71652e+08	2.9326e+08	3.1186e+08	2.91869e+08	2.83147e+08	3.19745e+08	3.03414e+08
A0A452G6H8	Phospholipid-transporting ATPase	LOC102178625	Phospholipid-transporting ATPase OS=Capra hircus OX=9925 GN=LOC102178625 PE=3 SV=1	49.538	12	13	27	12	1142	130.6	7.62	80.21	13	0	1	6.51937e+07	6.58691e+07	6.78343e+07	5.95362e+07	6.78985e+07	6.69508e+07	6.92117e+07	6.90045e+07
A0A452DZU6	BCS1-like protein	BCS1L	BCS1-like protein OS=Capra hircus OX=9925 GN=BCS1L PE=3 SV=1	49.373	24	9	32	9	419	47.4	8.72	111.29	9	0	1	9.13076e+07	9.45871e+07	9.50269e+07	8.69885e+07	8.66095e+07	9.24194e+07	9.39271e+07	9.47057e+07
A0A452F651			Uncharacterized protein OS=Capra hircus OX=9925 PE=4 SV=1	49.366	7	11	19	11	1526	170.8	7.53	57.23	11	0	1	5.79613e+07	5.97184e+07	5.79755e+07	4.63541e+07	5.69679e+07	5.8544e+07	5.91249e+07	6.00104e+07
D7R6C7	Sperm acrosome membrane-associated protein 3	SLLP1	Sperm acrosome membrane-associated protein 3 OS=Capra hircus OX=9925 GN=SLLP1 PE=2 SV=1	49.328	31	5	69	5	163	18	5.85	214.13	5	0	1	1.3086e+09	1.25242e+09	1.08511e+09	1.12352e+09	1.07254e+09	9.05843e+08	1.01428e+09	8.99494e+08
A0A452F3B4			Uncharacterized protein OS=Capra hircus OX=9925 PE=4 SV=1	49.317	8	11	49	1	1317	144.9	7.05	167.49	11	0	1	5.49792e+07	4.11208e+07	4.17e+07	3.15294e+07	4.93105e+07	4.46945e+07	6.65485e+07	3.67125e+07
A0A452DY56	Testis expressed 37	TEX37	Testis expressed 37 OS=Capra hircus OX=9925 GN=TEX37 PE=4 SV=1	49.221	39	6	37	6	180	20.5	6.86	121.9	6	0	1	1.46961e+08	1.53303e+08	1.68746e+08	1.75201e+08	1.70861e+08	1.52799e+08	1.56598e+08	1.74831e+08
A0A452EW53	Reticulocalbin 2	RCN2	Reticulocalbin 2 OS=Capra hircus OX=9925 GN=RCN2 PE=4 SV=1	49.168	31	9	23	9	317	36.9	4.4	75.31	9	0	1	9.16389e+07	9.13178e+07	8.68344e+07	6.665e+07	8.42673e+07	8.62513e+07	7.61656e+07	7.42775e+07
A0A452FVD2	Family with sequence similarity 71 member D	FAM71D	Family with sequence similarity 71 member D OS=Capra hircus OX=9925 GN=FAM71D PE=4 SV=1	49.041	25	9	47	9	389	43.3	4.81	127.08	9	0	1	2.96966e+08	2.2969e+08	2.59925e+08	1.85424e+08	2.8076e+08	2.66231e+08	3.38361e+08	2.38673e+08
A0A452EFM7	Serine active site containing 1	SERAC1	Serine active site containing 1 OS=Capra hircus OX=9925 GN=SERAC1 PE=4 SV=1	48.932	16	11	29	11	654	74	7.55	77.41	11	0	1	6.5517e+07	6.43336e+07	6.91237e+07	6.30035e+07	6.99521e+07	7.12764e+07	7.3701e+07	7.25605e+07
A0A452EDT2	Dynein axonemal light chain 1	DNAL1	Dynein axonemal light chain 1 OS=Capra hircus OX=9925 GN=DNAL1 PE=4 SV=1	48.907	36	8	45	8	210	23.8	6.38	129.81	8	0	1	1.74034e+08	1.78122e+08	1.87468e+08	2.30631e+08	1.95744e+08	1.72007e+08	1.77161e+08	1.90173e+08
A0A452DNE2	Dynein heavy chain domain 1	DNHD1	Dynein heavy chain domain 1 OS=Capra hircus OX=9925 GN=DNHD1 PE=3 SV=1	48.885	3	14	21	14	4705	527.2	7.12	62.91	14	0	1	3.70578e+07	3.84211e+07	3.86932e+07	3.46523e+07	3.73556e+07	4.02648e+07	3.76485e+07	4.0528e+07
A0A452F6T4	WD repeat domain 64	WDR64	WD repeat domain 64 OS=Capra hircus OX=9925 GN=WDR64 PE=4 SV=1	48.855	26	11	24	1	382	43.6	8.37	75.47	11	0	1	1.78092e+06	1.95733e+06	1.84115e+06	1.70823e+06	1.85735e+06	1.86163e+06	2.08464e+06	2.21418e+06
A0A452G469	Tetratricopeptide repeat domain 29	TTC29	Tetratricopeptide repeat domain 29 OS=Capra hircus OX=9925 GN=TTC29 PE=4 SV=1	48.702	20	9	31	9	476	54.8	6.04	96.37	9	0	1	1.43825e+08	1.51929e+08	1.50664e+08	1.43543e+08	1.46954e+08	1.49247e+08	1.49415e+08	1.51687e+08
A0A452FSH4	ATP-citrate synthase	ACLY	ATP-citrate synthase OS=Capra hircus OX=9925 GN=ACLY PE=3 SV=1	48.646	10	12	26	12	1091	119.8	7.24	74.35	12	0	1	6.55234e+07	6.82841e+07	7.01999e+07	7.98739e+07	6.06312e+07	7.16461e+07	7.87115e+07	7.98074e+07
F2X044	Lysozyme-like 4	LYZL4	Lysozyme-like 4 OS=Capra hircus OX=9925 GN=LYZL4 PE=2 SV=1	48.501	22	3	81	3	145	16.4	8.12	214.94	3	0	1	4.98184e+08	4.67082e+08	4.9991e+08	4.73517e+08	5.29249e+08	4.97353e+08	5.07008e+08	5.02926e+08
A0A452G6G9	ER lipid raft associated 2	ERLIN2	ER lipid raft associated 2 OS=Capra hircus OX=9925 GN=ERLIN2 PE=3 SV=1	48.469	26	9	31	7	338	37.6	5.49	98.62	9	2	1	1.73602e+08	1.78121e+08	1.73655e+08	1.72502e+08	1.64894e+08	1.69923e+08	1.81461e+08	1.85125e+08
A0A452DMP4	AarF domain containing kinase 5	ADCK5	AarF domain containing kinase 5 OS=Capra hircus OX=9925 GN=ADCK5 PE=3 SV=1	48.056	21	11	27	11	594	67.3	8.43	74.41	11	0	1	5.31691e+07	5.5116e+07	5.51243e+07	5.56432e+07	5.57462e+07	5.55146e+07	5.4794e+07	5.7075e+07
A0A452E471	Solute carrier family 2, facilitated glucose transporter member 5	LOC102178379	Solute carrier family 2, facilitated glucose transporter member 5 OS=Capra hircus OX=9925 GN=LOC102178379 PE=3 SV=1	47.952	12	6	32	1	445	49.3	7.64	104.4	6	0	1	1.9187e+07	2.06614e+07	1.9427e+07	1.62958e+07	1.99036e+07	1.99887e+07	1.94202e+07	1.88347e+07
A0A452G3A6	Zona pellucida binding protein 2	ZPBP2	Zona pellucida binding protein 2 OS=Capra hircus OX=9925 GN=ZPBP2 PE=3 SV=1	47.951	23	6	47	6	329	37.4	7.99	110.68	6	0	1	1.86459e+08	1.93958e+08	1.83424e+08	1.82068e+08	1.8952e+08	2.0129e+08	1.87179e+08	1.8794e+08
A0A452EPM9	Leucine zipper and EF-hand containing transmembrane protein 2	LETM2	Leucine zipper and EF-hand containing transmembrane protein 2 OS=Capra hircus OX=9925 GN=LETM2 PE=4 SV=1	47.805	25	10	21	10	454	52	9.7	63.28	10	0	1	7.15099e+07	7.74758e+07	7.49442e+07	6.97909e+07	7.41418e+07	6.79646e+07	7.87576e+07	8.28675e+07
A0A452FF98	Hormone-sensitive lipase	LIPE	Hormone-sensitive lipase OS=Capra hircus OX=9925 GN=LIPE PE=3 SV=1	47.541	17	11	42	11	756	82.6	6.77	129.99	11	0	1	1.58303e+08	1.64488e+08	1.70367e+08	1.5088e+08	1.76815e+08	1.73183e+08	1.90457e+08	1.92204e+08
A0A452FCM6	Beta-hexosaminidase	HEXA	Beta-hexosaminidase OS=Capra hircus OX=9925 GN=HEXA PE=3 SV=1	47.448	19	10	41	9	529	60.3	6.01	119.01	10	1	1	2.69872e+08	2.80187e+08	2.823e+08	2.53203e+08	2.85694e+08	2.83006e+08	2.87331e+08	2.82672e+08
A0A452E2I7	28S ribosomal protein S36, mitochondrial	LOC108633249	28S ribosomal protein S36, mitochondrial OS=Capra hircus OX=9925 GN=LOC108633249 PE=4 SV=1	47.306	54	5	22	5	103	11.6	10.2	79.06	5	0	1	7.14002e+07	7.85812e+07	7.89656e+07	9.09611e+07	7.27025e+07	6.62423e+07	7.60779e+07	8.32413e+07
A0A452EF34	Vesicle associated membrane protein 3	VAMP3	Vesicle associated membrane protein 3 OS=Capra hircus OX=9925 GN=VAMP3 PE=4 SV=1	47.274	38	3	22	3	104	11.5	8.79	85.96	3	0	1	6.75582e+07	6.29786e+07	6.79688e+07	6.4852e+07	7.17241e+07	7.39124e+07	7.25443e+07	7.17034e+07
A0A452EQX6	Diazepam binding inhibitor, acyl-CoA binding protein	DBI	Diazepam binding inhibitor, acyl-CoA binding protein OS=Capra hircus OX=9925 GN=DBI PE=4 SV=1	47.268	59	5	30	5	87	10	6.79	92.19	5	0	1	2.01898e+08	2.23367e+08	2.3078e+08	2.3645e+08	2.17317e+08	1.78403e+08	2.29469e+08	2.50012e+08
A0A452E8A3	Complex I-ESSS	NDUFB11	Complex I-ESSS OS=Capra hircus OX=9925 GN=NDUFB11 PE=3 SV=1	46.966	51	6	31	6	154	17.4	5.39	85.3	6	0	1	7.22293e+07	7.43051e+07	7.37104e+07	7.4957e+07	7.39454e+07	8.37353e+07	7.41811e+07	7.82516e+07
A0A452E8P0	Testis specific serine kinase 4	TSSK4	Testis specific serine kinase 4 OS=Capra hircus OX=9925 GN=TSSK4 PE=3 SV=1	46.922	26	10	43	10	326	37.2	8.75	126.91	10	0	1	2.08671e+08	2.08219e+08	2.1177e+08	1.93932e+08	2.15802e+08	2.25942e+08	2.05216e+08	2.0704e+08
A0A452G855	Protein disulfide-isomerase	P4HB	Protein disulfide-isomerase OS=Capra hircus OX=9925 GN=P4HB PE=3 SV=1	46.686	24	12	27	12	507	56.7	4.98	78.23	12	0	1	5.79532e+07	6.207e+07	5.70575e+07	1.29004e+08	5.38572e+07	6.69984e+07	5.7408e+07	5.63331e+07
A0A452ESE0	Signal-regulatory protein beta-1	LOC102171800	Signal-regulatory protein beta-1 OS=Capra hircus OX=9925 GN=LOC102171800 PE=4 SV=1	46.387	33	9	38	9	286	31.4	9.13	110.39	9	0	1	3.6684e+08	3.64849e+08	3.68235e+08	3.35853e+08	3.53317e+08	3.29035e+08	3.75976e+08	3.62549e+08
A0A452EAQ3	Aldo-keto reductase family 1 member B	AKR1B1	Aldo-keto reductase family 1 member B OS=Capra hircus OX=9925 GN=AKR1B1 PE=3 SV=1	46.346	29	10	30	8	316	35.9	6.24	86.8	10	2	1	2.06795e+08	2.03664e+08	2.23599e+08	2.06392e+08	2.40846e+08	2.22239e+08	2.43428e+08	2.57214e+08
A0A452FY24	GCN1 activator of EIF2AK4	GCN1	GCN1 activator of EIF2AK4 OS=Capra hircus OX=9925 GN=GCN1 PE=3 SV=1	46.343	6	15	19	15	2657	290.7	7.31	56.6	15	0	1	3.10544e+07	3.47674e+07	3.21632e+07	2.77841e+07	3.27496e+07	3.46476e+07	3.23946e+07	3.21087e+07
A0A452FGE8	Transmembrane protein 210	TMEM210	Transmembrane protein 210 OS=Capra hircus OX=9925 GN=TMEM210 PE=4 SV=1	46.264	17	3	137	3	143	15	4.67	406.01	3	0	1	1.09122e+09	9.70214e+08	9.7788e+08	9.32132e+08	1.03638e+09	9.43865e+08	1.08279e+09	9.79731e+08
A0A452E3S8	Histone deacetylase 11	HDAC11	Histone deacetylase 11 OS=Capra hircus OX=9925 GN=HDAC11 PE=4 SV=1	46.139	31	8	16	8	346	38.8	7.58	48.61	8	0	1	4.32214e+07	4.48376e+07	4.3749e+07	3.96286e+07	4.45787e+07	4.44412e+07	4.53014e+07	4.62137e+07
A0A452ECI1	NAD kinase 2, mitochondrial	NADK2	NAD kinase 2, mitochondrial OS=Capra hircus OX=9925 GN=NADK2 PE=3 SV=1	45.996	26	9	19	9	442	49.5	7.65	54.95	9	0	1	5.29614e+07	5.63652e+07	5.45146e+07	5.55714e+07	5.40393e+07	5.69e+07	5.4397e+07	5.62058e+07
A0A452G3P8	Cilia and flagella associated protein 20	CFAP20	Cilia and flagella associated protein 20 OS=Capra hircus OX=9925 GN=CFAP20 PE=4 SV=1	45.993	30	5	46	5	193	22.7	9.76	170.42	5	0	1	1.27521e+08	1.45834e+08	1.40386e+08	1.35478e+08	1.30022e+08	1.20798e+08	1.40104e+08	1.4952e+08
A0A452EJE6	Haloacid dehalogenase like hydrolase domain containing 5	HDHD5	Haloacid dehalogenase like hydrolase domain containing 5 OS=Capra hircus OX=9925 GN=HDHD5 PE=4 SV=1	45.926	19	6	21	6	390	42.4	7.18	69.8	6	0	1	2.16803e+07	2.28139e+07	2.30301e+07	2.07549e+07	2.29151e+07	2.20223e+07	2.39179e+07	2.35339e+07
A0A452FWV9	EF-hand calcium binding domain 3	EFCAB3	EF-hand calcium binding domain 3 OS=Capra hircus OX=9925 GN=EFCAB3 PE=4 SV=1	45.861	24	11	45	11	438	50.2	9.44	123.19	11	0	1	2.89452e+08	2.80576e+08	2.87625e+08	2.46823e+08	2.8302e+08	2.87927e+08	2.95482e+08	3.033e+08
A0A452EQ40	MORN repeat containing 3	MORN3	MORN repeat containing 3 OS=Capra hircus OX=9925 GN=MORN3 PE=4 SV=1	45.809	35	8	21	8	240	27.7	7.44	69.02	8	0	1	3.55297e+07	3.65273e+07	3.46797e+07	3.47492e+07	3.51268e+07	3.56218e+07	3.56578e+07	3.48837e+07
A0A452DXZ5	Testis, prostate and placenta expressed	TEPP	Testis, prostate and placenta expressed OS=Capra hircus OX=9925 GN=TEPP PE=4 SV=1	45.602	58	14	54	1	210	23.9	8.65	125.82	14	0	1	1.74763e+06	1.71687e+06	1.75142e+06	1.97053e+06	1.83856e+06	1.86828e+06	1.82033e+06	1.87848e+06
A0A452EQ86	Solute carrier family 25 member 32	SLC25A32	Solute carrier family 25 member 32 OS=Capra hircus OX=9925 GN=SLC25A32 PE=3 SV=1	45.476	25	8	21	8	317	35.6	9.16	63.37	8	0	1	1.87309e+08	1.95073e+08	1.97113e+08	1.73731e+08	2.00209e+08	1.80254e+08	1.99694e+08	2.03392e+08
A0A452F8N6			Uncharacterized protein OS=Capra hircus OX=9925 PE=4 SV=1	45.474	30	10	30	10	313	35.7	8.29	94.42	10	0	1	7.02745e+07	7.24536e+07	6.95293e+07	6.64572e+07	7.25643e+07	6.69106e+07	6.75635e+07	7.00822e+07
A0A452F6E3	Fructose transporter	LOC106501911	Fructose transporter OS=Capra hircus OX=9925 GN=LOC106501911 PE=3 SV=1	45.198	11	6	51	1	477	52.8	8.18	146.92	6	5	1	8.65753e+08	8.92276e+08	8.6692e+08	8.14491e+08	8.94303e+08	7.98971e+08	8.55204e+08	8.28254e+08
A0A452FJM9	Acyl-CoA synthetase long chain family member 3	ACSL3	Acyl-CoA synthetase long chain family member 3 OS=Capra hircus OX=9925 GN=ACSL3 PE=4 SV=1	45.188	15	8	19	8	720	80.1	8.38	53.84	8	0	1	5.40298e+07	5.60785e+07	5.46474e+07	5.31184e+07	5.67355e+07	5.74228e+07	5.47837e+07	5.50076e+07
A9LM13	Ras-related protein Rab-14	rab14	Ras-related protein Rab-14 OS=Capra hircus OX=9925 GN=rab14 PE=2 SV=1	45.116	43	8	22	7	215	23.9	6.21	73.16	8	0	1	5.64096e+07	5.86887e+07	6.11585e+07	6.56654e+07	6.35802e+07	5.78358e+07	6.67153e+07	6.99297e+07
A0A452FJZ6	L-2-hydroxyglutarate dehydrogenase	L2HGDH	L-2-hydroxyglutarate dehydrogenase OS=Capra hircus OX=9925 GN=L2HGDH PE=4 SV=1	45.069	27	11	28	11	463	51	8.81	82.1	11	0	1	7.62447e+07	1.06008e+08	7.86719e+07	7.9208e+07	8.34982e+07	8.2845e+07	7.79255e+07	7.97744e+07
A0A452F3L9	Sterile alpha motif domain containing 15	SAMD15	Sterile alpha motif domain containing 15 OS=Capra hircus OX=9925 GN=SAMD15 PE=4 SV=1	45.059	21	13	22	13	652	74.9	4.59	58.08	13	0	1	9.73773e+07	1.2918e+08	9.2834e+07	9.94914e+07	1.06024e+08	9.75524e+07	9.24078e+07	9.49139e+07
A0A452F938	Leucine rich repeats and IQ motif containing 4	LRRIQ4	Leucine rich repeats and IQ motif containing 4 OS=Capra hircus OX=9925 GN=LRRIQ4 PE=4 SV=1	44.964	17	8	23	8	558	63.7	8.59	84.8	8	0	1	5.8689e+07	6.41703e+07	6.44359e+07	5.98981e+07	6.32897e+07	6.30254e+07	6.2659e+07	6.54647e+07
A0A452FU92	Solute carrier family 25 member 24	SLC25A24	Solute carrier family 25 member 24 OS=Capra hircus OX=9925 GN=SLC25A24 PE=3 SV=1	44.911	23	13	40	3	477	53.3	7.74	120	13	11	1	1.52172e+08	1.58207e+08	1.60572e+08	1.59463e+08	1.5591e+08	1.44013e+08	1.58157e+08	1.59772e+08
A0A452GAN2	RBR-type E3 ubiquitin transferase	ARIH2	RBR-type E3 ubiquitin transferase OS=Capra hircus OX=9925 GN=ARIH2 PE=4 SV=1	44.892	14	7	13	7	491	57.5	5.77	48.37	7	0	1	1.67476e+07	1.8425e+07	1.73338e+07	1.60132e+07	1.73093e+07	1.81884e+07	1.74801e+07	1.76575e+07
A0A452ETA1	Tyrosine 3-monooxygenase/tryptophan 5-monooxygenase activation protein beta	YWHAB	Tyrosine 3-monooxygenase/tryptophan 5-monooxygenase activation protein beta OS=Capra hircus OX=9925 GN=YWHAB PE=3 SV=1	44.702	33	9	40	2	246	28.1	4.83	100.07	9	0	1	1.6581e+06	1.57668e+06	1.64351e+06	1.43552e+06	1.67992e+06	1.6503e+06	1.6111e+06	1.53406e+06
A0A452FS09	ATP-dependent Clp protease proteolytic subunit	CLPP	ATP-dependent Clp protease proteolytic subunit OS=Capra hircus OX=9925 GN=CLPP PE=3 SV=1	44.683	25	6	23	6	272	29.7	8.16	86.1	6	0	1	2.47311e+07	2.6297e+07	2.56012e+07	2.82331e+07	2.75291e+07	2.47917e+07	2.40808e+07	2.42651e+07
A0A452EHC3	Small monomeric GTPase	RALA	Small monomeric GTPase OS=Capra hircus OX=9925 GN=RALA PE=3 SV=1	44.329	24	5	19	4	206	23.5	7.11	74.88	5	2	1	5.54759e+07	6.06567e+07	5.58764e+07	5.33036e+07	5.83608e+07	5.4063e+07	5.85069e+07	5.89464e+07
A0A452G2X2	CDP-diacylglycerol--glycerol-3-phosphate 3-phosphatidyltransferase	PGS1	CDP-diacylglycerol--glycerol-3-phosphate 3-phosphatidyltransferase OS=Capra hircus OX=9925 GN=PGS1 PE=3 SV=1	44.275	17	7	22	7	556	62.6	9.2	69.38	7	0	1	6.83033e+07	6.82095e+07	7.26056e+07	6.15434e+07	7.38111e+07	7.12424e+07	7.44897e+07	7.26794e+07
A0A452F3L4	ABC transporter domain-containing protein		ABC transporter domain-containing protein OS=Capra hircus OX=9925 PE=4 SV=1	44.274	35	5	34	5	167	18.8	8.56	112.06	5	0	1	8.14675e+07	8.4582e+07	7.93473e+07	7.5919e+07	8.30634e+07	7.91574e+07	7.89495e+07	7.96904e+07
A0A452G993	Adenosylhomocysteinase	AHCY	Adenosylhomocysteinase OS=Capra hircus OX=9925 GN=AHCY PE=3 SV=1	44.273	23	10	23	10	429	47.2	5.81	74.34	10	0	1	3.66413e+07	4.20424e+07	3.77637e+07	8.44579e+07	3.59834e+07	4.39629e+07	3.89043e+07	3.91231e+07
A0A452DWP9	Aldehyde dehydrogenase (NAD(+))	ALDH7A1	Aldehyde dehydrogenase (NAD(+)) OS=Capra hircus OX=9925 GN=ALDH7A1 PE=3 SV=1	44.27	19	10	20	10	539	58.6	7.09	58.83	10	0	1	6.56822e+07	6.77503e+07	6.25436e+07	6.71604e+07	5.83432e+07	6.67682e+07	6.16321e+07	6.24767e+07
A0A452EP10	Keratin, type II cytoskeletal 71	KRT71	Keratin, type II cytoskeletal 71 OS=Capra hircus OX=9925 GN=KRT71 PE=3 SV=1	44.197	14	7	32	2	489	54.5	7.28	90.57	7	0	1	6.64405e+06	6.7661e+06	7.33552e+06	4.87631e+06	7.94337e+06	9.42272e+06	1.00853e+07	6.69778e+06
A0A452FU26	3-hydroxyisobutyryl-CoA hydrolase, mitochondrial	HIBCH	3-hydroxyisobutyryl-CoA hydrolase, mitochondrial OS=Capra hircus OX=9925 GN=HIBCH PE=3 SV=1	44.168	28	10	20	10	380	42.6	6.73	64.71	10	0	1	7.74594e+07	7.69338e+07	7.60555e+07	7.65662e+07	5.10293e+07	7.53097e+07	7.86477e+07	8.2835e+07
A0A452G0Y2	Leucine rich repeat containing 34	LRRC34	Leucine rich repeat containing 34 OS=Capra hircus OX=9925 GN=LRRC34 PE=4 SV=1	44.097	22	8	19	8	451	49.7	6.58	61.45	8	0	1	4.20535e+07	4.33019e+07	4.42926e+07	3.97188e+07	4.26749e+07	4.34769e+07	4.40997e+07	4.46563e+07
A0A452DL09	Thioredoxin-disulfide reductase	TXNRD2	Thioredoxin-disulfide reductase OS=Capra hircus OX=9925 GN=TXNRD2 PE=3 SV=1	44.055	20	10	35	10	500	53.6	8.35	106.56	10	0	1	1.50348e+08	1.53279e+08	1.54779e+08	1.34356e+08	1.50808e+08	1.60663e+08	1.55174e+08	1.56675e+08
A0A452FAY7	Acyl-CoA synthetase long chain family member 5	ACSL5	Acyl-CoA synthetase long chain family member 5 OS=Capra hircus OX=9925 GN=ACSL5 PE=4 SV=1	44.018	13	11	21	9	683	75.5	7.58	60.47	11	1	1	3.68535e+07	3.99458e+07	3.93438e+07	3.83478e+07	3.9017e+07	4.00106e+07	3.89946e+07	4.04096e+07
A0A452E0J6	Sperm acrosome associated 4	SPACA4	Sperm acrosome associated 4 OS=Capra hircus OX=9925 GN=SPACA4 PE=4 SV=1	43.979	33	2	15	2	126	13	5.63	74.81	2	0	1	7.94458e+07	9.38215e+07	6.99292e+07	1.35567e+08	7.46262e+07	8.02496e+07	7.34751e+07	7.68897e+07
A0A452DYR5	IQ motif containing H	IQCH	IQ motif containing H OS=Capra hircus OX=9925 GN=IQCH PE=4 SV=1	43.88	9	7	16	7	966	110.7	9.26	49.1	7	0	1	5.19212e+07	5.78395e+07	5.45739e+07	5.35847e+07	5.64381e+07	5.12648e+07	5.57634e+07	5.66617e+07
A0A452FCU3	Retinol dehydrogenase 11	RDH11	Retinol dehydrogenase 11 OS=Capra hircus OX=9925 GN=RDH11 PE=3 SV=1	43.816	17	6	23	6	329	36.6	9.39	68.11	6	0	1	1.98281e+08	2.0419e+08	2.14096e+08	2.06523e+08	2.16716e+08	1.91204e+08	2.18049e+08	2.34303e+08
D3K382	Protein disulfide-isomerase	Pdia3	Protein disulfide-isomerase OS=Capra hircus OX=9925 GN=Pdia3 PE=2 SV=1	43.625	21	11	17	11	505	57	6.65	55.64	11	0	1	4.78082e+07	4.81276e+07	4.83483e+07	4.24135e+07	4.67184e+07	5.07781e+07	4.82921e+07	4.74718e+07
A0A452EDF2	HtrA serine peptidase 2	HTRA2	HtrA serine peptidase 2 OS=Capra hircus OX=9925 GN=HTRA2 PE=3 SV=1	43.604	19	9	22	9	458	49	9.96	77.94	9	0	1	7.87971e+07	8.19486e+07	7.92345e+07	7.52197e+07	7.86445e+07	7.07873e+07	7.88101e+07	7.86043e+07
A0A452E4M9	Ankyrin and armadillo repeat containing	ANKAR	Ankyrin and armadillo repeat containing OS=Capra hircus OX=9925 GN=ANKAR PE=4 SV=1	43.496	8	12	22	12	1453	163.8	7.96	67.48	12	0	1	9.52648e+07	9.8293e+07	9.99486e+07	8.86616e+07	9.94109e+07	9.87004e+07	1.00298e+08	1.06928e+08
A0A452F7M5	Proteasome subunit alpha type	PSMA8	Proteasome subunit alpha type OS=Capra hircus OX=9925 GN=PSMA8 PE=3 SV=1	43.405	40	9	27	6	250	27.9	9	82.24	9	3	1	1.11476e+08	9.68949e+07	1.17159e+08	9.75884e+07	9.63856e+07	1.01332e+08	1.26417e+08	1.3017e+08
A0A452E4S7	Keratin, type I cytoskeletal 17	KRT17	Keratin, type I cytoskeletal 17 OS=Capra hircus OX=9925 GN=KRT17 PE=3 SV=1	43.272	21	11	43	1	448	49.2	5.1	125.44	11	0	1	1.90038e+06	1.64151e+06	1.99023e+06	1.55968e+06	2.01348e+06	1.85303e+06	5.20418e+06	1.36897e+06
A0A452EZL5	Proteasome 26S subunit, ATPase 6	PSMC6	Proteasome 26S subunit, ATPase 6 OS=Capra hircus OX=9925 GN=PSMC6 PE=3 SV=1	43.046	29	10	22	10	403	45.8	7.78	64.58	10	0	1	9.57947e+07	8.69692e+07	9.43322e+07	9.98259e+07	7.62541e+07	1.38248e+08	7.778e+07	1.01465e+08
A0A452ECP5			Uncharacterized protein OS=Capra hircus OX=9925 PE=4 SV=1	42.982	16	9	17	9	555	62.7	7.64	51.85	9	0	1	5.28598e+07	5.41806e+07	5.89243e+07	5.59561e+07	6.27693e+07	6.28346e+07	6.23609e+07	6.64842e+07
A0A452EEL7	Transporter	LOC102171968	Transporter OS=Capra hircus OX=9925 GN=LOC102171968 PE=3 SV=1	42.949	12	8	39	8	682	76.7	6.25	129.47	8	0	1	9.77206e+07	9.70922e+07	9.75804e+07	8.58057e+07	9.73106e+07	1.01155e+08	9.89355e+07	9.3499e+07
A0A452E3X4	Solute carrier family 25 member 20	SLC25A20	Solute carrier family 25 member 20 OS=Capra hircus OX=9925 GN=SLC25A20 PE=3 SV=1	42.647	25	9	61	9	301	32.9	9.39	153.99	9	0	1	4.65889e+08	4.8998e+08	5.10786e+08	4.86084e+08	5.02212e+08	4.50154e+08	5.2475e+08	5.46958e+08
A0A452FPD7	Protein-serine/threonine phosphatase	PPM1A	Protein-serine/threonine phosphatase OS=Capra hircus OX=9925 GN=PPM1A PE=3 SV=1	42.53	27	9	26	5	382	42.5	5.25	90.67	9	4	1	4.89566e+07	5.16659e+07	4.79822e+07	4.60604e+07	5.05596e+07	5.1253e+07	4.8028e+07	4.84851e+07
A0A452F3E6	Ubiquitin like modifier activating enzyme 6	UBA6	Ubiquitin like modifier activating enzyme 6 OS=Capra hircus OX=9925 GN=UBA6 PE=3 SV=1	42.472	12	12	19	12	1057	118.9	5.71	50.68	12	0	1	5.44695e+07	5.68817e+07	5.74464e+07	4.84348e+07	5.66805e+07	5.60587e+07	6.05456e+07	6.02985e+07
A0A452FLX5	Lysozyme	LOC102188781	Lysozyme OS=Capra hircus OX=9925 GN=LOC102188781 PE=3 SV=1	42.435	27	3	81	3	148	16.8	8.05	211.44	3	0	1	1.83453e+09	1.76802e+09	1.63296e+09	1.51739e+09	1.48594e+09	1.48353e+09	1.68923e+09	1.58192e+09
A0A452G9E9	Alpha-galactosidase	NAGA	Alpha-galactosidase OS=Capra hircus OX=9925 GN=NAGA PE=3 SV=1	42.399	17	6	20	6	411	46.4	5.38	70.31	6	0	1	1.20846e+08	1.31194e+08	1.19113e+08	1.14171e+08	1.21875e+08	1.15589e+08	1.19966e+08	1.20208e+08
A0A452FKS5	Annexin	ANXA5	Annexin OS=Capra hircus OX=9925 GN=ANXA5 PE=3 SV=1	42.342	28	9	17	8	319	35.9	5.05	53.02	9	1	1	8.22956e+07	8.06149e+07	7.64176e+07	8.96006e+07	6.6386e+07	7.51782e+07	8.10484e+07	7.98301e+07
A0A452EPM2	Coilin	COIL	Coilin OS=Capra hircus OX=9925 GN=COIL PE=3 SV=1	42.252	16	9	20	9	571	63.1	9.14	48.83	9	0	1	8.61358e+07	8.0416e+07	8.55851e+07	7.12968e+07	9.04587e+07	8.15421e+07	9.54301e+07	7.96396e+07
A9LLG2	Growth hormone inducible transmembrane protein	GHITM	Growth hormone inducible transmembrane protein OS=Capra hircus OX=9925 GN=GHITM PE=2 SV=1	42.245	22	7	39	7	345	37	9.86	116.5	7	0	1	2.46869e+08	2.48753e+08	2.51429e+08	2.33105e+08	2.54021e+08	2.5358e+08	2.59689e+08	2.61729e+08
A0A452FHQ6	BTB/POZ domain-containing protein 16	BTBD16	BTB/POZ domain-containing protein 16 OS=Capra hircus OX=9925 GN=BTBD16 PE=4 SV=1	42.197	26	14	30	14	497	57.2	9.32	82.43	14	0	1	1.82448e+08	1.93975e+08	1.98693e+08	1.7514e+08	1.9745e+08	1.813e+08	2.00704e+08	2.08035e+08
A0A452G8M9	Dynein light chain Tctex-type 1	DYNLT1	Dynein light chain Tctex-type 1 OS=Capra hircus OX=9925 GN=DYNLT1 PE=3 SV=1	42.158	31	2	21	2	110	12.1	7.2	65.57	2	0	1	5.86549e+07	6.22756e+07	5.61299e+07	4.5913e+07	5.9019e+07	5.37286e+07	6.52633e+07	5.81763e+07
A0A452G1I6	Patatin like phospholipase domain containing 7	PNPLA7	Patatin like phospholipase domain containing 7 OS=Capra hircus OX=9925 GN=PNPLA7 PE=3 SV=1	42.11	11	11	14	11	1241	137.2	8.85	46.9	11	0	1	3.64376e+07	3.84118e+07	3.53875e+07	3.14246e+07	3.61493e+07	3.77718e+07	3.67482e+07	3.75126e+07
A0A452F0H4	Family with sequence similarity 166 member C	FAM166C	Family with sequence similarity 166 member C OS=Capra hircus OX=9925 GN=FAM166C PE=4 SV=1	42.056	43	9	37	9	201	23.3	10.18	109.05	9	0	1	1.97123e+08	2.14737e+08	2.17149e+08	2.00237e+08	2.03049e+08	1.88395e+08	2.16603e+08	2.27165e+08
A0A452EE29	Casein kinase 1 alpha 1	CSNK1A1	Casein kinase 1 alpha 1 OS=Capra hircus OX=9925 GN=CSNK1A1 PE=3 SV=1	42.014	26	9	30	9	325	37.5	9.48	89.1	9	0	1	2.61224e+08	2.5625e+08	2.65079e+08	2.5488e+08	2.65811e+08	2.57994e+08	2.79848e+08	2.72857e+08
A0A452DKZ4	Mitochondrial import inner membrane translocase subunit Tim21	TIMM21	Mitochondrial import inner membrane translocase subunit Tim21 OS=Capra hircus OX=9925 GN=TIMM21 PE=3 SV=1	42.012	31	8	26	8	244	28	9.55	76.98	8	0	1	1.16968e+08	1.15235e+08	1.20912e+08	1.2163e+08	1.24344e+08	1.19283e+08	1.22339e+08	1.23356e+08
A0A452FJ10	Chromosome 26 C10orf82 homolog	C10orf82	Chromosome 26 C10orf82 homolog OS=Capra hircus OX=9925 GN=C10orf82 PE=4 SV=1	41.945	31	7	48	7	235	26.9	8.5	118.99	7	0	1	2.52767e+08	2.98381e+08	3.01986e+08	2.60729e+08	2.94886e+08	2.86262e+08	3.07986e+08	3.31203e+08
A0A452ESP0	SPG7 matrix AAA peptidase subunit, paraplegin	SPG7	SPG7 matrix AAA peptidase subunit, paraplegin OS=Capra hircus OX=9925 GN=SPG7 PE=3 SV=1	41.921	17	15	28	15	785	86.8	9.17	71.64	15	0	1	1.29761e+08	1.27847e+08	1.3775e+08	1.14744e+08	1.27584e+08	1.23976e+08	1.42355e+08	1.38247e+08
A0A452FZ73	Creatine kinase	CKM	Creatine kinase OS=Capra hircus OX=9925 GN=CKM PE=3 SV=1	41.788	19	7	17	6	381	43	7.15	45.07	7	1	1	6.99701e+07	1.78543e+07	2.14992e+07	2.04325e+07	1.77743e+07	2.03335e+07	1.57807e+07	1.67178e+07
A0A452EUU7	Serpin family E member 2	SERPINE2	Serpin family E member 2 OS=Capra hircus OX=9925 GN=SERPINE2 PE=3 SV=1	41.668	23	10	23	10	397	43.8	9.6	59.39	10	0	1	9.17466e+07	9.29137e+07	9.10625e+07	8.40795e+07	9.82707e+07	9.38305e+07	8.9402e+07	9.32126e+07
A0A452FKU2	Citrate lyase beta like	CLYBL	Citrate lyase beta like OS=Capra hircus OX=9925 GN=CLYBL PE=4 SV=1	41.629	35	10	26	10	329	36.5	6.57	88.74	10	0	1	7.73821e+07	9.35409e+07	8.44999e+07	8.00258e+07	8.43312e+07	7.98593e+07	8.48709e+07	8.81141e+07
A0A452DN44	Actin like 10	ACTL10	Actin like 10 OS=Capra hircus OX=9925 GN=ACTL10 PE=3 SV=1	41.6	29	9	34	9	383	41	8.28	102.16	9	0	1	9.9606e+07	1.05405e+08	1.07167e+08	9.4372e+07	1.04331e+08	1.04816e+08	1.08028e+08	1.08861e+08
A0A452EHL5	Casein kinase II subunit beta	CSNK2B	Casein kinase II subunit beta OS=Capra hircus OX=9925 GN=CSNK2B PE=3 SV=1	41.587	34	6	34	6	215	24.9	5.55	116.08	6	0	1	2.54808e+08	2.82888e+08	2.6839e+08	2.59613e+08	2.65266e+08	2.55479e+08	2.77369e+08	2.81662e+08
A0A452EJT9	Serine protease 54	PRSS54	Serine protease 54 OS=Capra hircus OX=9925 GN=PRSS54 PE=4 SV=1	41.397	20	7	46	7	327	36.9	8.73	146.55	7	0	1	3.74821e+08	3.72004e+08	3.65547e+08	3.24018e+08	3.83548e+08	3.59353e+08	3.72873e+08	3.65307e+08
A0A452FQ03	Ribosome binding protein 1	RRBP1	Ribosome binding protein 1 OS=Capra hircus OX=9925 GN=RRBP1 PE=4 SV=1	41.332	17	7	12	7	1518	163.2	9.2	35.66	7	0	1	1.68092e+07	1.72965e+07	1.57538e+07	1.95622e+07	1.55852e+07	1.76102e+07	1.50306e+07	1.51536e+07
A0A452EKD6	Ankyrin repeat and MYND domain containing 1	ANKMY1	Ankyrin repeat and MYND domain containing 1 OS=Capra hircus OX=9925 GN=ANKMY1 PE=4 SV=1	41.316	15	10	12	10	897	99.8	6.93	38.5	10	0	1	3.99323e+07	4.11648e+07	3.95759e+07	3.53553e+07	3.98317e+07	4.21561e+07	3.91797e+07	4.04365e+07
A0A452ERX1	Solute carrier family 25 member 1	SLC25A1	Solute carrier family 25 member 1 OS=Capra hircus OX=9925 GN=SLC25A1 PE=3 SV=1	41.31	26	9	29	9	311	33.8	9.79	66.55	9	0	1	1.7679e+08	1.90046e+08	1.91618e+08	1.65897e+08	1.89241e+08	1.79061e+08	2.00301e+08	2.0614e+08
A0A452F294	Serine/threonine-protein phosphatase 2A 56 kDa regulatory subunit	PPP2R5A	Serine/threonine-protein phosphatase 2A 56 kDa regulatory subunit OS=Capra hircus OX=9925 GN=PPP2R5A PE=3 SV=1	41.272	17	8	19	8	492	57.1	7.08	60.18	8	0	1	6.36584e+07	6.77135e+07	6.83102e+07	6.38296e+07	6.99638e+07	6.72131e+07	6.89133e+07	7.28108e+07
A0A452DQF0	Solute carrier family 25 member 19	SLC25A19	Solute carrier family 25 member 19 OS=Capra hircus OX=9925 GN=SLC25A19 PE=3 SV=1	41.252	33	11	21	11	318	35.1	9.2	51.89	11	0	1	7.78211e+07	8.00847e+07	8.10261e+07	8.5986e+07	7.77637e+07	7.83452e+07	8.03889e+07	8.48779e+07
A0A452DMM6	Disintegrin and metalloproteinase domain-containing protein 32	ADAM32	Disintegrin and metalloproteinase domain-containing protein 32 OS=Capra hircus OX=9925 GN=ADAM32 PE=4 SV=1	41.17	10	7	19	7	749	83.3	5.34	60.65	7	0	1	7.14944e+07	6.3389e+07	6.05127e+07	8.17928e+07	5.62203e+07	6.63413e+07	6.25859e+07	6.40758e+07
A0A452E3A6	Axonemal dynein light chain domain containing 1	AXDND1	Axonemal dynein light chain domain containing 1 OS=Capra hircus OX=9925 GN=AXDND1 PE=4 SV=1	41.153	9	8	23	8	889	103.2	6.23	59.13	8	0	1	7.07881e+07	6.65829e+07	7.1229e+07	6.24577e+07	6.8544e+07	7.23161e+07	6.9825e+07	7.14028e+07
A0A452FS74	Nucleoporin NUP53	NUP35	Nucleoporin NUP53 OS=Capra hircus OX=9925 GN=NUP35 PE=3 SV=1	41.151	29	7	16	7	310	33.2	9.36	56.16	7	0	1	5.80571e+07	5.80865e+07	5.72668e+07	4.88905e+07	5.81113e+07	5.42285e+07	5.59872e+07	5.69956e+07
A0A452F4X8	NADH dehydrogenase [ubiquinone] 1 alpha subcomplex subunit 12	NDUFA12	NADH dehydrogenase [ubiquinone] 1 alpha subcomplex subunit 12 OS=Capra hircus OX=9925 GN=NDUFA12 PE=3 SV=1	41.072	71	8	30	8	145	17.1	9.7	91.67	8	0	1	1.5589e+08	1.686e+08	1.6862e+08	1.90704e+08	1.69724e+08	1.50287e+08	1.67698e+08	1.70243e+08
A0A452F3M1	Importin 5	IPO5	Importin 5 OS=Capra hircus OX=9925 GN=IPO5 PE=4 SV=1	41.003	11	9	17	9	1097	123.5	4.94	65.95	9	0	1	4.21984e+07	3.86443e+07	4.15064e+07	3.11834e+07	4.21618e+07	4.78078e+07	4.26941e+07	3.82527e+07
A0A452FMD8	Spermatogenesis associated 6	SPATA6	Spermatogenesis associated 6 OS=Capra hircus OX=9925 GN=SPATA6 PE=3 SV=1	40.883	26	12	24	12	488	56.1	8.69	63.9	12	0	1	7.2203e+07	7.25549e+07	7.79994e+07	6.66343e+07	7.16952e+07	7.82627e+07	8.0083e+07	7.86089e+07
A0A452F7T9	PGAM family member 5, mitochondrial serine/threonine protein phosphatase	PGAM5	PGAM family member 5, mitochondrial serine/threonine protein phosphatase OS=Capra hircus OX=9925 GN=PGAM5 PE=4 SV=1	40.878	24	7	38	7	289	31.9	8.56	119.93	7	0	1	9.33054e+07	9.77796e+07	1.0277e+08	9.90225e+07	1.07895e+08	9.93421e+07	1.00303e+08	1.08351e+08
A0A452EZ82	NAD-dependent protein deacylase sirtuin-5, mitochondrial	SIRT5	NAD-dependent protein deacylase sirtuin-5, mitochondrial OS=Capra hircus OX=9925 GN=SIRT5 PE=3 SV=1	40.78	22	5	24	5	310	34	8.1	81.65	5	0	1	5.48751e+07	6.16859e+07	5.36144e+07	5.27424e+07	5.17483e+07	5.61253e+07	5.44654e+07	5.62689e+07
A0A452F8Y0	Actin-related protein T1	ACTRT1	Actin-related protein T1 OS=Capra hircus OX=9925 GN=ACTRT1 PE=3 SV=1	40.734	32	11	74	11	377	42.1	5.83	189.22	11	0	1	9.78556e+08	7.92658e+08	9.0622e+08	7.30026e+08	9.77727e+08	9.30641e+08	1.02442e+09	8.3145e+08
A0A452EPP9	Tripartite motif containing 42	TRIM42	Tripartite motif containing 42 OS=Capra hircus OX=9925 GN=TRIM42 PE=4 SV=1	40.685	13	7	14	7	725	83	8.09	49.94	7	0	1	4.5097e+07	3.3293e+07	3.48469e+07	2.84685e+07	4.22228e+07	3.74932e+07	4.64321e+07	3.03407e+07
A0A452EMN0	Short chain dehydrogenase/reductase family 39U member 1	SDR39U1	Short chain dehydrogenase/reductase family 39U member 1 OS=Capra hircus OX=9925 GN=SDR39U1 PE=4 SV=1	40.619	28	7	20	7	294	31.3	9.33	59.24	7	0	1	9.94436e+07	9.94609e+07	1.03787e+08	9.43189e+07	1.02894e+08	1.03e+08	1.08063e+08	1.17017e+08
A0A452FYQ9	60S ribosomal protein L40	UBA52	60S ribosomal protein L40 OS=Capra hircus OX=9925 GN=UBA52 PE=3 SV=1	40.59	37	5	115	5	128	14.7	9.83	304.38	5	0	1	6.46276e+08	6.25104e+08	6.76434e+08	5.69731e+08	5.46968e+08	5.48818e+08	6.61303e+08	6.33937e+08
A0A452DKK9	Peptidase S1 domain-containing protein		Peptidase S1 domain-containing protein OS=Capra hircus OX=9925 PE=4 SV=1	40.561	13	4	43	4	300	32.6	8.94	114.93	4	0	1	3.05483e+08	3.12651e+08	3.26867e+08	2.58228e+08	3.04458e+08	3.30812e+08	3.44625e+08	3.43139e+08
A0A452DRD6	Complex I-B16.6	NDUFA13	Complex I-B16.6 OS=Capra hircus OX=9925 GN=NDUFA13 PE=3 SV=1	40.412	34	6	25	6	144	16.7	9.26	80.5	6	0	1	1.27313e+08	1.33561e+08	1.34198e+08	1.57515e+08	1.42023e+08	1.16714e+08	1.36635e+08	1.42332e+08
A0A452DZT8	Heat shock 70 kDa protein 4	HSPA4	Heat shock 70 kDa protein 4 OS=Capra hircus OX=9925 GN=HSPA4 PE=3 SV=1	40.382	16	13	21	8	840	94.4	5.21	57.69	13	5	1	7.48219e+07	8.1303e+07	7.98364e+07	7.71206e+07	8.04321e+07	8.07363e+07	8.5421e+07	8.64067e+07
A0A452FN17	Theg spermatid protein	THEG	Theg spermatid protein OS=Capra hircus OX=9925 GN=THEG PE=4 SV=1	40.321	25	11	37	11	369	42.5	9	103.31	11	0	1	2.67641e+08	2.70744e+08	2.70312e+08	2.35257e+08	2.73221e+08	2.68747e+08	2.57989e+08	2.79039e+08
A0A452FXM5	Voltage-dependent anion-selective channel protein 1	VDAC1	Voltage-dependent anion-selective channel protein 1 OS=Capra hircus OX=9925 GN=VDAC1 PE=3 SV=1	40.321	34	8	39	6	283	30.7	8.54	99.06	8	0	1	4.42738e+07	4.15364e+07	4.37433e+07	4.02502e+07	4.0004e+07	3.91832e+07	3.88569e+07	3.91465e+07
A0A452EAV8	Nucleoporin 62	NUP62	Nucleoporin 62 OS=Capra hircus OX=9925 GN=NUP62 PE=3 SV=1	40.281	15	8	20	8	523	52.6	5.41	64.39	8	0	1	9.37584e+07	1.02759e+08	9.6258e+07	8.20158e+07	9.48853e+07	9.38461e+07	9.75128e+07	9.42256e+07
A0A452E1U3	CMT1A duplicated region transcript 1	CDRT1	CMT1A duplicated region transcript 1 OS=Capra hircus OX=9925 GN=CDRT1 PE=4 SV=1	40.274	13	13	29	13	1080	122.8	9.57	74.29	13	0	1	4.75826e+07	5.21925e+07	4.9715e+07	4.58989e+07	5.05062e+07	5.17103e+07	4.86318e+07	5.10403e+07
A0A452FCM2	Calmin	CLMN	Calmin OS=Capra hircus OX=9925 GN=CLMN PE=4 SV=1	40.209	10	11	23	11	1039	116.3	4.89	62.27	11	0	1	5.42769e+07	6.70506e+07	5.83071e+07	5.9568e+07	5.93288e+07	5.77347e+07	6.19502e+07	6.35156e+07
A0A452FKW3	IZUMO family member 2	IZUMO2	IZUMO family member 2 OS=Capra hircus OX=9925 GN=IZUMO2 PE=3 SV=1	40.177	31	7	32	7	221	25.2	8.68	88.81	7	0	1	1.24214e+08	1.23286e+08	1.33826e+08	1.25511e+08	1.19411e+08	1.2532e+08	1.30444e+08	1.40733e+08
A0A452EWQ2	SPEM family member 2	SPEM2	SPEM family member 2 OS=Capra hircus OX=9925 GN=SPEM2 PE=4 SV=1	39.918	20	8	19	8	495	56.2	10.23	44.53	8	0	1	3.16473e+07	2.39434e+07	2.493e+07	2.4897e+07	3.01744e+07	2.81966e+07	3.26657e+07	2.38525e+07
A0A452FT17	NADH dehydrogenase [ubiquinone] 1 alpha subcomplex subunit 8	NDUFA8	NADH dehydrogenase [ubiquinone] 1 alpha subcomplex subunit 8 OS=Capra hircus OX=9925 GN=NDUFA8 PE=3 SV=1	39.916	42	7	20	7	172	20.1	7.91	73.31	7	0	1	1.83291e+08	1.92995e+08	2.11122e+08	2.48821e+08	2.07562e+08	1.87191e+08	2.02529e+08	2.24911e+08
A0A452GBB7	Aldehyde dehydrogenase	ALDH3A2	Aldehyde dehydrogenase OS=Capra hircus OX=9925 GN=ALDH3A2 PE=3 SV=1	39.832	20	8	16	8	500	55.7	7.69	54.52	8	0	1	5.57589e+07	6.63574e+07	5.38258e+07	5.19524e+07	5.4847e+07	5.31928e+07	5.61213e+07	5.71793e+07
A0A452G8R8	Endophilin-B1	SH3GLB1	Endophilin-B1 OS=Capra hircus OX=9925 GN=SH3GLB1 PE=4 SV=1	39.753	23	9	29	1	402	45.1	6.35	82.93	9	8	1	1.06643e+08	1.08804e+08	1.02388e+08	8.98449e+07	1.00242e+08	1.08723e+08	1.09627e+08	1.00757e+08
A0A452ETV6	Carboxypeptidase D	CPD	Carboxypeptidase D OS=Capra hircus OX=9925 GN=CPD PE=3 SV=1	39.727	9	11	20	11	1378	152.7	6.1	50.9	11	0	1	6.1916e+07	6.50952e+07	6.05802e+07	5.17344e+07	6.18027e+07	6.10419e+07	6.05219e+07	5.89603e+07
A0A452G8L4	Endophilin-B1	SH3GLB1	Endophilin-B1 OS=Capra hircus OX=9925 GN=SH3GLB1 PE=4 SV=1	39.432	26	9	28	1	365	40.8	6.2	79.83	9	0	1	3.10696e+06	3.00874e+06	2.74258e+06	2.74691e+06	3.15177e+06	3.03668e+06	3.55884e+06	2.96525e+06
A0A452FZ14	Outer dense fiber protein 1	ODF1	Outer dense fiber protein 1 OS=Capra hircus OX=9925 GN=ODF1 PE=4 SV=1	39.41	25	9	117	9	259	29.1	7.99	326.48	9	0	1	4.50384e+09	3.57055e+09	3.33038e+09	2.41863e+09	3.69847e+09	8.76089e+09	4.06546e+09	3.97692e+09
A0A452EBN6	RNA helicase	EIF4A2	RNA helicase OS=Capra hircus OX=9925 GN=EIF4A2 PE=3 SV=1	39.401	30	12	18	4	407	46.4	5.48	43.06	12	0	1	1.57761e+07	1.4935e+07	1.48993e+07	1.24515e+07	1.63757e+07	1.5751e+07	1.68869e+07	1.49656e+07
A0A452FDC1	NADH dehydrogenase [ubiquinone] iron-sulfur protein 6, mitochondrial	NDUFS6	NADH dehydrogenase [ubiquinone] iron-sulfur protein 6, mitochondrial OS=Capra hircus OX=9925 GN=NDUFS6 PE=3 SV=1	39.315	32	5	33	5	124	13.4	8.81	118.39	5	0	1	2.31535e+08	2.45889e+08	2.418e+08	2.19632e+08	2.25236e+08	2.31833e+08	2.32066e+08	2.3274e+08
A0A452E8X3	Rho GDP dissociation inhibitor beta	ARHGDIB	Rho GDP dissociation inhibitor beta OS=Capra hircus OX=9925 GN=ARHGDIB PE=3 SV=1	39.253	34	5	16	5	200	22.8	5.2	57.57	5	0	1	6.23446e+07	7.88546e+07	6.12313e+07	6.35711e+07	6.61329e+07	5.69394e+07	6.37913e+07	6.27585e+07
A0A452FUA1	Nucleoside diphosphate kinase	NME4	Nucleoside diphosphate kinase OS=Capra hircus OX=9925 GN=NME4 PE=3 SV=1	39.245	40	8	45	8	187	20.5	9.72	125.83	8	0	1	3.95173e+08	4.03686e+08	4.12168e+08	3.82876e+08	4.20765e+08	3.85563e+08	4.25527e+08	4.20049e+08
A0A452DQN1	Uncharacterized LOC102188368	LOC102188368	Uncharacterized LOC102188368 OS=Capra hircus OX=9925 GN=LOC102188368 PE=4 SV=1	39.237	29	7	34	7	275	29.9	9.8	90.42	7	0	1	1.13818e+08	1.18509e+08	1.16686e+08	1.0627e+08	1.12634e+08	1.18755e+08	1.19483e+08	1.20942e+08
A0A452DWR2	Beta-hexosaminidase	LOC102181993	Beta-hexosaminidase OS=Capra hircus OX=9925 GN=LOC102181993 PE=3 SV=1	39.224	16	9	28	5	556	63.1	9.26	82.87	9	3	1	6.56179e+07	7.78317e+07	6.26062e+07	5.85509e+07	7.56408e+07	7.3834e+07	5.98389e+07	5.77059e+07
A9LM14	RAB11B	rab11b	RAB11B OS=Capra hircus OX=9925 GN=rab11b PE=2 SV=1	39.221	35	8	26	8	218	24.5	5.94	83	8	0	1	1.20287e+08	1.23291e+08	1.27163e+08	1.37676e+08	1.30304e+08	1.15209e+08	1.33767e+08	1.32728e+08
A0A452ECR7	ITPRIP like 1	ITPRIPL1	ITPRIP like 1 OS=Capra hircus OX=9925 GN=ITPRIPL1 PE=3 SV=1	39.119	15	8	25	8	547	62.5	6.52	77.33	8	0	1	4.34209e+07	4.36683e+07	4.2344e+07	3.79493e+07	4.30924e+07	4.58703e+07	4.36569e+07	4.18039e+07
A0A452FDX2	Proteasome 26S subunit, ATPase 5	PSMC5	Proteasome 26S subunit, ATPase 5 OS=Capra hircus OX=9925 GN=PSMC5 PE=3 SV=1	38.944	34	12	19	10	406	45.6	7.55	45.23	12	0	1	6.58327e+07	5.89739e+07	6.17994e+07	6.02453e+07	6.20173e+07	7.54776e+07	6.5541e+07	6.38461e+07
A0A452FY19	OCIA domain containing 1	OCIAD1	OCIA domain containing 1 OS=Capra hircus OX=9925 GN=OCIAD1 PE=4 SV=1	38.722	19	4	19	4	247	27.8	7.17	61.84	4	0	1	1.45523e+08	1.52968e+08	1.40742e+08	1.20998e+08	1.34136e+08	1.20899e+08	1.43388e+08	1.3421e+08
A0A452FZ56	Theg spermatid protein like	THEGL	Theg spermatid protein like OS=Capra hircus OX=9925 GN=THEGL PE=4 SV=1	38.708	25	12	35	12	457	52.1	9.51	83.47	12	0	1	1.13746e+08	1.35694e+08	1.18897e+08	1.19834e+08	1.20661e+08	1.24105e+08	1.19147e+08	1.26772e+08
A1Z181	Bodhesin-2 (Fragment)	Bdh-2	Bodhesin-2 (Fragment) OS=Capra hircus OX=9925 GN=Bdh-2 PE=2 SV=1	38.66	50	5	37	5	105	11.7	7.05	103.01	5	0	1	2.53522e+08	2.31865e+08	2.77845e+08	2.07583e+08	2.8604e+08	2.29476e+08	2.50507e+08	2.58038e+08
A0A452DNT9	Centrosomal protein of 70 kDa	CEP70	Centrosomal protein of 70 kDa OS=Capra hircus OX=9925 GN=CEP70 PE=4 SV=1	38.56	16	10	18	10	588	68.6	6.37	40.94	10	0	1	5.94904e+07	5.69478e+07	5.67908e+07	4.20951e+07	5.82437e+07	5.66701e+07	5.64306e+07	5.07101e+07
A0A452G6W6	NSFL1 cofactor p47	NSFL1C	NSFL1 cofactor p47 OS=Capra hircus OX=9925 GN=NSFL1C PE=4 SV=1	38.544	32	9	17	9	372	40.9	5.25	57.86	9	0	1	2.15027e+07	2.25558e+07	2.22837e+07	2.08981e+07	2.22325e+07	2.11049e+07	2.265e+07	2.29894e+07
A0A452FMB4	Metabolism of cobalamin associated A	MMAA	Metabolism of cobalamin associated A OS=Capra hircus OX=9925 GN=MMAA PE=3 SV=1	38.52	17	7	21	7	421	46.9	9.66	55.26	7	0	1	7.12278e+07	7.50914e+07	7.03911e+07	6.67698e+07	7.06623e+07	7.21918e+07	7.10071e+07	7.14274e+07
A0A452F6T9	DnaJ heat shock protein family (Hsp40) member B8	DNAJB8	DnaJ heat shock protein family (Hsp40) member B8 OS=Capra hircus OX=9925 GN=DNAJB8 PE=4 SV=1	38.462	37	7	22	5	229	25	7.49	67.1	7	1	1	4.91893e+07	5.11572e+07	4.99664e+07	4.29163e+07	4.73449e+07	4.86073e+07	4.96439e+07	4.75427e+07
A0A452G6D2	6-phosphogluconate dehydrogenase, decarboxylating	PGD	6-phosphogluconate dehydrogenase, decarboxylating OS=Capra hircus OX=9925 GN=PGD PE=3 SV=1	38.357	14	6	15	6	473	51.9	7.5	54.92	6	0	1	2.43964e+07	2.52864e+07	2.49998e+07	2.55664e+07	2.63273e+07	2.63514e+07	2.64528e+07	2.69678e+07
A0A452FQF0			Uncharacterized protein OS=Capra hircus OX=9925 PE=4 SV=1	38.033	35	4	42	4	125	14.4	7.11	134.1	4	0	1	2.09536e+08	2.44763e+08	2.32355e+08	2.23076e+08	2.32902e+08	2.09876e+08	2.31656e+08	2.3868e+08
A0A452E811	Rab GDP dissociation inhibitor	GDI1	Rab GDP dissociation inhibitor OS=Capra hircus OX=9925 GN=GDI1 PE=3 SV=1	37.993	21	7	18	5	401	45.5	5.19	44.56	7	0	1	2.89911e+07	3.02861e+07	3.08238e+07	3.01002e+07	2.91518e+07	3.31475e+07	3.1279e+07	3.1773e+07
A0A452GAI0	Tetraspanin	TSPAN8	Tetraspanin OS=Capra hircus OX=9925 GN=TSPAN8 PE=3 SV=1	37.812	16	4	49	4	243	26.8	8.51	147.95	4	0	1	3.12198e+08	3.61647e+08	3.08843e+08	3.08702e+08	3.1441e+08	2.76488e+08	3.05734e+08	3.06235e+08
A0A452FM61	Protein-serine/threonine phosphatase	PPM1B	Protein-serine/threonine phosphatase OS=Capra hircus OX=9925 GN=PPM1B PE=3 SV=1	37.691	18	8	21	7	484	53.4	5.08	60.08	8	0	1	3.48205e+07	3.75303e+07	3.47752e+07	3.17936e+07	3.72819e+07	3.53914e+07	3.52566e+07	3.58392e+07
I1VE56	RAB8A, member RAS oncogene family	RAB8A	RAB8A, member RAS oncogene family OS=Capra hircus OX=9925 GN=RAB8A PE=2 SV=1	37.674	42	8	16	4	207	23.7	9.06	53.96	8	4	1	1.40392e+08	1.3962e+08	1.40961e+08	1.30696e+08	1.43978e+08	1.29741e+08	1.51936e+08	1.42468e+08
A0A452DYR3	Basal body-orientation factor 1	BBOF1	Basal body-orientation factor 1 OS=Capra hircus OX=9925 GN=BBOF1 PE=3 SV=1	37.657	16	10	19	10	538	63.3	9.23	52.89	10	0	1	5.71335e+07	6.0853e+07	6.11585e+07	6.07122e+07	6.03339e+07	6.0937e+07	6.06588e+07	6.09104e+07
A0A452EVJ6	LanC like 2	LANCL2	LanC like 2 OS=Capra hircus OX=9925 GN=LANCL2 PE=3 SV=1	37.605	21	8	12	8	452	51.2	7.58	42.67	8	0	1	3.75535e+07	3.66257e+07	3.70874e+07	3.30029e+07	3.75147e+07	3.73826e+07	4.10766e+07	3.66434e+07
A0A452FRV6	Coiled-coil domain containing 90B	CCDC90B	Coiled-coil domain containing 90B OS=Capra hircus OX=9925 GN=CCDC90B PE=3 SV=1	37.48	44	11	28	11	248	28.6	7.43	81.38	11	0	1	5.56565e+07	5.59946e+07	5.58834e+07	5.57638e+07	5.47769e+07	5.24591e+07	5.06508e+07	5.21141e+07
A0A452DT26	26S proteasome non-ATPase regulatory subunit 13	PSMD13	26S proteasome non-ATPase regulatory subunit 13 OS=Capra hircus OX=9925 GN=PSMD13 PE=3 SV=1	37.452	24	9	22	9	376	42.7	5.58	71.33	9	0	1	8.52318e+07	9.65435e+07	9.52471e+07	9.54954e+07	9.22787e+07	8.82325e+07	9.91605e+07	9.95381e+07
A0A452DR39	Carbonyl reductase [NADPH] 1	LOC108633281	Carbonyl reductase [NADPH] 1 OS=Capra hircus OX=9925 GN=LOC108633281 PE=3 SV=1	37.422	26	6	13	6	277	30.4	8.07	48.56	6	0	1	1.02858e+07	1.09019e+07	1.08755e+07	1.08948e+07	1.10017e+07	1.1025e+07	1.12043e+07	1.10161e+07
A0A452EPL0	Calmegin	CLGN	Calmegin OS=Capra hircus OX=9925 GN=CLGN PE=3 SV=1	37.385	18	12	27	12	606	69.3	4.75	70.05	12	0	1	1.01599e+08	1.03349e+08	8.61918e+07	7.7249e+07	1.06786e+08	1.06389e+08	8.35016e+07	8.32925e+07
A0A452G3E3	SMG8 nonsense mediated mRNA decay factor	GDPD1	SMG8 nonsense mediated mRNA decay factor OS=Capra hircus OX=9925 GN=GDPD1 PE=3 SV=1	37.365	28	8	11	8	314	36.1	8.06	28.24	8	0	1	5.76537e+07	5.13693e+07	6.10672e+07	5.07959e+07	5.67464e+07	5.6562e+07	6.23194e+07	6.2257e+07
A0A452ELA0	NAD(P)H-hydrate epimerase	NAXE	NAD(P)H-hydrate epimerase OS=Capra hircus OX=9925 GN=NAXE PE=3 SV=1	37.352	16	4	20	4	288	31.4	7.15	56.23	4	0	1	5.03162e+07	5.23844e+07	5.37941e+07	4.67985e+07	5.21409e+07	5.03595e+07	5.27236e+07	5.29514e+07
A0A452DXT0	Equatorin	EQTN	Equatorin OS=Capra hircus OX=9925 GN=EQTN PE=4 SV=1	37.349	8	3	57	3	320	36.2	4.87	179.64	3	0	1	3.90173e+08	4.12604e+08	3.62561e+08	3.04884e+08	3.73639e+08	3.37841e+08	3.60909e+08	3.32282e+08
A0A452EXH1	Glutathione reductase	GSR	Glutathione reductase OS=Capra hircus OX=9925 GN=GSR PE=3 SV=1	37.338	14	8	23	8	519	56.3	8.37	63.9	8	0	1	8.68983e+07	8.91209e+07	9.59641e+07	8.09784e+07	9.10678e+07	9.23365e+07	9.7382e+07	9.92388e+07
A0A452EWE7	Cytochrome c oxidase polypeptide Vb	COX5B	Cytochrome c oxidase polypeptide Vb OS=Capra hircus OX=9925 GN=COX5B PE=3 SV=1	37.316	24	5	142	5	143	15.4	8.28	420.73	5	0	1	7.77232e+08	8.42901e+08	8.58864e+08	8.19794e+08	8.08422e+08	6.83137e+08	7.92648e+08	8.24057e+08
A0A452DYL4	Coiled-coil domain containing 38	CCDC38	Coiled-coil domain containing 38 OS=Capra hircus OX=9925 GN=CCDC38 PE=4 SV=1	37.23	18	10	17	10	556	65.1	8.82	44.97	10	0	1	5.50268e+07	5.78152e+07	5.71975e+07	5.11474e+07	5.68507e+07	5.37884e+07	5.58937e+07	5.62545e+07
A0A452EAP2	WD_REPEATS_REGION domain-containing protein		WD_REPEATS_REGION domain-containing protein OS=Capra hircus OX=9925 PE=4 SV=1	37.174	17	8	23	8	465	53.1	5.08	72.3	8	0	1	7.98344e+07	8.59665e+07	8.20539e+07	7.37494e+07	7.90701e+07	8.18245e+07	7.95011e+07	8.13176e+07
A0A452FVZ1	Serine protease 50	PRSS50	Serine protease 50 OS=Capra hircus OX=9925 GN=PRSS50 PE=4 SV=1	37.118	24	7	33	7	327	37.3	9.03	101.36	7	0	1	2.85657e+08	3.18953e+08	2.97871e+08	2.67748e+08	2.93635e+08	2.75374e+08	3.07976e+08	3.05609e+08
A0A452EWG8	Insulin degrading enzyme	IDE	Insulin degrading enzyme OS=Capra hircus OX=9925 GN=IDE PE=3 SV=1	36.942	11	10	14	10	1019	117.9	6.61	36.38	10	0	1	2.68327e+07	2.55268e+07	2.54209e+07	2.89657e+07	2.61594e+07	2.81577e+07	2.45322e+07	2.48517e+07
A0A452DW17	Serine/threonine-protein phosphatase	PPP2CB	Serine/threonine-protein phosphatase OS=Capra hircus OX=9925 GN=PPP2CB PE=3 SV=1	36.937	21	6	13	1	309	35.5	5.43	51.42	6	5	1	2.69368e+07	3.03609e+07	2.79268e+07	2.65763e+07	2.71637e+07	2.79714e+07	2.87509e+07	2.84315e+07
A0A452FC56	Cysteine-S-conjugate beta-lyase 2	KYAT3	Cysteine-S-conjugate beta-lyase 2 OS=Capra hircus OX=9925 GN=KYAT3 PE=4 SV=1	36.792	23	8	13	8	476	53.7	7.84	32.68	8	0	1	7.07327e+07	6.05503e+07	6.54146e+07	4.93461e+07	6.45897e+07	7.70039e+07	6.50552e+07	6.53584e+07
A0A452EY39	Leucine rich repeat containing 18	LRRC18	Leucine rich repeat containing 18 OS=Capra hircus OX=9925 GN=LRRC18 PE=4 SV=1	36.778	37	10	19	10	261	29.3	9.6	61.65	10	0	1	8.27485e+07	8.7491e+07	9.16728e+07	9.01471e+07	9.26384e+07	8.39546e+07	8.70385e+07	9.6917e+07
A0A452EHX9	Cytochrome b-c1 complex subunit 7	LOC102183616	Cytochrome b-c1 complex subunit 7 OS=Capra hircus OX=9925 GN=LOC102183616 PE=3 SV=1	36.663	43	6	41	6	111	13.5	9.31	128.62	6	0	1	1.32362e+08	1.5849e+08	1.55759e+08	1.95675e+08	1.63472e+08	1.30182e+08	1.47868e+08	1.7422e+08
A0A452EDB8	Mitochondrial carrier 2	MTCH2	Mitochondrial carrier 2 OS=Capra hircus OX=9925 GN=MTCH2 PE=3 SV=1	36.659	27	8	70	1	294	32.1	8.34	185.38	8	0	1	4.55334e+06	4.44146e+06	4.48912e+06	5.51833e+06	4.60608e+06	4.96883e+06	4.81545e+06	4.24352e+06
A0A452FC43	Protein phosphatase 2 scaffold subunit Abeta	PPP2R1B	Protein phosphatase 2 scaffold subunit Abeta OS=Capra hircus OX=9925 GN=PPP2R1B PE=4 SV=1	36.607	17	8	12	4	589	64.7	4.96	35.78	8	0	1	8.79521e+06	9.51321e+06	8.353e+06	7.90019e+06	9.04792e+06	9.15941e+06	8.73105e+06	9.01542e+06
A0A452ES99	Sphingomyelin phosphodiesterase 4	SMPD4	Sphingomyelin phosphodiesterase 4 OS=Capra hircus OX=9925 GN=SMPD4 PE=4 SV=1	36.573	12	10	20	9	863	96.8	8.84	52.39	10	0	1	5.03999e+07	5.15376e+07	4.90797e+07	5.52833e+07	4.95005e+07	5.04977e+07	4.66108e+07	4.78142e+07
A0A452E2R3	Adenylate cyclase 10	ADCY10	Adenylate cyclase 10 OS=Capra hircus OX=9925 GN=ADCY10 PE=4 SV=1	36.534	7	11	15	2	1647	189.7	6.55	49.17	11	9	1	4.79949e+07	5.12636e+07	4.74865e+07	4.521e+07	4.54829e+07	5.00039e+07	4.64392e+07	4.87601e+07
A0A452DVM2	RAB10, member RAS oncogene family	RAB10	RAB10, member RAS oncogene family OS=Capra hircus OX=9925 GN=RAB10 PE=4 SV=1	36.513	38	7	18	5	200	22.5	8.38	58.93	7	0	1	2.75454e+07	2.6454e+07	2.64475e+07	2.4908e+07	2.45847e+07	2.31524e+07	2.61889e+07	2.63431e+07
A0A452G6X5	Heme oxygenase (biliverdin-producing)	HMOX2	Heme oxygenase (biliverdin-producing) OS=Capra hircus OX=9925 GN=HMOX2 PE=3 SV=1	36.494	21	6	24	6	334	37.6	5.34	67.37	6	0	1	7.6231e+07	7.07736e+07	7.14323e+07	7.49447e+07	7.68377e+07	7.44309e+07	7.36412e+07	6.9537e+07
A0A452EA45	Mannose-6-phosphate isomerase	MPI	Mannose-6-phosphate isomerase OS=Capra hircus OX=9925 GN=MPI PE=3 SV=1	36.451	19	6	16	6	424	46.4	5.86	53.08	6	0	1	5.85163e+07	5.44276e+07	6.1138e+07	5.77755e+07	6.19251e+07	6.51662e+07	6.24051e+07	6.20795e+07
A0A452FUS0	Serine/threonine-protein phosphatase	PPP2CA	Serine/threonine-protein phosphatase OS=Capra hircus OX=9925 GN=PPP2CA PE=3 SV=1	36.325	21	6	12	1	309	35.6	5.54	48.12	6	0	1	2.67508e+06	3.14811e+06	2.50541e+06	2.25613e+06	2.76718e+06	2.7323e+06	2.68168e+06	2.49209e+06
A0A452FY59	Calcium-transporting ATPase	ATP2A1	Calcium-transporting ATPase OS=Capra hircus OX=9925 GN=ATP2A1 PE=3 SV=1	36.314	7	7	12	1	1008	111	5.47	38.73	7	0	1	359031	558508	215415	410834	267801	239514	207362	192662
A0A452FW91	IQ domain-containing protein F5	IQCF5	IQ domain-containing protein F5 OS=Capra hircus OX=9925 GN=IQCF5 PE=4 SV=1	36.289	33	7	67	7	182	21.7	10.36	194.07	7	0	1	6.53688e+08	6.55706e+08	7.77949e+08	7.20979e+08	8.72175e+08	6.96667e+08	7.66592e+08	9.24312e+08
A0A452DXS6	Epididymal sperm binding protein 1	ELSPBP1	Epididymal sperm binding protein 1 OS=Capra hircus OX=9925 GN=ELSPBP1 PE=4 SV=1	36.209	35	8	17	8	225	26.3	8.06	48.84	8	0	1	7.32404e+07	7.11951e+07	6.89588e+07	8.36672e+07	7.25799e+07	7.43767e+07	7.08707e+07	7.08108e+07
A0A452ED69	Tripeptidyl-peptidase 2	TPP2	Tripeptidyl-peptidase 2 OS=Capra hircus OX=9925 GN=TPP2 PE=4 SV=1	36.187	10	14	32	14	1249	138.2	6.24	83.37	14	0	1	1.23823e+08	1.28405e+08	1.42602e+08	1.28731e+08	1.28946e+08	1.35706e+08	1.53598e+08	1.58251e+08
A0A452E7V9	Dynein axonemal heavy chain 11	DNAH11	Dynein axonemal heavy chain 11 OS=Capra hircus OX=9925 GN=DNAH11 PE=3 SV=1	36.078	2	8	54	1	4508	519.2	6.29	146.86	8	0	1	1.07546e+07	1.19199e+07	1.21774e+07	1.01229e+07	1.16133e+07	1.21011e+07	1.19164e+07	1.35129e+07
A0A452DKW0	Peptidase S1 domain-containing protein		Peptidase S1 domain-containing protein OS=Capra hircus OX=9925 PE=4 SV=1	35.935	30	4	10	4	206	23.8	7.99	45.38	4	0	1	3.56757e+07	3.68664e+07	3.44744e+07	3.42325e+07	3.36952e+07	3.76041e+07	3.58666e+07	3.7158e+07
A0A452DXI1	Complex I-20kD	NDUFS7	Complex I-20kD OS=Capra hircus OX=9925 GN=NDUFS7 PE=3 SV=1	35.795	17	5	30	5	238	26	9.7	94.11	5	0	1	2.03806e+08	2.22578e+08	2.06993e+08	1.93707e+08	1.81363e+08	1.94125e+08	2.10008e+08	2.16741e+08
A0A452DWP7	Peptidyl-prolyl cis-trans isomerase		Peptidyl-prolyl cis-trans isomerase OS=Capra hircus OX=9925 PE=3 SV=1	35.781	43	8	27	7	163	17.9	7.84	67.47	8	1	1	1.25718e+08	1.25725e+08	1.17616e+08	1.21035e+08	1.17943e+08	1.35369e+08	1.17424e+08	1.20332e+08
A0A452EGD1	Testis expressed 26	TEX26	Testis expressed 26 OS=Capra hircus OX=9925 GN=TEX26 PE=4 SV=1	35.737	30	9	18	9	291	33.9	9.64	49.97	9	0	1	7.72936e+07	8.54256e+07	8.2909e+07	7.2672e+07	8.11578e+07	8.0115e+07	8.44936e+07	8.66215e+07
A0A452ENC4	Leucine rich repeats and guanylate kinase domain containing	LRGUK	Leucine rich repeats and guanylate kinase domain containing OS=Capra hircus OX=9925 GN=LRGUK PE=4 SV=1	35.694	12	11	25	11	805	91.6	6.01	67.93	11	0	1	1.10746e+08	1.19632e+08	1.14783e+08	1.0224e+08	1.14303e+08	1.15034e+08	1.16858e+08	1.19511e+08
A0A452EBB8	Family with sequence similarity 170 member B	FAM170B	Family with sequence similarity 170 member B OS=Capra hircus OX=9925 GN=FAM170B PE=4 SV=1	35.678	18	6	26	6	289	32.8	5.25	80.39	6	0	1	5.76583e+07	5.85905e+07	5.5051e+07	5.21504e+07	5.77431e+07	5.81773e+07	5.67289e+07	5.45742e+07
A0A452END9	Serine/threonine-protein phosphatase	PPP3CC	Serine/threonine-protein phosphatase OS=Capra hircus OX=9925 GN=PPP3CC PE=3 SV=1	35.495	18	9	23	9	522	59.2	6.64	57.17	9	0	1	6.48299e+07	6.28959e+07	6.57019e+07	5.86027e+07	7.01133e+07	6.50275e+07	6.87143e+07	6.55206e+07
A0A452EEA4	Testis specific serine kinase 6	TSSK6	Testis specific serine kinase 6 OS=Capra hircus OX=9925 GN=TSSK6 PE=3 SV=1	35.472	29	9	37	9	273	30.2	9.2	110.39	9	0	1	2.60767e+08	2.5805e+08	2.74875e+08	2.44089e+08	2.65856e+08	2.79493e+08	2.80879e+08	2.76525e+08
A0A452DUV6	Sperm mitochondria associated cysteine rich protein	SMCP	Sperm mitochondria associated cysteine rich protein OS=Capra hircus OX=9925 GN=SMCP PE=4 SV=1	35.455	69	6	28	6	103	11	8.16	79.65	6	0	1	1.00637e+08	7.65152e+07	8.43851e+07	1.19683e+08	9.38332e+07	1.00494e+08	8.24306e+07	7.86003e+07
A0A452DVA0	Zinc finger MYND-type containing 12	ZMYND12	Zinc finger MYND-type containing 12 OS=Capra hircus OX=9925 GN=ZMYND12 PE=4 SV=1	35.392	22	8	16	8	366	41.6	6.58	52.1	8	0	1	6.08804e+07	6.3555e+07	6.38194e+07	5.77924e+07	6.38582e+07	6.28903e+07	6.50271e+07	6.43069e+07
A0A452ELI2	Coiled-coil-helix-coiled-coil-helix domain containing 3	CHCHD3	Coiled-coil-helix-coiled-coil-helix domain containing 3 OS=Capra hircus OX=9925 GN=CHCHD3 PE=4 SV=1	35.344	30	8	36	8	227	26.2	8.34	120.4	8	0	1	1.61211e+08	1.67642e+08	1.59856e+08	1.57889e+08	1.53684e+08	1.38119e+08	1.53344e+08	1.51408e+08
A0A452E0R1			Uncharacterized protein OS=Capra hircus OX=9925 PE=4 SV=1	35.322	11	9	16	9	1079	122.9	7.61	50.59	9	0	1	3.90854e+07	4.03673e+07	3.90922e+07	3.29388e+07	4.09001e+07	4.09785e+07	4.08932e+07	3.77417e+07
A0A452ESL2	BRI3 binding protein	BRI3BP	BRI3 binding protein OS=Capra hircus OX=9925 GN=BRI3BP PE=4 SV=1	35.246	21	4	16	4	242	26.9	9.51	56.17	4	0	1	4.12303e+07	4.41939e+07	4.64857e+07	4.82529e+07	4.52215e+07	4.4432e+07	4.59433e+07	4.93243e+07
A0A452G635	Hsc70-interacting protein pseudogene	LOC102168498	Hsc70-interacting protein pseudogene OS=Capra hircus OX=9925 GN=LOC102168498 PE=4 SV=1	35.18	15	6	24	1	354	39.5	5.2	72.97	6	0	1	1.26448e+07	1.23968e+07	1.35946e+07	1.2316e+07	1.25497e+07	1.27801e+07	1.43393e+07	1.40588e+07
A0A452FJ15	Nucleoside diphosphate kinase	NME2	Nucleoside diphosphate kinase OS=Capra hircus OX=9925 GN=NME2 PE=3 SV=1	35.089	57	7	20	4	152	17.3	7.37	60.76	7	0	1	4.30435e+07	4.57328e+07	4.55212e+07	4.11362e+07	4.50049e+07	4.2737e+07	4.97257e+07	5.12211e+07
A0A452G511	Syntaxin 2	STX2	Syntaxin 2 OS=Capra hircus OX=9925 GN=STX2 PE=3 SV=1	35.073	24	6	15	6	287	33.2	5.92	52.23	6	0	1	3.93741e+07	3.78027e+07	3.99956e+07	3.94558e+07	3.93138e+07	4.05793e+07	3.85691e+07	4.00536e+07
A0A452ELH3	Coiled-coil domain containing 189	CCDC189	Coiled-coil domain containing 189 OS=Capra hircus OX=9925 GN=CCDC189 PE=4 SV=1	34.989	20	6	17	6	326	37.1	5.91	60.38	6	0	1	4.84029e+07	5.03318e+07	4.98673e+07	4.55776e+07	4.91803e+07	4.82745e+07	4.87889e+07	4.98536e+07
A0A452G0J3	Metalloproteinase inhibitor 2	TIMP2	Metalloproteinase inhibitor 2 OS=Capra hircus OX=9925 GN=TIMP2 PE=3 SV=1	34.881	19	7	15	7	220	24.3	7.47	39.33	7	0	1	6.32089e+07	6.00406e+07	6.50422e+07	4.92954e+07	6.53609e+07	6.5172e+07	5.68093e+07	5.80826e+07
B9VR86	Proteasome subunit alpha type	PSMA6	Proteasome subunit alpha type OS=Capra hircus OX=9925 GN=PSMA6 PE=2 SV=1	34.712	26	8	24	8	246	27.4	6.76	75.14	8	0	1	1.7872e+08	1.86296e+08	2.02737e+08	1.91228e+08	1.78085e+08	1.83537e+08	2.16751e+08	2.19717e+08
A0A452DXS5	ADP-ribosylation factor 6	ARF6	ADP-ribosylation factor 6 OS=Capra hircus OX=9925 GN=ARF6 PE=3 SV=1	34.651	33	4	19	4	175	20.1	8.95	65.09	4	0	1	7.04153e+07	8.08777e+07	7.44432e+07	7.34121e+07	7.56318e+07	7.12512e+07	7.638e+07	7.87432e+07
A0A452E2A6	Choline dehydrogenase	CHDH	Choline dehydrogenase OS=Capra hircus OX=9925 GN=CHDH PE=3 SV=1	34.585	18	11	33	11	594	65.5	8.79	76.87	11	0	1	1.38623e+08	1.50118e+08	1.44153e+08	1.30624e+08	1.39953e+08	1.39495e+08	1.43096e+08	1.45875e+08
A0A452DWV7	Glutathione peroxidase	LOC102168954	Glutathione peroxidase OS=Capra hircus OX=9925 GN=LOC102168954 PE=3 SV=1	34.581	30	6	25	6	219	25.1	7.37	85.32	6	0	1	8.4415e+07	8.52481e+07	7.77681e+07	6.98348e+07	8.91605e+07	8.87227e+07	7.99267e+07	7.74507e+07
A0A452DZZ5	Leucine rich repeat containing 57	LRRC57	Leucine rich repeat containing 57 OS=Capra hircus OX=9925 GN=LRRC57 PE=4 SV=1	34.483	33	8	16	8	239	26.8	8.72	53.2	8	0	1	3.34126e+07	3.52306e+07	3.70926e+07	3.3892e+07	3.61637e+07	3.41711e+07	3.83106e+07	3.85505e+07
A0A452FER9	Keratin 7	KRT7	Keratin 7 OS=Capra hircus OX=9925 GN=KRT7 PE=3 SV=1	34.325	20	9	14	8	466	51.6	6.02	46.07	9	1	1	2.21832e+07	2.22696e+07	2.17023e+07	1.70439e+07	2.3382e+07	2.47767e+07	2.46732e+07	2.08173e+07
A0A452EMB9	Solute carrier family 25 member 10	SLC25A10	Solute carrier family 25 member 10 OS=Capra hircus OX=9925 GN=SLC25A10 PE=3 SV=1	34.278	30	9	26	9	287	31.5	9.29	72.59	9	0	1	1.1037e+08	1.15091e+08	1.18013e+08	1.1352e+08	1.1881e+08	1.09093e+08	1.17393e+08	1.23506e+08
A0A452FZ12			Uncharacterized protein OS=Capra hircus OX=9925 PE=4 SV=1	34.191	12	8	16	8	789	87.8	6.44	51.61	8	0	1	5.31229e+07	4.92127e+07	4.29197e+07	5.82042e+07	5.78148e+07	5.25159e+07	4.83619e+07	4.5121e+07
A0A452G697	Thioredoxin	TXNDC8	Thioredoxin OS=Capra hircus OX=9925 GN=TXNDC8 PE=3 SV=1	34.143	30	3	46	3	105	12.2	9.1	133.73	3	0	1	1.53146e+08	1.66149e+08	1.63953e+08	1.6991e+08	1.79037e+08	1.59349e+08	1.65909e+08	1.7751e+08
A0A452GAC9	3-hydroxy-3-methylglutarate-CoA lyase	HMGCL	3-hydroxy-3-methylglutarate-CoA lyase OS=Capra hircus OX=9925 GN=HMGCL PE=3 SV=1	34.051	25	8	19	8	325	34.2	8.81	59.91	8	0	1	6.88296e+07	7.24481e+07	7.39212e+07	8.15759e+07	6.97608e+07	7.53028e+07	7.24747e+07	7.75304e+07
A0A452F0Y6	DnaJ heat shock protein family (Hsp40) member A3	DNAJA3	DnaJ heat shock protein family (Hsp40) member A3 OS=Capra hircus OX=9925 GN=DNAJA3 PE=3 SV=1	34.024	14	7	23	7	480	52.1	9.44	73.87	7	0	1	1.01948e+08	1.01168e+08	1.05823e+08	8.77119e+07	9.54241e+07	1.00039e+08	1.11766e+08	1.12123e+08
A0A452DNG0	Serine/threonine-protein phosphatase	PPP6C	Serine/threonine-protein phosphatase OS=Capra hircus OX=9925 GN=PPP6C PE=3 SV=1	33.971	24	7	32	7	305	35.1	5.69	93.77	7	0	1	1.46325e+08	1.40734e+08	1.5092e+08	1.3189e+08	1.53343e+08	1.4826e+08	1.56542e+08	1.52826e+08
A0A452FZK6	Acyl-CoA thioesterase 7	ACOT7	Acyl-CoA thioesterase 7 OS=Capra hircus OX=9925 GN=ACOT7 PE=4 SV=1	33.918	22	6	15	6	385	42.6	9.14	44.44	6	0	1	3.55096e+07	3.59312e+07	3.74056e+07	3.11577e+07	3.75858e+07	3.75195e+07	3.72122e+07	3.64953e+07
A0A452E8S2	Glycerophosphodiester phosphodiesterase domain-containing protein 4-like	LOC102183767	Glycerophosphodiester phosphodiesterase domain-containing protein 4-like OS=Capra hircus OX=9925 GN=LOC102183767 PE=3 SV=1	33.901	10	6	11	5	695	80.9	7.24	36.82	6	2	1	3.93477e+07	4.27017e+07	3.94573e+07	3.56718e+07	4.45077e+07	3.84261e+07	4.3359e+07	4.01627e+07
A0A452EIR1	Eukaryotic translation elongation factor 2	EEF2	Eukaryotic translation elongation factor 2 OS=Capra hircus OX=9925 GN=EEF2 PE=3 SV=1	33.861	12	11	17	11	858	95.3	6.83	47.05	11	0	1	6.22865e+07	6.05e+07	6.10178e+07	7.04856e+07	5.70311e+07	6.76183e+07	6.23413e+07	6.19639e+07
A0A452F993	Prolyl endopeptidase	PREP	Prolyl endopeptidase OS=Capra hircus OX=9925 GN=PREP PE=3 SV=1	33.83	17	11	14	11	713	81.2	6.2	45.07	11	0	1	3.3759e+07	3.56483e+07	3.52077e+07	3.17174e+07	3.48851e+07	3.73425e+07	3.70815e+07	3.64619e+07
A0A452E6Z8	STIP1 homology and U-box containing protein 1	STUB1	STIP1 homology and U-box containing protein 1 OS=Capra hircus OX=9925 GN=STUB1 PE=4 SV=1	33.661	23	7	12	7	303	34.9	5.87	34.29	7	0	1	3.19702e+07	3.29312e+07	3.19753e+07	2.92863e+07	3.34916e+07	3.2745e+07	3.29911e+07	3.28228e+07
A0A452ER34	RAB1B, member RAS oncogene family	RAB1B	RAB1B, member RAS oncogene family OS=Capra hircus OX=9925 GN=RAB1B PE=4 SV=1	33.583	27	6	14	2	201	22.2	5.73	49.47	6	0	1	5.96816e+06	7.27871e+06	5.89059e+06	5.70835e+06	5.76697e+06	5.30874e+06	5.29056e+06	5.14749e+06
A0A452EXQ7	Proteasome subunit beta	PSMB2	Proteasome subunit beta OS=Capra hircus OX=9925 GN=PSMB2 PE=3 SV=1	33.544	29	5	14	5	194	22	8.09	38.16	5	0	1	5.13387e+07	4.33251e+07	5.36149e+07	4.2565e+07	4.5995e+07	5.18731e+07	5.48799e+07	5.62966e+07
A0A452F1Q3	Nucleoside diphosphate kinase	NME1	Nucleoside diphosphate kinase OS=Capra hircus OX=9925 GN=NME1 PE=3 SV=1	33.532	53	7	19	4	152	17.2	7.44	59.77	7	4	1	1.14362e+08	1.13058e+08	1.23716e+08	1.23469e+08	1.14289e+08	1.07719e+08	1.26218e+08	1.2861e+08
A0A452EZ76	EF-hand calcium binding domain 1	EFCAB1	EF-hand calcium binding domain 1 OS=Capra hircus OX=9925 GN=EFCAB1 PE=4 SV=1	33.505	34	8	31	8	212	24.6	5.06	85.27	8	0	1	1.76953e+08	1.78997e+08	1.87365e+08	1.9076e+08	2.00586e+08	1.65388e+08	1.77877e+08	1.74146e+08
A0A452FNS6	Phosphatidylinositol 4-kinase type 2	PI4K2B	Phosphatidylinositol 4-kinase type 2 OS=Capra hircus OX=9925 GN=PI4K2B PE=3 SV=1	33.328	18	9	21	9	487	55.5	6.93	69.23	9	0	1	9.78297e+07	1.04217e+08	1.0307e+08	9.28994e+07	1.02373e+08	9.67153e+07	1.03707e+08	1.06102e+08
A0A452FQE6	Family with sequence similarity 228 member B	FAM228B	Family with sequence similarity 228 member B OS=Capra hircus OX=9925 GN=FAM228B PE=3 SV=1	33.294	26	8	24	8	264	31.6	9.29	82.21	8	0	1	5.49842e+07	5.74661e+07	5.48133e+07	5.36906e+07	5.42201e+07	5.50955e+07	5.37517e+07	5.64053e+07
A0A452FZK7	Cilia- and flagella-associated protein 126	CFAP126	Cilia- and flagella-associated protein 126 OS=Capra hircus OX=9925 GN=CFAP126 PE=3 SV=1	33.288	40	5	30	5	176	19.3	10.18	92.28	5	0	1	1.87486e+08	1.88005e+08	1.93757e+08	1.89298e+08	1.9154e+08	1.73357e+08	1.93085e+08	1.99174e+08
A0A452F818	1-acylglycerol-3-phosphate O-acyltransferase 3	AGPAT3	1-acylglycerol-3-phosphate O-acyltransferase 3 OS=Capra hircus OX=9925 GN=AGPAT3 PE=3 SV=1	33.199	18	8	19	8	376	43.3	8.9	56.64	8	0	1	5.23435e+07	5.35872e+07	5.44137e+07	5.01276e+07	5.41141e+07	5.26991e+07	5.51512e+07	5.36599e+07
A0A452E813	Proteasome subunit beta	PSMB5	Proteasome subunit beta OS=Capra hircus OX=9925 GN=PSMB5 PE=3 SV=1	32.988	25	7	19	7	263	28.7	7.02	61.28	7	0	1	5.63664e+07	5.67745e+07	5.98069e+07	5.37307e+07	5.81198e+07	6.00955e+07	6.20123e+07	6.20748e+07
A0A452DLM2	Spermadhesin-1	LOC102175091	Spermadhesin-1 OS=Capra hircus OX=9925 GN=LOC102175091 PE=3 SV=1	32.943	43	5	18	5	134	15	6.51	54.44	5	0	1	3.93268e+07	3.85139e+07	3.54999e+07	3.72852e+07	3.7194e+07	3.99575e+07	3.60695e+07	3.4275e+07
A0A452F9L1	RAB8B, member RAS oncogene family	RAB8B	RAB8B, member RAS oncogene family OS=Capra hircus OX=9925 GN=RAB8B PE=4 SV=1	32.865	29	5	13	1	207	23.7	9.07	40.45	5	0	1	3.89613e+06	4.10474e+06	4.10799e+06	4.2023e+06	4.3305e+06	4.18376e+06	4.24395e+06	4.47467e+06
A0A452DNJ5			Uncharacterized protein OS=Capra hircus OX=9925 PE=4 SV=1	32.841	15	8	15	8	586	66.9	6.07	44.17	8	0	1	7.37475e+07	7.35789e+07	8.34075e+07	7.6561e+07	8.34983e+07	8.06536e+07	9.87467e+07	9.99695e+07
A0A452E3K5	Histone H2A	LOC102171676	Histone H2A OS=Capra hircus OX=9925 GN=LOC102171676 PE=3 SV=1	32.804	33	4	28	1	129	14	10.9	61.63	4	0	1	1.06961e+06	1.32471e+06	1.18088e+06	2.05352e+06	1.45934e+06	1.18463e+06	1.24076e+06	1.51417e+06
A0A452ECF5	Protein phosphatase 1 regulatory subunit 7	PPP1R7	Protein phosphatase 1 regulatory subunit 7 OS=Capra hircus OX=9925 GN=PPP1R7 PE=4 SV=1	32.784	31	11	16	11	354	40.4	5.19	36.49	11	0	1	8.59448e+07	8.26399e+07	8.96452e+07	6.85689e+07	8.66772e+07	8.34132e+07	9.54095e+07	8.20647e+07
A0A452GAH3	Sodium/potassium-transporting ATPase subunit beta	ATP1B3	Sodium/potassium-transporting ATPase subunit beta OS=Capra hircus OX=9925 GN=ATP1B3 PE=3 SV=1	32.743	25	8	29	8	279	31.5	7.14	92.96	8	0	1	2.7902e+08	2.83979e+08	2.70882e+08	2.54655e+08	2.70027e+08	2.59339e+08	2.75968e+08	2.73859e+08
A0A452G2N4	FAD synthase	FLAD1	FAD synthase OS=Capra hircus OX=9925 GN=FLAD1 PE=3 SV=1	32.732	22	8	15	8	490	54.2	5.94	49.92	8	0	1	2.78067e+07	3.54537e+07	2.85803e+07	2.84277e+07	2.95844e+07	2.91528e+07	2.82238e+07	2.94653e+07
A0A452G4F2	Serine/threonine kinase 33	STK33	Serine/threonine kinase 33 OS=Capra hircus OX=9925 GN=STK33 PE=3 SV=1	32.693	15	8	17	8	473	53	7.14	41.41	8	0	1	5.43409e+07	5.4098e+07	5.32912e+07	4.70151e+07	4.80412e+07	5.41551e+07	5.47518e+07	5.5944e+07
A0A452EH65	Diacylglycerol kinase	DGKA	Diacylglycerol kinase OS=Capra hircus OX=9925 GN=DGKA PE=3 SV=1	32.656	10	6	10	6	734	82.5	6.39	34.47	6	0	1	2.65486e+07	2.70994e+07	2.64154e+07	2.45425e+07	2.62903e+07	2.76094e+07	2.63696e+07	2.61909e+07
A0A452FM43	Synaptojanin 2 binding protein	SYNJ2BP	Synaptojanin 2 binding protein OS=Capra hircus OX=9925 GN=SYNJ2BP PE=4 SV=1	32.641	30	5	24	5	145	15.8	5.5	77.81	5	0	1	1.01815e+08	1.07269e+08	1.00578e+08	1.00774e+08	8.94722e+07	9.46644e+07	9.70325e+07	9.80129e+07
A0A452FRX8	Acylglycerol kinase	AGK	Acylglycerol kinase OS=Capra hircus OX=9925 GN=AGK PE=4 SV=1	32.62	22	9	22	9	420	46.7	8.65	71.33	9	0	1	6.68384e+07	7.09407e+07	6.67743e+07	6.12058e+07	6.48738e+07	7.08662e+07	6.79393e+07	6.97388e+07
A0A452DZW1	Cysteine rich secretory protein 2	CRISP2	Cysteine rich secretory protein 2 OS=Capra hircus OX=9925 GN=CRISP2 PE=3 SV=1	32.584	23	5	15	1	244	27.2	6.98	41.84	5	5	1	4.25599e+07	4.37218e+07	3.99271e+07	4.23547e+07	4.39798e+07	4.11635e+07	4.04293e+07	4.00483e+07
A0A452ECX7	14-3-3 protein theta	YWHAQ	14-3-3 protein theta OS=Capra hircus OX=9925 GN=YWHAQ PE=3 SV=1	32.535	23	7	33	1	245	27.7	4.78	86.19	7	0	1	685454	722656	669982	700209	786035	1.12225e+06	964754	1.14179e+06
A0A452E096	Nucleoporin 58	NUP58	Nucleoporin 58 OS=Capra hircus OX=9925 GN=NUP58 PE=4 SV=1	32.491	14	9	22	9	586	59.2	9.35	60.61	9	0	1	5.59566e+07	5.89364e+07	5.84147e+07	5.27484e+07	5.95893e+07	5.81089e+07	5.95543e+07	5.93795e+07
A0A452ECL8	Long-chain specific acyl-CoA dehydrogenase, mitochondrial	ACADL	Long-chain specific acyl-CoA dehydrogenase, mitochondrial OS=Capra hircus OX=9925 GN=ACADL PE=3 SV=1	32.332	20	9	14	9	429	47.8	6.38	41.57	9	0	1	3.97014e+07	3.45211e+07	3.85827e+07	3.49435e+07	3.89308e+07	4.0542e+07	3.87528e+07	3.9983e+07
A0A452EMA0	Proteasome subunit alpha type	PSMA7	Proteasome subunit alpha type OS=Capra hircus OX=9925 GN=PSMA7 PE=3 SV=1	32.204	32	8	21	5	248	27.9	8.46	52.66	8	0	1	4.4111e+07	4.53869e+07	4.68349e+07	4.88538e+07	4.38113e+07	4.6954e+07	4.65675e+07	4.76654e+07
G1DG98	Calmodulin-like protein 3	CALML3	Calmodulin-like protein 3 OS=Capra hircus OX=9925 GN=CALML3 PE=2 SV=1	32.173	27	5	136	1	149	16.8	4.31	375.36	5	0	1	2.97867e+06	3.16063e+06	2.75196e+06	1.31859e+06	2.61424e+06	2.71366e+06	2.25838e+06	1.80624e+06
A0A452DPK3	Mitochondrial import inner membrane translocase subunit TIM50	TIMM50	Mitochondrial import inner membrane translocase subunit TIM50 OS=Capra hircus OX=9925 GN=TIMM50 PE=3 SV=1	32.053	25	9	14	9	355	40.1	8.37	43.32	9	0	1	3.17346e+07	3.36811e+07	3.27946e+07	3.74049e+07	3.28183e+07	3.16904e+07	3.33261e+07	3.50835e+07
D6PX61	Cysteine-rich secretory protein 2	Crisp2	Cysteine-rich secretory protein 2 OS=Capra hircus OX=9925 GN=Crisp2 PE=2 SV=1	31.993	23	5	14	1	244	27.2	6.98	39.53	5	0	1	1.27573e+07	1.10891e+07	1.02445e+07	8.79739e+06	1.14107e+07	1.065e+07	1.08115e+07	9.70501e+06
A0A452F3Q7	DUF4455 domain-containing protein		DUF4455 domain-containing protein OS=Capra hircus OX=9925 PE=4 SV=1	31.982	26	9	20	9	328	39	6.32	53.41	9	0	1	5.44936e+07	4.86297e+07	5.64178e+07	4.50203e+07	5.10327e+07	5.68853e+07	5.66052e+07	5.85235e+07
A0A452DP10	Proline rich 30	PRR30	Proline rich 30 OS=Capra hircus OX=9925 GN=PRR30 PE=4 SV=1	31.924	14	6	15	6	398	42.5	10.05	44.79	6	0	1	3.23436e+07	2.78611e+07	2.93359e+07	2.1814e+07	3.21888e+07	3.02548e+07	3.41819e+07	2.53909e+07
A0A452DTD9	Solute carrier family 30 member 9	SLC30A9	Solute carrier family 30 member 9 OS=Capra hircus OX=9925 GN=SLC30A9 PE=3 SV=1	31.904	15	8	17	8	566	63.1	8.32	49.01	8	0	1	5.83614e+07	5.95331e+07	5.91684e+07	5.0923e+07	6.15682e+07	6.534e+07	6.05491e+07	5.75217e+07
A0A452FRM7	Inactive ribonuclease-like protein 9		Inactive ribonuclease-like protein 9 OS=Capra hircus OX=9925 PE=3 SV=1	31.667	20	3	20	3	218	25.3	6.65	58.47	3	0	1	9.61668e+07	9.79269e+07	9.02229e+07	8.0746e+07	9.67558e+07	8.76395e+07	8.70718e+07	8.61548e+07
A0A452E0H5	NADH-cytochrome b5 reductase	LOC102173645	NADH-cytochrome b5 reductase OS=Capra hircus OX=9925 GN=LOC102173645 PE=3 SV=1	31.564	25	5	9	5	295	33.6	7.28	29	5	0	1	1.95629e+07	1.95201e+07	1.96548e+07	2.0144e+07	2.01436e+07	2.34783e+07	1.95892e+07	1.89329e+07
A0A452DPP7	Testis expressed 101	TEX101	Testis expressed 101 OS=Capra hircus OX=9925 GN=TEX101 PE=4 SV=1	31.475	19	4	9	4	253	27.2	7.4	34.33	4	0	1	8.61446e+07	9.47369e+07	9.44269e+07	9.3118e+07	8.01028e+07	9.38981e+07	1.16755e+08	1.20518e+08
A0A452EBR8	Glycerophosphodiester phosphodiesterase domain-containing protein 4-like	LOC102183296	Glycerophosphodiester phosphodiesterase domain-containing protein 4-like OS=Capra hircus OX=9925 GN=LOC102183296 PE=3 SV=1	31.251	8	5	12	4	741	86.2	7.91	37.29	5	0	1	1.10333e+07	1.05406e+07	1.04391e+07	8.90508e+06	1.06589e+07	1.06279e+07	1.04609e+07	1.0431e+07
A0A452E7C6	Acyl carrier protein	NDUFAB1	Acyl carrier protein OS=Capra hircus OX=9925 GN=NDUFAB1 PE=3 SV=1	31.22	21	4	13	4	156	17.3	5.07	40.02	4	0	1	5.38743e+07	6.86479e+07	5.17565e+07	6.99279e+07	6.16604e+07	4.52023e+07	5.10685e+07	5.0717e+07
A0A452DPE1	ADP ribosylation factor like GTPase 8A	ARL8A	ADP ribosylation factor like GTPase 8A OS=Capra hircus OX=9925 GN=ARL8A PE=3 SV=1	31.198	14	3	8	2	186	21.4	7.77	37.98	3	0	1	1.80589e+07	1.85665e+07	1.86347e+07	1.58044e+07	1.91661e+07	1.73562e+07	2.15514e+07	1.97323e+07
A0A452F659	15-oxoprostaglandin 13-reductase	PTGR2	15-oxoprostaglandin 13-reductase OS=Capra hircus OX=9925 GN=PTGR2 PE=3 SV=1	31.146	21	7	14	7	351	38.5	5.5	43.03	7	0	1	6.65837e+07	7.17024e+07	7.53824e+07	6.73871e+07	7.23586e+07	6.97735e+07	7.69892e+07	8.23998e+07
A0A452EWQ0	Transmembrane protein 209	TMEM209	Transmembrane protein 209 OS=Capra hircus OX=9925 GN=TMEM209 PE=4 SV=1	31.076	16	6	11	6	536	60.1	9.1	33.41	6	0	1	1.20547e+07	1.27481e+07	1.21818e+07	1.12588e+07	1.20537e+07	1.17914e+07	1.21957e+07	1.24225e+07
A0A452FSM5	Translocase of outer mitochondrial membrane 40	TOMM40	Translocase of outer mitochondrial membrane 40 OS=Capra hircus OX=9925 GN=TOMM40 PE=3 SV=1	30.898	12	4	16	4	361	37.7	7.25	59.88	4	0	1	7.21257e+07	7.46754e+07	7.34465e+07	6.15633e+07	6.843e+07	7.01109e+07	7.49859e+07	7.30693e+07
A0A452E2P2			Uncharacterized protein OS=Capra hircus OX=9925 PE=4 SV=1	30.894	11	6	26	1	474	53.1	7.58	69.96	6	0	1	877991	800134	829407	861311	840596	912835	880175	851468
A0A452E480	L-lactate dehydrogenase	LDHB	L-lactate dehydrogenase OS=Capra hircus OX=9925 GN=LDHB PE=3 SV=1	30.892	12	4	34	1	334	36.5	6.44	134.7	4	0	1	1.58764e+06	1.48189e+06	1.55266e+06	1.22005e+06	1.58204e+06	1.49446e+06	1.51791e+06	1.48801e+06
A0A452F6E7	N-myc downstream-regulated gene 3 protein	NDRG3	N-myc downstream-regulated gene 3 protein OS=Capra hircus OX=9925 GN=NDRG3 PE=3 SV=1	30.89	14	4	14	4	363	39.8	5.39	36.54	4	0	1	5.14956e+07	4.748e+07	4.76821e+07	4.40475e+07	4.56894e+07	5.4564e+07	4.95862e+07	4.89846e+07
A0A452FPX5	Proteasome activator subunit 4	PSME4	Proteasome activator subunit 4 OS=Capra hircus OX=9925 GN=PSME4 PE=3 SV=1	30.858	5	9	14	9	1802	206.4	6.84	44.57	9	0	1	3.54024e+07	3.8561e+07	3.84984e+07	3.68515e+07	3.83798e+07	4.04834e+07	4.25005e+07	4.88165e+07
A0A452G300	Proteasome 26S subunit, non-ATPase 12	PSMD12	Proteasome 26S subunit, non-ATPase 12 OS=Capra hircus OX=9925 GN=PSMD12 PE=3 SV=1	30.819	18	7	12	7	456	53	7.12	36.69	7	0	1	1.83818e+07	1.82644e+07	1.9752e+07	1.74961e+07	1.99799e+07	1.86512e+07	2.08172e+07	2.02816e+07
A0A452EHM9	B-cell receptor-associated protein	BCAP29	B-cell receptor-associated protein OS=Capra hircus OX=9925 GN=BCAP29 PE=3 SV=1	30.795	27	9	25	9	240	28.1	9.7	53.41	9	0	1	9.18728e+07	9.50891e+07	9.43099e+07	9.72406e+07	9.95225e+07	1.07287e+08	9.09296e+07	9.56351e+07
A0A452EI99	EF-hand calcium binding domain 2	EFCAB2	EF-hand calcium binding domain 2 OS=Capra hircus OX=9925 GN=EFCAB2 PE=4 SV=1	30.768	38	6	24	6	164	19	4.42	91.51	6	0	1	4.43457e+07	4.45217e+07	4.32353e+07	4.2513e+07	4.36826e+07	4.1825e+07	4.01344e+07	4.00454e+07
A0A452GB32	ATP synthase F1 subunit delta	ATP5F1D	ATP synthase F1 subunit delta OS=Capra hircus OX=9925 GN=ATP5F1D PE=3 SV=1	30.748	14	2	47	2	168	17.6	5.25	171.89	2	0	1	2.35328e+08	2.66416e+08	2.44527e+08	2.31832e+08	2.2609e+08	1.94563e+08	2.31351e+08	2.23012e+08
H2ETE9	C-type natriuretic peptide	NPPC	C-type natriuretic peptide OS=Capra hircus OX=9925 GN=NPPC PE=2 SV=2	30.635	39	5	25	5	126	13.3	10.13	75.91	5	0	1	7.42455e+07	7.10164e+07	8.2845e+07	8.48387e+07	8.37824e+07	8.91682e+07	7.37393e+07	8.1033e+07
A0A452E9T3			Uncharacterized protein OS=Capra hircus OX=9925 PE=4 SV=1	30.556	29	4	10	1	170	19.5	5.36	39.68	4	0	1	1.92434e+06	2.65412e+06	1.8973e+06	1.86494e+06	2.04485e+06	1.91524e+06	1.90722e+06	1.82955e+06
A0A059U2L1	Epididymal-specific lipocalin-5-like	LOC108637125	Epididymal-specific lipocalin-5-like OS=Capra hircus OX=9925 GN=LOC108637125 PE=2 SV=1	30.474	23	4	11	4	180	19.5	7.03	44.76	4	0	1	3.50535e+07	3.16776e+07	3.2987e+07	2.76916e+07	3.42101e+07	3.27867e+07	2.92932e+07	2.82888e+07
A0A452GBI5	Retinol dehydrogenase 14	LOC102185579	Retinol dehydrogenase 14 OS=Capra hircus OX=9925 GN=LOC102185579 PE=3 SV=1	30.425	26	7	15	7	336	36.6	8.31	33.39	7	0	1	4.00031e+07	3.97857e+07	3.98636e+07	3.84986e+07	4.1189e+07	4.1331e+07	3.95648e+07	4.15063e+07
A0A452FG41	Transmembrane and coiled-coil domains 2	TMCO2	Transmembrane and coiled-coil domains 2 OS=Capra hircus OX=9925 GN=TMCO2 PE=4 SV=1	30.381	17	5	29	5	182	20.3	5.26	77.67	5	0	1	1.80556e+08	1.70442e+08	1.86791e+08	1.58356e+08	1.66897e+08	1.61605e+08	1.93002e+08	1.87982e+08
A0A452F225	Complex I-PDSW	NDUFB10	Complex I-PDSW OS=Capra hircus OX=9925 GN=NDUFB10 PE=3 SV=1	30.356	38	5	12	5	176	20.9	8.69	43.89	5	0	1	2.75341e+07	2.88111e+07	2.96367e+07	4.07157e+07	3.79493e+07	3.54768e+07	3.08781e+07	3.12427e+07
A0A452DLN9	Serine protease 37	PRSS37	Serine protease 37 OS=Capra hircus OX=9925 GN=PRSS37 PE=4 SV=1	30.335	19	3	9	3	235	26.2	8.97	32.07	3	0	1	4.62899e+06	4.9411e+06	4.71828e+06	5.41623e+06	4.9051e+06	5.08575e+06	4.72145e+06	4.87122e+06
A0A452EP55	Aspartate transaminase	GOT1L1	Aspartate transaminase OS=Capra hircus OX=9925 GN=GOT1L1 PE=3 SV=1	30.331	17	6	8	6	404	45.6	6.52	29.15	6	0	1	4.3628e+07	4.75823e+07	4.58415e+07	4.38203e+07	4.73764e+07	4.25555e+07	4.58136e+07	4.70567e+07
A0A452F790	Coiled-coil domain containing 88B	CCDC88B	Coiled-coil domain containing 88B OS=Capra hircus OX=9925 GN=CCDC88B PE=4 SV=1	30.275	6	8	10	8	1455	162.7	5.15	30.44	8	0	1	2.15227e+07	2.22753e+07	2.17472e+07	1.94688e+07	2.17965e+07	2.23048e+07	2.19831e+07	2.18125e+07
A0A452F4B1	Dipeptidyl peptidase 7	DPP7	Dipeptidyl peptidase 7 OS=Capra hircus OX=9925 GN=DPP7 PE=3 SV=1	30.193	15	8	37	8	488	53.8	5.68	123.81	8	0	1	1.87259e+08	1.92598e+08	1.86958e+08	1.69996e+08	1.93497e+08	1.75135e+08	1.88819e+08	1.85211e+08
A0A452FJ88	Secretory carrier-associated membrane protein	SCAMP2	Secretory carrier-associated membrane protein OS=Capra hircus OX=9925 GN=SCAMP2 PE=3 SV=1	30.109	14	3	9	3	328	36.7	6.19	30.76	3	0	1	1.25673e+07	1.45991e+07	1.29076e+07	1.27888e+07	1.37228e+07	1.34159e+07	1.33408e+07	1.29979e+07
A0A452ES57	DnaJ heat shock protein family (Hsp40) member B4	DNAJB4	DnaJ heat shock protein family (Hsp40) member B4 OS=Capra hircus OX=9925 GN=DNAJB4 PE=4 SV=1	29.945	24	7	14	7	337	37.8	8.51	45.04	7	0	1	5.86966e+07	6.30367e+07	6.03254e+07	5.13421e+07	6.08017e+07	5.83787e+07	6.15994e+07	6.07638e+07
A0A452FJ00	Rae1 protein homolog	RAE1	Rae1 protein homolog OS=Capra hircus OX=9925 GN=RAE1 PE=3 SV=1	29.844	16	5	25	5	368	41	7.83	75.29	5	0	1	8.3598e+07	8.24504e+07	8.37442e+07	7.30049e+07	8.66253e+07	9.09199e+07	8.81975e+07	8.47799e+07
A0A452FZV4	Protein arginine methyltransferase NDUFAF7	NDUFAF7	Protein arginine methyltransferase NDUFAF7 OS=Capra hircus OX=9925 GN=NDUFAF7 PE=3 SV=1	29.806	15	7	18	7	441	49.4	6.71	45.69	7	0	1	2.81293e+07	3.83033e+07	2.75627e+07	2.40835e+07	2.90872e+07	2.74437e+07	2.76233e+07	2.65544e+07
A0A452E1U1	Peroxiredoxin-1	PRDX1	Peroxiredoxin-1 OS=Capra hircus OX=9925 GN=PRDX1 PE=3 SV=1	29.761	28	6	16	4	206	22.9	8.22	48.47	6	2	1	8.63752e+07	8.87656e+07	8.63797e+07	1.44211e+08	7.62964e+07	9.31827e+07	9.2264e+07	8.97832e+07
A0A452ETK7	Coenzyme A synthase	COASY	Coenzyme A synthase OS=Capra hircus OX=9925 GN=COASY PE=3 SV=1	29.697	13	7	10	7	562	61.9	7.46	29.8	7	0	1	2.2908e+07	2.71509e+07	2.53369e+07	2.20563e+07	2.51299e+07	2.33965e+07	2.77279e+07	2.91231e+07
A0A452F6W7	Seminal plasma protein BSP-30 kDa-like	LOC108638072	Seminal plasma protein BSP-30 kDa-like OS=Capra hircus OX=9925 GN=LOC108638072 PE=4 SV=1	29.671	26	5	48	3	152	18	5.9	155.11	5	3	1	4.73267e+08	4.17137e+08	4.55454e+08	7.88475e+08	4.33022e+08	4.39221e+08	3.797e+08	3.85767e+08
A0A452E1I6	Enoyl-CoA delta isomerase 1	ECI1	Enoyl-CoA delta isomerase 1 OS=Capra hircus OX=9925 GN=ECI1 PE=4 SV=1	29.647	19	6	21	6	306	33.7	8.16	69.8	6	0	1	9.19485e+07	1.07028e+08	1.02475e+08	1.00999e+08	9.75352e+07	9.02991e+07	9.93127e+07	1.10402e+08
A0A452FL07	G protein-coupled receptor kinase	GRK3	G protein-coupled receptor kinase OS=Capra hircus OX=9925 GN=GRK3 PE=3 SV=1	29.635	10	6	12	6	662	76.7	7.49	27.08	6	0	1	1.87153e+07	1.95779e+07	2.01572e+07	1.75442e+07	1.92964e+07	1.99932e+07	1.93607e+07	1.97705e+07
A0A452G5E4	Nucleoside-diphosphate kinase		Nucleoside-diphosphate kinase OS=Capra hircus OX=9925 PE=4 SV=1	29.618	22	9	19	9	426	49.6	9.17	51.92	9	0	1	3.03652e+07	3.37952e+07	3.27048e+07	3.31854e+07	3.22643e+07	3.33258e+07	3.17105e+07	3.31066e+07
A0A452DTC5	Centrin 1	CETN1	Centrin 1 OS=Capra hircus OX=9925 GN=CETN1 PE=3 SV=1	29.6	34	8	26	6	172	19.6	4.94	58.82	8	2	1	1.07873e+08	1.12244e+08	1.05763e+08	9.34243e+07	1.05171e+08	8.78988e+07	1.01624e+08	9.33245e+07
A0A452EAX9	Non-specific serine/threonine protein kinase	CSNK1G2	Non-specific serine/threonine protein kinase OS=Capra hircus OX=9925 GN=CSNK1G2 PE=3 SV=1	29.52	16	8	11	8	414	47.2	9.06	28.76	8	0	1	2.39461e+07	2.45377e+07	2.09361e+07	2.53361e+07	1.61138e+07	1.98009e+07	2.33928e+07	2.3485e+07
A0A452EAB1	Proteasome subunit alpha type	PSMA4	Proteasome subunit alpha type OS=Capra hircus OX=9925 GN=PSMA4 PE=3 SV=1	29.485	27	8	29	8	284	32	7.69	72.52	8	0	1	1.13204e+08	1.15115e+08	1.26866e+08	1.237e+08	1.15708e+08	1.169e+08	1.36525e+08	1.36681e+08
A0A452FIY4	Testis specific serine kinase 3	TSSK3	Testis specific serine kinase 3 OS=Capra hircus OX=9925 GN=TSSK3 PE=4 SV=1	29.475	18	5	14	4	269	30.1	6.71	45.29	5	0	1	3.17379e+07	3.13419e+07	3.59933e+07	3.47026e+07	3.38178e+07	3.25302e+07	3.70946e+07	3.45686e+07
A0A452ERE8	BPTI/Kunitz inhibitor domain-containing protein		BPTI/Kunitz inhibitor domain-containing protein OS=Capra hircus OX=9925 PE=4 SV=1	29.388	34	6	23	6	122	13.7	6.51	53.9	6	0	1	1.1367e+08	1.00414e+08	9.38492e+07	1.14449e+08	1.16897e+08	1.05912e+08	1.02231e+08	1.01043e+08
A0A452EHJ6	Hydroxyacyl-CoA dehydrogenase	HADH	Hydroxyacyl-CoA dehydrogenase OS=Capra hircus OX=9925 GN=HADH PE=3 SV=1	29.251	21	7	28	7	314	34.3	9.19	86.74	7	0	1	3.03713e+08	3.24047e+08	3.41134e+08	3.92499e+08	3.45371e+08	2.97993e+08	3.28227e+08	3.62185e+08
A0A452FAZ1	Proteasome subunit beta	PSMB4	Proteasome subunit beta OS=Capra hircus OX=9925 GN=PSMB4 PE=3 SV=1	29.167	20	4	12	4	264	29	5.67	38.43	4	0	1	5.60799e+07	5.04522e+07	6.07371e+07	4.23876e+07	5.53455e+07	5.53494e+07	6.12221e+07	6.02464e+07
A0A452ECN4	Proteasome subunit alpha type	PSMA2	Proteasome subunit alpha type OS=Capra hircus OX=9925 GN=PSMA2 PE=3 SV=1	29.07	19	3	16	3	234	25.9	7.43	62.06	3	0	1	2.9664e+07	3.44759e+07	3.47871e+07	4.40818e+07	3.29655e+07	3.38093e+07	3.92743e+07	4.00946e+07
A0A452F341	Beta-MPP	PMPCB	Beta-MPP OS=Capra hircus OX=9925 GN=PMPCB PE=3 SV=1	29.031	19	7	14	6	492	54.7	6.32	50.59	7	0	1	1.9434e+07	2.03295e+07	1.90532e+07	1.74176e+07	1.87046e+07	1.90201e+07	1.91251e+07	1.9459e+07
A0A452F216	Hydroxysteroid 17-beta dehydrogenase 8	HSD17B8	Hydroxysteroid 17-beta dehydrogenase 8 OS=Capra hircus OX=9925 GN=HSD17B8 PE=3 SV=1	29.029	18	3	7	3	248	25.3	7.27	24.14	3	0	1	1.87135e+07	1.72459e+07	1.93036e+07	1.65542e+07	1.90286e+07	1.83447e+07	2.06454e+07	1.92198e+07
A0A452DW82	Proteasome 26S subunit, non-ATPase 11	PSMD11	Proteasome 26S subunit, non-ATPase 11 OS=Capra hircus OX=9925 GN=PSMD11 PE=3 SV=1	29.016	12	5	9	5	422	47.4	6.48	31.64	5	0	1	2.9771e+07	2.86284e+07	3.21261e+07	3.04088e+07	3.19497e+07	2.93582e+07	3.39694e+07	3.41488e+07
A0A452E4E8	Microsomal signal peptidase 25 kDa subunit	SPCS2	Microsomal signal peptidase 25 kDa subunit OS=Capra hircus OX=9925 GN=SPCS2 PE=3 SV=1	28.954	30	9	17	9	238	27.5	8.53	46.97	9	0	1	1.16806e+08	1.20726e+08	1.21359e+08	1.11231e+08	1.17217e+08	1.09956e+08	1.19963e+08	1.22194e+08
A0A452EM54	Solute carrier family 25 member 40	LOC102176015	Solute carrier family 25 member 40 OS=Capra hircus OX=9925 GN=LOC102176015 PE=3 SV=1	28.789	20	6	9	6	338	38.2	9.22	23.91	6	0	1	3.34953e+07	3.59823e+07	3.63501e+07	3.47678e+07	3.7685e+07	3.40476e+07	3.704e+07	3.84431e+07
A0A452DXN4	Mitochondrial ornithine transporter 2	SLC25A2	Mitochondrial ornithine transporter 2 OS=Capra hircus OX=9925 GN=SLC25A2 PE=3 SV=1	28.677	17	6	16	6	301	32.7	8.92	49.61	6	0	1	7.92272e+07	8.55422e+07	8.16835e+07	7.82815e+07	8.23572e+07	7.93983e+07	8.256e+07	8.48922e+07
A0A452EVE3	Tyrosine-protein kinase	FER	Tyrosine-protein kinase OS=Capra hircus OX=9925 GN=FER PE=3 SV=1	28.631	9	8	21	8	821	94.6	7.27	54.08	8	0	1	8.78378e+07	9.18418e+07	8.85439e+07	8.56096e+07	8.79265e+07	9.37411e+07	8.54487e+07	8.75242e+07
A0A452FNW0	Elongation factor 1-gamma	EEF1G	Elongation factor 1-gamma OS=Capra hircus OX=9925 GN=EEF1G PE=4 SV=1	28.587	21	11	21	11	440	50.3	6.74	49.22	11	0	1	5.60348e+07	5.94417e+07	6.04325e+07	6.62506e+07	5.92162e+07	6.48482e+07	6.20875e+07	6.16201e+07
A0A452FUZ1	DnaJ heat shock protein family (Hsp40) member C5 beta	DNAJC5B	DnaJ heat shock protein family (Hsp40) member C5 beta OS=Capra hircus OX=9925 GN=DNAJC5B PE=4 SV=1	28.577	31	5	14	5	199	22.7	5.9	47.47	5	0	1	4.72458e+07	4.87398e+07	4.82368e+07	4.55867e+07	5.03046e+07	4.61832e+07	5.38291e+07	4.91856e+07
A0A452ENV4	Keratin 79	KRT79	Keratin 79 OS=Capra hircus OX=9925 GN=KRT79 PE=3 SV=1	28.534	11	7	23	1	535	57.8	7.75	69.98	7	1	1	2.83774e+07	2.68165e+07	2.95461e+07	2.41469e+07	3.11954e+07	3.20534e+07	3.72063e+07	3.05781e+07
A0A452DQU6	Prolyl-tRNA synthetase	PARS2	Prolyl-tRNA synthetase OS=Capra hircus OX=9925 GN=PARS2 PE=4 SV=1	28.497	14	6	13	6	475	53.3	7.97	32.75	6	0	1	1.77689e+07	2.04082e+07	1.91583e+07	1.81076e+07	1.94025e+07	1.93023e+07	1.95768e+07	2.04969e+07
A0A452F2A8	L-serine ammonia-lyase	SRR	L-serine ammonia-lyase OS=Capra hircus OX=9925 GN=SRR PE=4 SV=1	28.442	23	6	9	6	334	35.9	6.24	31.24	6	0	1	1.26259e+07	1.36575e+07	1.30486e+07	1.23348e+07	1.31282e+07	1.34832e+07	1.35736e+07	1.3548e+07
A0A452EC98	Oxoglutarate dehydrogenase (succinyl-transferring)	DHTKD1	Oxoglutarate dehydrogenase (succinyl-transferring) OS=Capra hircus OX=9925 GN=DHTKD1 PE=3 SV=1	28.401	8	6	16	6	921	102.9	6.86	54.18	6	0	1	3.59898e+07	3.77704e+07	3.74682e+07	3.27576e+07	3.79798e+07	3.92357e+07	3.75025e+07	3.84816e+07
A0A452FQ73	Keratin, type II cytoskeletal 73	KRT73	Keratin, type II cytoskeletal 73 OS=Capra hircus OX=9925 GN=KRT73 PE=3 SV=1	28.378	8	5	25	1	540	58.8	7.83	68.23	5	0	1	122071	168314	111947	100075	123633	148323	111302	96472.5
A0A452DWL7	Retinal rod rhodopsin-sensitive cGMP 3',5'-cyclic phosphodiesterase subunit delta	PDE6D	Retinal rod rhodopsin-sensitive cGMP 3',5'-cyclic phosphodiesterase subunit delta OS=Capra hircus OX=9925 GN=PDE6D PE=3 SV=1	28.362	30	3	9	3	144	16.7	6.55	31.77	3	0	1	2.2873e+07	2.3739e+07	2.31044e+07	2.21472e+07	2.40091e+07	2.09481e+07	2.29098e+07	2.35851e+07
A0A452DZI9	Complex I-B14.5a	NDUFA7	Complex I-B14.5a OS=Capra hircus OX=9925 GN=NDUFA7 PE=3 SV=1	28.345	54	7	36	7	126	14	10.46	95.89	7	0	1	1.48529e+08	1.52643e+08	1.5686e+08	1.37998e+08	1.55745e+08	1.51735e+08	1.54294e+08	1.64906e+08
A0A452EE00	MICOS complex subunit	APOO	MICOS complex subunit OS=Capra hircus OX=9925 GN=APOO PE=3 SV=1	28.274	18	3	17	3	198	22.5	9.1	70.17	3	0	1	7.97059e+07	1.00443e+08	7.56313e+07	1.02245e+08	7.46989e+07	7.72832e+07	8.00931e+07	8.16972e+07
P80601	2-iminobutanoate/2-iminopropanoate deaminase	RIDA	2-iminobutanoate/2-iminopropanoate deaminase OS=Capra hircus OX=9925 GN=RIDA PE=1 SV=3	28.18	33	3	10	3	137	14.3	6.65	33.06	3	0	1	3.03066e+07	2.33645e+07	3.04549e+07	2.0783e+07	2.6276e+07	2.7773e+07	3.03964e+07	3.03563e+07
A0A452EC60	HECT and RLD domain containing E3 ubiquitin protein ligase 4	HERC4	HECT and RLD domain containing E3 ubiquitin protein ligase 4 OS=Capra hircus OX=9925 GN=HERC4 PE=4 SV=1	28.134	6	6	11	6	1081	121	6.19	35.41	6	0	1	6.67826e+06	7.30985e+06	6.78382e+06	6.84311e+06	6.67585e+06	7.20749e+06	6.42976e+06	6.51816e+06
A0A452ETK6	Polyamine oxidase	PAOX	Polyamine oxidase OS=Capra hircus OX=9925 GN=PAOX PE=4 SV=1	28.057	20	9	14	9	512	56.1	6.14	35.1	9	0	1	5.03277e+07	5.06327e+07	5.11685e+07	4.93531e+07	4.92923e+07	5.37743e+07	5.42617e+07	5.45857e+07
A0A452ER33	Chromosome 11 C9orf116 homolog	C9orf116	Chromosome 11 C9orf116 homolog OS=Capra hircus OX=9925 GN=C9orf116 PE=4 SV=1	28.023	37	5	29	5	136	15.7	7.78	84.95	5	0	1	1.06198e+08	1.13682e+08	1.16058e+08	9.70161e+07	1.09746e+08	1.10328e+08	1.1396e+08	1.18896e+08
A0A452E2A9	Aminoacyl-tRNA hydrolase	PTRH2	Aminoacyl-tRNA hydrolase OS=Capra hircus OX=9925 GN=PTRH2 PE=4 SV=1	28	32	4	12	4	179	19.2	8.43	43.54	4	0	1	1.99112e+07	2.20419e+07	2.08172e+07	1.97774e+07	2.18207e+07	1.97775e+07	2.18606e+07	2.29397e+07
A0A452FPF3	Phosphoinositide phospholipase C	PLCD4	Phosphoinositide phospholipase C OS=Capra hircus OX=9925 GN=PLCD4 PE=4 SV=1	27.948	14	9	14	9	793	90.8	5.34	40	9	0	1	3.40779e+07	3.54531e+07	3.58931e+07	3.10333e+07	3.49899e+07	3.61882e+07	3.61265e+07	3.74035e+07
A0A452DVS8	DNA damage inducible 1 homolog 1	DDI1	DNA damage inducible 1 homolog 1 OS=Capra hircus OX=9925 GN=DDI1 PE=3 SV=1	27.928	10	4	13	4	459	51	7.78	45.74	4	0	1	2.57938e+07	2.75097e+07	2.7551e+07	2.48118e+07	2.60575e+07	2.7376e+07	2.72947e+07	2.81208e+07
A0A452F5H6	Outer dense fiber of sperm tails 3B	ODF3B	Outer dense fiber of sperm tails 3B OS=Capra hircus OX=9925 GN=ODF3B PE=4 SV=1	27.924	22	6	22	6	300	31.8	10.89	50.06	6	0	1	7.82984e+07	7.84383e+07	8.38009e+07	7.69887e+07	9.04935e+07	8.35337e+07	8.41582e+07	8.89497e+07
A0A452F6V6	Dynein light chain	DNAL4	Dynein light chain OS=Capra hircus OX=9925 GN=DNAL4 PE=3 SV=1	27.922	25	3	32	3	105	12	5.49	80.87	3	0	1	1.33508e+08	1.22234e+08	1.3597e+08	1.32172e+08	1.33131e+08	1.34255e+08	1.25914e+08	1.22415e+08
A0A452FP89	Progesterone receptor membrane component 2	PGRMC2	Progesterone receptor membrane component 2 OS=Capra hircus OX=9925 GN=PGRMC2 PE=4 SV=1	27.879	17	4	13	4	247	26.1	5.3	47.82	4	0	1	5.09874e+07	5.15673e+07	4.92666e+07	4.7377e+07	5.22192e+07	4.83484e+07	5.05341e+07	4.88622e+07
A0A452EEP6	Metaxin	MTX1	Metaxin OS=Capra hircus OX=9925 GN=MTX1 PE=3 SV=1	27.75	18	6	9	6	330	37.1	6.38	31.72	6	0	1	2.98737e+07	3.21502e+07	3.13389e+07	3.55657e+07	2.79293e+07	2.91649e+07	3.21876e+07	3.48903e+07
A0A452DN85	Complex I-23kD		Complex I-23kD OS=Capra hircus OX=9925 PE=3 SV=1	27.701	25	6	29	6	209	23.4	6.2	78.98	6	0	1	1.5939e+08	1.68704e+08	1.6261e+08	1.51786e+08	1.55528e+08	1.47473e+08	1.59234e+08	1.60387e+08
A0A452EWF1	Alpha-mannosidase	LOC102188844	Alpha-mannosidase OS=Capra hircus OX=9925 GN=LOC102188844 PE=3 SV=1	27.658	8	6	11	1	992	112.9	7.44	32.46	6	0	1	1.0437e+06	1.09567e+06	1.03692e+06	893371	1.0932e+06	1.08376e+06	1.09105e+06	1.05383e+06
A0A452FC85	ATPase family AAA domain-containing protein 3	ATAD3A	ATPase family AAA domain-containing protein 3 OS=Capra hircus OX=9925 GN=ATAD3A PE=4 SV=1	27.657	16	11	18	11	570	64.2	9.04	42.22	11	0	1	7.716e+07	7.66537e+07	8.37169e+07	7.98599e+07	7.93285e+07	7.03069e+07	7.45001e+07	8.39855e+07
A0A452EIN3	Testis expressed 49	TEX49	Testis expressed 49 OS=Capra hircus OX=9925 GN=TEX49 PE=4 SV=1	27.652	41	5	16	5	131	15.5	9.66	35.62	5	0	1	3.60697e+07	3.66621e+07	3.84906e+07	3.91048e+07	3.74932e+07	3.72107e+07	3.66131e+07	3.82236e+07
A0A452DXZ3	Metaxin 2	MTX2	Metaxin 2 OS=Capra hircus OX=9925 GN=MTX2 PE=3 SV=1	27.635	13	3	18	3	264	29.7	6.29	49.53	3	0	1	5.48177e+07	7.65161e+07	5.72379e+07	6.79784e+07	4.84993e+07	5.27407e+07	5.80894e+07	5.78723e+07
A0A452FF42	Elongation factor Tu	TUFM	Elongation factor Tu OS=Capra hircus OX=9925 GN=TUFM PE=3 SV=1	27.608	20	8	11	8	452	49.4	7.2	34.55	8	0	1	2.92274e+07	2.89552e+07	2.87629e+07	3.1456e+07	3.0841e+07	3.08076e+07	2.95988e+07	3.03324e+07
A0A452DN34	Abhydrolase domain containing 16B	ABHD16B	Abhydrolase domain containing 16B OS=Capra hircus OX=9925 GN=ABHD16B PE=4 SV=1	27.567	16	7	24	7	470	52.6	8.57	77.91	7	0	1	5.38035e+07	5.34102e+07	5.29755e+07	4.55706e+07	5.44359e+07	5.3671e+07	6.04744e+07	5.35411e+07
A0A452FEX1	Lipid phosphate phosphohydrolase 1	PLPP1	Lipid phosphate phosphohydrolase 1 OS=Capra hircus OX=9925 GN=PLPP1 PE=3 SV=1	27.523	10	2	8	2	285	32.3	8.7	29.94	2	0	1	2.20173e+07	2.37765e+07	2.23277e+07	1.89956e+07	2.02653e+07	2.02227e+07	2.16879e+07	2.17177e+07
A0A452DJQ6	Apoptosis inducing factor mitochondria associated 1	AIFM1	Apoptosis inducing factor mitochondria associated 1 OS=Capra hircus OX=9925 GN=AIFM1 PE=3 SV=1	27.522	15	8	12	8	609	66.2	9.11	39.45	8	0	1	2.23991e+07	2.90891e+07	2.21948e+07	2.38372e+07	2.2792e+07	2.24125e+07	2.16031e+07	2.12402e+07
A0A452FL30	Armadillo like helical domain containing 1	ARMH1	Armadillo like helical domain containing 1 OS=Capra hircus OX=9925 GN=ARMH1 PE=4 SV=1	27.45	22	8	14	8	453	50.5	6.34	44	8	0	1	6.85498e+07	7.86802e+07	7.16608e+07	6.46256e+07	7.06627e+07	6.77475e+07	7.14844e+07	7.10701e+07
A0A452DP89	Fructose-bisphosphate aldolase	ALDOB	Fructose-bisphosphate aldolase OS=Capra hircus OX=9925 GN=ALDOB PE=3 SV=1	27.351	13	5	25	3	364	39.5	8.46	75.71	5	0	1	1.78496e+07	1.85624e+07	1.82927e+07	4.16392e+07	1.67239e+07	2.10961e+07	1.90985e+07	1.82774e+07
A0A452F429	Ubiquitin carboxyl-terminal hydrolase	UCHL3	Ubiquitin carboxyl-terminal hydrolase OS=Capra hircus OX=9925 GN=UCHL3 PE=3 SV=1	27.319	17	3	10	3	230	26.2	4.98	32.74	3	0	1	3.91282e+07	4.02057e+07	3.95474e+07	4.71861e+07	4.05222e+07	4.08152e+07	4.10045e+07	4.1283e+07
A0A452EAA3	ADP ribosylation factor like GTPase 8B	ARL8B	ADP ribosylation factor like GTPase 8B OS=Capra hircus OX=9925 GN=ARL8B PE=3 SV=1	27.269	29	5	23	4	149	17.1	8.24	71.77	5	1	1	1.08106e+08	1.09546e+08	1.06942e+08	9.73394e+07	1.09817e+08	1.0356e+08	1.15236e+08	1.09326e+08
A0A452EA46	BCL2 associated athanogene 5	BAG5	BCL2 associated athanogene 5 OS=Capra hircus OX=9925 GN=BAG5 PE=4 SV=1	27.192	17	6	8	6	447	51	5.82	27.27	6	0	1	1.98895e+07	1.88765e+07	2.01494e+07	2.14367e+07	2.3903e+07	2.11196e+07	2.17161e+07	2.0655e+07
A0A452G8B2	Cytochrome b5 type B	CYB5B	Cytochrome b5 type B OS=Capra hircus OX=9925 GN=CYB5B PE=3 SV=1	27.171	56	5	12	5	144	16.1	5.16	48.82	5	0	1	3.69236e+07	3.57078e+07	3.51195e+07	3.65114e+07	3.66229e+07	3.5114e+07	3.66113e+07	3.69206e+07
A0A452E2X9	Adenylate cyclase 10	ADCY10	Adenylate cyclase 10 OS=Capra hircus OX=9925 GN=ADCY10 PE=4 SV=1	27.068	6	10	14	1	1604	185.4	6.77	37.58	10	0	1	3.02242e+06	2.86362e+06	2.98696e+06	2.62617e+06	3.06731e+06	3.11444e+06	3.08502e+06	3.11067e+06
A0A452F096	Complex III subunit 8	UQCRQ	Complex III subunit 8 OS=Capra hircus OX=9925 GN=UQCRQ PE=3 SV=1	26.991	21	3	36	3	82	9.7	10.33	134.13	3	0	1	1.31713e+08	1.33614e+08	1.42069e+08	2.14224e+08	1.56293e+08	1.37955e+08	1.38986e+08	1.54874e+08
A0A452F9X8	Aladin WD repeat nucleoporin	AAAS	Aladin WD repeat nucleoporin OS=Capra hircus OX=9925 GN=AAAS PE=4 SV=1	26.866	14	6	11	6	547	59.8	7.77	38.3	6	0	1	3.67663e+07	4.13154e+07	3.98763e+07	3.48243e+07	3.89172e+07	3.72706e+07	3.88966e+07	4.0575e+07
A0A452ETY1	Cytochrome c oxidase subunit 7A2, mitochondrial	LOC102188675	Cytochrome c oxidase subunit 7A2, mitochondrial OS=Capra hircus OX=9925 GN=LOC102188675 PE=3 SV=1	26.825	28	2	6	2	83	9.3	9.99	25.31	2	0	1	8.51862e+07	8.91209e+07	9.16467e+07	1.20824e+08	9.04559e+07	1.15333e+08	8.70306e+07	1.00612e+08
A0A452DSR1	Inositol polyphosphate-1-phosphatase	INPP1	Inositol polyphosphate-1-phosphatase OS=Capra hircus OX=9925 GN=INPP1 PE=3 SV=1	26.805	9	3	8	3	391	42.8	5.21	32.6	3	0	1	1.45356e+07	1.65878e+07	1.50611e+07	1.48529e+07	1.5688e+07	1.63104e+07	1.67713e+07	1.74489e+07
A0A452ECD2	Histone H2A	H2AX	Histone H2A OS=Capra hircus OX=9925 GN=H2AX PE=3 SV=1	26.713	38	5	27	2	143	15.1	10.74	62.1	5	4	1	2.25289e+08	2.37526e+08	2.65912e+08	4.28383e+08	3.14993e+08	2.31827e+08	2.53666e+08	2.98246e+08
A0A1Q1N997	Proteasome subunit beta (Fragment)	PSMB1	Proteasome subunit beta (Fragment) OS=Capra hircus OX=9925 GN=PSMB1 PE=2 SV=1	26.691	28	5	18	5	241	26.3	7.81	62.22	5	0	1	5.56562e+07	6.06183e+07	6.15594e+07	5.53627e+07	5.93029e+07	5.6556e+07	6.47448e+07	6.50252e+07
A0A452FQQ1	Patatin like phospholipase domain containing 8	PNPLA8	Patatin like phospholipase domain containing 8 OS=Capra hircus OX=9925 GN=PNPLA8 PE=4 SV=1	26.629	11	8	12	8	784	88.6	9.14	37.69	8	0	1	3.24109e+07	3.45902e+07	3.40512e+07	3.12537e+07	3.38297e+07	3.32992e+07	3.52562e+07	3.55976e+07
A0A452G2E0	MORN repeat-containing protein 5	MORN5	MORN repeat-containing protein 5 OS=Capra hircus OX=9925 GN=MORN5 PE=4 SV=1	26.599	36	5	17	5	172	19.9	4.96	52.42	5	0	1	8.43093e+07	8.62791e+07	8.08145e+07	7.4897e+07	7.25971e+07	8.2107e+07	8.49767e+07	8.49087e+07
A0A452G580	Chromosome 20 C5orf49 homolog	C5orf49	Chromosome 20 C5orf49 homolog OS=Capra hircus OX=9925 GN=C5orf49 PE=4 SV=1	26.58	28	6	18	6	180	20.6	9.14	55.79	6	0	1	8.21588e+07	8.66392e+07	8.13559e+07	6.97848e+07	8.65652e+07	8.12735e+07	7.97048e+07	7.85689e+07
A0A452F5G4	Protein disulfide isomerase like, testis expressed	PDILT	Protein disulfide isomerase like, testis expressed OS=Capra hircus OX=9925 GN=PDILT PE=4 SV=1	26.528	12	7	15	7	578	66.6	5.2	30	7	0	1	3.02914e+07	3.22619e+07	3.08498e+07	2.83202e+07	3.1406e+07	3.02466e+07	3.0176e+07	2.93192e+07
A0A452EPK0	Ubiquitin-like domain-containing protein		Ubiquitin-like domain-containing protein OS=Capra hircus OX=9925 PE=4 SV=1	26.507	63	7	40	7	118	13.2	5.01	127	7	0	1	2.52244e+08	2.59692e+08	2.63301e+08	2.51483e+08	2.61251e+08	2.46416e+08	2.63571e+08	2.58599e+08
A0A452ETH4	Cilia and flagella associated protein 99	CFAP99	Cilia and flagella associated protein 99 OS=Capra hircus OX=9925 GN=CFAP99 PE=4 SV=1	26.475	10	7	12	7	687	77.9	9.94	30.9	7	0	1	2.2082e+07	2.15499e+07	2.17452e+07	2.30389e+07	2.42509e+07	2.3603e+07	2.1014e+07	2.19381e+07
A0A452G3P7	26S proteasome non-ATPase regulatory subunit 4	PSMD4	26S proteasome non-ATPase regulatory subunit 4 OS=Capra hircus OX=9925 GN=PSMD4 PE=3 SV=1	26.439	15	3	5	3	377	40.8	4.79	18.84	3	0	1	1.9273e+07	2.1748e+07	2.09589e+07	1.82828e+07	1.79975e+07	1.95836e+07	2.24754e+07	2.38468e+07
A0A452F862	Protein kinase X-linked	PRKX	Protein kinase X-linked OS=Capra hircus OX=9925 GN=PRKX PE=3 SV=1	26.363	25	10	25	9	347	39.7	6.76	63.81	10	1	1	1.6235e+08	1.67223e+08	1.65023e+08	1.56132e+08	1.67532e+08	1.62431e+08	1.64602e+08	1.67256e+08
A0A452F0T2	Ciliogenesis-associated TTC17-interacting protein	CATIP	Ciliogenesis-associated TTC17-interacting protein OS=Capra hircus OX=9925 GN=CATIP PE=4 SV=1	26.335	11	4	16	4	383	43.6	5.97	52.03	4	0	1	5.60847e+07	5.81663e+07	5.80218e+07	5.36421e+07	5.79332e+07	5.57941e+07	5.78621e+07	5.55094e+07
A0A452FZP2	Isochorismatase domain containing 2	ISOC2	Isochorismatase domain containing 2 OS=Capra hircus OX=9925 GN=ISOC2 PE=3 SV=1	26.259	26	3	8	3	204	22.4	8.38	36.41	3	0	1	2.87835e+07	3.03991e+07	2.99936e+07	2.99936e+07	3.61972e+07	3.07895e+07	3.0143e+07	3.3099e+07
A0A452E621	Serine rich single-pass membrane protein 1	SSMEM1	Serine rich single-pass membrane protein 1 OS=Capra hircus OX=9925 GN=SSMEM1 PE=4 SV=1	26.243	23	5	20	5	241	27.7	8.22	66.88	5	0	1	1.11063e+08	6.42269e+07	7.67903e+07	5.24009e+07	9.75438e+07	8.41065e+07	1.2925e+08	6.5158e+07
A0A452DTV3	Nitrilase 1	NIT1	Nitrilase 1 OS=Capra hircus OX=9925 GN=NIT1 PE=3 SV=1	26.15	15	3	9	3	327	36.1	7.39	27.17	3	0	1	9.50938e+06	1.08175e+07	9.79393e+06	8.9329e+06	9.83938e+06	9.3942e+06	1.0871e+07	1.07892e+07
A0A452EDD6	Chromosome 7 C19orf71 homolog	C7H19orf71	Chromosome 7 C19orf71 homolog OS=Capra hircus OX=9925 GN=C7H19orf71 PE=4 SV=1	26.137	15	3	21	3	211	23.2	9.66	73.37	3	0	1	8.81279e+07	9.1914e+07	9.37754e+07	8.49354e+07	8.89261e+07	9.62919e+07	8.97928e+07	9.26242e+07
A0A452FHH1	AP complex subunit beta	AP1B1	AP complex subunit beta OS=Capra hircus OX=9925 GN=AP1B1 PE=3 SV=1	26.116	9	7	13	7	939	103.3	5.16	41.48	7	0	1	4.43924e+07	4.78853e+07	4.5637e+07	4.47096e+07	4.73883e+07	5.07761e+07	4.88265e+07	5.2106e+07
A0A452E125	ATP synthase subunit d, mitochondrial		ATP synthase subunit d, mitochondrial OS=Capra hircus OX=9925 PE=3 SV=1	26.081	35	4	31	2	156	18.1	7.91	86.29	4	0	1	5.65314e+07	6.31464e+07	6.72274e+07	9.07205e+07	8.66711e+07	5.57081e+07	6.2216e+07	7.5703e+07
A0A452FV43	Caseinolytic mitochondrial matrix peptidase chaperone subunit	CLPX	Caseinolytic mitochondrial matrix peptidase chaperone subunit OS=Capra hircus OX=9925 GN=CLPX PE=4 SV=1	26.036	13	7	13	7	619	67.4	7.56	32.72	7	0	1	1.73775e+07	1.85921e+07	1.81695e+07	1.6106e+07	1.83862e+07	1.81143e+07	1.92299e+07	1.8658e+07
A0A452EB53	Protein-serine/threonine kinase	PDK1	Protein-serine/threonine kinase OS=Capra hircus OX=9925 GN=PDK1 PE=3 SV=1	25.959	17	6	14	6	438	49.4	8.66	40.79	6	0	1	4.9466e+07	5.09527e+07	5.01857e+07	4.67978e+07	4.87904e+07	5.24283e+07	5.04215e+07	5.01025e+07
A0A452G0F9	NADH dehydrogenase [ubiquinone] 1 subunit C2	NDUFC2	NADH dehydrogenase [ubiquinone] 1 subunit C2 OS=Capra hircus OX=9925 GN=NDUFC2 PE=3 SV=1	25.843	34	5	28	5	120	14.2	9.23	85.55	5	0	1	5.26582e+07	5.2673e+07	5.24815e+07	6.55339e+07	6.28014e+07	6.03926e+07	5.17168e+07	5.66016e+07
A0A452FYA5	Cell cycle control protein	LOC102177192	Cell cycle control protein OS=Capra hircus OX=9925 GN=LOC102177192 PE=3 SV=1	25.741	13	5	17	5	343	38.9	9.2	50.86	5	0	1	4.68849e+07	4.71123e+07	4.81922e+07	4.55869e+07	4.78694e+07	4.70651e+07	4.76874e+07	4.74437e+07
A0A452EQX0	LanC like 1	LANCL1	LanC like 1 OS=Capra hircus OX=9925 GN=LANCL1 PE=3 SV=1	25.741	12	5	13	5	424	48.4	6.81	33.56	5	0	1	2.17055e+07	2.27639e+07	2.22531e+07	2.04586e+07	2.28663e+07	2.27104e+07	2.17905e+07	2.20079e+07
A0A452DLY4	Corrinoid adenosyltransferase	MMAB	Corrinoid adenosyltransferase OS=Capra hircus OX=9925 GN=MMAB PE=3 SV=1	25.706	21	4	13	4	246	26.8	8.85	46.95	4	0	1	3.1901e+07	3.34464e+07	3.54476e+07	3.21389e+07	3.38209e+07	3.17385e+07	3.31244e+07	3.34993e+07
A0A452FLN3	Regulator of microtubule dynamics 1	RMDN1	Regulator of microtubule dynamics 1 OS=Capra hircus OX=9925 GN=RMDN1 PE=4 SV=1	25.684	26	8	13	8	317	35.9	8.09	33.46	8	0	1	2.72592e+07	2.90139e+07	2.97779e+07	3.00909e+07	3.00406e+07	2.64509e+07	2.9552e+07	2.96232e+07
A0A452F1C6	Cilia and flagella associated protein 221	CFAP221	Cilia and flagella associated protein 221 OS=Capra hircus OX=9925 GN=CFAP221 PE=4 SV=1	25.635	9	8	15	8	837	96.6	8.32	47.4	8	0	1	3.417e+07	3.73402e+07	3.40305e+07	3.60528e+07	3.55008e+07	3.66873e+07	3.30419e+07	3.56233e+07
A0A452G7J1	4HBT domain-containing protein		4HBT domain-containing protein OS=Capra hircus OX=9925 PE=3 SV=1	25.634	22	3	16	1	157	16.7	7.78	51.74	3	3	1	1.67847e+08	1.73386e+08	1.918e+08	1.73526e+08	1.70411e+08	1.54938e+08	1.96418e+08	2.02464e+08
A0A452EZS5	Crystallin zeta	CRYZ	Crystallin zeta OS=Capra hircus OX=9925 GN=CRYZ PE=3 SV=1	25.617	20	7	20	7	330	35.3	8.46	61.61	7	0	1	4.42887e+07	4.86545e+07	4.46444e+07	4.42181e+07	4.64894e+07	4.54892e+07	4.55896e+07	4.73122e+07
A0A452EAB5	Seminal plasma protein PDC-109-like	LOC102182822	Seminal plasma protein PDC-109-like OS=Capra hircus OX=9925 GN=LOC102182822 PE=3 SV=1	25.562	36	5	33	5	129	14.7	5.74	106.68	5	0	1	9.0282e+08	7.98568e+08	7.48245e+08	1.50195e+09	7.16356e+08	7.30461e+08	7.71702e+08	7.44372e+08
A0A452EL29	UDP-glucose 4-epimerase	GALE	UDP-glucose 4-epimerase OS=Capra hircus OX=9925 GN=GALE PE=3 SV=1	25.526	27	8	12	8	350	38.4	7.23	28.13	8	0	1	4.678e+07	5.4609e+07	4.84717e+07	4.36642e+07	4.89136e+07	4.48789e+07	5.04768e+07	5.11233e+07
A0A452DR87	UBX domain protein 6	UBXN6	UBX domain protein 6 OS=Capra hircus OX=9925 GN=UBXN6 PE=4 SV=1	25.424	20	6	12	6	441	49.8	8.34	37.62	6	0	1	4.08935e+07	5.55569e+07	4.46458e+07	4.75441e+07	4.92134e+07	4.11412e+07	4.84913e+07	4.72459e+07
A0A452FCF6	Phosphoethanolamine/phosphocholine phosphatase 1	PHOSPHO1	Phosphoethanolamine/phosphocholine phosphatase 1 OS=Capra hircus OX=9925 GN=PHOSPHO1 PE=3 SV=1	25.377	28	8	19	8	267	29.7	7.43	55.52	8	0	1	3.92959e+07	4.15818e+07	4.09565e+07	3.64874e+07	4.00281e+07	3.97399e+07	3.95052e+07	4.13229e+07
A0A452F8I7	Small monomeric GTPase	RALB	Small monomeric GTPase OS=Capra hircus OX=9925 GN=RALB PE=3 SV=1	25.356	20	4	9	3	206	23.4	6.62	34.41	4	0	1	2.82223e+07	2.98669e+07	2.82488e+07	2.69074e+07	2.59735e+07	2.87338e+07	2.72952e+07	2.84118e+07
A0A452EW96	Malonyl-CoA-acyl carrier protein transacylase	MCAT	Malonyl-CoA-acyl carrier protein transacylase OS=Capra hircus OX=9925 GN=MCAT PE=4 SV=1	25.32	16	6	12	6	387	42.3	8.73	36.41	6	0	1	5.96427e+07	6.32676e+07	6.10751e+07	6.47843e+07	6.23383e+07	5.95728e+07	6.19232e+07	6.3427e+07
A0A452F4Q3	Kazal-like domain-containing protein		Kazal-like domain-containing protein OS=Capra hircus OX=9925 PE=4 SV=1	25.304	31	2	9	2	85	9.8	8.31	26.6	2	0	1	9.23595e+06	9.25282e+06	9.18978e+06	8.65234e+06	9.07091e+06	9.10605e+06	9.92976e+06	9.75664e+06
A0A452F948	Calcineurin-like phosphoesterase domain-containing protein 1	CPPED1	Calcineurin-like phosphoesterase domain-containing protein 1 OS=Capra hircus OX=9925 GN=CPPED1 PE=3 SV=1	25.264	19	6	11	6	313	35.8	5.8	31.18	6	0	1	3.53424e+07	3.5766e+07	3.57614e+07	3.21243e+07	3.53075e+07	3.69431e+07	3.62855e+07	3.66811e+07
A0A452DVW3	Glycerate kinase	GLYCTK	Glycerate kinase OS=Capra hircus OX=9925 GN=GLYCTK PE=3 SV=1	24.866	11	5	18	5	523	54.7	6.32	41.51	5	0	1	4.03293e+07	4.02752e+07	3.88327e+07	3.83294e+07	3.54618e+07	3.93537e+07	3.97715e+07	4.02191e+07
A0A452G9E3	Chromosome 18 C16orf78 homolog	C16orf78	Chromosome 18 C16orf78 homolog OS=Capra hircus OX=9925 GN=C16orf78 PE=4 SV=1	24.788	27	7	10	7	275	31.6	9.89	32.46	7	0	1	2.68599e+07	2.7257e+07	2.57165e+07	2.27562e+07	2.66829e+07	2.63296e+07	2.5583e+07	2.54394e+07
A0A452DZ57	Proliferation-associated 2G4	PA2G4	Proliferation-associated 2G4 OS=Capra hircus OX=9925 GN=PA2G4 PE=3 SV=1	24.735	22	8	10	8	394	43.8	6.55	25.64	8	0	1	2.49231e+07	2.55977e+07	2.4609e+07	2.35841e+07	2.52089e+07	2.55803e+07	2.47476e+07	2.45072e+07
A0A452G936			Uncharacterized protein OS=Capra hircus OX=9925 PE=4 SV=1	24.675	24	6	16	2	265	30.7	5.02	51.24	6	4	1	5.06515e+07	5.23874e+07	5.41828e+07	5.02191e+07	5.41033e+07	5.46423e+07	5.56737e+07	5.5776e+07
A0A452FB58	Solute carrier family 25 member 11	SLC25A11	Solute carrier family 25 member 11 OS=Capra hircus OX=9925 GN=SLC25A11 PE=3 SV=1	24.616	23	7	10	7	314	34.2	9.88	30.82	7	0	1	5.22281e+07	5.23804e+07	5.63699e+07	5.61597e+07	5.75318e+07	5.22305e+07	5.81496e+07	6.40794e+07
Q7YS14	LDHA protein (Fragment)	LDHA	LDHA protein (Fragment) OS=Capra hircus OX=9925 GN=LDHA PE=4 SV=1	24.597	56	2	11	1	39	4.3	5.83	43	2	0	1	3.92135e+07	3.83643e+07	3.19367e+07	3.52671e+07	2.92399e+07	3.60547e+07	3.31993e+07	2.49886e+07
A0A452FNI2	Atlastin GTPase 3	ATL3	Atlastin GTPase 3 OS=Capra hircus OX=9925 GN=ATL3 PE=3 SV=1	24.554	15	7	12	7	544	61.1	5.71	31.43	7	0	1	3.781e+07	4.01633e+07	3.49087e+07	3.13546e+07	4.12015e+07	4.35206e+07	3.63738e+07	3.49363e+07
A0A452EFQ3	Chromosome 3 C1orf189 homolog	C1orf189	Chromosome 3 C1orf189 homolog OS=Capra hircus OX=9925 GN=C1orf189 PE=4 SV=1	24.517	37	3	12	3	97	11.7	9.72	33.6	3	0	1	5.67536e+07	6.22026e+07	6.48942e+07	6.34612e+07	6.69163e+07	5.67168e+07	6.58569e+07	7.08679e+07
A0A452DRQ1	Acetyl-CoA C-myristoyltransferase	SCP2	Acetyl-CoA C-myristoyltransferase OS=Capra hircus OX=9925 GN=SCP2 PE=3 SV=1	24.477	12	6	11	6	523	56.5	8.29	31.56	6	0	1	2.18744e+07	2.37544e+07	2.35685e+07	9.24653e+07	1.79784e+07	3.27412e+07	2.36768e+07	2.52423e+07
A0A452FZ55	Phosphoenolpyruvate carboxykinase (GTP)	PCK2	Phosphoenolpyruvate carboxykinase (GTP) OS=Capra hircus OX=9925 GN=PCK2 PE=3 SV=1	24.411	11	6	8	6	640	70.7	8	23.84	6	0	1	2.21953e+07	2.14132e+07	1.92115e+07	1.73577e+07	1.75045e+07	2.06577e+07	1.86705e+07	2.14301e+07
A0A452EP53	Sperm tail PG-rich repeat containing 1	STPG1	Sperm tail PG-rich repeat containing 1 OS=Capra hircus OX=9925 GN=STPG1 PE=4 SV=1	24.41	20	6	11	6	335	37	9.67	40.31	6	0	1	1.86354e+07	1.99335e+07	1.83713e+07	1.71482e+07	1.90877e+07	1.92556e+07	1.85457e+07	1.96027e+07
A0A452FUQ2	Perilipin	PLIN3	Perilipin OS=Capra hircus OX=9925 GN=PLIN3 PE=3 SV=1	24.407	16	6	10	6	438	47.6	6.81	29.28	6	0	1	2.43285e+07	2.38363e+07	2.32458e+07	2.0946e+07	2.51164e+07	2.40922e+07	2.36738e+07	2.33593e+07
A0A452F1F7	60S acidic ribosomal protein P2	RPLP2	60S acidic ribosomal protein P2 OS=Capra hircus OX=9925 GN=RPLP2 PE=3 SV=1	24.261	31	4	7	4	115	11.7	4.54	23.29	4	0	1	2.08034e+07	2.28109e+07	2.08192e+07	2.5246e+07	2.16774e+07	2.11674e+07	2.02277e+07	2.0466e+07
A0A452DVV2	Glutaryl-CoA dehydrogenase	GCDH	Glutaryl-CoA dehydrogenase OS=Capra hircus OX=9925 GN=GCDH PE=3 SV=1	24.234	17	6	16	6	435	48.2	7.69	41.92	6	0	1	8.48085e+07	7.68472e+07	8.83649e+07	6.95147e+07	8.61287e+07	9.23352e+07	9.97462e+07	9.10321e+07
A0A452EZ43	BPI fold containing family B member 1	BPIFB1	BPI fold containing family B member 1 OS=Capra hircus OX=9925 GN=BPIFB1 PE=4 SV=1	24.234	10	3	5	3	514	56.1	6.84	22.68	3	0	1	3.78466e+06	4.59202e+06	4.10895e+06	3.99585e+06	4.218e+06	4.21624e+06	3.96334e+06	4.07555e+06
A0A452FIJ7	3-oxoacyl-[acyl-carrier-protein] synthase, mitochondrial	OXSM	3-oxoacyl-[acyl-carrier-protein] synthase, mitochondrial OS=Capra hircus OX=9925 GN=OXSM PE=3 SV=1	24.172	12	5	13	5	460	48.4	7.9	36.28	5	0	1	2.30147e+07	2.15218e+07	2.23547e+07	2.27073e+07	2.28019e+07	2.53763e+07	2.1462e+07	2.19428e+07
A0A452FMZ0	Peptidylglycine alpha-amidating monooxygenase	PAM	Peptidylglycine alpha-amidating monooxygenase OS=Capra hircus OX=9925 GN=PAM PE=3 SV=1	24.132	6	5	14	5	865	96	6.58	46.32	5	0	1	2.77971e+07	2.82256e+07	2.61955e+07	2.77385e+07	2.92205e+07	2.91353e+07	2.69263e+07	2.66738e+07
A0A452ELA7	Keratin 77	KRT77	Keratin 77 OS=Capra hircus OX=9925 GN=KRT77 PE=3 SV=1	24.043	5	3	24	1	602	63.8	7.8	86.1	3	0	1	3.28116e+07	2.91963e+07	3.3355e+07	2.73898e+07	3.657e+07	3.99301e+07	3.381e+07	3.13073e+07
A0A452ET01	Proteasome subunit beta	PSMB7	Proteasome subunit beta OS=Capra hircus OX=9925 GN=PSMB7 PE=3 SV=1	23.956	15	4	30	4	277	29.9	7.3	91.86	4	0	1	6.0923e+07	6.20406e+07	6.81336e+07	6.61805e+07	6.39739e+07	6.35523e+07	7.57127e+07	7.38235e+07
A0A452E359	Chromosome 19 C17orf98 homolog	C17orf98	Chromosome 19 C17orf98 homolog OS=Capra hircus OX=9925 GN=C17orf98 PE=4 SV=1	23.877	38	6	24	6	154	17.9	10.3	56.04	6	0	1	6.81088e+07	6.62817e+07	7.32191e+07	6.33615e+07	7.15097e+07	6.94538e+07	7.1483e+07	7.28484e+07
A0A452FAC3	WD repeat domain 93	WDR93	WD repeat domain 93 OS=Capra hircus OX=9925 GN=WDR93 PE=4 SV=1	23.859	11	8	15	8	694	78.2	7.55	34.6	8	0	1	5.19002e+07	5.45417e+07	5.16754e+07	4.86155e+07	5.01577e+07	5.61613e+07	5.24097e+07	5.26572e+07
A0A452F7J3	Phosphate cytidylyltransferase 1, choline, alpha	PCYT1A	Phosphate cytidylyltransferase 1, choline, alpha OS=Capra hircus OX=9925 GN=PCYT1A PE=3 SV=1	23.779	16	6	12	6	406	46.2	8.48	35.24	6	0	1	3.50868e+07	4.29938e+07	3.77966e+07	3.21995e+07	3.67223e+07	3.58091e+07	3.95181e+07	3.84114e+07
A0A452FSD2	Proteasome subunit beta	PSMB6	Proteasome subunit beta OS=Capra hircus OX=9925 GN=PSMB6 PE=3 SV=1	23.762	20	5	22	5	239	25.6	4.92	66.32	5	0	1	6.91648e+07	6.98621e+07	7.02343e+07	7.06891e+07	6.13692e+07	7.27245e+07	7.59877e+07	8.0215e+07
A0A452FTJ0	Calreticulin	CALR	Calreticulin OS=Capra hircus OX=9925 GN=CALR PE=3 SV=1	23.671	24	7	14	7	417	48	4.45	52.63	7	0	1	2.67126e+07	2.66695e+07	2.47737e+07	2.62353e+07	2.74136e+07	2.5926e+07	2.53877e+07	2.33394e+07
A0A452ET46	AFG1 like ATPase	AFG1L	AFG1 like ATPase OS=Capra hircus OX=9925 GN=AFG1L PE=3 SV=1	23.632	15	7	18	7	480	54.8	7.4	46.39	7	0	1	5.36558e+07	5.9526e+07	5.8445e+07	5.48617e+07	5.65193e+07	5.39732e+07	5.80645e+07	5.98045e+07
A0A452F4P0	Testis specific serine kinase substrate	TSKS	Testis specific serine kinase substrate OS=Capra hircus OX=9925 GN=TSKS PE=4 SV=1	23.567	16	8	13	8	586	63.4	6.37	39.34	8	0	1	2.68374e+07	2.87144e+07	3.02516e+07	2.63444e+07	2.40302e+07	2.73191e+07	3.06741e+07	2.68887e+07
A0A452EXW8	Diadenosine tetraphosphate synthetase	GARS1	Diadenosine tetraphosphate synthetase OS=Capra hircus OX=9925 GN=GARS1 PE=3 SV=1	23.529	8	7	9	7	836	93.6	8.88	26.21	7	0	1	1.97269e+07	2.01082e+07	2.00302e+07	1.76321e+07	2.0048e+07	2.0271e+07	1.97944e+07	2.02839e+07
A0A452FKN2	Tetratricopeptide repeat domain 16	TTC16	Tetratricopeptide repeat domain 16 OS=Capra hircus OX=9925 GN=TTC16 PE=4 SV=1	23.494	7	7	12	7	970	109.6	9.13	32.03	7	0	1	3.5575e+07	2.7059e+07	3.52774e+07	2.31951e+07	2.93873e+07	3.35202e+07	3.64024e+07	3.61253e+07
A0A452EVH8	26S proteasome AAA-ATPase subunit RPT3	PSMC4	26S proteasome AAA-ATPase subunit RPT3 OS=Capra hircus OX=9925 GN=PSMC4 PE=3 SV=1	23.332	14	7	13	6	418	47.3	5.21	37.4	7	0	1	2.13603e+07	2.04869e+07	2.15286e+07	2.21757e+07	2.01413e+07	2.05953e+07	2.25328e+07	2.44236e+07
A0A452FJE2	Thioredoxin like 1	TXNL1	Thioredoxin like 1 OS=Capra hircus OX=9925 GN=TXNL1 PE=4 SV=1	23.322	16	4	16	4	292	32.7	5.07	48.03	4	0	1	2.06111e+07	2.00281e+07	2.01352e+07	1.79282e+07	2.07328e+07	2.03626e+07	2.0322e+07	1.93471e+07
A0A452FRH9	Inositol-3-phosphate synthase 1	ISYNA1	Inositol-3-phosphate synthase 1 OS=Capra hircus OX=9925 GN=ISYNA1 PE=3 SV=1	23.257	12	7	21	7	557	60.7	6	60.24	7	0	1	7.61749e+07	7.56196e+07	8.13094e+07	7.66186e+07	7.81567e+07	8.25164e+07	8.61972e+07	8.8026e+07
A0A452FKG7	Guided entry of tail-anchored proteins factor 4	GET4	Guided entry of tail-anchored proteins factor 4 OS=Capra hircus OX=9925 GN=GET4 PE=3 SV=1	23.229	14	4	11	4	326	36.2	5.41	31.46	4	0	1	2.5575e+07	2.5296e+07	2.5804e+07	2.11702e+07	2.27062e+07	2.5951e+07	2.6571e+07	2.623e+07
A0A452F8V5	ADP ribosylation factor 3	ARF3	ADP ribosylation factor 3 OS=Capra hircus OX=9925 GN=ARF3 PE=3 SV=1	23.151	27	4	11	3	181	20.6	7.43	40.81	4	0	1	4.13775e+07	4.3637e+07	4.18619e+07	4.33921e+07	4.06589e+07	4.15504e+07	4.31832e+07	4.2417e+07
A0A452DKR1	Coiled-coil domain containing 178	CCDC178	Coiled-coil domain containing 178 OS=Capra hircus OX=9925 GN=CCDC178 PE=4 SV=1	23.111	9	6	8	6	705	84.2	7.58	20.11	6	0	1	1.20659e+07	1.30278e+07	1.18518e+07	1.24876e+07	1.22205e+07	1.25797e+07	1.20429e+07	1.22977e+07
A0A452G6T9	26S proteasome regulatory subunit RPN11	PSMD14	26S proteasome regulatory subunit RPN11 OS=Capra hircus OX=9925 GN=PSMD14 PE=4 SV=1	23.055	21	8	15	8	310	34.4	6.27	39.07	8	0	1	6.6192e+07	6.49734e+07	6.97635e+07	6.91872e+07	6.95392e+07	6.31877e+07	7.62448e+07	8.06399e+07
A0A452FQI2	Chromosome 11 C2orf73 homolog	C2orf73	Chromosome 11 C2orf73 homolog OS=Capra hircus OX=9925 GN=C2orf73 PE=4 SV=1	23.051	27	7	14	7	290	32.9	9.38	43.73	7	0	1	4.30363e+07	4.54555e+07	4.43921e+07	4.18288e+07	4.5192e+07	4.56421e+07	4.45167e+07	4.50029e+07
A0A452G830	15-oxoprostaglandin 13-reductase	PTGR1	15-oxoprostaglandin 13-reductase OS=Capra hircus OX=9925 GN=PTGR1 PE=3 SV=1	23.05	17	4	8	4	329	35.7	7.81	23.09	4	0	1	1.97023e+07	1.96957e+07	1.8747e+07	1.5474e+07	2.00534e+07	2.07057e+07	1.94186e+07	1.92535e+07
A0A452EER2	Histone H2B	LOC102171395	Histone H2B OS=Capra hircus OX=9925 GN=LOC102171395 PE=3 SV=1	23.049	29	4	14	4	126	13.9	10.32	36.34	4	0	1	7.00679e+07	7.36112e+07	6.27679e+07	1.00323e+08	7.39819e+07	8.36947e+07	6.37671e+07	6.62655e+07
A0A452GAX8	Nicastrin	NCSTN	Nicastrin OS=Capra hircus OX=9925 GN=NCSTN PE=3 SV=1	23.039	12	7	11	7	709	78.2	5.68	26.37	7	0	1	4.39754e+07	4.35298e+07	4.3303e+07	4.16156e+07	4.44238e+07	4.70596e+07	4.3285e+07	4.33563e+07
A0A452DS03	ADP-ribosylation factor 4	LOC108633910	ADP-ribosylation factor 4 OS=Capra hircus OX=9925 GN=LOC108633910 PE=3 SV=1	23.024	24	4	8	3	180	20.5	6.19	25.84	4	1	1	1.55834e+07	1.72304e+07	1.56667e+07	1.47732e+07	1.58169e+07	1.6215e+07	1.46776e+07	1.55047e+07
A0A452FLW2	Phosphomannomutase	PMM2	Phosphomannomutase OS=Capra hircus OX=9925 GN=PMM2 PE=3 SV=1	22.983	28	6	10	6	244	27.9	6.25	31.56	6	0	1	2.83181e+07	2.89041e+07	2.77716e+07	2.4365e+07	2.93738e+07	2.90501e+07	3.01114e+07	2.89662e+07
A0A452G0W3	Palmitoyl-protein hydrolase 1	PPT1	Palmitoyl-protein hydrolase 1 OS=Capra hircus OX=9925 GN=PPT1 PE=3 SV=1	22.971	12	3	8	3	306	34.1	6.52	26.98	3	0	1	2.2898e+07	1.84266e+07	1.94359e+07	1.90963e+07	1.85526e+07	1.95718e+07	1.90284e+07	1.96618e+07
A0A452ED88	Cytochrome b5 domain-containing protein 1	CYB5D1	Cytochrome b5 domain-containing protein 1 OS=Capra hircus OX=9925 GN=CYB5D1 PE=4 SV=1	22.95	27	4	4	4	228	26.7	5.8	17.55	4	0	1	2.94097e+07	3.04334e+07	2.72697e+07	3.37305e+07	7.69571e+06	2.62154e+07	2.91711e+07	3.13313e+07
A0A452ERM2	Alanine--tRNA ligase	AARS	Alanine--tRNA ligase OS=Capra hircus OX=9925 GN=AARS PE=3 SV=1	22.931	6	5	6	5	930	102.5	5.44	20.7	5	0	1	9.59698e+06	9.7862e+06	9.09782e+06	1.10608e+07	1.02513e+07	1.08292e+07	9.16507e+06	9.38335e+06
A0A452F4Z9	RAB11 binding and LisH domain, coiled-coil and HEAT repeat containing	RELCH	RAB11 binding and LisH domain, coiled-coil and HEAT repeat containing OS=Capra hircus OX=9925 GN=RELCH PE=4 SV=1	22.76	7	7	13	7	1180	130.2	5.22	34.45	7	0	1	1.77076e+07	1.83565e+07	2.07709e+07	1.57926e+07	1.32694e+07	1.65532e+07	1.6551e+07	1.74232e+07
A0A452FNM4	Heterogeneous nuclear ribonucleoproteins A2/B1	HNRNPA2B1	Heterogeneous nuclear ribonucleoproteins A2/B1 OS=Capra hircus OX=9925 GN=HNRNPA2B1 PE=4 SV=1	22.609	22	7	9	6	341	36	8.65	23.21	7	1	1	2.48893e+07	2.63947e+07	2.05339e+07	2.60034e+07	2.55309e+07	2.55418e+07	2.12788e+07	2.00539e+07
A0A452EM50	PPM-type phosphatase domain-containing protein		PPM-type phosphatase domain-containing protein OS=Capra hircus OX=9925 PE=3 SV=1	22.544	14	4	9	1	365	41.4	5.44	34.67	4	0	1	5.45663e+06	8.34635e+06	5.29309e+06	5.85517e+06	5.76269e+06	5.80499e+06	4.90714e+06	4.87248e+06
A0A452G9N1	Probable low-specificity L-threonine aldolase 2	LOC102179594	Probable low-specificity L-threonine aldolase 2 OS=Capra hircus OX=9925 GN=LOC102179594 PE=3 SV=1	22.527	18	6	11	6	400	43.5	7.58	32.07	6	0	1	2.11656e+07	2.29006e+07	2.18988e+07	2.08101e+07	2.28994e+07	2.22615e+07	2.21531e+07	2.27006e+07
A0A452FXH3	26S proteasome non-ATPase regulatory subunit 6	PSMD6	26S proteasome non-ATPase regulatory subunit 6 OS=Capra hircus OX=9925 GN=PSMD6 PE=3 SV=1	22.507	16	8	10	8	389	45.5	5.62	27.44	8	0	1	2.8977e+07	2.45533e+07	3.00996e+07	2.68812e+07	2.95788e+07	3.10033e+07	2.93899e+07	3.03164e+07
A0A452G6R1	Family with sequence similarity 71 member C	FAM71C	Family with sequence similarity 71 member C OS=Capra hircus OX=9925 GN=FAM71C PE=4 SV=1	22.489	8	3	52	1	217	24.7	10.02	173.49	3	0	1	5.98724e+06	6.08176e+06	6.25308e+06	5.14956e+06	5.57957e+06	6.3119e+06	6.34727e+06	6.30405e+06
A0A452F585	Serine/threonine-protein phosphatase 2A activator	PTPA	Serine/threonine-protein phosphatase 2A activator OS=Capra hircus OX=9925 GN=PTPA PE=3 SV=1	22.485	21	7	16	7	317	36.2	6.29	48.02	7	0	1	3.64035e+07	3.66056e+07	3.62057e+07	5.01601e+07	3.91795e+07	3.86566e+07	3.81272e+07	4.02689e+07
A0A452FZR8	HIV-1 Tat interactive protein 2	HTATIP2	HIV-1 Tat interactive protein 2 OS=Capra hircus OX=9925 GN=HTATIP2 PE=4 SV=1	22.483	20	5	13	5	242	27.1	8.37	34.85	5	0	1	2.21988e+07	2.46609e+07	2.26541e+07	3.72671e+07	2.31955e+07	2.86934e+07	2.3198e+07	2.34145e+07
A0A452F0S5	Complement component C8 gamma chain	LOC102183974	Complement component C8 gamma chain OS=Capra hircus OX=9925 GN=LOC102183974 PE=3 SV=1	22.453	11	2	7	2	218	23.6	9.73	25.31	2	0	1	1.34654e+07	1.40859e+07	1.32767e+07	1.15744e+07	1.45239e+07	1.4677e+07	1.44571e+07	1.45276e+07
A0A452EH17	Transmembrane protein 177	TMEM177	Transmembrane protein 177 OS=Capra hircus OX=9925 GN=TMEM177 PE=3 SV=1	22.347	24	7	17	7	311	33.6	9.77	50.24	7	0	1	6.10083e+07	6.15098e+07	6.41856e+07	5.15893e+07	6.40017e+07	6.27406e+07	6.63313e+07	6.33218e+07
A0A452FN31	X-ray radiation resistance associated 1	XRRA1	X-ray radiation resistance associated 1 OS=Capra hircus OX=9925 GN=XRRA1 PE=4 SV=1	22.346	7	5	6	5	794	89.3	9.66	21.08	5	0	1	1.73009e+07	1.84124e+07	1.70158e+07	1.73993e+07	1.7699e+07	1.78919e+07	1.69569e+07	1.67322e+07
A0A452E7P5	Protein XRP2	RP2	Protein XRP2 OS=Capra hircus OX=9925 GN=RP2 PE=3 SV=1	22.298	13	6	16	6	350	39.5	5.33	49.76	6	0	1	1.07959e+08	1.06319e+08	1.11011e+08	9.39616e+07	1.14432e+08	1.13836e+08	1.14764e+08	1.11001e+08
A0A452E7M7	Immunoglobulin binding protein 1	IGBP1	Immunoglobulin binding protein 1 OS=Capra hircus OX=9925 GN=IGBP1 PE=4 SV=1	22.237	18	6	14	6	338	39	5.63	45.36	6	0	1	4.98621e+07	6.33432e+07	5.09888e+07	4.60647e+07	5.11493e+07	4.63292e+07	5.35274e+07	5.22195e+07
A0A452F2T5	Thioredoxin 2	TXN2	Thioredoxin 2 OS=Capra hircus OX=9925 GN=TXN2 PE=4 SV=1	22.237	13	3	8	3	166	18.4	8.28	27.72	3	0	1	1.10844e+08	1.16139e+08	1.11825e+08	1.24715e+08	8.50877e+07	9.79848e+07	1.09216e+08	1.14175e+08
A0A452FQI7	ATP binding cassette subfamily C member 12	ABCC12	ATP binding cassette subfamily C member 12 OS=Capra hircus OX=9925 GN=ABCC12 PE=4 SV=1	22.189	5	7	14	7	1311	146.3	8.1	25.31	7	0	1	4.91551e+07	4.38444e+07	4.47669e+07	3.74756e+07	4.67823e+07	4.84622e+07	4.9396e+07	4.1621e+07
A0A059U2L0	Beta-defensin	DEFB126	Beta-defensin OS=Capra hircus OX=9925 GN=DEFB126 PE=2 SV=1	22.133	12	1	35	1	93	9.7	8.6	60.92	1	0	1	3.56718e+08	3.18339e+08	3.50316e+08	3.64099e+08	3.81412e+08	3.4497e+08	3.66347e+08	3.60331e+08
A0A452DWU1	Histone H4	LOC108636047	Histone H4 OS=Capra hircus OX=9925 GN=LOC108636047 PE=3 SV=1	22.128	50	5	12	5	103	11.4	11.36	35.94	5	0	1	3.98444e+07	4.59762e+07	3.93492e+07	8.44526e+07	4.1421e+07	4.82323e+07	3.96762e+07	3.94401e+07
A0A452EG13	Glucosidase 2 subunit beta	PRKCSH	Glucosidase 2 subunit beta OS=Capra hircus OX=9925 GN=PRKCSH PE=4 SV=1	22.124	13	6	11	6	503	56.9	4.48	31.98	6	0	1	3.36316e+07	3.31069e+07	3.19856e+07	2.86246e+07	3.37169e+07	3.18715e+07	3.2241e+07	3.21824e+07
A0A452DUD6	Matrix AAA peptidase interacting protein 1	MAIP1	Matrix AAA peptidase interacting protein 1 OS=Capra hircus OX=9925 GN=MAIP1 PE=4 SV=1	22.101	15	4	11	4	291	32.9	9.09	33.7	4	0	1	3.64967e+07	4.94416e+07	3.97212e+07	5.04203e+07	4.29113e+07	3.64437e+07	3.95622e+07	4.28862e+07
A0A452E6F1	Chromosome 16 C1orf158 homolog	C1orf158	Chromosome 16 C1orf158 homolog OS=Capra hircus OX=9925 GN=C1orf158 PE=4 SV=1	21.993	33	7	19	7	196	23.3	9.82	58.88	7	0	1	5.72505e+07	6.24464e+07	6.15158e+07	6.69602e+07	6.32695e+07	5.4563e+07	5.91503e+07	6.45061e+07
A0A452FTF8	Cyclic nucleotide binding domain containing 2	CNBD2	Cyclic nucleotide binding domain containing 2 OS=Capra hircus OX=9925 GN=CNBD2 PE=4 SV=1	21.939	8	5	8	5	583	68.4	9.39	22.62	5	0	1	5.31257e+07	5.01718e+07	4.89622e+07	4.1042e+07	5.15376e+07	5.39613e+07	5.22736e+07	4.9255e+07
A0A452EJ76	S-phase kinase-associated protein 1		S-phase kinase-associated protein 1 OS=Capra hircus OX=9925 PE=3 SV=1	21.919	21	3	8	3	163	18.7	4.54	28.93	3	0	1	1.7437e+07	1.77542e+07	1.75592e+07	2.12477e+07	1.9326e+07	1.68438e+07	1.75276e+07	1.76895e+07
A0A452F543	Ankyrin repeat domain 42	ANKRD42	Ankyrin repeat domain 42 OS=Capra hircus OX=9925 GN=ANKRD42 PE=4 SV=1	21.915	14	9	16	9	572	63.5	6.64	42.85	9	0	1	3.73929e+07	4.3637e+07	3.90754e+07	3.68554e+07	3.88858e+07	4.31085e+07	3.83015e+07	3.93014e+07
A0A452G102	Polynucleotide phosphorylase 1	PNPT1	Polynucleotide phosphorylase 1 OS=Capra hircus OX=9925 GN=PNPT1 PE=3 SV=1	21.891	8	6	9	6	752	82.2	8.32	23.68	6	0	1	4.04357e+07	4.41261e+07	4.24686e+07	3.98799e+07	4.16372e+07	4.33886e+07	4.21881e+07	4.21422e+07
A0A452G1E3	AP-2 complex subunit alpha	AP2A1	AP-2 complex subunit alpha OS=Capra hircus OX=9925 GN=AP2A1 PE=3 SV=1	21.881	6	5	7	5	985	108.6	7.77	20.32	5	0	1	2.06992e+07	1.98275e+07	2.05409e+07	1.77673e+07	2.14368e+07	2.24593e+07	2.12008e+07	2.08935e+07
A0A452E2V7	Transmembrane protein 65	TMEM65	Transmembrane protein 65 OS=Capra hircus OX=9925 GN=TMEM65 PE=4 SV=1	21.85	19	4	10	4	253	27.3	8.66	26.13	4	0	1	8.11314e+07	7.4145e+07	7.99289e+07	5.65419e+07	7.67276e+07	8.63414e+07	8.59751e+07	7.29535e+07
A0A452EML6	Keratin, type II cytoskeletal 75	KRT75	Keratin, type II cytoskeletal 75 OS=Capra hircus OX=9925 GN=KRT75 PE=3 SV=1	21.845	8	5	14	1	529	57.7	7.8	43.15	5	0	1	2.40477e+06	2.13523e+06	2.33365e+06	2.00411e+06	2.40744e+06	2.55742e+06	4.28949e+06	1.89487e+06
A0A452EWE8	Calcium-activated neutral proteinase small subunit	CAPNS1	Calcium-activated neutral proteinase small subunit OS=Capra hircus OX=9925 GN=CAPNS1 PE=4 SV=1	21.811	22	4	13	4	203	23.3	5	42.03	4	0	1	3.51502e+07	3.65604e+07	3.55255e+07	3.04805e+07	3.50452e+07	3.35654e+07	3.61815e+07	3.57323e+07
A0A452EM01		LOC102176107	Uncharacterized protein OS=Capra hircus OX=9925 GN=LOC102176107 PE=4 SV=1	21.798	18	7	21	7	361	40.7	9.64	53.62	7	0	1	7.99013e+07	6.63062e+07	6.62635e+07	5.32861e+07	7.43279e+07	6.63358e+07	8.72669e+07	5.97919e+07
A0A452DYK8	Thioredoxin-disulfide reductase	TXNRD3	Thioredoxin-disulfide reductase OS=Capra hircus OX=9925 GN=TXNRD3 PE=3 SV=1	21.794	6	5	7	5	649	70.3	8.19	16.55	5	0	1	3.33487e+07	3.24882e+07	3.14158e+07	2.48962e+07	2.91867e+07	3.36595e+07	3.229e+07	2.98548e+07
A0A452FJ56	Neuroplastin	NPTN	Neuroplastin OS=Capra hircus OX=9925 GN=NPTN PE=4 SV=1	21.703	10	3	15	3	361	40.9	7.43	50	3	0	1	5.11851e+07	5.04355e+07	5.01382e+07	4.61207e+07	4.99245e+07	4.90324e+07	5.08912e+07	5.00753e+07
G1DG34	Erlin-1	ERLIN1	Erlin-1 OS=Capra hircus OX=9925 GN=ERLIN1 PE=2 SV=1	21.679	9	3	10	1	346	38.9	7.81	34.9	3	0	1	6.59493e+06	7.15599e+06	6.69561e+06	7.34857e+06	6.65569e+06	7.04791e+06	6.52511e+06	6.94979e+06
A0A452FIK7	LIM domain containing preferred translocation partner in lipoma	LPP	LIM domain containing preferred translocation partner in lipoma OS=Capra hircus OX=9925 GN=LPP PE=4 SV=1	21.526	9	4	9	4	614	65.6	7.47	28.55	4	0	1	3.46087e+07	3.12149e+07	3.08769e+07	2.41534e+07	3.23989e+07	2.92502e+07	3.44103e+07	2.76313e+07
A0A452DK08	IQ motif and ankyrin repeat containing 1	IQANK1	IQ motif and ankyrin repeat containing 1 OS=Capra hircus OX=9925 GN=IQANK1 PE=4 SV=1	21.426	14	8	13	8	570	63.5	6.02	36.95	8	0	1	1.69542e+07	1.74967e+07	1.72314e+07	1.77739e+07	1.8011e+07	1.81073e+07	1.69866e+07	1.80325e+07
A0A452G6L4	Centrosomal protein of 44 kDa	CEP44	Centrosomal protein of 44 kDa OS=Capra hircus OX=9925 GN=CEP44 PE=4 SV=1	21.391	13	6	18	6	414	46.5	6.02	41.26	6	0	1	5.49549e+07	4.9853e+07	5.4481e+07	4.30419e+07	5.59463e+07	6.10159e+07	5.86772e+07	5.11788e+07
A0A452DLG8	14 kDa phosphohistidine phosphatase	PHPT1	14 kDa phosphohistidine phosphatase OS=Capra hircus OX=9925 GN=PHPT1 PE=3 SV=1	21.324	40	5	20	5	125	13.9	5.82	52.69	5	0	1	5.32256e+07	5.3339e+07	5.48895e+07	5.35971e+07	5.79456e+07	5.39326e+07	5.48119e+07	5.38908e+07
A0A452G724	Rab GDP dissociation inhibitor	GDI2	Rab GDP dissociation inhibitor OS=Capra hircus OX=9925 GN=GDI2 PE=3 SV=1	21.224	19	7	11	5	436	49.5	7.55	24.17	7	2	1	1.92339e+08	2.05888e+08	2.15499e+08	2.03082e+08	1.93129e+08	2.10309e+08	2.22316e+08	2.33128e+08
A0A452G3H7	Uricase	LOC102168228	Uricase OS=Capra hircus OX=9925 GN=LOC102168228 PE=3 SV=1	21.13	18	5	12	5	300	34.5	7.91	31.59	5	0	1	2.21348e+07	2.33738e+07	2.25266e+07	6.0339e+07	1.43583e+07	2.94135e+07	2.20693e+07	2.27415e+07
A0A452FVR0	Family with sequence similarity 185 member A	FAM185A	Family with sequence similarity 185 member A OS=Capra hircus OX=9925 GN=FAM185A PE=4 SV=1	21.095	11	3	11	3	371	40.1	6.46	27.94	3	0	1	8.85366e+07	8.88745e+07	8.68861e+07	7.42767e+07	8.43361e+07	8.26377e+07	8.39972e+07	8.18493e+07
A0A452DQJ7	T-complex-associated-testis-expressed 3	DYNLT2	T-complex-associated-testis-expressed 3 OS=Capra hircus OX=9925 GN=DYNLT2 PE=3 SV=1	21.043	21	4	14	4	194	22.6	9	40.17	4	0	1	3.54743e+07	4.84721e+07	3.37948e+07	3.96577e+07	3.91253e+07	4.24708e+07	3.55612e+07	3.68798e+07
A0A452E613	Transaldolase	TALDO1	Transaldolase OS=Capra hircus OX=9925 GN=TALDO1 PE=3 SV=1	21.032	21	7	10	7	283	31.7	8.19	25.96	7	0	1	2.59484e+07	2.57596e+07	2.50428e+07	2.36739e+07	2.59321e+07	2.6017e+07	2.57852e+07	2.56876e+07
A0A452FHJ1	Complex I-B14.7	NDUFA11	Complex I-B14.7 OS=Capra hircus OX=9925 GN=NDUFA11 PE=3 SV=1	21.001	42	4	11	4	141	14.7	8.72	36.55	4	0	1	6.92508e+07	6.19974e+07	6.8669e+07	5.553e+07	5.73069e+07	5.8811e+07	6.91785e+07	6.93966e+07
A0A452E630	Phospholipid scramblase	LOC102175808	Phospholipid scramblase OS=Capra hircus OX=9925 GN=LOC102175808 PE=3 SV=1	20.989	14	3	13	3	236	27.5	6.93	34.05	3	0	1	3.40853e+07	3.74346e+07	3.22879e+07	2.95185e+07	3.65864e+07	4.48976e+07	3.22655e+07	3.02035e+07
A0A452G0E7	RAN guanine nucleotide release factor	RANGRF	RAN guanine nucleotide release factor OS=Capra hircus OX=9925 GN=RANGRF PE=3 SV=1	20.979	20	3	7	3	186	20.7	4.63	28.46	3	0	1	4.10248e+07	3.90556e+07	3.95237e+07	3.62527e+07	4.02682e+07	3.9154e+07	3.97805e+07	3.77486e+07
A0A452E984			Uncharacterized protein OS=Capra hircus OX=9925 PE=4 SV=1	20.865	24	3	38	1	123	14.6	8.29	112.61	3	0	1	2.67182e+07	2.87702e+07	2.78346e+07	4.24296e+07	2.64978e+07	2.47087e+07	2.4827e+07	2.44474e+07
A0A452FP27	Kazal-like domain-containing protein		Kazal-like domain-containing protein OS=Capra hircus OX=9925 PE=4 SV=1	20.847	27	1	4	1	81	9.1	7.69	20.66	1	0	1	4.4325e+06	3.52213e+06	2.81198e+06	4.45787e+06	3.55328e+06	3.13064e+06	2.82286e+06	2.37248e+06
A0A452ELH1	Testis expressed 29	TEX29	Testis expressed 29 OS=Capra hircus OX=9925 GN=TEX29 PE=4 SV=1	20.829	14	3	24	3	147	16.3	4.83	91.76	3	0	1	8.19706e+07	8.08828e+07	7.57974e+07	7.52386e+07	7.92816e+07	7.09961e+07	7.39605e+07	7.41413e+07
A0A452E6N5	Motile sperm domain containing 2	MOSPD2	Motile sperm domain containing 2 OS=Capra hircus OX=9925 GN=MOSPD2 PE=4 SV=1	20.769	10	6	8	6	524	60.2	6.44	22.26	6	0	1	1.64445e+07	1.71288e+07	1.59745e+07	1.83073e+07	1.80086e+07	1.73022e+07	1.73781e+07	1.55867e+07
A0A452FBC6	Testis expressed 43	TEX43	Testis expressed 43 OS=Capra hircus OX=9925 GN=TEX43 PE=4 SV=1	20.745	32	3	11	3	134	15.2	8.85	30.58	3	0	1	3.62341e+07	4.06743e+07	3.91346e+07	3.9082e+07	4.08016e+07	3.71273e+07	4.05088e+07	4.17578e+07
A0A452EVH3	Putative homeodomain transcription factor 1	PHTF1	Putative homeodomain transcription factor 1 OS=Capra hircus OX=9925 GN=PHTF1 PE=4 SV=1	20.652	9	5	9	5	729	82.5	9.38	24.26	5	0	1	2.53413e+07	2.66478e+07	2.42286e+07	2.16228e+07	2.46131e+07	3.14992e+07	3.3532e+07	2.38189e+07
A0A452F3T0	SH3 domain-containing protein		SH3 domain-containing protein OS=Capra hircus OX=9925 PE=4 SV=1	20.598	14	7	8	7	482	53.1	6.99	25.83	7	0	1	1.21448e+07	1.21782e+07	1.18042e+07	1.05936e+07	1.25409e+07	1.25866e+07	1.19713e+07	1.20086e+07
A0A452DKF9	4HBT domain-containing protein		4HBT domain-containing protein OS=Capra hircus OX=9925 PE=3 SV=1	20.563	26	3	12	1	129	13.8	7.55	43.74	3	0	1	8.20351e+06	1.10395e+07	8.53126e+06	1.00765e+07	8.77138e+06	7.94787e+06	9.34481e+06	1.00958e+07
A0A452FK68	Uncharacterized LOC102179561	LOC102179561	Uncharacterized LOC102179561 OS=Capra hircus OX=9925 GN=LOC102179561 PE=4 SV=1	20.562	17	3	35	3	144	16.1	8.38	93.47	3	0	1	1.46432e+08	1.58977e+08	1.42306e+08	1.30172e+08	1.54966e+08	1.32168e+08	1.4963e+08	1.45425e+08
A0A452DZE9	Lysophospholipase 1	LYPLA1	Lysophospholipase 1 OS=Capra hircus OX=9925 GN=LYPLA1 PE=3 SV=1	20.543	18	4	24	4	220	23.6	6.77	62.5	4	0	1	7.63296e+07	7.59443e+07	8.04468e+07	8.35175e+07	9.15287e+07	7.73763e+07	8.1474e+07	8.97463e+07
A0A452E1K8	DPY30 domain containing 1	DYDC1	DPY30 domain containing 1 OS=Capra hircus OX=9925 GN=DYDC1 PE=3 SV=1	20.525	31	6	10	6	176	20.8	4.53	28.47	6	0	1	3.62595e+07	3.45131e+07	3.44328e+07	3.67073e+07	3.38757e+07	3.41313e+07	3.09799e+07	3.20913e+07
A0A452FRB8	Ankyrin repeat domain 45	ANKRD45	Ankyrin repeat domain 45 OS=Capra hircus OX=9925 GN=ANKRD45 PE=4 SV=1	20.456	12	3	9	3	254	28.8	4.83	25.3	3	0	1	3.06818e+07	3.05042e+07	2.95213e+07	3.08858e+07	2.98291e+07	2.82226e+07	2.95096e+07	2.96297e+07
A0A452ELZ3	Aflatoxin B1 aldehyde reductase member 2	LOC102170282	Aflatoxin B1 aldehyde reductase member 2 OS=Capra hircus OX=9925 GN=LOC102170282 PE=4 SV=1	20.375	19	5	15	2	299	32.9	9.36	38.24	5	3	1	3.23868e+07	3.32698e+07	3.35118e+07	3.13565e+07	3.48669e+07	3.56743e+07	3.42022e+07	3.4037e+07
A0A452DRP2	Peptidylprolyl isomerase		Peptidylprolyl isomerase OS=Capra hircus OX=9925 PE=4 SV=1	20.358	8	1	12	1	172	19.5	8.97	30.69	1	0	1	1.25422e+07	1.31183e+07	1.24565e+07	1.14483e+07	1.31025e+07	1.30027e+07	1.25027e+07	1.20781e+07
A0A452F935	2-phospho-D-glycerate hydro-lyase	ENO4	2-phospho-D-glycerate hydro-lyase OS=Capra hircus OX=9925 GN=ENO4 PE=3 SV=1	20.341	12	7	12	7	613	67.6	5.33	38.86	7	0	1	5.70667e+07	5.88205e+07	5.94527e+07	5.33885e+07	5.91198e+07	6.03142e+07	6.11489e+07	6.17819e+07
A0A452EVP7	Nuclear pore complex protein Nup96	NUP98	Nuclear pore complex protein Nup96 OS=Capra hircus OX=9925 GN=NUP98 PE=4 SV=1	20.326	3	6	13	6	1752	191.3	6	31.78	6	0	1	4.85915e+07	5.49189e+07	4.86557e+07	4.62938e+07	4.46464e+07	4.88504e+07	4.64217e+07	4.93119e+07
A0A452EPI0	Sad1 and UNC84 domain containing 5	SUN5	Sad1 and UNC84 domain containing 5 OS=Capra hircus OX=9925 GN=SUN5 PE=4 SV=1	20.323	13	4	10	4	380	43.5	8.5	30.25	4	0	1	6.20049e+07	5.89869e+07	5.87318e+07	5.31395e+07	6.17551e+07	6.51695e+07	6.17673e+07	5.84097e+07
A0A452ETZ4	SH3 domain containing GRB2 like 3, endophilin A3	SH3GL3	SH3 domain containing GRB2 like 3, endophilin A3 OS=Capra hircus OX=9925 GN=SH3GL3 PE=3 SV=1	20.258	19	7	13	7	347	39	5.47	25.7	7	0	1	4.95412e+07	4.90538e+07	4.8321e+07	4.06392e+07	4.85863e+07	4.70128e+07	4.82944e+07	4.65295e+07
A0A452EWS3	Carboxypeptidase A5	CPA5	Carboxypeptidase A5 OS=Capra hircus OX=9925 GN=CPA5 PE=3 SV=1	20.244	12	7	25	7	456	51.5	7.25	54.66	7	0	1	1.38003e+08	1.4354e+08	1.34778e+08	1.48453e+08	1.35427e+08	1.37369e+08	1.40782e+08	1.37743e+08
A0A452FK47	Acylphosphatase	ACYP1	Acylphosphatase OS=Capra hircus OX=9925 GN=ACYP1 PE=3 SV=1	20.207	45	5	13	5	101	11.5	8.97	39.4	5	0	1	8.41098e+07	8.88286e+07	8.61105e+07	7.67732e+07	8.48668e+07	7.63376e+07	8.47044e+07	8.45271e+07
A0A452GAQ6	SET nuclear proto-oncogene	SET	SET nuclear proto-oncogene OS=Capra hircus OX=9925 GN=SET PE=3 SV=1	20.09	12	3	9	3	290	33.6	4.44	28.54	3	0	1	1.87843e+07	1.90821e+07	1.74881e+07	1.63194e+07	1.77497e+07	1.69277e+07	1.64935e+07	1.54198e+07
A0A452EWE6	Rh family C glycoprotein	RHCG	Rh family C glycoprotein OS=Capra hircus OX=9925 GN=RHCG PE=3 SV=1	20.08	7	3	20	3	460	51	6	56.58	3	0	1	9.53219e+07	9.40697e+07	9.581e+07	8.5953e+07	9.30542e+07	8.62628e+07	9.38402e+07	9.60567e+07
A0A452FGX2	Midkine	MDK	Midkine OS=Capra hircus OX=9925 GN=MDK PE=3 SV=1	20.057	29	4	12	4	143	15.7	9.79	45.57	4	0	1	1.33054e+07	1.45408e+07	1.65048e+07	2.51296e+07	1.4328e+07	1.37643e+07	1.53045e+07	1.54894e+07
A0A452FW46	V-type proton ATPase subunit a	ATP6V0A1	V-type proton ATPase subunit a OS=Capra hircus OX=9925 GN=ATP6V0A1 PE=3 SV=1	20.009	6	4	6	3	839	96.4	6.86	21.82	4	0	1	3.85566e+06	5.32595e+06	3.72807e+06	3.93541e+06	4.20104e+06	4.20581e+06	3.74124e+06	3.74422e+06
A0A452DZ49	Kinetochore localized astrin (SPAG5) binding protein	KNSTRN	Kinetochore localized astrin (SPAG5) binding protein OS=Capra hircus OX=9925 GN=KNSTRN PE=4 SV=1	20.006	20	5	16	5	234	25.7	8.72	53.98	5	0	1	7.04333e+07	6.63118e+07	6.97751e+07	5.65246e+07	6.83571e+07	7.11024e+07	7.34033e+07	6.96121e+07
A0A452EXG2	SS nuclear autoantigen 1	SSNA1	SS nuclear autoantigen 1 OS=Capra hircus OX=9925 GN=SSNA1 PE=4 SV=1	19.957	34	4	8	4	119	13.6	5.68	25.41	4	0	1	1.56991e+07	1.64496e+07	1.65238e+07	1.28363e+07	1.7469e+07	1.53098e+07	1.58211e+07	1.51649e+07
A0A452EI14	Solute carrier family 25 member 22	SLC25A22	Solute carrier family 25 member 22 OS=Capra hircus OX=9925 GN=SLC25A22 PE=3 SV=1	19.9	15	5	19	5	315	33.5	9.52	57	5	0	1	8.04955e+07	8.0645e+07	8.69259e+07	8.19079e+07	8.83339e+07	8.53556e+07	8.67267e+07	9.23028e+07
A0A452FTU0	Metallo-beta-lactamase domain containing 2	MBLAC2	Metallo-beta-lactamase domain containing 2 OS=Capra hircus OX=9925 GN=MBLAC2 PE=4 SV=1	19.737	20	5	8	5	279	31.3	7.09	23.96	5	0	1	2.12079e+07	2.28824e+07	2.09438e+07	1.82686e+07	2.13566e+07	2.05677e+07	2.27965e+07	2.14974e+07
A0A452E4F6	Lysozyme like 6	LYZL6	Lysozyme like 6 OS=Capra hircus OX=9925 GN=LYZL6 PE=3 SV=1	19.711	7	2	30	2	148	16.6	5.2	74.73	2	0	1	7.11112e+08	6.91918e+08	7.38026e+08	6.81255e+08	7.10322e+08	6.62843e+08	7.11929e+08	7.0589e+08
A0A452EKS9	Ubiquitin thioesterase	OTUB1	Ubiquitin thioesterase OS=Capra hircus OX=9925 GN=OTUB1 PE=3 SV=1	19.71	17	3	6	3	271	31.3	5	19.52	3	0	1	1.88325e+07	1.84503e+07	1.9135e+07	1.42386e+07	1.99494e+07	1.92931e+07	1.80623e+07	1.75781e+07
A0A452FT46	Aldehyde dehydrogenase 2 family member	ALDH2	Aldehyde dehydrogenase 2 family member OS=Capra hircus OX=9925 GN=ALDH2 PE=3 SV=1	19.663	14	7	11	4	524	56.9	6.86	28.33	7	1	1	1.16642e+07	1.24557e+07	1.14382e+07	2.97144e+07	1.21557e+07	1.4643e+07	1.14356e+07	1.16396e+07
A0A452F1N7	Protein phosphatase 4 regulatory subunit 1	PPP4R1	Protein phosphatase 4 regulatory subunit 1 OS=Capra hircus OX=9925 GN=PPP4R1 PE=4 SV=1	19.649	7	5	6	5	917	102.1	4.83	15.71	5	0	1	1.10176e+07	1.22089e+07	1.13788e+07	1.07071e+07	1.01832e+07	1.14322e+07	1.1938e+07	1.27043e+07
A0A452FLZ3	Regulator of microtubule dynamics 2	RMDN2	Regulator of microtubule dynamics 2 OS=Capra hircus OX=9925 GN=RMDN2 PE=4 SV=1	19.64	10	3	8	3	408	46.6	7.21	24.98	3	0	1	6.8834e+06	7.51606e+06	6.72628e+06	6.63048e+06	6.95891e+06	7.35062e+06	6.63974e+06	6.7163e+06
A0A452EPB9	Elongin-C	ELOC	Elongin-C OS=Capra hircus OX=9925 GN=ELOC PE=3 SV=1	19.589	47	4	9	4	112	12.5	4.78	36.22	4	0	1	3.86866e+07	4.39609e+07	3.9364e+07	3.98509e+07	4.01453e+07	3.79345e+07	4.02171e+07	4.11219e+07
A0A452DRC7	Family with sequence similarity 47 member C	FAM47C	Family with sequence similarity 47 member C OS=Capra hircus OX=9925 GN=FAM47C PE=3 SV=1	19.515	13	5	14	5	421	48.7	9.19	31.8	5	0	1	2.24089e+07	2.80997e+07	2.28941e+07	2.28674e+07	2.39519e+07	2.31176e+07	2.17773e+07	2.37919e+07
A0A452FKR7	Disintegrin and metalloproteinase domain-containing protein 18-like	LOC102186109	Disintegrin and metalloproteinase domain-containing protein 18-like OS=Capra hircus OX=9925 GN=LOC102186109 PE=4 SV=1	19.508	5	4	13	3	723	81.2	6.89	32.13	4	0	1	5.71416e+07	5.37278e+07	5.08865e+07	6.91285e+07	6.43225e+07	4.77082e+07	5.47827e+07	5.81383e+07
A0A452F2U6	DnaJ heat shock protein family (Hsp40) member B6	DNAJB6	DnaJ heat shock protein family (Hsp40) member B6 OS=Capra hircus OX=9925 GN=DNAJB6 PE=4 SV=1	19.475	23	6	17	3	236	26	6.25	46.22	6	0	1	3.86263e+07	4.01926e+07	3.89955e+07	3.64758e+07	4.09792e+07	3.54877e+07	4.12357e+07	3.69486e+07
A0A452EVN7	Chromosome 26 C10orf120 homolog	C10orf120	Chromosome 26 C10orf120 homolog OS=Capra hircus OX=9925 GN=C10orf120 PE=4 SV=1	19.455	14	5	15	5	343	39.1	9.32	39.88	5	0	1	3.14391e+07	3.23907e+07	3.31515e+07	2.85516e+07	3.24128e+07	3.25413e+07	3.12117e+07	3.27981e+07
A0A452DYD6	Hydroxysteroid dehydrogenase like 1	HSDL1	Hydroxysteroid dehydrogenase like 1 OS=Capra hircus OX=9925 GN=HSDL1 PE=3 SV=1	19.348	14	5	10	5	330	37	8.6	21.39	5	0	1	3.54065e+07	3.74957e+07	3.71788e+07	3.00499e+07	3.61149e+07	3.26049e+07	3.59637e+07	3.61855e+07
I6U6S0	UMP-CMP kinase	CMPK1	UMP-CMP kinase OS=Capra hircus OX=9925 GN=CMPK1 PE=2 SV=1	19.316	18	4	7	4	228	25.9	8.5	23.97	4	0	1	1.39859e+07	1.49696e+07	1.39677e+07	1.4036e+07	1.49693e+07	1.5536e+07	1.395e+07	1.42596e+07
A0A452FG03	Annexin	ANXA1	Annexin OS=Capra hircus OX=9925 GN=ANXA1 PE=3 SV=1	19.302	14	5	7	5	346	38.9	6.81	20.33	5	0	1	2.10376e+07	1.96731e+07	1.92318e+07	1.65163e+07	2.10725e+07	2.22069e+07	2.08312e+07	1.81349e+07
A0A452F2P9	MYC binding protein	MYCBP	MYC binding protein OS=Capra hircus OX=9925 GN=MYCBP PE=3 SV=1	19.277	43	4	10	4	103	12	5.91	31.54	4	0	1	3.62137e+07	3.57547e+07	3.73823e+07	3.185e+07	3.36799e+07	3.84967e+07	3.74471e+07	3.60588e+07
A0A452ESA8	Protein tyrosine phosphatase mitochondrial 1	PTPMT1	Protein tyrosine phosphatase mitochondrial 1 OS=Capra hircus OX=9925 GN=PTPMT1 PE=3 SV=1	19.168	27	5	15	5	201	22.8	9.7	49	5	0	1	4.59438e+07	4.72384e+07	4.95197e+07	4.7314e+07	5.14549e+07	4.40994e+07	4.92412e+07	4.97326e+07
A0A452EVL5	V-type proton ATPase subunit H	ATP6V1H	V-type proton ATPase subunit H OS=Capra hircus OX=9925 GN=ATP6V1H PE=3 SV=1	19.161	11	5	12	5	474	54.5	7.9	33.32	5	0	1	7.00737e+07	7.20401e+07	7.50928e+07	6.64718e+07	7.5059e+07	7.43978e+07	7.86529e+07	7.81339e+07
A0A452EFQ6	N-acetylglucosamine-6-sulfatase	GNS	N-acetylglucosamine-6-sulfatase OS=Capra hircus OX=9925 GN=GNS PE=3 SV=1	19.139	7	4	8	4	559	62.6	8.34	19.68	4	0	1	2.84066e+07	2.84062e+07	2.79702e+07	2.59611e+07	2.84267e+07	2.9983e+07	2.84445e+07	2.95691e+07
A0A452F3K6	5',3'-nucleotidase, mitochondrial	NT5M	5',3'-nucleotidase, mitochondrial OS=Capra hircus OX=9925 GN=NT5M PE=4 SV=1	19.115	24	5	13	5	225	25.8	7.47	43.08	5	0	1	3.2644e+07	3.41222e+07	3.24072e+07	3.14513e+07	3.38625e+07	3.5047e+07	3.32781e+07	3.32491e+07
A0A452DPJ6	Myosin light chain, phosphorylatable, fast skeletal muscle	MYLPF	Myosin light chain, phosphorylatable, fast skeletal muscle OS=Capra hircus OX=9925 GN=MYLPF PE=4 SV=1	19.102	31	5	15	5	169	18.9	4.7	17.39	5	0	1	6.20152e+07	2.99384e+07	2.34548e+07	2.83258e+07	2.20924e+07	2.5226e+07	1.98419e+07	2.00227e+07
A0A452G0I1	Eukaryotic translation initiation factor 3 subunit C	LOC102182187	Eukaryotic translation initiation factor 3 subunit C OS=Capra hircus OX=9925 GN=LOC102182187 PE=3 SV=1	19.039	8	7	11	7	901	104	5.8	30.09	7	0	1	5.45235e+07	5.98414e+07	6.05927e+07	5.04227e+07	6.00723e+07	6.0149e+07	6.31911e+07	6.18191e+07
A0A452G3I1	Enoyl-CoA hydratase 1	ECH1	Enoyl-CoA hydratase 1 OS=Capra hircus OX=9925 GN=ECH1 PE=3 SV=1	19.031	15	5	7	5	326	35.9	8.29	22.85	5	0	1	2.58078e+07	2.23009e+07	2.35447e+07	2.29271e+07	2.47823e+07	2.39665e+07	2.83496e+07	2.49327e+07
A0A452E082	S-adenosylmethionine synthase	MAT1A	S-adenosylmethionine synthase OS=Capra hircus OX=9925 GN=MAT1A PE=3 SV=1	19.019	14	5	6	5	396	43.8	5.95	20.16	5	0	1	8.11701e+06	1.10459e+07	8.26896e+06	2.16946e+07	6.14819e+06	9.78385e+06	8.09837e+06	8.87448e+06
A0A452DNR0	POC1 centriolar protein A	POC1A	POC1 centriolar protein A OS=Capra hircus OX=9925 GN=POC1A PE=4 SV=1	18.991	11	6	18	4	403	44.7	8.16	57.67	6	0	1	2.33214e+07	2.67318e+07	2.39885e+07	2.35966e+07	2.30872e+07	2.33458e+07	2.45593e+07	2.39614e+07
A0A452DU54	Transmembrane protein 205	TMEM205	Transmembrane protein 205 OS=Capra hircus OX=9925 GN=TMEM205 PE=3 SV=1	18.981	22	3	5	3	189	20.9	8.65	18.41	3	0	1	1.29542e+07	1.34841e+07	1.28469e+07	1.41301e+07	8.63079e+06	1.60375e+07	1.16631e+07	1.41274e+07
A0A452FA95	Radixin	RDX	Radixin OS=Capra hircus OX=9925 GN=RDX PE=4 SV=1	18.949	10	6	7	4	580	68.1	6.27	21.25	6	2	1	2.21076e+07	2.30242e+07	2.17091e+07	2.47794e+07	1.78306e+07	2.23962e+07	2.18941e+07	2.36534e+07
A0A452ET98	Lysine--tRNA ligase		Lysine--tRNA ligase OS=Capra hircus OX=9925 PE=3 SV=1	18.906	7	4	5	4	599	68.6	6.58	18.03	4	0	1	6.88215e+06	7.11861e+06	6.99614e+06	6.85029e+06	7.08739e+06	7.24598e+06	7.25924e+06	7.19953e+06
A0A452FS98	Dickkopf like acrosomal protein 1	DKKL1	Dickkopf like acrosomal protein 1 OS=Capra hircus OX=9925 GN=DKKL1 PE=4 SV=1	18.853	14	3	12	3	233	26.4	7.81	43.78	3	0	1	1.81067e+07	1.91796e+07	1.73117e+07	1.78925e+07	1.80618e+07	1.87892e+07	1.66325e+07	1.64077e+07
A0A452EUA9	Inositol-1-monophosphatase	IMPA1	Inositol-1-monophosphatase OS=Capra hircus OX=9925 GN=IMPA1 PE=3 SV=1	18.807	15	4	19	4	277	30	5.17	50.57	4	0	1	4.97118e+07	5.45522e+07	5.26146e+07	6.34735e+07	5.15446e+07	5.55043e+07	5.42272e+07	5.52915e+07
A0A452EKC1	NADH dehydrogenase [ubiquinone] 1 beta subcomplex subunit 8, mitochondrial	NDUFB8	NADH dehydrogenase [ubiquinone] 1 beta subcomplex subunit 8, mitochondrial OS=Capra hircus OX=9925 GN=NDUFB8 PE=3 SV=1	18.805	26	4	16	4	186	21.7	6.11	47.04	4	0	1	2.84813e+07	3.02377e+07	3.01845e+07	3.53547e+07	2.89686e+07	2.74179e+07	2.85472e+07	3.0545e+07
A0A452FI32	Actin-depolymerizing factor	GSN	Actin-depolymerizing factor OS=Capra hircus OX=9925 GN=GSN PE=3 SV=1	18.749	8	7	9	7	742	81.9	5.77	24.97	7	0	1	3.04241e+07	3.2371e+07	2.7459e+07	2.05608e+07	2.47938e+07	3.00219e+07	2.72197e+07	2.73907e+07
A0A452EN76	Dehydrogenase/reductase 11	DHRS11	Dehydrogenase/reductase 11 OS=Capra hircus OX=9925 GN=DHRS11 PE=3 SV=1	18.71	16	5	9	5	330	35.7	7.43	27.86	5	0	1	2.94909e+07	2.9073e+07	3.04005e+07	2.90359e+07	2.89579e+07	3.12012e+07	3.17562e+07	3.30991e+07
A0A452EHN8	Coiled-coil domain containing 83	CCDC83	Coiled-coil domain containing 83 OS=Capra hircus OX=9925 GN=CCDC83 PE=4 SV=1	18.709	13	7	14	7	413	49	5.74	39.18	7	0	1	3.21349e+07	3.3766e+07	3.17854e+07	3.36779e+07	3.20633e+07	3.40815e+07	3.13715e+07	3.17495e+07
A0A452G227	GCS light chain	GCLM	GCS light chain OS=Capra hircus OX=9925 GN=GCLM PE=3 SV=1	18.707	16	4	5	4	274	30.5	6.3	18.43	4	0	1	2.03595e+07	2.0493e+07	2.09305e+07	1.82006e+07	2.02131e+07	2.09773e+07	2.12759e+07	1.98857e+07
A0A452DVP8	Programmed cell death 6	PDCD6	Programmed cell death 6 OS=Capra hircus OX=9925 GN=PDCD6 PE=4 SV=1	18.682	19	4	9	1	185	21.2	5.1	28.59	4	4	1	2.79956e+07	2.65532e+07	2.6851e+07	2.582e+07	2.78885e+07	2.47043e+07	2.64073e+07	2.46137e+07
A0A452DTT0	2',3'-cyclic-nucleotide 3'-phosphodiesterase	CNP	2',3'-cyclic-nucleotide 3'-phosphodiesterase OS=Capra hircus OX=9925 GN=CNP PE=3 SV=1	18.663	13	6	10	6	421	47.5	8.88	23.6	6	0	1	2.36532e+07	2.37041e+07	2.43346e+07	2.00647e+07	2.40193e+07	2.55981e+07	2.37911e+07	2.29114e+07
A0A452FCU6	EGF like repeats and discoidin domains 3	EDIL3	EGF like repeats and discoidin domains 3 OS=Capra hircus OX=9925 GN=EDIL3 PE=4 SV=1	18.66	15	7	11	7	480	53.6	7.56	22.53	7	0	1	3.38824e+07	2.56038e+07	3.30892e+07	2.26627e+07	2.93119e+07	3.4084e+07	3.47737e+07	3.5643e+07
A0A452G923			Uncharacterized protein OS=Capra hircus OX=9925 PE=4 SV=1	18.606	21	5	14	1	245	28.5	4.96	46.67	5	0	1	2.1669e+07	2.22752e+07	2.28298e+07	2.14383e+07	2.28147e+07	2.31775e+07	2.21947e+07	2.3295e+07
A0A452EE22	Glycerophosphodiester phosphodiesterase domain-containing protein 4-like	LOC102183041	Glycerophosphodiester phosphodiesterase domain-containing protein 4-like OS=Capra hircus OX=9925 GN=LOC102183041 PE=3 SV=1	18.598	4	2	5	1	597	69.8	9.09	17.08	2	0	1	3.72569e+06	4.29425e+06	3.98904e+06	3.40087e+06	3.89706e+06	3.79673e+06	3.66387e+06	3.66131e+06
A0A452F7F0	Signal peptidase complex subunit 3	SPCS3	Signal peptidase complex subunit 3 OS=Capra hircus OX=9925 GN=SPCS3 PE=3 SV=1	18.591	18	3	10	3	180	20.2	9.33	35.43	3	0	1	6.81133e+07	7.30188e+07	7.13808e+07	7.27916e+07	6.38612e+07	6.15767e+07	6.87587e+07	7.10843e+07
A0A452FDJ0	Nudix hydrolase 9	NUDT9	Nudix hydrolase 9 OS=Capra hircus OX=9925 GN=NUDT9 PE=4 SV=1	18.574	12	4	10	4	349	38.6	7.81	28.79	4	0	1	4.00095e+07	4.15108e+07	4.20862e+07	3.65645e+07	4.08846e+07	4.00168e+07	4.25152e+07	4.2673e+07
A0A452EP50	Ubiquilin 1	UBQLN1	Ubiquilin 1 OS=Capra hircus OX=9925 GN=UBQLN1 PE=4 SV=1	18.548	7	3	5	3	576	61.1	5.1	14.61	3	0	1	9.71715e+06	1.00287e+07	1.0086e+07	9.37931e+06	1.01645e+07	9.58292e+06	1.05869e+07	1.02785e+07
A0A452FLW0	Coiled-coil domain containing 175	CCDC175	Coiled-coil domain containing 175 OS=Capra hircus OX=9925 GN=CCDC175 PE=4 SV=1	18.543	8	7	12	7	723	85.7	6.73	33.84	7	0	1	2.57937e+07	2.90283e+07	2.68712e+07	2.52801e+07	2.62538e+07	2.7446e+07	2.5347e+07	2.7141e+07
A0A452FJ27	Dynactin subunit 2	DCTN2	Dynactin subunit 2 OS=Capra hircus OX=9925 GN=DCTN2 PE=3 SV=1	18.518	16	7	10	7	406	44.7	5.21	25.6	7	0	1	3.63991e+07	3.66838e+07	3.6614e+07	3.6055e+07	3.79021e+07	3.79911e+07	3.8624e+07	3.90978e+07
A0A452DN13	Haloacid dehalogenase-like hydrolase domain-containing protein 3	HDHD3	Haloacid dehalogenase-like hydrolase domain-containing protein 3 OS=Capra hircus OX=9925 GN=HDHD3 PE=4 SV=1	18.401	17	4	7	4	251	27.9	8.09	24.22	4	0	1	1.92962e+07	1.948e+07	2.00063e+07	1.99348e+07	2.00676e+07	1.98331e+07	2.04337e+07	2.10914e+07
A0A452EM73	Chromosome 10 open reading frame 67	C10orf67	Chromosome 10 open reading frame 67 OS=Capra hircus OX=9925 GN=C10orf67 PE=4 SV=1	18.391	11	6	10	6	566	65.3	6.4	31.41	6	0	1	3.28743e+07	3.51015e+07	3.22865e+07	3.01426e+07	3.19497e+07	3.03897e+07	3.14104e+07	3.16521e+07
A0A452EGT0	Complex I-B18	NDUFB7	Complex I-B18 OS=Capra hircus OX=9925 GN=NDUFB7 PE=3 SV=1	18.373	33	3	7	3	137	16.3	7.84	29.29	3	0	1	9.53762e+06	1.10946e+07	9.98233e+06	1.12335e+07	1.07378e+07	9.90115e+06	1.03132e+07	9.67522e+06
A0A452FK82	Rho GDP dissociation inhibitor alpha	ARHGDIA	Rho GDP dissociation inhibitor alpha OS=Capra hircus OX=9925 GN=ARHGDIA PE=3 SV=1	18.342	16	3	7	3	204	23.4	5.2	20.33	3	0	1	1.10512e+07	1.1671e+07	1.14562e+07	1.51342e+07	1.17968e+07	1.17525e+07	1.16141e+07	1.21383e+07
A0A452F5I8		LOC106503575	Uncharacterized protein OS=Capra hircus OX=9925 GN=LOC106503575 PE=4 SV=1	18.342	15	2	18	2	164	19.1	9.58	54.13	2	0	1	3.43852e+07	3.9421e+07	3.3492e+07	3.19111e+07	3.57762e+07	3.42143e+07	3.26143e+07	3.32713e+07
A0A452ELK2	Actin related protein 1A	ACTR1A	Actin related protein 1A OS=Capra hircus OX=9925 GN=ACTR1A PE=3 SV=1	18.299	16	6	8	6	376	42.6	6.64	22.33	6	0	1	2.06906e+07	2.24591e+07	2.2045e+07	2.23878e+07	2.048e+07	2.08172e+07	2.321e+07	2.27571e+07
A0A452FRE6	ATP synthase subunit s, mitochondrial	DMAC2L	ATP synthase subunit s, mitochondrial OS=Capra hircus OX=9925 GN=DMAC2L PE=3 SV=1	18.207	21	4	21	4	200	23.3	8.16	61.04	4	0	1	6.03677e+07	6.1357e+07	6.46391e+07	7.51383e+07	6.32652e+07	6.25733e+07	6.37588e+07	7.24724e+07
A0A452E5S9	Extracellular matrix protein 1	ECM1	Extracellular matrix protein 1 OS=Capra hircus OX=9925 GN=ECM1 PE=4 SV=1	18.194	12	6	9	6	524	58.5	7.15	26.28	6	0	1	1.65205e+07	1.68369e+07	1.77367e+07	1.49338e+07	1.74583e+07	1.84643e+07	1.75347e+07	1.7202e+07
A0A452E0C5	Solute carrier family 25 member 37	SLC25A37	Solute carrier family 25 member 37 OS=Capra hircus OX=9925 GN=SLC25A37 PE=3 SV=1	18.187	16	5	11	5	338	37.2	9.26	29.05	5	0	1	3.26265e+07	3.59866e+07	3.73461e+07	3.58263e+07	3.66569e+07	3.51513e+07	3.96693e+07	3.97332e+07
A0A452FBU4	Mono-ADP ribosylhydrolase 1	MACROD1	Mono-ADP ribosylhydrolase 1 OS=Capra hircus OX=9925 GN=MACROD1 PE=4 SV=1	18.161	15	5	15	5	315	34.6	9.09	28.48	5	0	1	1.96574e+07	2.08984e+07	2.08447e+07	1.95208e+07	2.08972e+07	1.99189e+07	2.07315e+07	2.13711e+07
A0A452FHB6	Cysteine dioxygenase	CDO1	Cysteine dioxygenase OS=Capra hircus OX=9925 GN=CDO1 PE=3 SV=1	18.147	16	4	11	4	200	23	6.74	37.51	4	0	1	4.65396e+07	4.61755e+07	4.7106e+07	4.26769e+07	4.77111e+07	4.68249e+07	4.90311e+07	4.664e+07
A0A452E398	Phosphatidylinositol-5-phosphate 4-kinase type 2 gamma	PIP4K2C	Phosphatidylinositol-5-phosphate 4-kinase type 2 gamma OS=Capra hircus OX=9925 GN=PIP4K2C PE=4 SV=1	18.12	12	5	6	5	421	47.1	6.84	18.48	5	0	1	2.45759e+07	2.46193e+07	2.69977e+07	2.24423e+07	2.52283e+07	2.56549e+07	2.8003e+07	2.68393e+07
A0A452DRX7	Leucine rich repeat containing 71	LRRC71	Leucine rich repeat containing 71 OS=Capra hircus OX=9925 GN=LRRC71 PE=4 SV=1	18.028	10	5	10	5	560	61.5	9.13	28.95	5	0	1	3.96094e+07	4.24649e+07	4.62809e+07	3.86524e+07	4.45999e+07	4.09493e+07	4.63789e+07	4.94688e+07
A0A452EQY9	Angel homolog 2	ANGEL2	Angel homolog 2 OS=Capra hircus OX=9925 GN=ANGEL2 PE=4 SV=1	17.94	8	4	6	4	544	62.3	7.27	21.69	4	0	1	1.61769e+07	1.64945e+07	1.67211e+07	1.37734e+07	1.62198e+07	1.67854e+07	1.75523e+07	1.82359e+07
A0A452E112	Chromosome 22 C3orf20 homolog	C3orf20	Chromosome 22 C3orf20 homolog OS=Capra hircus OX=9925 GN=C3orf20 PE=4 SV=1	17.937	7	6	12	6	884	97.9	9.55	36.41	6	0	1	3.28143e+07	3.5145e+07	3.43048e+07	3.3527e+07	3.49521e+07	3.4128e+07	3.38498e+07	3.44534e+07
A0A452ETK5	Myosin light chain 1	MYL1	Myosin light chain 1 OS=Capra hircus OX=9925 GN=MYL1 PE=4 SV=1	17.844	28	4	6	4	158	17.8	5.25	17.59	4	0	1	3.86615e+07	1.30168e+07	1.5597e+07	1.61728e+07	1.38569e+07	1.53585e+07	1.46497e+07	1.41004e+07
A0A452F502	Leucine rich repeats and IQ motif containing 3	LRRIQ3	Leucine rich repeats and IQ motif containing 3 OS=Capra hircus OX=9925 GN=LRRIQ3 PE=4 SV=1	17.804	8	5	8	5	618	72.9	9.58	28.8	5	0	1	2.23166e+07	2.27119e+07	2.47162e+07	2.60608e+07	2.42122e+07	2.32139e+07	2.42118e+07	2.51453e+07
A0A452EQU3	Chromosome 21 C15orf40 homolog	C21H15orf40	Chromosome 21 C15orf40 homolog OS=Capra hircus OX=9925 GN=C21H15orf40 PE=3 SV=1	17.782	29	3	8	3	126	13.3	9.42	26.66	3	0	1	2.96032e+07	3.51385e+07	3.27196e+07	3.56411e+07	3.43516e+07	3.07841e+07	3.03566e+07	3.4731e+07
A0A452FVF4	Archaelysin family metallopeptidase 2	AMZ2	Archaelysin family metallopeptidase 2 OS=Capra hircus OX=9925 GN=AMZ2 PE=3 SV=1	17.733	11	4	17	4	360	41.3	7.99	39.25	4	0	1	1.03053e+08	1.0304e+08	1.08445e+08	9.41127e+07	9.94402e+07	1.04274e+08	1.14237e+08	1.10873e+08
A0A452GA83	ADAM metallopeptidase domain 20	ADAM20	ADAM metallopeptidase domain 20 OS=Capra hircus OX=9925 GN=ADAM20 PE=4 SV=1	17.722	5	4	10	4	731	81.5	6.14	22.47	4	0	1	4.68254e+07	4.49594e+07	4.43809e+07	3.61104e+07	4.68082e+07	4.69787e+07	4.70555e+07	4.44062e+07
A0A452FUR0	UBX domain protein 4	UBXN4	UBX domain protein 4 OS=Capra hircus OX=9925 GN=UBXN4 PE=4 SV=1	17.717	14	6	12	6	508	56.6	6.38	35.83	6	0	1	3.93251e+07	3.92973e+07	3.76937e+07	3.33027e+07	4.02234e+07	4.04114e+07	3.98659e+07	3.89994e+07
A0A452G1W6	Solute carrier family 9 member C2 (putative)	SLC9C2	Solute carrier family 9 member C2 (putative) OS=Capra hircus OX=9925 GN=SLC9C2 PE=3 SV=1	17.676	7	7	8	7	1112	127.9	8	24.18	7	0	1	2.40057e+07	2.38172e+07	2.36031e+07	1.93498e+07	2.45932e+07	2.73154e+07	2.47158e+07	2.37022e+07
A0A452DNC1	Aquaporin 7	AQP7	Aquaporin 7 OS=Capra hircus OX=9925 GN=AQP7 PE=3 SV=1	17.668	12	3	28	3	330	35.9	9.11	68.98	3	0	1	3.92153e+08	3.91157e+08	3.81696e+08	3.47661e+08	3.98597e+08	3.66754e+08	3.95586e+08	3.68973e+08
A0A452G619	Solute carrier family 25 member 35	SLC25A35	Solute carrier family 25 member 35 OS=Capra hircus OX=9925 GN=SLC25A35 PE=3 SV=1	17.641	16	4	9	4	249	27.1	9.36	23.87	4	0	1	3.3172e+07	2.69892e+07	3.56492e+07	2.77983e+07	3.37612e+07	3.63356e+07	3.85503e+07	3.53537e+07
A0A452FA19	ATP6V1F neighbor	ATP6V1FNB	ATP6V1F neighbor OS=Capra hircus OX=9925 GN=ATP6V1FNB PE=4 SV=1	17.635	22	4	26	4	176	20.2	9.85	84.05	4	0	1	1.30614e+08	1.37213e+08	1.53048e+08	1.58773e+08	1.53971e+08	1.35949e+08	1.43751e+08	1.61728e+08
A0A452FUE4	Glutathione transferase	LOC102189813	Glutathione transferase OS=Capra hircus OX=9925 GN=LOC102189813 PE=3 SV=1	17.616	16	4	45	2	231	27	7.42	129.6	4	1	1	8.35056e+06	8.80302e+06	8.7914e+06	1.1874e+07	9.41322e+06	8.88804e+06	9.12791e+06	9.33631e+06
A0A452DY38	Piwi like RNA-mediated gene silencing 1	PIWIL1	Piwi like RNA-mediated gene silencing 1 OS=Capra hircus OX=9925 GN=PIWIL1 PE=3 SV=1	17.575	6	5	8	5	861	98.5	9.39	21.65	5	0	1	1.03859e+07	1.04042e+07	9.09797e+06	9.30834e+06	1.03547e+07	1.08044e+07	9.13474e+06	8.8905e+06
A0A452DQA1	Ubiquitin carboxyl-terminal hydrolase	UCHL5	Ubiquitin carboxyl-terminal hydrolase OS=Capra hircus OX=9925 GN=UCHL5 PE=3 SV=1	17.536	15	4	7	4	325	37	5.05	23.38	4	0	1	9.68476e+06	1.02181e+07	1.00892e+07	9.23482e+06	9.94946e+06	1.00997e+07	1.08234e+07	1.04673e+07
A0A452G1A0	NAD(P)(+)--arginine ADP-ribosyltransferase	ART5	NAD(P)(+)--arginine ADP-ribosyltransferase OS=Capra hircus OX=9925 GN=ART5 PE=3 SV=1	17.518	11	3	5	3	296	32.4	8.19	14.51	3	0	1	2.47707e+07	2.1952e+07	2.09849e+07	1.69343e+07	2.41194e+07	2.33127e+07	2.82013e+07	3.40462e+07
A0A452ETI3	X-prolyl aminopeptidase 3	XPNPEP3	X-prolyl aminopeptidase 3 OS=Capra hircus OX=9925 GN=XPNPEP3 PE=4 SV=1	17.385	11	4	5	4	507	57.2	7.2	16.15	4	0	1	3.18312e+07	3.54035e+07	3.65473e+07	3.43311e+07	3.05287e+07	3.07602e+07	3.44069e+07	3.57941e+07
A0A452EY45	DnaJ heat shock protein family (Hsp40) member B2	DNAJB2	DnaJ heat shock protein family (Hsp40) member B2 OS=Capra hircus OX=9925 GN=DNAJB2 PE=4 SV=1	17.358	16	5	8	4	325	35.8	6.21	22.71	5	0	1	7.84959e+06	7.94785e+06	8.01762e+06	7.12731e+06	8.19876e+06	7.98103e+06	8.07936e+06	8.10779e+06
A0A452DX31	GDP-4-keto-6-deoxy-D-mannose-3,5-epimerase-4-reductase	GFUS	GDP-4-keto-6-deoxy-D-mannose-3,5-epimerase-4-reductase OS=Capra hircus OX=9925 GN=GFUS PE=3 SV=1	17.327	11	3	5	3	321	36	6.96	17.29	3	0	1	1.68684e+07	1.74184e+07	1.84061e+07	1.6058e+07	1.82487e+07	1.78549e+07	1.93582e+07	1.90269e+07
A0A452EJR9	Outer dense fiber of sperm tails 3 like 1	ODF3L1	Outer dense fiber of sperm tails 3 like 1 OS=Capra hircus OX=9925 GN=ODF3L1 PE=4 SV=1	17.212	20	5	8	5	274	30.7	9.86	17.45	5	0	1	3.52974e+07	3.46887e+07	3.78966e+07	3.48419e+07	3.91223e+07	3.89079e+07	3.58866e+07	3.91331e+07
A0A452DKP1	Lysosomal associated membrane protein 1	LAMP1	Lysosomal associated membrane protein 1 OS=Capra hircus OX=9925 GN=LAMP1 PE=3 SV=1	17.208	5	2	9	2	409	43.9	7.88	26.74	2	0	1	1.7861e+07	1.66165e+07	1.74171e+07	1.57783e+07	1.78765e+07	1.80978e+07	1.68617e+07	1.69351e+07
A0A452G586	Chromosome 15 C11orf1 homolog	C11orf1	Chromosome 15 C11orf1 homolog OS=Capra hircus OX=9925 GN=C11orf1 PE=4 SV=1	17.173	17	2	16	2	169	20.1	7.78	45.33	2	0	1	9.7292e+07	9.99436e+07	9.82844e+07	8.16476e+07	9.54433e+07	9.35023e+07	9.93711e+07	1.01188e+08
A0A452EMZ4	1-acyl-sn-glycerol-3-phosphate acyltransferase	AGPAT2	1-acyl-sn-glycerol-3-phosphate acyltransferase OS=Capra hircus OX=9925 GN=AGPAT2 PE=3 SV=1	17.146	15	5	11	5	278	31.2	8.69	29.51	5	0	1	5.03261e+07	5.08283e+07	5.19147e+07	4.69673e+07	4.97167e+07	5.24009e+07	5.17958e+07	5.25633e+07
A0A452EB12	Testis expressed 50	TEX50	Testis expressed 50 OS=Capra hircus OX=9925 GN=TEX50 PE=4 SV=1	17.124	17	3	12	3	179	20.7	9.06	36.81	3	0	1	3.209e+07	2.17736e+07	2.43997e+07	1.94766e+07	3.42551e+07	2.74602e+07	3.68498e+07	2.34329e+07
A0A452EJU6	Complex I-B15	NDUFB4	Complex I-B15 OS=Capra hircus OX=9925 GN=NDUFB4 PE=3 SV=1	17.063	33	4	10	4	129	15.1	9.73	32.04	4	0	1	1.84573e+07	2.07928e+07	2.02649e+07	2.27045e+07	2.1494e+07	1.75827e+07	1.80956e+07	2.09841e+07
A0A452DWJ3	LETM1 domain containing 1	LETMD1	LETM1 domain containing 1 OS=Capra hircus OX=9925 GN=LETMD1 PE=4 SV=1	17.045	9	3	7	3	360	41.9	10.14	31.33	3	0	1	2.20796e+07	2.29051e+07	2.21962e+07	2.39421e+07	2.46425e+07	2.45638e+07	2.28616e+07	2.44299e+07
A0A452EQ12			Uncharacterized protein OS=Capra hircus OX=9925 PE=4 SV=1	17.033	25	3	6	3	155	18.2	9.17	17.87	3	0	1	3.49344e+07	3.67119e+07	3.90557e+07	3.26907e+07	3.66191e+07	3.5641e+07	3.87262e+07	3.961e+07
A0A452F6J9	Selenoprotein V	SELENOV	Selenoprotein V OS=Capra hircus OX=9925 GN=SELENOV PE=4 SV=1	17.024	14	3	9	3	355	37.2	12.06	24.62	3	0	1	2.8517e+07	2.55008e+07	2.39917e+07	2.57456e+07	2.69323e+07	2.41437e+07	2.45353e+07	2.34574e+07
A0A452FEW5	Beta-hexosaminidase	HEXB	Beta-hexosaminidase OS=Capra hircus OX=9925 GN=HEXB PE=3 SV=1	16.956	11	6	11	2	540	61.6	7.36	29.85	6	0	1	1.96215e+06	2.6137e+06	2.08662e+06	2.01833e+06	2.19103e+06	2.10093e+06	1.99289e+06	2.0696e+06
A0A452EK93	Tumor protein, translationally-controlled 1	TPT1	Tumor protein, translationally-controlled 1 OS=Capra hircus OX=9925 GN=TPT1 PE=3 SV=1	16.947	18	3	5	3	192	21.8	5.14	18.66	3	0	1	1.1707e+07	1.24514e+07	1.15808e+07	9.82666e+06	1.18677e+07	1.13628e+07	1.14538e+07	1.10025e+07
A0A452EA71	Protein FAM209A	LOC102178461	Protein FAM209A OS=Capra hircus OX=9925 GN=LOC102178461 PE=4 SV=1	16.943	27	5	14	5	167	19.3	9.8	46.95	5	0	1	1.77359e+08	1.52372e+08	1.41049e+08	1.26621e+08	1.7436e+08	1.44694e+08	1.83044e+08	1.36923e+08
A0A452G700	Nicotinamide-nucleotide adenylyltransferase	NMNAT3	Nicotinamide-nucleotide adenylyltransferase OS=Capra hircus OX=9925 GN=NMNAT3 PE=3 SV=1	16.92	19	4	5	4	242	27.6	7.34	12.06	4	0	1	4.17859e+06	4.4477e+06	4.39568e+06	4.11809e+06	4.59894e+06	4.40741e+06	4.27557e+06	4.54744e+06
A0A452FN70	Barrier to autointegration factor 1	BANF1	Barrier to autointegration factor 1 OS=Capra hircus OX=9925 GN=BANF1 PE=4 SV=1	16.879	36	2	4	2	89	10.1	6.09	18.03	2	0	1	2.07309e+07	2.23797e+07	2.57107e+07	2.80363e+07	2.23148e+07	1.99091e+07	2.4744e+07	2.92963e+07
A0A452G2S0	Eukaryotic translation elongation factor 1 epsilon 1	EEF1E1	Eukaryotic translation elongation factor 1 epsilon 1 OS=Capra hircus OX=9925 GN=EEF1E1 PE=4 SV=1	16.876	16	3	12	3	174	19.7	8.38	36.02	3	0	1	2.28339e+07	2.48881e+07	2.46872e+07	2.44348e+07	2.22615e+07	2.0292e+07	2.35542e+07	2.31064e+07
A0A452F583	Asparagine--tRNA ligase	NARS2	Asparagine--tRNA ligase OS=Capra hircus OX=9925 GN=NARS2 PE=3 SV=1	16.815	12	5	6	5	477	53.8	7.25	15.51	5	0	1	2.60667e+07	2.66082e+07	2.42572e+07	2.20145e+07	2.32299e+07	2.55363e+07	2.39421e+07	2.4947e+07
A0A452EC09	Ubiquitin carboxyl-terminal hydrolase	USP5	Ubiquitin carboxyl-terminal hydrolase OS=Capra hircus OX=9925 GN=USP5 PE=3 SV=1	16.751	7	5	6	5	835	93.3	5.06	19.62	5	0	1	1.04923e+07	1.17563e+07	1.07657e+07	8.51484e+06	1.04913e+07	1.16924e+07	1.07409e+07	1.04325e+07
A0A452FQP6	Carboxylic ester hydrolase	CES5A	Carboxylic ester hydrolase OS=Capra hircus OX=9925 GN=CES5A PE=3 SV=1	16.668	6	3	11	3	576	64.1	6.07	25.3	3	0	1	3.02058e+07	2.47373e+07	2.75061e+07	2.3089e+07	2.85161e+07	2.8936e+07	2.99638e+07	2.42241e+07
A0A452EE81	Glutathione transferase	LOC102185621	Glutathione transferase OS=Capra hircus OX=9925 GN=LOC102185621 PE=3 SV=1	16.596	19	4	8	1	218	25.6	7.39	30.97	4	0	1	383937	493782	445678	486699	570320	424465	528857	533651
A0A452FWB8	DnaJ heat shock protein family (Hsp40) member C5 gamma	DNAJC5G	DnaJ heat shock protein family (Hsp40) member C5 gamma OS=Capra hircus OX=9925 GN=DNAJC5G PE=4 SV=1	16.584	23	5	9	5	174	19.5	8.05	29.75	5	0	1	1.45335e+07	1.55173e+07	1.38348e+07	1.47748e+07	1.47855e+07	1.38816e+07	1.42243e+07	1.43687e+07
A0A452FFF8	Spermatogenesis associated 4	SPATA4	Spermatogenesis associated 4 OS=Capra hircus OX=9925 GN=SPATA4 PE=4 SV=1	16.579	16	5	7	5	353	39.5	9.74	16.92	5	0	1	5.11046e+07	5.39467e+07	5.42485e+07	5.21533e+07	5.36966e+07	5.08692e+07	5.2532e+07	5.71177e+07
A0A097C2Y8	Peptidyl-prolyl cis-trans isomerase (Fragment)	PPIB	Peptidyl-prolyl cis-trans isomerase (Fragment) OS=Capra hircus OX=9925 GN=PPIB PE=2 SV=1	16.525	30	7	9	6	216	23.7	9.32	18.59	7	0	1	3.31836e+07	3.39597e+07	3.32167e+07	4.39175e+07	2.82633e+07	3.5335e+07	3.29389e+07	3.42687e+07
A0A452DLT9	Dihydroorotate dehydrogenase (quinone), mitochondrial	DHODH	Dihydroorotate dehydrogenase (quinone), mitochondrial OS=Capra hircus OX=9925 GN=DHODH PE=3 SV=1	16.525	18	6	7	6	382	41.2	9.16	20.21	6	0	1	2.82971e+07	3.02028e+07	2.87287e+07	2.58989e+07	2.94645e+07	2.71008e+07	3.01818e+07	2.98118e+07
A0A452FRV2	BolA family member 1	BOLA1	BolA family member 1 OS=Capra hircus OX=9925 GN=BOLA1 PE=3 SV=1	16.507	30	4	8	4	132	14.1	8.76	28.44	4	0	1	4.86837e+07	5.43993e+07	5.11774e+07	4.58454e+07	5.23168e+07	4.78218e+07	4.88118e+07	4.98633e+07
A0A452EN28	Lysophosphatidylcholine acyltransferase 3	LPCAT3	Lysophosphatidylcholine acyltransferase 3 OS=Capra hircus OX=9925 GN=LPCAT3 PE=4 SV=1	16.502	7	3	9	3	485	55.8	8.78	16.46	3	0	1	1.85777e+07	1.94123e+07	1.90484e+07	1.63682e+07	1.97465e+07	1.97432e+07	1.99958e+07	1.82205e+07
A0A452DTB9	Synaptophysin like 1	SYPL1	Synaptophysin like 1 OS=Capra hircus OX=9925 GN=SYPL1 PE=3 SV=1	16.499	16	3	5	3	256	28.4	8.76	15.69	3	0	1	3.23864e+07	3.17566e+07	3.50672e+07	4.50411e+07	3.86131e+07	3.3785e+07	3.86208e+07	4.1104e+07
A0A452DQF1	RAB4B, member RAS oncogene family	RAB4B	RAB4B, member RAS oncogene family OS=Capra hircus OX=9925 GN=RAB4B PE=4 SV=1	16.462	20	4	10	3	197	21.7	6.04	30.58	4	0	1	6.06429e+06	6.41097e+06	6.16768e+06	5.44667e+06	6.25754e+06	6.2409e+06	6.26475e+06	6.09224e+06
A0A452EWD3			Uncharacterized protein OS=Capra hircus OX=9925 PE=3 SV=1	16.404	32	4	4	4	173	18.3	10.24	16.03	4	0	1	1.33132e+07	1.34088e+07	1.28398e+07	1.15922e+07	1.26065e+07	1.23756e+07	1.26149e+07	1.25279e+07
A0A452DT39	Chromosome 28 C10orf53 homolog	C28H10orf53	Chromosome 28 C10orf53 homolog OS=Capra hircus OX=9925 GN=C28H10orf53 PE=3 SV=1	16.326	38	3	11	3	93	10.4	5.41	31.71	3	0	1	3.49132e+07	3.46343e+07	3.85234e+07	3.40992e+07	3.75295e+07	3.18729e+07	3.9912e+07	3.97091e+07
A0A452G7P2	Phosphoribosyl pyrophosphate synthetase associated protein 1	PRPSAP1	Phosphoribosyl pyrophosphate synthetase associated protein 1 OS=Capra hircus OX=9925 GN=PRPSAP1 PE=3 SV=1	16.322	13	5	11	5	385	42.5	8.22	31.75	5	0	1	6.10432e+07	5.86836e+07	6.45462e+07	4.99333e+07	5.79495e+07	6.5954e+07	7.1707e+07	7.3656e+07
A0A452G9T7	Ribosome maturation protein SBDS	SBDS	Ribosome maturation protein SBDS OS=Capra hircus OX=9925 GN=SBDS PE=3 SV=1	16.189	14	5	10	5	250	28.7	8.75	27.16	5	0	1	4.12355e+07	4.14602e+07	4.25307e+07	3.64989e+07	4.13829e+07	3.92983e+07	4.22722e+07	4.06752e+07
A0A452FTP7	Glutathione transferase	GSTT4	Glutathione transferase OS=Capra hircus OX=9925 GN=GSTT4 PE=3 SV=1	16.171	17	4	8	4	241	27.9	7.21	20.88	4	0	1	2.47841e+07	2.58368e+07	2.53236e+07	2.50154e+07	2.74844e+07	2.75398e+07	2.40979e+07	2.77671e+07
A0A452E7K8	3'(2'), 5'-bisphosphate nucleotidase 1	BPNT1	3'(2'), 5'-bisphosphate nucleotidase 1 OS=Capra hircus OX=9925 GN=BPNT1 PE=3 SV=1	16.155	12	4	9	4	308	33.3	5.53	26.62	4	0	1	3.59446e+07	3.58629e+07	3.62116e+07	3.64765e+07	3.62088e+07	3.64163e+07	3.69685e+07	3.81682e+07
A0A452FKH5			Uncharacterized protein OS=Capra hircus OX=9925 PE=4 SV=1	16.131	30	3	26	3	134	15	4.34	69.9	3	0	1	7.78549e+08	6.53751e+08	6.81142e+08	6.27001e+08	7.98685e+08	5.78863e+08	6.01546e+08	5.24235e+08
A0A452F873	Cytochrome c oxidase subunit	COX6B2	Cytochrome c oxidase subunit OS=Capra hircus OX=9925 GN=COX6B2 PE=3 SV=1	16.106	53	5	39	4	88	10.5	9.41	101.55	5	2	1	5.44933e+08	5.69785e+08	6.66167e+08	8.56421e+08	7.23581e+08	5.8671e+08	6.04979e+08	8.05875e+08
A0A452FKR3	Maestro heat like repeat family member 5	MROH5	Maestro heat like repeat family member 5 OS=Capra hircus OX=9925 GN=MROH5 PE=4 SV=1	16.097	4	4	7	4	1285	144.6	7.43	17.71	4	0	1	1.74981e+07	1.77432e+07	1.83254e+07	1.45153e+07	1.84311e+07	2.01942e+07	1.89337e+07	1.88556e+07
A0A452FMI1	RAB28, member RAS oncogene family	RAB28	RAB28, member RAS oncogene family OS=Capra hircus OX=9925 GN=RAB28 PE=4 SV=1	16.014	17	4	10	1	220	24.7	5.87	24.7	4	0	1	2.16227e+06	1.96174e+06	2.23137e+06	1.97827e+06	2.21137e+06	2.3389e+06	2.19067e+06	2.05885e+06
A0A452G000	DAZ associated protein 1	DAZAP1	DAZ associated protein 1 OS=Capra hircus OX=9925 GN=DAZAP1 PE=4 SV=1	15.945	4	1	5	1	406	43.5	8.92	14.11	1	0	1	6.7964e+06	6.50837e+06	7.05589e+06	5.35845e+06	6.68067e+06	6.86941e+06	7.00411e+06	6.49327e+06
A0A452EW09	Ribose-5-phosphate isomerase	RPIA	Ribose-5-phosphate isomerase OS=Capra hircus OX=9925 GN=RPIA PE=3 SV=1	15.921	21	5	5	5	305	32.7	9	14.84	5	0	1	3.02591e+07	3.24492e+07	3.20068e+07	2.82735e+07	3.10032e+07	3.05233e+07	3.2728e+07	3.3179e+07
A0A452FXM8	CLN5 intracellular trafficking protein	CLN5	CLN5 intracellular trafficking protein OS=Capra hircus OX=9925 GN=CLN5 PE=3 SV=1	15.834	12	5	8	5	359	41.2	8.16	19.93	5	0	1	3.19837e+07	2.53287e+07	2.98567e+07	2.35035e+07	2.7897e+07	3.29756e+07	3.00255e+07	3.02428e+07
A0A452ELM5	Leucine rich repeat containing 72	LRRC72	Leucine rich repeat containing 72 OS=Capra hircus OX=9925 GN=LRRC72 PE=4 SV=1	15.828	17	5	9	5	288	33.5	8.16	26.64	5	0	1	1.39181e+07	1.83805e+07	1.44981e+07	1.554e+07	1.65501e+07	1.42092e+07	1.45564e+07	1.58476e+07
A0A452E533	LYR motif containing 4	LYRM4	LYR motif containing 4 OS=Capra hircus OX=9925 GN=LYRM4 PE=4 SV=1	15.795	35	3	10	3	91	10.7	10.54	23.62	3	0	1	3.30386e+07	3.4735e+07	3.40463e+07	3.72016e+07	3.54816e+07	3.37086e+07	3.36036e+07	3.69318e+07
A0A452F6I3	Phosphoglucomutase 1	PGM1	Phosphoglucomutase 1 OS=Capra hircus OX=9925 GN=PGM1 PE=3 SV=1	15.786	10	6	7	6	562	61.5	6.81	18.77	6	0	1	2.59439e+07	2.55699e+07	2.21583e+07	2.43048e+07	2.26533e+07	2.29515e+07	2.27277e+07	2.27454e+07
A0A452FQE3	Malic enzyme	ME1	Malic enzyme OS=Capra hircus OX=9925 GN=ME1 PE=3 SV=1	15.786	11	5	7	5	571	64	6.55	16.18	5	0	1	1.10198e+07	1.28352e+07	1.12782e+07	1.20182e+07	1.19715e+07	1.31333e+07	1.1634e+07	1.23338e+07
A0A452E5Q4	Mitochondrial pyruvate carrier	LOC108637636	Mitochondrial pyruvate carrier OS=Capra hircus OX=9925 GN=LOC108637636 PE=3 SV=1	15.771	16	3	11	3	127	14.3	10.43	33.39	3	0	1	7.58866e+07	1.24765e+08	8.23416e+07	9.58979e+07	8.124e+07	9.58474e+07	8.13863e+07	9.17645e+07
A0A452E7A9	Actinin alpha 4	ACTN4	Actinin alpha 4 OS=Capra hircus OX=9925 GN=ACTN4 PE=3 SV=1	15.743	6	5	8	4	933	107.2	5.41	19.13	5	1	1	6.25555e+06	9.12279e+06	5.67354e+06	8.73993e+06	6.58133e+06	6.47791e+06	5.76737e+06	5.62e+06
A0A452FP11	WD repeat domain 38	WDR38	WD repeat domain 38 OS=Capra hircus OX=9925 GN=WDR38 PE=4 SV=1	15.675	14	4	11	4	296	32.7	9.23	30.99	4	0	1	3.1219e+07	3.07811e+07	2.96515e+07	3.05067e+07	2.56429e+07	3.09549e+07	3.01077e+07	3.09893e+07
A0A452DSE1	H1.4 linker histone, cluster member	H1-4	H1.4 linker histone, cluster member OS=Capra hircus OX=9925 GN=H1-4 PE=3 SV=1	15.633	21	5	7	2	219	21.9	11.03	15.05	5	3	1	1.92754e+07	1.88969e+07	1.77646e+07	3.86107e+07	1.66849e+07	2.33838e+07	1.82037e+07	1.8923e+07
A0A452G9M2	Sulfurtransferase	MPST	Sulfurtransferase OS=Capra hircus OX=9925 GN=MPST PE=4 SV=1	15.608	20	5	10	5	297	33.2	6.62	24.77	5	0	1	3.81845e+07	3.78279e+07	3.7996e+07	3.33276e+07	3.70227e+07	3.84921e+07	3.80526e+07	3.93203e+07
A0A452EUA3	Chromosome 25 C16orf96 homolog	C25H16orf96	Chromosome 25 C16orf96 homolog OS=Capra hircus OX=9925 GN=C25H16orf96 PE=4 SV=1	15.577	6	5	8	5	904	95.8	6.13	18.01	5	0	1	2.72128e+07	3.04097e+07	2.77719e+07	2.51804e+07	2.9149e+07	2.74327e+07	2.69233e+07	2.86462e+07
A0A452E7C7	Prostaglandin E synthase 3		Prostaglandin E synthase 3 OS=Capra hircus OX=9925 PE=4 SV=1	15.572	32	4	9	4	149	17.4	4.7	24.58	4	0	1	2.07027e+07	1.85667e+07	2.03375e+07	2.19547e+07	2.11022e+07	2.06987e+07	2.1017e+07	1.92074e+07
A0A452FHH4	SPRY domain containing 4	SPRYD4	SPRY domain containing 4 OS=Capra hircus OX=9925 GN=SPRYD4 PE=4 SV=1	15.544	14	3	5	3	207	23.2	8.02	15.6	3	0	1	5.36211e+06	5.93478e+06	5.32521e+06	5.26814e+06	5.27948e+06	5.4625e+06	5.00176e+06	5.05337e+06
A0A452DJY4	Ciliary associated calcium binding coiled-coil 1	CABCOCO1	Ciliary associated calcium binding coiled-coil 1 OS=Capra hircus OX=9925 GN=CABCOCO1 PE=4 SV=1	15.497	12	2	10	2	206	23.8	4.48	25.32	2	0	1	1.31071e+07	1.37467e+07	1.34178e+07	1.31913e+07	1.43714e+07	1.33083e+07	1.28335e+07	1.30917e+07
A0A452DZX8	Anoctamin	ANO5	Anoctamin OS=Capra hircus OX=9925 GN=ANO5 PE=3 SV=1	15.487	7	6	8	6	855	100.3	8.07	20.91	6	0	1	1.86473e+07	1.94723e+07	1.94204e+07	1.82524e+07	1.95277e+07	2.00098e+07	1.86161e+07	1.93637e+07
A0A452DTT2	AP-1 complex subunit gamma	AP1G1	AP-1 complex subunit gamma OS=Capra hircus OX=9925 GN=AP1G1 PE=3 SV=1	15.487	6	6	7	6	822	91.3	6.8	14.77	6	0	1	2.17661e+07	2.16845e+07	2.29802e+07	1.92902e+07	2.26147e+07	2.26769e+07	2.37809e+07	2.39131e+07
A0A452FPB4	Tetratricopeptide repeat domain 19	TTC19	Tetratricopeptide repeat domain 19 OS=Capra hircus OX=9925 GN=TTC19 PE=4 SV=1	15.474	10	4	8	4	365	40.6	6.7	22.5	4	0	1	2.28014e+07	2.3604e+07	2.16889e+07	2.7854e+07	2.10572e+07	2.14063e+07	2.00931e+07	2.02149e+07
A0A452G4H1	Matrin 3	MATR3	Matrin 3 OS=Capra hircus OX=9925 GN=MATR3 PE=4 SV=1	15.465	4	3	4	3	849	94.6	6.25	9.53	3	0	1	3.37548e+06	3.14414e+06	3.17159e+06	2.84927e+06	3.745e+06	3.74961e+06	3.01628e+06	2.8819e+06
A0A452DT65	GTP-binding nuclear protein Ran	LOC108637516	GTP-binding nuclear protein Ran OS=Capra hircus OX=9925 GN=LOC108637516 PE=3 SV=1	15.438	14	3	7	3	216	24.4	7.49	20.57	3	0	1	4.53256e+07	5.00339e+07	4.37088e+07	4.02353e+07	4.42654e+07	4.57421e+07	4.6608e+07	4.77005e+07
A0A452E7A4	Glutathione transferase	LOC102178383	Glutathione transferase OS=Capra hircus OX=9925 GN=LOC102178383 PE=3 SV=1	15.405	21	4	5	4	239	27.3	7.46	15.3	4	0	1	2.29068e+06	2.4436e+06	2.23391e+06	2.4423e+06	2.46148e+06	2.47011e+06	2.17942e+06	2.1008e+06
A0A452DVL0	Fumarylacetoacetate hydrolase domain containing 1	FAHD1	Fumarylacetoacetate hydrolase domain containing 1 OS=Capra hircus OX=9925 GN=FAHD1 PE=3 SV=1	15.357	23	5	8	5	224	24.9	7.36	24.41	5	0	1	1.41966e+07	1.90352e+07	1.56546e+07	1.6955e+07	1.7184e+07	1.53971e+07	1.60578e+07	1.87293e+07
A0A452F7P2	BPI fold containing family A member 3	BPIFA3	BPI fold containing family A member 3 OS=Capra hircus OX=9925 GN=BPIFA3 PE=4 SV=1	15.345	13	3	9	3	238	27.1	7.52	22.86	3	0	1	1.42573e+07	1.56533e+07	1.4368e+07	1.3654e+07	1.5018e+07	1.48671e+07	1.42958e+07	1.42174e+07
A0A452G065	WD_REPEATS_REGION domain-containing protein		WD_REPEATS_REGION domain-containing protein OS=Capra hircus OX=9925 PE=4 SV=1	15.291	20	4	8	4	188	21	6.71	27.1	4	0	1	3.97759e+07	4.1143e+07	4.31854e+07	3.92113e+07	4.3082e+07	4.46978e+07	4.46981e+07	4.44433e+07
A0A452DXY5	Barrier to autointegration factor 2	BANF2	Barrier to autointegration factor 2 OS=Capra hircus OX=9925 GN=BANF2 PE=4 SV=1	15.181	32	2	5	2	90	10.4	6.27	20.35	2	0	1	1.73841e+07	1.75491e+07	1.86013e+07	2.573e+07	1.88893e+07	1.99303e+07	1.71702e+07	1.82649e+07
A0A452FMX8	Serine/threonine-protein phosphatase	PPP4C	Serine/threonine-protein phosphatase OS=Capra hircus OX=9925 GN=PPP4C PE=3 SV=1	15.173	8	2	7	2	307	35.1	5.06	22.15	2	0	1	1.5265e+07	1.55133e+07	1.49012e+07	1.35374e+07	1.48204e+07	1.60059e+07	1.58846e+07	1.69545e+07
A0A452F304	Proprotein convertase subtilisin/kexin type 4	PCSK4	Proprotein convertase subtilisin/kexin type 4 OS=Capra hircus OX=9925 GN=PCSK4 PE=3 SV=1	15.153	7	5	11	5	773	84.6	7.93	30.24	5	0	1	2.41966e+07	1.82607e+07	1.87343e+07	1.79398e+07	1.85271e+07	1.86659e+07	1.83182e+07	1.83721e+07
A0A452E6X5	DUF4550 domain-containing protein		DUF4550 domain-containing protein OS=Capra hircus OX=9925 PE=4 SV=1	15.137	10	5	8	5	556	62.1	9	20.07	5	0	1	3.86954e+07	3.81147e+07	3.71846e+07	3.55212e+07	3.70578e+07	3.80139e+07	3.69895e+07	3.81621e+07
A0A452G5U6	Cytochrome c oxidase subunit	LOC102172376	Cytochrome c oxidase subunit OS=Capra hircus OX=9925 GN=LOC102172376 PE=3 SV=1	15.122	42	2	5	2	111	12.2	8.85	23.92	2	0	1	1.54228e+07	1.87736e+07	1.62379e+07	1.89769e+07	1.33689e+07	1.66542e+07	1.7152e+07	1.91385e+07
A0A452DP80	Aldo-keto reductase family 1 member E2	AKR1E2	Aldo-keto reductase family 1 member E2 OS=Capra hircus OX=9925 GN=AKR1E2 PE=3 SV=1	15.119	7	3	5	3	303	34.5	7.78	17.22	3	0	1	1.25629e+07	1.32496e+07	1.32977e+07	1.2953e+07	1.45418e+07	1.28948e+07	1.44474e+07	1.62029e+07
A0A452FEX6	Complex I-B22	NDUFB9	Complex I-B22 OS=Capra hircus OX=9925 GN=NDUFB9 PE=3 SV=1	15.066	16	3	9	3	179	21.8	8.63	23.7	3	0	1	1.76764e+07	1.87004e+07	1.88373e+07	2.08919e+07	2.25822e+07	1.79502e+07	1.94411e+07	2.00662e+07
A0A452G4S5	Methylcrotonoyl-CoA carboxylase 1	MCCC1	Methylcrotonoyl-CoA carboxylase 1 OS=Capra hircus OX=9925 GN=MCCC1 PE=4 SV=1	14.948	8	5	7	5	707	78.8	8.21	18.37	5	0	1	1.60579e+07	1.78408e+07	1.64907e+07	1.42451e+07	1.58874e+07	1.52785e+07	1.76917e+07	1.73958e+07
A0A452FE88	Aflatoxin B1 aldehyde reductase member 3	LOC106503221	Aflatoxin B1 aldehyde reductase member 3 OS=Capra hircus OX=9925 GN=LOC106503221 PE=4 SV=1	14.918	15	4	12	1	342	38	6.74	23.02	4	0	1	1.17637e+07	4.17118e+06	1.16999e+07	3.82001e+06	7.4484e+06	1.16655e+07	1.24012e+07	1.27549e+07
A0A452DP54	Bridging integrator 2	BIN2	Bridging integrator 2 OS=Capra hircus OX=9925 GN=BIN2 PE=4 SV=1	14.869	10	5	8	4	493	55	5.17	22.96	5	1	1	1.59568e+07	1.63759e+07	1.71702e+07	1.58571e+07	1.72052e+07	1.67711e+07	1.74082e+07	1.72586e+07
A0A452FKB0	H1.2 linker histone, cluster member	H1-2	H1.2 linker histone, cluster member OS=Capra hircus OX=9925 GN=H1-2 PE=3 SV=1	14.82	17	4	7	1	227	22.8	11	20.5	4	0	1	3.16816e+06	2.66112e+06	2.90399e+06	6.26938e+06	3.33181e+06	3.39501e+06	2.78453e+06	2.73932e+06
A0A452DKF5	Chromosome X CXorf66 homolog	CXHXorf66	Chromosome X CXorf66 homolog OS=Capra hircus OX=9925 GN=CXHXorf66 PE=4 SV=1	14.709	13	5	5	5	379	42.5	9.66	12.44	5	0	1	1.88905e+07	1.69298e+07	1.78599e+07	1.4962e+07	1.87216e+07	1.79624e+07	2.1353e+07	1.68064e+07
A0A452EK88	Beta-galactosidase	GLB1	Beta-galactosidase OS=Capra hircus OX=9925 GN=GLB1 PE=3 SV=1	14.699	6	4	7	3	646	72.6	7.61	21.02	4	0	1	1.19442e+07	1.28102e+07	1.00472e+07	1.03053e+07	1.09943e+07	1.18755e+07	1.00302e+07	9.91992e+06
A0A452EJ62			Uncharacterized protein OS=Capra hircus OX=9925 PE=4 SV=1	14.691	18	3	6	3	287	31.4	7.42	26.73	3	0	1	1.03412e+07	1.00129e+07	9.50143e+06	8.40734e+06	1.00321e+07	1.08727e+07	1.09346e+07	9.21245e+06
A0A452FMY8	RAB28, member RAS oncogene family	RAB28	RAB28, member RAS oncogene family OS=Capra hircus OX=9925 GN=RAB28 PE=4 SV=1	14.688	16	4	9	1	221	24.8	6.35	21.61	4	3	1	2.76632e+07	3.17821e+07	2.31908e+07	2.24557e+07	2.649e+07	3.28286e+07	2.7809e+07	2.41333e+07
A0A452DPW3	Chromosome 16 C1orf100 homolog	C1orf100	Chromosome 16 C1orf100 homolog OS=Capra hircus OX=9925 GN=C1orf100 PE=4 SV=1	14.687	18	2	8	2	138	16.6	9.33	22.02	2	0	1	1.54103e+07	1.53916e+07	1.58166e+07	1.38308e+07	1.52094e+07	1.65673e+07	1.54164e+07	1.62319e+07
A0A452EBW9	TBC1 domain family member 31	TBC1D31	TBC1 domain family member 31 OS=Capra hircus OX=9925 GN=TBC1D31 PE=4 SV=1	14.681	6	6	7	6	948	110.8	8.37	18.93	6	0	1	9.71097e+06	9.99569e+06	9.79949e+06	8.73383e+06	9.76633e+06	1.04856e+07	9.85056e+06	9.63336e+06
A0A452FQ48	Chromosome X CXorf65 homolog	CXorf65	Chromosome X CXorf65 homolog OS=Capra hircus OX=9925 GN=CXorf65 PE=4 SV=1	14.646	23	4	7	4	174	19.7	9.6	13.89	4	0	1	1.84087e+07	1.79825e+07	1.79604e+07	1.64433e+07	1.76285e+07	1.76316e+07	1.96392e+07	1.77519e+07
A0A452F0M7	V-type proton ATPase subunit	ATP6V0D1	V-type proton ATPase subunit OS=Capra hircus OX=9925 GN=ATP6V0D1 PE=3 SV=1	14.64	8	3	6	3	351	40.3	5	19.36	3	0	1	9.78261e+06	1.04868e+07	1.01022e+07	1.21237e+07	1.14336e+07	1.08782e+07	1.03815e+07	1.11041e+07
A0A452DL79	Peroxiredoxin-like 2 activated in M-CSF stimulated monocytes	PRXL2A	Peroxiredoxin-like 2 activated in M-CSF stimulated monocytes OS=Capra hircus OX=9925 GN=PRXL2A PE=3 SV=1	14.612	16	4	8	4	229	25.6	8.34	19.36	4	0	1	2.79466e+07	2.68445e+07	2.67189e+07	2.38646e+07	2.68384e+07	2.67781e+07	2.82113e+07	2.80841e+07
A0A452F6P6	Keratin 8	KRT8	Keratin 8 OS=Capra hircus OX=9925 GN=KRT8 PE=3 SV=1	14.543	4	2	10	1	472	52.9	5.82	24.04	2	0	1	1.4713e+06	1.49198e+06	1.49486e+06	2.50167e+06	1.48417e+06	1.5674e+06	1.53141e+06	1.45074e+06
A0A452EQY4	GUCA1A neighbor	GUCA1ANB	GUCA1A neighbor OS=Capra hircus OX=9925 GN=GUCA1ANB PE=4 SV=1	14.487	35	4	8	4	124	14.1	10.05	21.29	4	0	1	1.00892e+07	1.16415e+07	1.04589e+07	1.05188e+07	1.03266e+07	1.06936e+07	1.0103e+07	1.06459e+07
A0A452FX99	dTMP kinase	DTYMK	dTMP kinase OS=Capra hircus OX=9925 GN=DTYMK PE=3 SV=1	14.418	22	5	9	5	212	23.8	8.46	21.98	5	0	1	5.12125e+07	5.48411e+07	5.39577e+07	5.22586e+07	5.40363e+07	5.34745e+07	5.07669e+07	5.27963e+07
A0A452G8Z2	Solute carrier family 44 member 5	SLC44A5	Solute carrier family 44 member 5 OS=Capra hircus OX=9925 GN=SLC44A5 PE=3 SV=1	14.413	5	6	20	6	729	83	8.72	51.72	6	0	1	9.07035e+07	9.03911e+07	9.45759e+07	8.55175e+07	8.95976e+07	8.21578e+07	9.46649e+07	9.39691e+07
A0A452G457	Protein-L-isoaspartate O-methyltransferase	PCMT1	Protein-L-isoaspartate O-methyltransferase OS=Capra hircus OX=9925 GN=PCMT1 PE=3 SV=1	14.402	13	4	7	4	298	31.6	6.35	18.02	4	0	1	3.66264e+07	8.8057e+07	2.90697e+07	4.18594e+07	3.70982e+07	3.64223e+07	3.78051e+07	3.99254e+07
A0A452F5G7	Unconventional myosin-6	MYO6	Unconventional myosin-6 OS=Capra hircus OX=9925 GN=MYO6 PE=3 SV=1	14.4	5	4	4	4	1254	145	8.41	13.36	4	0	1	5.15381e+06	5.93519e+06	5.24422e+06	4.69309e+06	5.48311e+06	5.51147e+06	5.77839e+06	5.85413e+06
A0A452F623	Histone H2A	H2AZ1	Histone H2A OS=Capra hircus OX=9925 GN=H2AZ1 PE=3 SV=1	14.387	20	3	14	1	128	13.5	10.58	26.41	3	0	1	1.14538e+07	1.23831e+07	1.11745e+07	1.83545e+07	8.1135e+06	1.17625e+07	1.08702e+07	1.22709e+07
A0A452ERU1	Chromosome 22 C3orf84 homolog	C3orf84	Chromosome 22 C3orf84 homolog OS=Capra hircus OX=9925 GN=C3orf84 PE=4 SV=1	14.348	24	4	10	4	204	23.4	9.66	30.38	4	0	1	3.42984e+07	3.67508e+07	3.7788e+07	3.68442e+07	3.85375e+07	3.82679e+07	3.93964e+07	4.33532e+07
A0A452G177	Deoxyguanosine kinase	DGUOK	Deoxyguanosine kinase OS=Capra hircus OX=9925 GN=DGUOK PE=3 SV=1	14.32	21	4	7	4	277	32.1	8.68	22.27	4	0	1	2.07204e+07	1.82622e+07	1.99524e+07	1.86893e+07	2.14825e+07	1.76136e+07	2.29063e+07	2.02092e+07
A0A452FT18	Arrestin domain containing 5	ARRDC5	Arrestin domain containing 5 OS=Capra hircus OX=9925 GN=ARRDC5 PE=3 SV=1	14.272	17	6	9	6	326	36.2	7.93	25.31	6	0	1	4.11972e+07	6.27624e+07	4.05162e+07	4.35838e+07	4.16335e+07	4.34279e+07	4.21612e+07	4.31523e+07
A0A452GA81	RNA-splicing ligase RtcB homolog	RTCB	RNA-splicing ligase RtcB homolog OS=Capra hircus OX=9925 GN=RTCB PE=3 SV=1	14.244	6	3	6	3	505	55.2	7.23	17.7	3	0	1	5.7039e+06	5.87627e+06	5.36209e+06	5.69261e+06	6.05945e+06	6.42227e+06	5.29329e+06	5.33469e+06
A0A452F0N5	Ectonucleoside triphosphate diphosphohydrolase 1	ENTPD1	Ectonucleoside triphosphate diphosphohydrolase 1 OS=Capra hircus OX=9925 GN=ENTPD1 PE=3 SV=1	14.229	7	4	9	4	517	58.7	7.75	26.91	4	0	1	5.80271e+07	5.92128e+07	6.08228e+07	5.33626e+07	5.68983e+07	5.73885e+07	6.18168e+07	6.04393e+07
A0A452E8X2	ADP-ribosylhydrolase like 2	ADPRS	ADP-ribosylhydrolase like 2 OS=Capra hircus OX=9925 GN=ADPRS PE=3 SV=1	14.217	8	3	5	3	368	39.4	4.88	15.37	3	0	1	1.66994e+07	1.78937e+07	1.71893e+07	1.55872e+07	1.7953e+07	1.70971e+07	1.69439e+07	1.74412e+07
A0A452ERR6	Glycosylphosphatidylinositol anchored molecule like	GML	Glycosylphosphatidylinositol anchored molecule like OS=Capra hircus OX=9925 GN=GML PE=4 SV=1	14.212	11	2	32	2	154	18	7.83	102.95	2	0	1	3.26664e+08	3.45014e+08	3.09869e+08	3.07751e+08	3.49497e+08	3.22575e+08	3.22936e+08	3.22155e+08
A0A452FRG6	SHC binding and spindle associated 1 like	SHCBP1L	SHC binding and spindle associated 1 like OS=Capra hircus OX=9925 GN=SHCBP1L PE=4 SV=1	14.199	8	5	7	5	617	68.8	5.2	22.05	5	0	1	4.30581e+07	4.10975e+07	2.17896e+07	4.38082e+07	2.43044e+07	3.5901e+07	3.04761e+07	3.74197e+07
A0A452EEZ8	Reticulocalbin 1	RCN1	Reticulocalbin 1 OS=Capra hircus OX=9925 GN=RCN1 PE=4 SV=1	14.192	14	4	5	4	331	38.8	4.91	14.71	4	0	1	7.42738e+06	8.24385e+06	7.15083e+06	6.42783e+06	6.91507e+06	7.17224e+06	6.76435e+06	6.53078e+06
A0A452F406	Actin-depolymerizing factor		Actin-depolymerizing factor OS=Capra hircus OX=9925 PE=3 SV=1	14.18	17	3	5	3	165	18.5	7.85	6.69	3	0	1	1.14225e+07	1.0176e+07	1.15604e+07	1.07411e+07	1.19426e+07	1.22622e+07	1.14988e+07	1.1294e+07
A0A452FNZ8	Ubiquitin protein ligase E3 component n-recognin 4	UBR4	Ubiquitin protein ligase E3 component n-recognin 4 OS=Capra hircus OX=9925 GN=UBR4 PE=3 SV=1	14.163	1	5	6	5	5180	571	6.1	15.29	5	0	1	1.18173e+07	1.21924e+07	1.21173e+07	1.13665e+07	1.22986e+07	1.27929e+07	1.24336e+07	1.24439e+07
A0A452EBJ3	40S ribosomal protein S3	RPS3	40S ribosomal protein S3 OS=Capra hircus OX=9925 GN=RPS3 PE=3 SV=1	14.146	23	6	7	6	243	26.7	9.66	18.77	6	0	1	2.63475e+07	2.67696e+07	2.66013e+07	4.2888e+07	2.36039e+07	2.96925e+07	2.62823e+07	2.67511e+07
D3INW8	Argininosuccinate synthase (Fragment)		Argininosuccinate synthase (Fragment) OS=Capra hircus OX=9925 PE=2 SV=1	14.144	12	6	16	6	390	43.6	6.76	41.54	6	0	1	2.34377e+07	2.50256e+07	2.34147e+07	1.24592e+08	2.10849e+07	3.43381e+07	2.31382e+07	2.35708e+07
A5YVD9	45 kDa calcium-binding protein	SDF4	45 kDa calcium-binding protein OS=Capra hircus OX=9925 GN=SDF4 PE=2 SV=1	14.129	16	6	9	6	355	41.1	4.91	25.08	6	0	1	2.58754e+07	2.5551e+07	2.44348e+07	2.15529e+07	2.48792e+07	2.51891e+07	2.36669e+07	2.41549e+07
A0A452F4X9	Lactoylglutathione lyase	GLO1	Lactoylglutathione lyase OS=Capra hircus OX=9925 GN=GLO1 PE=3 SV=1	14.078	22	5	7	5	184	20.8	5.44	20.97	5	0	1	3.0621e+07	3.23741e+07	3.39137e+07	3.45934e+07	3.40173e+07	3.26032e+07	3.58902e+07	3.72772e+07
A0A452ESG4	Receptor for activated C kinase 1	RACK1	Receptor for activated C kinase 1 OS=Capra hircus OX=9925 GN=RACK1 PE=4 SV=1	14.063	16	5	8	5	317	35.1	7.69	22.19	5	0	1	2.31779e+07	1.64646e+07	2.29391e+07	2.80608e+07	2.19464e+07	2.58013e+07	2.2889e+07	2.38128e+07
A0A452E6K3	Beta-galactosidase-1-like protein 2	LOC102173955	Beta-galactosidase-1-like protein 2 OS=Capra hircus OX=9925 GN=LOC102173955 PE=3 SV=1	14.049	7	5	7	4	636	71.8	8.92	17.52	5	1	1	1.71903e+07	1.79494e+07	1.74892e+07	1.69853e+07	1.78339e+07	1.76658e+07	1.8087e+07	1.63936e+07
A0A452FIF2	WD repeat domain 37	WDR37	WD repeat domain 37 OS=Capra hircus OX=9925 GN=WDR37 PE=4 SV=1	14.041	9	4	8	4	510	56.2	6.96	18.2	4	0	1	1.44928e+07	1.481e+07	1.4083e+07	1.40638e+07	1.47729e+07	1.47475e+07	1.35369e+07	1.36291e+07
A0A452G5S1	NADH-cytochrome b5 reductase	CYB5R2	NADH-cytochrome b5 reductase OS=Capra hircus OX=9925 GN=CYB5R2 PE=3 SV=1	14.03	11	4	15	4	305	34.4	8.6	40.78	4	0	1	3.75622e+07	3.87299e+07	4.08975e+07	3.70496e+07	3.86865e+07	3.75969e+07	3.69759e+07	3.75894e+07
A0A452FS21	Heat shock 70 kDa protein 4 pseudogene	LOC102174037	Heat shock 70 kDa protein 4 pseudogene OS=Capra hircus OX=9925 GN=LOC102174037 PE=3 SV=1	13.956	8	6	9	1	740	83.4	5.68	23.98	6	0	1	237696	233327	265126	269302	275215	254516	323715	280239
A0A452DNZ3	Ubiquitin carboxyl-terminal hydrolase	USP2	Ubiquitin carboxyl-terminal hydrolase OS=Capra hircus OX=9925 GN=USP2 PE=3 SV=1	13.925	9	3	5	3	396	45.2	8.63	18.71	3	0	1	7.84204e+06	7.6431e+06	7.57399e+06	7.31029e+06	8.05112e+06	7.72961e+06	7.74568e+06	7.78306e+06
A0A452FE75	Leucine rich repeat containing 43	LRRC43	Leucine rich repeat containing 43 OS=Capra hircus OX=9925 GN=LRRC43 PE=4 SV=1	13.839	9	5	5	5	636	70.6	5.21	11.07	5	0	1	4.15609e+07	5.17518e+07	4.28184e+07	3.41284e+07	3.27175e+07	3.66601e+07	4.42031e+07	4.82213e+07
A0A452ELR7	Dynactin subunit 5	DCTN5	Dynactin subunit 5 OS=Capra hircus OX=9925 GN=DCTN5 PE=4 SV=1	13.815	10	2	8	2	182	20.1	8.02	23.67	2	0	1	2.13061e+07	2.18902e+07	2.14622e+07	1.80831e+07	2.12578e+07	2.31401e+07	2.11229e+07	2.06962e+07
A0A452EK39	Single-stranded DNA-binding protein, mitochondrial	SSBP1	Single-stranded DNA-binding protein, mitochondrial OS=Capra hircus OX=9925 GN=SSBP1 PE=3 SV=1	13.776	26	3	6	3	148	17.2	9.73	23.83	3	0	1	1.72639e+07	1.76819e+07	1.70266e+07	1.53783e+07	1.70238e+07	1.57163e+07	1.66601e+07	1.63542e+07
A0A452DYD2	ATP synthase subunit	LOC108638252	ATP synthase subunit OS=Capra hircus OX=9925 GN=LOC108638252 PE=3 SV=1	13.768	25	2	9	2	103	11.4	9.6	26.44	2	0	1	4.8158e+07	5.20019e+07	5.27704e+07	5.13649e+07	5.23124e+07	4.7213e+07	5.11481e+07	5.85956e+07
A0A452EPJ5	Chromosome 11 C2orf74 homolog	C2orf74	Chromosome 11 C2orf74 homolog OS=Capra hircus OX=9925 GN=C2orf74 PE=4 SV=1	13.74	21	4	6	4	185	21	5.5	20.02	4	0	1	4.52938e+07	4.55176e+07	4.43106e+07	4.13312e+07	4.67728e+07	4.81759e+07	4.5591e+07	4.61254e+07
A0A452DLT4	Centriole, cilia and spindle associated protein	CCSAP	Centriole, cilia and spindle associated protein OS=Capra hircus OX=9925 GN=CCSAP PE=4 SV=1	13.737	17	4	7	4	234	26.3	9.73	19	4	0	1	2.86822e+07	2.78924e+07	2.70055e+07	2.70892e+07	2.63481e+07	2.5172e+07	2.48338e+07	2.36141e+07
A0A452G2I4	Family with sequence similarity 221 member B	FAM221B	Family with sequence similarity 221 member B OS=Capra hircus OX=9925 GN=FAM221B PE=3 SV=1	13.71	6	2	4	2	391	44	5.07	11.74	2	0	1	5.79137e+06	5.13254e+06	5.20633e+06	4.85821e+06	5.74729e+06	6.17761e+06	5.19725e+06	5.19585e+06
A0A452FQY9	AP complex subunit sigma	AP2S1	AP complex subunit sigma OS=Capra hircus OX=9925 GN=AP2S1 PE=3 SV=1	13.666	14	3	7	3	141	16.9	6.18	16.64	3	0	1	1.64485e+07	1.70102e+07	1.75703e+07	1.48309e+07	1.76364e+07	1.61953e+07	1.76654e+07	1.78633e+07
A0A452G4N2	Chromosome 1 C3orf33 homolog	C3orf33	Chromosome 1 C3orf33 homolog OS=Capra hircus OX=9925 GN=C3orf33 PE=4 SV=1	13.652	10	3	6	3	294	34	10.04	20.55	3	0	1	7.87579e+06	9.73901e+06	7.95531e+06	9.25941e+06	8.83286e+06	8.03141e+06	7.59488e+06	8.15122e+06
A0A452FM00	Fatty acid binding protein 5	FABP5	Fatty acid binding protein 5 OS=Capra hircus OX=9925 GN=FABP5 PE=3 SV=1	13.649	24	4	32	4	135	15.1	7.69	68	4	0	1	1.92712e+08	1.94996e+08	1.76152e+08	1.7493e+08	1.89129e+08	1.74347e+08	1.90816e+08	1.80035e+08
A0A452EJ77	Chromosome 13 C20orf85 homolog	C20orf85	Chromosome 13 C20orf85 homolog OS=Capra hircus OX=9925 GN=C20orf85 PE=4 SV=1	13.647	27	4	14	4	137	15.7	8.27	32.99	4	0	1	3.64924e+07	3.09643e+07	4.10748e+07	3.53579e+07	3.87452e+07	3.82803e+07	4.1498e+07	4.66159e+07
A0A452EXW1	Cilia- and flagella-associated protein 299		Cilia- and flagella-associated protein 299 OS=Capra hircus OX=9925 PE=4 SV=1	13.628	24	3	7	3	123	14.4	9.17	17.38	3	0	1	3.84463e+07	3.9676e+07	3.89088e+07	3.47335e+07	3.75761e+07	3.50139e+07	3.74477e+07	3.8018e+07
A0A452EIU9	Cytochrome b-c1 complex subunit 6	LOC102176290	Cytochrome b-c1 complex subunit 6 OS=Capra hircus OX=9925 GN=LOC102176290 PE=3 SV=1	13.605	37	3	6	3	91	10.7	4.5	13.98	3	0	1	1.65916e+07	1.51018e+07	1.64813e+07	2.15151e+07	1.70879e+07	1.96512e+07	1.67172e+07	1.72454e+07
A0A452EN49	Heterogeneous nuclear ribonucleoprotein K	HNRNPK	Heterogeneous nuclear ribonucleoprotein K OS=Capra hircus OX=9925 GN=HNRNPK PE=4 SV=1	13.602	8	4	4	4	440	48.5	5.45	13.5	4	0	1	7.82455e+06	7.53005e+06	6.42049e+06	6.48228e+06	7.58563e+06	8.68044e+06	6.64755e+06	7.1703e+06
A0A452FW59	Spermatid maturation 1	SPEM1	Spermatid maturation 1 OS=Capra hircus OX=9925 GN=SPEM1 PE=4 SV=1	13.595	9	2	4	2	313	35.3	9.32	13.05	2	0	1	3.37864e+07	3.2376e+07	3.2831e+07	2.8725e+07	3.33445e+07	3.46349e+07	3.42683e+07	3.20254e+07
A0A452EGM2	Chromosome 11 C2orf81 homolog	C11H2orf81	Chromosome 11 C2orf81 homolog OS=Capra hircus OX=9925 GN=C11H2orf81 PE=4 SV=1	13.579	11	4	7	4	504	54.6	4.94	19.87	4	0	1	4.09034e+07	4.30421e+07	4.40472e+07	4.04842e+07	4.24512e+07	4.19236e+07	4.27913e+07	4.49594e+07
A0A452EK38	V-type proton ATPase subunit a	ATP6V0A2	V-type proton ATPase subunit a OS=Capra hircus OX=9925 GN=ATP6V0A2 PE=3 SV=1	13.563	5	4	4	3	854	98	6.4	11.51	4	1	1	1.20733e+07	1.28392e+07	1.21329e+07	1.1542e+07	1.29551e+07	1.21301e+07	1.28046e+07	1.20823e+07
A0A452G029	HSPA (Hsp70) binding protein 1	HSPBP1	HSPA (Hsp70) binding protein 1 OS=Capra hircus OX=9925 GN=HSPBP1 PE=4 SV=1	13.548	8	3	7	3	357	39.1	5.08	18.31	3	0	1	1.53681e+07	1.51611e+07	1.56565e+07	1.4174e+07	1.53792e+07	1.55602e+07	1.61134e+07	1.6107e+07
A0A452G899	DnaJ heat shock protein family (Hsp40) member C5	DNAJC5	DnaJ heat shock protein family (Hsp40) member C5 OS=Capra hircus OX=9925 GN=DNAJC5 PE=4 SV=1	13.53	19	3	12	3	198	22.1	5.07	40.98	3	0	1	5.48846e+07	5.68062e+07	5.4087e+07	5.08617e+07	5.51686e+07	4.76843e+07	5.50288e+07	5.20397e+07
A0A452EZV6	Solute carrier family 25 member 41	SLC25A41	Solute carrier family 25 member 41 OS=Capra hircus OX=9925 GN=SLC25A41 PE=3 SV=1	13.523	14	5	15	5	308	33.8	9.13	39.21	5	0	1	4.19719e+07	4.89213e+07	4.43668e+07	4.07935e+07	4.45673e+07	4.33581e+07	4.38672e+07	4.46489e+07
A0A452EX06	Spermatogenesis associated 24	SPATA24	Spermatogenesis associated 24 OS=Capra hircus OX=9925 GN=SPATA24 PE=4 SV=1	13.52	13	2	2	2	205	23.7	7.97	10.46	2	0	1	5.13244e+06	5.64385e+06	5.33219e+06	4.82211e+06	6.08842e+06	5.57952e+06	5.46133e+06	5.5582e+06
A0A452EJ98	Peptidyl-prolyl cis-trans isomerase	PPIL1	Peptidyl-prolyl cis-trans isomerase OS=Capra hircus OX=9925 GN=PPIL1 PE=3 SV=1	13.503	25	3	3	3	166	18.3	8	10.62	3	0	1	6.169e+06	6.78512e+06	6.23144e+06	5.80306e+06	6.44085e+06	5.96582e+06	6.25824e+06	5.81575e+06
A0A452FT95	Membrane associated ring-CH-type finger 10	MARCHF10	Membrane associated ring-CH-type finger 10 OS=Capra hircus OX=9925 GN=MARCHF10 PE=4 SV=1	13.49	3	2	7	2	824	91.6	7.36	26.25	2	0	1	1.24758e+07	1.28518e+07	1.27221e+07	1.12321e+07	1.3414e+07	1.28022e+07	1.32593e+07	1.3969e+07
A0A452G6N0	Presenilin associated rhomboid like	PARL	Presenilin associated rhomboid like OS=Capra hircus OX=9925 GN=PARL PE=4 SV=1	13.484	8	3	9	3	366	41.1	9.73	23.61	3	0	1	7.14755e+07	7.41744e+07	7.77709e+07	7.05134e+07	7.19549e+07	7.386e+07	7.83495e+07	8.05695e+07
A0A452FQI4	Clathrin heavy chain linker domain-containing protein 1	CLHC1	Clathrin heavy chain linker domain-containing protein 1 OS=Capra hircus OX=9925 GN=CLHC1 PE=4 SV=1	13.482	5	3	4	3	586	67.3	6.49	12.35	3	0	1	1.26063e+07	1.38487e+07	1.28183e+07	1.23072e+07	1.28557e+07	1.28712e+07	1.25315e+07	1.30414e+07
A0A452FFP6	Beta-mannosidase	MANBA	Beta-mannosidase OS=Capra hircus OX=9925 GN=MANBA PE=3 SV=1	13.479	4	4	6	4	879	101.3	6.47	17.77	4	0	1	1.98517e+07	1.9744e+07	1.86627e+07	1.75481e+07	2.04321e+07	2.23384e+07	1.89317e+07	1.86635e+07
A0A452E855	40S ribosomal protein S6	LOC102171417	40S ribosomal protein S6 OS=Capra hircus OX=9925 GN=LOC102171417 PE=3 SV=1	13.46	12	3	5	3	249	28.5	10.46	14.32	3	0	1	6.88382e+06	7.2807e+06	6.80016e+06	1.20236e+07	7.16781e+06	7.49623e+06	6.62109e+06	6.80269e+06
A0A452EB57	Proteasome subunit beta	PSMB3	Proteasome subunit beta OS=Capra hircus OX=9925 GN=PSMB3 PE=3 SV=1	13.442	22	4	5	4	205	23	6.55	16	4	0	1	3.57439e+07	4.03786e+07	3.85579e+07	3.52771e+07	3.47578e+07	3.60868e+07	4.14422e+07	4.01535e+07
A0A452FBC5	Solute carrier family 9 member C1	SLC9C1	Solute carrier family 9 member C1 OS=Capra hircus OX=9925 GN=SLC9C1 PE=3 SV=1	13.374	4	5	11	5	1153	133.1	7.9	28.15	5	0	1	2.83556e+07	3.16447e+07	2.7646e+07	2.47133e+07	2.95192e+07	3.07436e+07	2.786e+07	2.79881e+07
A0A452FXT4	N-acyl phosphatidylethanolamine phospholipase D	NAPEPLD	N-acyl phosphatidylethanolamine phospholipase D OS=Capra hircus OX=9925 GN=NAPEPLD PE=4 SV=1	13.369	9	5	9	5	466	53.9	8.47	26.14	5	0	1	3.15894e+07	5.87802e+07	3.19449e+07	3.41964e+07	3.66951e+07	3.19005e+07	3.26412e+07	3.23609e+07
A0A452G696	Prominin 1	PROM1	Prominin 1 OS=Capra hircus OX=9925 GN=PROM1 PE=3 SV=1	13.367	4	4	9	4	855	96.5	7.09	28.6	4	0	1	3.08947e+07	3.18322e+07	2.92448e+07	2.6274e+07	2.89887e+07	2.69355e+07	2.90097e+07	2.70478e+07
A0A452FCU2	Farnesyl diphosphate synthase	FDPS	Farnesyl diphosphate synthase OS=Capra hircus OX=9925 GN=FDPS PE=3 SV=1	13.243	11	5	5	5	353	40.4	5.11	14.15	5	0	1	1.27544e+07	1.60434e+07	1.27437e+07	1.25791e+07	1.2734e+07	1.27357e+07	1.24654e+07	1.34509e+07
A0A452FUK8	RUN domain containing 3A	RUNDC3A	RUN domain containing 3A OS=Capra hircus OX=9925 GN=RUNDC3A PE=4 SV=1	13.242	6	3	4	3	441	49.4	5.43	12.71	3	0	1	2.67624e+06	4.82499e+06	2.63023e+06	2.92617e+06	3.00416e+06	2.81617e+06	2.57068e+06	2.67812e+06
A0A452FAD3	Glyoxylate and hydroxypyruvate reductase	GRHPR	Glyoxylate and hydroxypyruvate reductase OS=Capra hircus OX=9925 GN=GRHPR PE=3 SV=1	13.137	9	3	7	3	328	35.7	7.39	18.5	3	0	1	1.76913e+07	1.78513e+07	1.84202e+07	1.82581e+07	1.78011e+07	1.69116e+07	1.87862e+07	1.86743e+07
A0A452DNJ3	Phosphatidate cytidylyltransferase, mitochondrial	LOC108633367	Phosphatidate cytidylyltransferase, mitochondrial OS=Capra hircus OX=9925 GN=LOC108633367 PE=3 SV=1	13.107	10	4	9	4	337	37.5	8.91	23.58	4	0	1	2.1272e+07	2.27532e+07	2.32226e+07	2.22611e+07	2.32228e+07	2.13608e+07	2.36004e+07	2.38799e+07
A0A452EWZ3	Serpin A3-5	LOC102174166	Serpin A3-5 OS=Capra hircus OX=9925 GN=LOC102174166 PE=3 SV=1	13.073	5	3	10	3	498	55	6.15	25.87	3	0	1	3.67174e+07	3.6188e+07	3.08631e+07	3.55463e+07	3.95984e+07	3.70175e+07	3.13337e+07	3.13217e+07
A0A452DVG8	Protein disulfide-isomerase A6	PDIA6	Protein disulfide-isomerase A6 OS=Capra hircus OX=9925 GN=PDIA6 PE=3 SV=1	13.008	10	4	7	4	440	48.1	5.1	11.68	4	0	1	5.15543e+07	5.65741e+07	4.48835e+07	4.26943e+07	4.61285e+07	5.08239e+07	4.94277e+07	3.99074e+07
A0A452DSD1	SURF1-like protein	SURF1	SURF1-like protein OS=Capra hircus OX=9925 GN=SURF1 PE=3 SV=1	13.002	14	4	6	4	340	37.6	10.02	18.14	4	0	1	7.25459e+06	8.03258e+06	7.49923e+06	1.07243e+07	8.30965e+06	7.37979e+06	7.21817e+06	7.68232e+06
A0A452DSH6	Diacylglycerol kinase	DGKH	Diacylglycerol kinase OS=Capra hircus OX=9925 GN=DGKH PE=3 SV=1	12.99	4	4	4	4	1159	127.8	6.37	12.09	4	0	1	4.81531e+06	4.13847e+06	4.18135e+06	3.55302e+06	4.64715e+06	4.72368e+06	5.07437e+06	3.83594e+06
A0A452EID3	Sulfurtransferase	TSTD3	Sulfurtransferase OS=Capra hircus OX=9925 GN=TSTD3 PE=4 SV=1	12.938	19	2	5	2	159	18	8.88	18.6	2	0	1	1.03988e+07	1.2353e+07	1.02936e+07	9.79927e+06	1.06549e+07	1.00359e+07	1.03219e+07	9.73708e+06
A0A452F593	Polyamine modulated factor 1 binding protein 1	PMFBP1	Polyamine modulated factor 1 binding protein 1 OS=Capra hircus OX=9925 GN=PMFBP1 PE=4 SV=1	12.85	4	4	6	4	921	107.7	6.74	18.22	4	0	1	1.58198e+07	1.60769e+07	1.47535e+07	1.40694e+07	1.525e+07	1.96021e+07	1.59132e+07	1.5421e+07
A0A452DJZ6	Carnosine dipeptidase 2	CNDP2	Carnosine dipeptidase 2 OS=Capra hircus OX=9925 GN=CNDP2 PE=3 SV=1	12.836	13	6	10	6	475	52.7	5.67	22.87	6	0	1	2.52668e+07	3.02113e+07	2.37272e+07	2.52436e+07	2.48291e+07	2.55768e+07	2.39638e+07	2.45425e+07
A0A452DTY7	Mitochondrial trans-2-enoyl-CoA reductase	MECR	Mitochondrial trans-2-enoyl-CoA reductase OS=Capra hircus OX=9925 GN=MECR PE=4 SV=1	12.825	14	5	5	5	377	40.4	8.51	11.79	5	0	1	1.21235e+07	1.37515e+07	1.23358e+07	1.25689e+07	1.29032e+07	1.21448e+07	1.2443e+07	1.23576e+07
A0A452F0G8	Leukotriene A(4) hydrolase	LTA4H	Leukotriene A(4) hydrolase OS=Capra hircus OX=9925 GN=LTA4H PE=3 SV=1	12.791	6	3	4	3	611	69.2	6.32	9.63	3	0	1	1.1975e+07	1.1232e+07	1.17199e+07	9.45194e+06	1.24756e+07	1.31271e+07	1.31873e+07	1.28318e+07
A0A452EYH6	Lactotransferrin	LTF	Lactotransferrin OS=Capra hircus OX=9925 GN=LTF PE=3 SV=1	12.759	6	5	5	5	708	77.3	8.02	8.76	5	0	1	1.50984e+07	1.62501e+07	1.44647e+07	1.44256e+07	1.61934e+07	1.59509e+07	1.59525e+07	1.60899e+07
A0A452ELU5	Serpin B6	LOC102178679	Serpin B6 OS=Capra hircus OX=9925 GN=LOC102178679 PE=3 SV=1	12.755	11	4	8	4	378	42.5	5.43	24.73	4	0	1	3.88313e+07	3.82182e+07	4.10427e+07	3.67051e+07	4.02814e+07	4.68054e+07	4.38338e+07	4.34406e+07
A0A452F550	Proteasome 26S subunit, non-ATPase 7	PSMD7	Proteasome 26S subunit, non-ATPase 7 OS=Capra hircus OX=9925 GN=PSMD7 PE=3 SV=1	12.732	13	4	4	4	322	36.7	6.77	10.59	4	0	1	1.70711e+07	1.68479e+07	1.93254e+07	1.95427e+07	1.82768e+07	1.67488e+07	2.03947e+07	2.03025e+07
A0A452FHL1	Sperm acrosome-associated protein 5	LOC102179274	Sperm acrosome-associated protein 5 OS=Capra hircus OX=9925 GN=LOC102179274 PE=3 SV=1	12.728	6	1	14	1	156	17.6	5.88	40.73	1	0	1	6.9598e+07	6.86539e+07	6.59624e+07	8.09395e+07	7.15314e+07	7.08392e+07	6.4359e+07	6.91707e+07
A0A452G6M6	Cytochrome b-c1 complex subunit 9	LOC102187154	Cytochrome b-c1 complex subunit 9 OS=Capra hircus OX=9925 GN=LOC102187154 PE=3 SV=1	12.724	27	1	6	1	64	7.5	9.19	31.88	1	0	1	8.85534e+06	9.17379e+06	9.31415e+06	1.18415e+07	9.91393e+06	1.34989e+07	8.7613e+06	1.01488e+07
A0A452DKC0			Uncharacterized protein OS=Capra hircus OX=9925 PE=4 SV=1	12.689	23	5	10	5	155	18.6	9.48	30.38	5	0	1	4.08674e+07	4.59848e+07	4.03858e+07	3.36152e+07	4.27451e+07	4.49021e+07	4.20646e+07	4.14343e+07
A0A452DUR7	Acyl-peptide hydrolase	APEH	Acyl-peptide hydrolase OS=Capra hircus OX=9925 GN=APEH PE=4 SV=1	12.662	5	5	6	5	730	80.9	5.48	16.41	5	0	1	1.71222e+07	4.17324e+07	1.81974e+07	2.3055e+07	2.08172e+07	1.77032e+07	2.0152e+07	2.13676e+07
A0A452GAT7	Coiled-coil domain containing 42	CCDC42	Coiled-coil domain containing 42 OS=Capra hircus OX=9925 GN=CCDC42 PE=4 SV=1	12.62	12	4	10	4	316	37.8	9.16	35.02	4	0	1	1.57943e+07	1.62935e+07	1.5249e+07	1.85879e+07	1.60485e+07	1.39879e+07	1.36582e+07	1.4181e+07
A0A452DQE6	Dipeptidyl peptidase 3	DPP3	Dipeptidyl peptidase 3 OS=Capra hircus OX=9925 GN=DPP3 PE=3 SV=1	12.57	5	4	6	4	731	81.9	5.19	17.96	4	0	1	9.56356e+06	1.01431e+07	9.73843e+06	9.47559e+06	9.58598e+06	1.02808e+07	9.97933e+06	1.02962e+07
A0A452FU31	Centrosome and spindle pole associated protein 1	CSPP1	Centrosome and spindle pole associated protein 1 OS=Capra hircus OX=9925 GN=CSPP1 PE=4 SV=1	12.54	3	3	4	3	1193	138.4	6.24	14.95	3	0	1	1.02072e+07	3.43969e+06	9.67353e+06	3.10402e+06	8.77483e+06	1.12305e+07	9.65733e+06	9.7956e+06
A0A452FD60	Phosphorylase kinase	PHKG2	Phosphorylase kinase OS=Capra hircus OX=9925 GN=PHKG2 PE=3 SV=1	12.495	6	2	4	2	406	46.5	6.15	10.34	2	0	1	6.85997e+06	6.86425e+06	6.95881e+06	6.32347e+06	6.90516e+06	6.69207e+06	6.79591e+06	6.82996e+06
A0A452EIJ8	Elongation factor Ts, mitochondrial	TSFM	Elongation factor Ts, mitochondrial OS=Capra hircus OX=9925 GN=TSFM PE=3 SV=1	12.462	13	4	7	4	319	34.7	7.47	22.99	4	0	1	2.25615e+07	2.06619e+07	2.06271e+07	1.82421e+07	2.1005e+07	2.15692e+07	2.03881e+07	2.07229e+07
A0A452EZD8	Arginase	ARG2	Arginase OS=Capra hircus OX=9925 GN=ARG2 PE=3 SV=1	12.432	11	3	7	3	354	38.5	6.35	21.55	3	0	1	1.71423e+07	1.66886e+07	1.67491e+07	1.40317e+07	1.70865e+07	1.86197e+07	1.72839e+07	1.68509e+07
A0A452FHC1	Arginine--tRNA ligase, cytoplasmic	RARS1	Arginine--tRNA ligase, cytoplasmic OS=Capra hircus OX=9925 GN=RARS1 PE=3 SV=1	12.418	7	5	5	5	660	75.6	6.96	15.77	5	0	1	1.28612e+07	1.44974e+07	1.24589e+07	1.17091e+07	1.36657e+07	1.39484e+07	1.28476e+07	1.26888e+07
A0A452FLB4	Arginase	ARG1	Arginase OS=Capra hircus OX=9925 GN=ARG1 PE=3 SV=1	12.382	14	4	7	4	313	34.2	6.62	14.11	4	0	1	1.52444e+07	1.52845e+07	1.50905e+07	1.0756e+07	1.28311e+07	1.68406e+07	1.58736e+07	1.55903e+07
A0A452EAM2			Uncharacterized protein OS=Capra hircus OX=9925 PE=4 SV=1	12.376	9	2	6	2	268	30.9	7.05	18.62	2	0	1	1.22461e+07	1.30261e+07	1.29423e+07	1.19e+07	1.30925e+07	1.33217e+07	1.25985e+07	1.345e+07
A0A452FVD5	Leucine zipper transcription factor-like protein 1	LZTFL1	Leucine zipper transcription factor-like protein 1 OS=Capra hircus OX=9925 GN=LZTFL1 PE=3 SV=1	12.353	16	4	5	4	302	34.9	5.31	16.81	4	0	1	8.6316e+06	8.8828e+06	8.30704e+06	8.59207e+06	1.014e+07	9.45384e+06	8.35758e+06	8.05389e+06
A0A452E5T7			Uncharacterized protein OS=Capra hircus OX=9925 PE=4 SV=1	12.308	32	4	22	4	118	13.3	10.48	44.62	4	0	1	2.29968e+08	2.41464e+08	2.77592e+08	2.62564e+08	2.65797e+08	2.38456e+08	2.63605e+08	2.87264e+08
A0A452F3T6	CFAP97 domain containing 1	CFAP97D1	CFAP97 domain containing 1 OS=Capra hircus OX=9925 GN=CFAP97D1 PE=3 SV=1	12.308	24	4	8	4	164	19.5	10.1	21.25	4	0	1	2.29856e+07	2.68689e+07	2.3566e+07	2.80028e+07	2.12421e+07	2.53306e+07	2.30536e+07	2.56443e+07
A0A452FYJ5	Dynactin subunit 1	DCTN1	Dynactin subunit 1 OS=Capra hircus OX=9925 GN=DCTN1 PE=3 SV=1	12.303	5	6	7	6	1262	139.4	5.57	13.03	6	0	1	2.26836e+07	2.49953e+07	2.4231e+07	2.26651e+07	2.45046e+07	2.34864e+07	2.63849e+07	2.72173e+07
A0A452ERG7	SEC61 translocon alpha 2 subunit	SEC61A2	SEC61 translocon alpha 2 subunit OS=Capra hircus OX=9925 GN=SEC61A2 PE=3 SV=1	12.291	6	3	7	3	476	52.2	8.06	20.87	3	0	1	1.33677e+07	1.31836e+07	1.29688e+07	1.24527e+07	1.24735e+07	1.26795e+07	1.33551e+07	1.38525e+07
A0A452FU48	LRP2 binding protein	LRP2BP	LRP2 binding protein OS=Capra hircus OX=9925 GN=LRP2BP PE=4 SV=1	12.273	10	3	5	3	348	39.9	8.27	13.41	3	0	1	2.51313e+07	2.46139e+07	2.5184e+07	2.57477e+07	2.61702e+07	2.70287e+07	2.55333e+07	2.67832e+07
A0A452F4U9	IZUMO family member 3	IZUMO3	IZUMO family member 3 OS=Capra hircus OX=9925 GN=IZUMO3 PE=3 SV=1	12.231	12	4	11	4	240	27.8	8.62	27.98	4	0	1	5.25019e+07	5.28197e+07	5.53725e+07	5.60993e+07	5.8542e+07	5.00507e+07	6.5231e+07	5.67107e+07
A0A452G2T8	Acylphosphatase-like domain-containing protein		Acylphosphatase-like domain-containing protein OS=Capra hircus OX=9925 PE=3 SV=1	12.231	24	2	7	2	90	9.5	9.88	19.58	2	0	1	1.51506e+07	1.65173e+07	1.6878e+07	1.71249e+07	1.65838e+07	1.49806e+07	1.53336e+07	1.6982e+07
A0A452G587	Profilin	PFN1	Profilin OS=Capra hircus OX=9925 GN=PFN1 PE=3 SV=1	12.218	26	3	3	3	140	15	8.28	11.14	3	0	1	1.43795e+07	1.32246e+07	1.37615e+07	1.41794e+07	1.42466e+07	1.50682e+07	1.53631e+07	1.40416e+07
A0A452DZ54	Delta-1-pyrroline-5-carboxylate synthase	ALDH18A1	Delta-1-pyrroline-5-carboxylate synthase OS=Capra hircus OX=9925 GN=ALDH18A1 PE=3 SV=1	12.189	6	5	6	5	795	87.2	7.3	14.56	5	0	1	1.08508e+07	1.08362e+07	9.78613e+06	9.93631e+06	1.09868e+07	1.22566e+07	9.34119e+06	9.52276e+06
A0A452G713	Mitochondrial ribosome recycling factor	MRRF	Mitochondrial ribosome recycling factor OS=Capra hircus OX=9925 GN=MRRF PE=3 SV=1	12.095	9	2	4	2	262	29	9.66	13.2	2	0	1	1.57233e+07	1.7914e+07	1.73801e+07	1.65961e+07	1.6791e+07	1.5444e+07	1.65729e+07	1.72528e+07
A0A452EMC8	Amine oxidase	MAOA	Amine oxidase OS=Capra hircus OX=9925 GN=MAOA PE=3 SV=1	12.013	10	4	5	4	432	49.5	7.52	16.01	4	0	1	9.3989e+06	1.10393e+07	9.73496e+06	9.4827e+06	1.00388e+07	9.93904e+06	9.84342e+06	1.00934e+07
A0A452ET68	Mitochondrial import inner membrane translocase subunit TIM22	TIMM22	Mitochondrial import inner membrane translocase subunit TIM22 OS=Capra hircus OX=9925 GN=TIMM22 PE=3 SV=1	12.012	8	1	2	1	194	20.2	8.22	8.17	1	0	1	7.45734e+06	8.04855e+06	8.07069e+06	6.68418e+06	7.93813e+06	8.09123e+06	8.03704e+06	8.23715e+06
A0A452DRZ8	Alcohol dehydrogenase [NADP(+)]	AKR1A1	Alcohol dehydrogenase [NADP(+)] OS=Capra hircus OX=9925 GN=AKR1A1 PE=3 SV=1	11.975	10	4	6	3	325	36.5	7.27	15.64	4	0	1	9.12869e+06	9.33742e+06	9.55273e+06	1.15221e+07	1.02855e+07	1.0599e+07	9.62137e+06	9.50128e+06
A0A452E004	BCL2-associated athanogene 6	BAG6	BCL2-associated athanogene 6 OS=Capra hircus OX=9925 GN=BAG6 PE=4 SV=1	11.96	4	4	6	4	1146	120.3	5.69	20.14	4	0	1	1.25795e+07	1.33528e+07	1.37659e+07	1.27838e+07	1.33343e+07	1.37111e+07	1.44605e+07	1.45639e+07
A0A452EJV7	Ubiquitin thioesterase OTU1	YOD1	Ubiquitin thioesterase OTU1 OS=Capra hircus OX=9925 GN=YOD1 PE=4 SV=1	11.895	10	4	9	4	348	37.8	6.01	16.58	4	0	1	1.69871e+07	1.67988e+07	1.6702e+07	1.44197e+07	1.65147e+07	1.67362e+07	1.81756e+07	1.66659e+07
A0A452FT07	SRSF protein kinase 2	SRPK2	SRSF protein kinase 2 OS=Capra hircus OX=9925 GN=SRPK2 PE=4 SV=1	11.847	5	4	9	4	697	78.9	5.26	23.32	4	0	1	2.15296e+07	2.29934e+07	2.21675e+07	2.10343e+07	2.20531e+07	2.32733e+07	2.23926e+07	2.32263e+07
A0A452FQM9	Complex I-B12	NDUFB3	Complex I-B12 OS=Capra hircus OX=9925 GN=NDUFB3 PE=3 SV=1	11.799	12	1	11	1	98	11.1	9.23	40.29	1	0	1	7.93786e+06	8.33881e+06	8.0468e+06	1.23487e+07	9.15647e+06	1.13567e+07	7.60124e+06	9.16643e+06
A0A452FYZ4	Ornithine decarboxylase antizyme 3	OAZ3	Ornithine decarboxylase antizyme 3 OS=Capra hircus OX=9925 GN=OAZ3 PE=3 SV=1	11.796	9	2	39	2	245	28.4	8.63	129.69	2	0	1	2.46584e+08	2.58194e+08	2.76187e+08	2.57579e+08	2.63473e+08	2.62808e+08	2.68097e+08	2.93505e+08
A0A452FZZ4	DNA polymerase delta interacting protein 2	POLDIP2	DNA polymerase delta interacting protein 2 OS=Capra hircus OX=9925 GN=POLDIP2 PE=4 SV=1	11.791	11	3	3	3	361	40.9	8.63	12.08	3	0	1	2.28272e+06	2.58046e+06	2.18969e+06	2.18035e+06	2.23283e+06	2.31158e+06	2.23482e+06	2.36057e+06
A0A452G9U0	RAB35, member RAS oncogene family	RAB35	RAB35, member RAS oncogene family OS=Capra hircus OX=9925 GN=RAB35 PE=4 SV=1	11.79	12	2	7	1	183	21	8.51	23.41	2	0	1	1.07682e+06	1.03582e+06	1.06574e+06	1.00324e+06	1.06577e+06	1.15683e+06	1.01767e+06	1.08322e+06
A0A452DT72	Histone H2B subacrosomal variant	LOC102175243	Histone H2B subacrosomal variant OS=Capra hircus OX=9925 GN=LOC102175243 PE=3 SV=1	11.773	17	2	6	2	122	14.2	10.13	17.05	2	0	1	3.38546e+07	3.38612e+07	3.07574e+07	2.57674e+07	3.39853e+07	3.77819e+07	3.14531e+07	2.93803e+07
A0A452DZ17	Coiled-coil-helix-coiled-coil-helix domain containing 6	CHCHD6	Coiled-coil-helix-coiled-coil-helix domain containing 6 OS=Capra hircus OX=9925 GN=CHCHD6 PE=4 SV=1	11.733	11	4	6	4	376	40.3	9.33	12.85	4	0	1	2.13109e+07	1.78535e+07	2.0476e+07	1.75574e+07	2.29388e+07	1.96065e+07	2.05208e+07	1.92431e+07
A0A452DP90	Protein lin-7 homolog	LIN7A	Protein lin-7 homolog OS=Capra hircus OX=9925 GN=LIN7A PE=3 SV=1	11.654	10	2	4	2	233	26	8.72	10.74	2	0	1	1.16996e+07	1.16343e+07	1.2118e+07	1.08192e+07	1.15878e+07	1.17753e+07	1.19464e+07	1.15287e+07
A0A452F7W2	Ubiquitin carboxyl-terminal hydrolase isozyme L1	UCHL1	Ubiquitin carboxyl-terminal hydrolase isozyme L1 OS=Capra hircus OX=9925 GN=UCHL1 PE=3 SV=1	11.64	13	3	8	3	248	27.8	5.49	25.37	3	0	1	1.00278e+07	1.00317e+07	1.02866e+07	9.5033e+06	1.01646e+07	1.0472e+07	1.05558e+07	1.10336e+07
A0A452F3B8	T-complex 11	TCP11	T-complex 11 OS=Capra hircus OX=9925 GN=TCP11 PE=3 SV=1	11.639	7	4	8	2	507	56.9	6.27	29.85	4	2	1	3.13693e+07	3.02955e+07	3.27412e+07	2.85883e+07	3.19622e+07	3.0449e+07	3.23465e+07	3.11455e+07
A0A452EWN3	Ubiquitin conjugating enzyme E2 M	UBE2M	Ubiquitin conjugating enzyme E2 M OS=Capra hircus OX=9925 GN=UBE2M PE=3 SV=1	11.635	15	3	8	3	183	20.9	7.69	14.37	3	0	1	2.3337e+07	2.39131e+07	2.41166e+07	2.30092e+07	2.38829e+07	2.46239e+07	2.38665e+07	2.39433e+07
A0A452EUZ8	TLC domain containing 3A	TLCD3A	TLC domain containing 3A OS=Capra hircus OX=9925 GN=TLCD3A PE=4 SV=1	11.635	12	4	11	4	258	29.8	9.54	24.3	4	0	1	5.71642e+07	5.67815e+07	5.4967e+07	5.33861e+07	4.41749e+07	5.60799e+07	5.84116e+07	6.23323e+07
A0A452FGW2	NFU1 iron-sulfur cluster scaffold homolog, mitochondrial	NFU1	NFU1 iron-sulfur cluster scaffold homolog, mitochondrial OS=Capra hircus OX=9925 GN=NFU1 PE=3 SV=1	11.633	11	2	2	2	247	27.6	5.07	8.86	2	0	1	755187	948380	732638	681425	763146	674452	695544	696066
A0A452GBH4	DnaJ homolog subfamily A member 2 pseudogene	LOC108637643	DnaJ homolog subfamily A member 2 pseudogene OS=Capra hircus OX=9925 GN=LOC108637643 PE=3 SV=1	11.63	10	3	8	3	406	45.2	6.48	20.4	3	0	1	1.03573e+07	1.03007e+07	1.06226e+07	1.00232e+07	1.09734e+07	1.08051e+07	1.0401e+07	1.06316e+07
A0A452G852	Chromosome 5 C12orf10 homolog	MYG1	Chromosome 5 C12orf10 homolog OS=Capra hircus OX=9925 GN=MYG1 PE=3 SV=1	11.558	8	2	4	2	381	42.8	6.71	15.76	2	0	1	6.36804e+06	6.2273e+06	6.37627e+06	5.78961e+06	6.25396e+06	6.70339e+06	6.7052e+06	6.63363e+06
A0A452FPV9	Abhydrolase domain containing 11	ABHD11	Abhydrolase domain containing 11 OS=Capra hircus OX=9925 GN=ABHD11 PE=4 SV=1	11.475	9	2	2	2	303	33.3	9.98	8.69	2	0	1	1.54584e+06	1.63502e+06	1.55447e+06	1.79955e+06	1.7757e+06	1.43504e+06	1.65297e+06	1.85839e+06
A0A452FZ36	Serine/threonine/tyrosine interacting like 1	STYXL1	Serine/threonine/tyrosine interacting like 1 OS=Capra hircus OX=9925 GN=STYXL1 PE=4 SV=1	11.46	6	2	5	2	314	35.8	6.52	19.66	2	0	1	4.55766e+07	4.67897e+07	4.80884e+07	3.96903e+07	4.67604e+07	4.90827e+07	4.84082e+07	4.90566e+07
A0A452FD27	Phosphodiesterase	PDE4A	Phosphodiesterase OS=Capra hircus OX=9925 GN=PDE4A PE=3 SV=1	11.436	3	2	3	2	877	96.6	5.19	11.1	2	0	1	5.6792e+06	5.48557e+06	5.64067e+06	4.9924e+06	5.5574e+06	5.5228e+06	5.90866e+06	5.55299e+06
A0A452FN69	Amine oxidase	LOC108634360	Amine oxidase OS=Capra hircus OX=9925 GN=LOC108634360 PE=3 SV=1	11.394	13	2	13	2	195	22.5	8.76	37.01	2	0	1	1.88798e+07	1.86765e+07	1.85718e+07	2.26188e+07	1.90458e+07	2.07487e+07	1.73132e+07	1.76096e+07
A0A452EZC4	FMR1 autosomal homolog 1	FXR1	FMR1 autosomal homolog 1 OS=Capra hircus OX=9925 GN=FXR1 PE=3 SV=1	11.385	6	3	6	3	648	73.1	6.83	21.3	3	0	1	2.02464e+07	2.00886e+07	2.00305e+07	1.86996e+07	2.06569e+07	2.20868e+07	1.92033e+07	1.94569e+07
A0A452E779			Uncharacterized protein OS=Capra hircus OX=9925 PE=4 SV=1	11.36	6	4	7	4	663	73.7	9.54	19.56	4	0	1	1.18353e+07	1.23563e+07	1.22548e+07	1.13604e+07	1.26355e+07	1.21599e+07	1.27407e+07	1.18051e+07
A0A452FUI2	Keratin 18	KRT18	Keratin 18 OS=Capra hircus OX=9925 GN=KRT18 PE=3 SV=1	11.357	8	4	15	1	424	47.3	5.31	42.99	4	0	1	4.82417e+07	3.92073e+07	5.03693e+07	3.97207e+07	5.88345e+07	6.50342e+07	5.23624e+07	4.52877e+07
G1DG74	Dynactin subunit 6	DCTN6	Dynactin subunit 6 OS=Capra hircus OX=9925 GN=DCTN6 PE=2 SV=1	11.356	9	2	8	2	190	20.6	6.32	16.87	2	0	1	4.09959e+07	3.72116e+07	3.57768e+07	3.56565e+07	3.69239e+07	4.20269e+07	3.29119e+07	3.1747e+07
A0A452G1T2	Maestro heat like repeat family member 7	MROH7	Maestro heat like repeat family member 7 OS=Capra hircus OX=9925 GN=MROH7 PE=4 SV=1	11.348	4	4	5	4	892	99.8	8.48	12.5	4	0	1	8.55247e+06	9.40827e+06	8.55267e+06	6.56874e+06	8.57872e+06	8.48632e+06	8.73469e+06	8.75104e+06
A0A452E5L4	Beta-defensin 130-like	LOC108634084	Beta-defensin 130-like OS=Capra hircus OX=9925 GN=LOC108634084 PE=4 SV=1	11.336	24	1	3	1	79	8.9	9.63	17.87	1	0	1	2.24157e+06	1.82363e+06	1.69423e+06	3.54087e+06	1.93843e+06	1.91897e+06	1.79233e+06	1.66228e+06
A0A452E7Q2	Eukaryotic translation initiation factor 6	EIF6	Eukaryotic translation initiation factor 6 OS=Capra hircus OX=9925 GN=EIF6 PE=3 SV=1	11.317	13	2	7	2	245	26.5	4.72	8.03	2	0	1	1.00843e+07	9.28516e+06	9.3622e+06	8.50555e+06	9.54492e+06	1.04953e+07	1.00064e+07	8.87807e+06
A0A452DU41	Protein phosphatase 1 regulatory inhibitor subunit 2	PPP1R2	Protein phosphatase 1 regulatory inhibitor subunit 2 OS=Capra hircus OX=9925 GN=PPP1R2 PE=3 SV=1	11.309	14	2	3	2	207	23	4.73	9.3	2	0	1	2.86409e+06	3.03916e+06	2.80365e+06	2.80323e+06	2.86381e+06	3.04522e+06	2.89334e+06	2.87097e+06
A0A452EN27	COP9 signalosome complex subunit 4	COPS4	COP9 signalosome complex subunit 4 OS=Capra hircus OX=9925 GN=COPS4 PE=3 SV=1	11.274	7	3	4	3	406	46.3	5.83	14.4	3	0	1	5.51199e+06	5.0983e+06	5.40275e+06	5.32815e+06	5.44695e+06	5.29485e+06	5.32252e+06	5.15908e+06
A0A452EW54	Chromosome segregation 1-like protein	CSE1L	Chromosome segregation 1-like protein OS=Capra hircus OX=9925 GN=CSE1L PE=3 SV=1	11.251	3	3	4	3	971	110.3	5.77	10.84	3	0	1	5.71556e+06	6.11012e+06	5.5457e+06	5.11528e+06	5.77103e+06	5.97998e+06	5.60657e+06	5.80248e+06
A0A2H4H7K4	Nicotinamide phosphoribosyltransferase	NAMPT	Nicotinamide phosphoribosyltransferase OS=Capra hircus OX=9925 GN=NAMPT PE=2 SV=1	11.234	8	3	3	3	491	55.3	7.18	10.61	3	0	1	2.23781e+07	2.2979e+07	2.40834e+07	1.81853e+07	2.24033e+07	2.64032e+07	2.59699e+07	2.47203e+07
A0A452DX21	TIP41-like protein	LOC108638613	TIP41-like protein OS=Capra hircus OX=9925 GN=LOC108638613 PE=3 SV=1	11.213	11	3	7	3	272	31.4	5.94	21.01	3	0	1	1.13943e+07	1.15258e+07	1.14384e+07	1.00334e+07	1.13826e+07	1.20058e+07	1.15155e+07	1.14567e+07
A0A452FB22	Iron-sulfur cluster assembly enzyme	ISCU	Iron-sulfur cluster assembly enzyme OS=Capra hircus OX=9925 GN=ISCU PE=3 SV=1	11.206	30	5	9	5	167	17.9	9.42	29.98	5	0	1	2.17453e+07	2.24595e+07	2.3551e+07	2.22619e+07	2.33013e+07	2.22731e+07	2.21984e+07	2.33468e+07
A0A452ERK3			Uncharacterized protein OS=Capra hircus OX=9925 PE=4 SV=1	11.194	27	2	14	2	84	9.2	5	48.6	2	0	1	1.15755e+08	1.11213e+08	1.31202e+08	1.17716e+08	9.08978e+07	1.09998e+08	1.22635e+08	1.34887e+08
A0A452EIW8	Thimet oligopeptidase 1	THOP1	Thimet oligopeptidase 1 OS=Capra hircus OX=9925 GN=THOP1 PE=3 SV=1	11.18	6	3	3	3	656	74.4	6.25	8.5	3	0	1	5.19387e+06	7.70846e+06	5.53529e+06	5.55784e+06	5.73171e+06	5.63383e+06	5.76035e+06	5.88517e+06
A0A452EHI7			Uncharacterized protein OS=Capra hircus OX=9925 PE=4 SV=1	11.178	16	4	7	4	193	21.8	5.77	18.51	4	0	1	3.33878e+07	3.15252e+07	3.11335e+07	2.89447e+07	3.08165e+07	3.05739e+07	3.34824e+07	3.03627e+07
A0A452FF73	Ubiquitinyl hydrolase 1	OTUB2	Ubiquitinyl hydrolase 1 OS=Capra hircus OX=9925 GN=OTUB2 PE=3 SV=1	11.155	19	4	7	4	234	27.2	6.11	16.62	4	0	1	3.74875e+07	3.9273e+07	3.97503e+07	3.60298e+07	3.93719e+07	3.8755e+07	4.06885e+07	3.93712e+07
A0A452F0R5	Fructose-bisphosphatase	FBP2	Fructose-bisphosphatase OS=Capra hircus OX=9925 GN=FBP2 PE=3 SV=1	11.149	7	3	12	1	350	38	7.97	20.6	3	0	1	852847	750193	856956	4.00729e+06	748994	1.19742e+06	845824	793369
A0A452DTJ6	Proteasome assembly chaperone 2	PSMG2	Proteasome assembly chaperone 2 OS=Capra hircus OX=9925 GN=PSMG2 PE=3 SV=1	11.114	9	2	6	2	264	29.2	5.9	13.77	2	0	1	8.79683e+06	9.06059e+06	8.77703e+06	7.81909e+06	8.75017e+06	9.07171e+06	8.54389e+06	8.31627e+06
A0A452G7B5	Glycine N-methyltransferase	GNMT	Glycine N-methyltransferase OS=Capra hircus OX=9925 GN=GNMT PE=3 SV=1	11.102	16	4	11	3	294	32.8	8.75	25.31	4	0	1	8.36543e+06	8.6115e+06	8.057e+06	1.425e+07	8.36175e+06	9.69798e+06	8.5993e+06	8.42149e+06
A0A452F0Y7	Ubiquitin carboxyl-terminal hydrolase	USP4	Ubiquitin carboxyl-terminal hydrolase OS=Capra hircus OX=9925 GN=USP4 PE=3 SV=1	11.058	4	4	6	4	963	108.5	5.91	10.63	4	0	1	9.14256e+06	1.19876e+07	9.54409e+06	8.91551e+06	9.88351e+06	9.81593e+06	9.22649e+06	9.21082e+06
A0A452FAW1	Myosin heavy chain 9	MYH9	Myosin heavy chain 9 OS=Capra hircus OX=9925 GN=MYH9 PE=3 SV=1	11.038	2	5	6	4	1965	227.1	5.6	13.71	5	1	1	2.24921e+07	2.41648e+07	2.25109e+07	2.84291e+07	2.36041e+07	2.53864e+07	2.25816e+07	2.21837e+07
A0A452DXL2	NPL4 homolog, ubiquitin recognition factor	NPLOC4	NPL4 homolog, ubiquitin recognition factor OS=Capra hircus OX=9925 GN=NPLOC4 PE=3 SV=1	11.024	5	3	3	3	608	68	6.33	10.22	3	0	1	2.63412e+06	2.46687e+06	2.65351e+06	2.52485e+06	2.71163e+06	2.69203e+06	2.72239e+06	2.64146e+06
A0A452FBS1	FAD-binding PCMH-type domain-containing protein		FAD-binding PCMH-type domain-containing protein OS=Capra hircus OX=9925 PE=4 SV=1	11.022	14	3	5	2	295	31.1	7.15	15.97	3	0	1	7.27743e+06	8.45205e+06	8.09046e+06	1.05862e+07	9.45583e+06	7.8881e+06	7.92605e+06	9.54747e+06
A0A452ENR8	Complex I subunit B13	NDUFA5	Complex I subunit B13 OS=Capra hircus OX=9925 GN=NDUFA5 PE=3 SV=1	11.017	19	3	4	3	104	12	5.95	14.79	3	0	1	6.72304e+06	6.73368e+06	7.37536e+06	8.56371e+06	8.54067e+06	6.4395e+06	6.58014e+06	7.33965e+06
A0A452E2P5	Solute carrier organic anion transporter family member	SLCO6A1	Solute carrier organic anion transporter family member OS=Capra hircus OX=9925 GN=SLCO6A1 PE=3 SV=1	10.986	4	3	6	3	726	79.5	8.72	22.21	3	0	1	1.11691e+07	1.08101e+07	1.13613e+07	9.73627e+06	1.20291e+07	1.14412e+07	1.09215e+07	1.15349e+07
A0A452DXP3	Cathepsin V	CTSV	Cathepsin V OS=Capra hircus OX=9925 GN=CTSV PE=3 SV=1	10.968	10	3	6	3	334	37.2	7.64	19.2	3	0	1	6.0223e+06	6.19526e+06	5.92714e+06	5.19158e+06	5.77595e+06	6.15442e+06	5.82303e+06	5.75926e+06
A0A452DS27	Protein rogdi homolog	ROGDI	Protein rogdi homolog OS=Capra hircus OX=9925 GN=ROGDI PE=3 SV=1	10.956	10	2	4	2	287	32.3	7.88	15.47	2	0	1	8.66343e+06	8.95263e+06	9.04621e+06	8.02739e+06	9.48077e+06	8.86615e+06	9.60042e+06	9.99668e+06
A0A452E4N1	RNA helicase	LOC108634620	RNA helicase OS=Capra hircus OX=9925 GN=LOC108634620 PE=3 SV=1	10.943	6	4	5	2	660	73.1	7.23	15.15	4	2	1	1.29472e+07	1.31785e+07	1.17161e+07	1.14287e+07	1.29398e+07	1.3429e+07	1.24731e+07	1.26951e+07
A0A452F9T4	Phosphatidylinositol 4-kinase type 2	PI4K2A	Phosphatidylinositol 4-kinase type 2 OS=Capra hircus OX=9925 GN=PI4K2A PE=3 SV=1	10.871	8	4	4	4	479	54.1	8.28	9.66	4	0	1	7.55061e+06	7.88394e+06	6.93872e+06	6.71014e+06	7.24986e+06	7.43558e+06	6.55344e+06	6.47134e+06
A0A452FA00	Armadillo repeat containing 10	ARMC10	Armadillo repeat containing 10 OS=Capra hircus OX=9925 GN=ARMC10 PE=4 SV=1	10.868	10	3	4	3	306	33.4	8.43	9.38	3	0	1	2.25429e+07	2.26105e+07	2.22474e+07	2.02601e+07	2.33763e+07	2.17879e+07	2.34008e+07	2.47951e+07
A0A452E4U0	Hexokinase	HKDC1	Hexokinase OS=Capra hircus OX=9925 GN=HKDC1 PE=3 SV=1	10.857	4	3	5	1	918	102.6	6.57	15.59	3	0	1	1.31834e+07	1.0911e+07	1.14698e+07	2.04577e+07	1.55272e+07	1.63734e+07	1.03899e+07	1.12935e+07
A0A452G975	Coiled-coil domain-containing protein 170	LOC102175585	Coiled-coil domain-containing protein 170 OS=Capra hircus OX=9925 GN=LOC102175585 PE=4 SV=1	10.841	13	5	6	5	371	43	5.67	11.06	5	0	1	9.38707e+06	9.91904e+06	9.74296e+06	8.81073e+06	9.83849e+06	1.01546e+07	9.94451e+06	9.43473e+06
A0A452G3S3	Galactose-1-phosphate uridylyltransferase	GALT	Galactose-1-phosphate uridylyltransferase OS=Capra hircus OX=9925 GN=GALT PE=3 SV=1	10.836	10	4	7	4	360	41.2	6.67	20.91	4	0	1	1.09922e+07	1.1378e+07	1.22761e+07	1.10577e+07	1.15254e+07	1.17982e+07	1.21332e+07	1.21146e+07
A0A452DVE4	Solute carrier family 25 member 51	SLC25A51	Solute carrier family 25 member 51 OS=Capra hircus OX=9925 GN=SLC25A51 PE=3 SV=1	10.821	12	3	3	3	297	33.9	9.7	10.61	3	0	1	8.04615e+06	8.81493e+06	8.24469e+06	8.46823e+06	8.60031e+06	8.14147e+06	8.19659e+06	8.56651e+06
A0A452ESP4	Iron-sulfur cluster assembly 1	ISCA1	Iron-sulfur cluster assembly 1 OS=Capra hircus OX=9925 GN=ISCA1 PE=4 SV=1	10.8	19	2	4	2	129	14.2	9.1	11.56	2	0	1	1.46468e+07	1.48061e+07	1.54387e+07	1.38923e+07	1.47189e+07	1.43266e+07	1.59494e+07	1.56722e+07
A0A452G9Z7	WD repeat domain 61	WDR61	WD repeat domain 61 OS=Capra hircus OX=9925 GN=WDR61 PE=4 SV=1	10.791	9	2	3	2	305	33.5	5.47	8.75	2	0	1	1.50953e+07	7.25047e+06	1.52612e+07	1.24862e+07	1.42072e+07	1.51896e+07	1.51316e+07	1.49658e+07
A0A452E000	Ecotropic viral integration site 5 like	EVI5L	Ecotropic viral integration site 5 like OS=Capra hircus OX=9925 GN=EVI5L PE=4 SV=1	10.775	5	3	3	3	830	95.1	5.31	10.39	3	0	1	3.00706e+06	3.26379e+06	3.0926e+06	2.86481e+06	3.00642e+06	3.43724e+06	3.13516e+06	3.14779e+06
A0A452DR24	HRas proto-oncogene, GTPase	HRAS	HRas proto-oncogene, GTPase OS=Capra hircus OX=9925 GN=HRAS PE=4 SV=1	10.761	15	2	2	2	170	18.8	5.11	8.79	2	0	1	3.28688e+06	3.4105e+06	3.44158e+06	3.21904e+06	3.45383e+06	3.37274e+06	3.48315e+06	3.54244e+06
A0A452FD51	26S proteasome non-ATPase regulatory subunit 9	PSMD9	26S proteasome non-ATPase regulatory subunit 9 OS=Capra hircus OX=9925 GN=PSMD9 PE=3 SV=1	10.709	11	2	6	2	221	24.2	6.43	10.65	2	0	1	8.43268e+06	8.04303e+06	8.09845e+06	7.74874e+06	8.2397e+06	8.20833e+06	7.54387e+06	7.67677e+06
A0A452FRZ3	Cytochrome c oxidase subunit	COX6B1	Cytochrome c oxidase subunit OS=Capra hircus OX=9925 GN=COX6B1 PE=3 SV=1	10.708	43	4	21	3	86	10.2	8.75	48.07	4	0	1	1.03005e+07	9.99919e+06	8.79932e+06	1.02672e+07	1.02e+07	1.02109e+07	8.17078e+06	8.01043e+06
A0A452F2C6	Ezrin	EZR	Ezrin OS=Capra hircus OX=9925 GN=EZR PE=4 SV=1	10.701	6	4	4	2	581	68.7	6.42	12.08	4	0	1	7.08331e+06	7.19017e+06	7.91587e+06	6.7865e+06	7.44965e+06	7.31996e+06	7.99074e+06	7.76264e+06
A0A452FWU9	Ribosomal protein S16	RPS16	Ribosomal protein S16 OS=Capra hircus OX=9925 GN=RPS16 PE=3 SV=1	10.701	21	3	4	3	146	16.4	10.21	11.58	3	0	1	2.74232e+06	2.93886e+06	2.77241e+06	4.89955e+06	3.04884e+06	2.96791e+06	2.88878e+06	2.8567e+06
A0A452G8Y8	Glutamate rich 6	ERICH6	Glutamate rich 6 OS=Capra hircus OX=9925 GN=ERICH6 PE=4 SV=1	10.691	5	3	4	3	667	76.1	5.07	9.01	3	0	1	8.54624e+06	8.44394e+06	8.81165e+06	1.17753e+07	9.03635e+06	9.55415e+06	8.8502e+06	9.07847e+06
G1DFY9	G protein beta subunit-like	MLST8	G protein beta subunit-like OS=Capra hircus OX=9925 GN=MLST8 PE=2 SV=1	10.674	10	3	5	3	326	35.8	6.3	16.74	3	0	1	7.88241e+06	7.49518e+06	8.19293e+06	6.88644e+06	8.53716e+06	8.6928e+06	8.76664e+06	8.2343e+06
A0A452DLU5	Signal peptidase complex catalytic subunit SEC11	SEC11A	Signal peptidase complex catalytic subunit SEC11 OS=Capra hircus OX=9925 GN=SEC11A PE=3 SV=1	10.658	18	4	6	4	183	20.6	7.96	14.23	4	0	1	2.10732e+07	2.31666e+07	2.25396e+07	2.76651e+07	2.52117e+07	2.2644e+07	2.35614e+07	2.49367e+07
A0A452F333	Cadherin-1	CDH1	Cadherin-1 OS=Capra hircus OX=9925 GN=CDH1 PE=4 SV=1	10.647	3	3	7	3	887	98.2	4.93	15.37	3	0	1	1.23092e+08	1.20936e+08	1.27996e+08	1.16274e+08	1.20665e+08	1.15116e+08	1.26613e+08	1.25748e+08
A0A452EE16	Mitochondrial calcium uniporter regulator 1	MCUR1	Mitochondrial calcium uniporter regulator 1 OS=Capra hircus OX=9925 GN=MCUR1 PE=3 SV=1	10.598	10	4	5	4	367	40.1	10.02	13.44	4	0	1	2.33204e+07	2.61469e+07	2.50426e+07	3.02545e+07	2.16456e+07	2.43669e+07	2.44465e+07	2.76976e+07
A0A452G092	Secretory carrier-associated membrane protein	SCAMP1	Secretory carrier-associated membrane protein OS=Capra hircus OX=9925 GN=SCAMP1 PE=3 SV=1	10.591	8	3	7	3	387	43.1	8.98	21.29	3	0	1	1.02548e+07	1.08391e+07	1.04078e+07	1.10171e+07	1.1102e+07	1.06804e+07	1.05254e+07	1.08785e+07
A0A452EMT1	Ras-related protein Rab-3	RAB3D	Ras-related protein Rab-3 OS=Capra hircus OX=9925 GN=RAB3D PE=3 SV=1	10.579	6	2	8	1	219	24.4	4.93	22.52	2	0	1	5.87881e+06	6.03533e+06	6.18987e+06	5.68838e+06	6.06464e+06	5.57305e+06	6.09181e+06	5.63517e+06
A0A452DT07	Heterogeneous nuclear ribonucleoprotein F	HNRNPF	Heterogeneous nuclear ribonucleoprotein F OS=Capra hircus OX=9925 GN=HNRNPF PE=4 SV=1	10.573	8	2	3	2	414	45.7	5.49	12.05	2	0	1	3.42005e+06	3.57407e+06	3.28805e+06	3.0423e+06	3.75096e+06	3.52517e+06	3.29473e+06	3.15048e+06
A0A452DKZ3	NSF attachment protein gamma	NAPG	NSF attachment protein gamma OS=Capra hircus OX=9925 GN=NAPG PE=3 SV=1	10.507	15	4	8	4	312	34.7	5.41	20.86	4	0	1	8.20041e+06	1.06317e+07	8.29446e+06	8.80662e+06	9.63657e+06	9.94404e+06	1.4401e+07	2.70782e+07
A0A452EGN1	Ras homolog family member G	RHOG	Ras homolog family member G OS=Capra hircus OX=9925 GN=RHOG PE=4 SV=1	10.494	20	3	3	3	191	21.3	8.12	9.29	3	0	1	4.60998e+06	4.53937e+06	3.98582e+06	6.2158e+06	3.95369e+06	4.16246e+06	3.53274e+06	4.93208e+06
A0A452F7T5	Chromosome 15 open reading frame 65	C15orf65	Chromosome 15 open reading frame 65 OS=Capra hircus OX=9925 GN=C15orf65 PE=4 SV=1	10.49	22	2	8	2	122	13.9	7.81	27.16	2	0	1	2.32858e+07	2.42467e+07	2.45078e+07	2.14874e+07	2.33534e+07	2.40185e+07	2.49863e+07	2.44173e+07
A0A452E1E4	Glycine cleavage system H protein	LOC108634030	Glycine cleavage system H protein OS=Capra hircus OX=9925 GN=LOC108634030 PE=3 SV=1	10.489	18	2	4	2	173	18.7	5.22	13.88	2	0	1	7.796e+06	1.09606e+07	7.4875e+06	8.28168e+06	7.95347e+06	7.45958e+06	7.67197e+06	7.35832e+06
A0A452GB54	NFKB inhibitor interacting Ras like 2	NKIRAS2	NFKB inhibitor interacting Ras like 2 OS=Capra hircus OX=9925 GN=NKIRAS2 PE=3 SV=1	10.411	17	4	5	4	191	21.5	8.05	15.38	4	0	1	2.21584e+07	2.37402e+07	2.30503e+07	1.97885e+07	2.26754e+07	2.24496e+07	2.40393e+07	2.42345e+07
A0A452F689	Family with sequence similarity 71 member F2	FAM71F2	Family with sequence similarity 71 member F2 OS=Capra hircus OX=9925 GN=FAM71F2 PE=4 SV=1	10.384	7	2	5	2	300	33.4	5.64	11.82	2	0	1	4.67104e+07	4.0556e+07	4.39131e+07	3.93846e+07	4.83196e+07	4.76716e+07	5.34488e+07	4.53149e+07
A0A452FHC8	Galectin-3-binding protein	LGALS3BP	Galectin-3-binding protein OS=Capra hircus OX=9925 GN=LGALS3BP PE=4 SV=1	10.344	5	3	6	3	553	61.8	5.31	18.15	3	0	1	1.93673e+07	1.9627e+07	1.97462e+07	1.78827e+07	2.03334e+07	2.06342e+07	2.04275e+07	1.88574e+07
A0A452G2E9	Cytochrome c oxidase assembly factor 1 homolog	COA1	Cytochrome c oxidase assembly factor 1 homolog OS=Capra hircus OX=9925 GN=COA1 PE=4 SV=1	10.331	14	2	6	2	135	15.3	8.91	16.75	2	0	1	1.63938e+07	1.83446e+07	1.66059e+07	1.7043e+07	1.51131e+07	1.54137e+07	1.5533e+07	1.65847e+07
A0A452G5C8	Complex I-9kD	NDUFV3	Complex I-9kD OS=Capra hircus OX=9925 GN=NDUFV3 PE=3 SV=1	10.298	16	1	3	1	109	11.9	9.85	16.65	1	0	1	5.92575e+06	5.93907e+06	6.56872e+06	6.21497e+06	6.49722e+06	4.83371e+06	5.89113e+06	6.47732e+06
A0A452EXV3	Nucleoporin NDC1	NDC1	Nucleoporin NDC1 OS=Capra hircus OX=9925 GN=NDC1 PE=3 SV=1	10.232	5	3	4	3	674	76.5	8.97	9.47	3	0	1	9.57582e+06	9.40563e+06	9.70137e+06	8.24506e+06	9.47978e+06	9.72266e+06	1.03752e+07	9.82922e+06
A0A452EL33	BCL2 like 13	BCL2L13	BCL2 like 13 OS=Capra hircus OX=9925 GN=BCL2L13 PE=3 SV=1	10.195	11	4	4	4	425	45.2	4.53	10.55	4	0	1	9.32426e+06	9.33328e+06	9.59317e+06	8.39021e+06	9.07026e+06	9.07509e+06	9.4989e+06	9.75943e+06
A0A452G0S2	Family with sequence similarity 162 member A	FAM162A	Family with sequence similarity 162 member A OS=Capra hircus OX=9925 GN=FAM162A PE=3 SV=1	10.175	19	3	4	3	151	17.3	9.74	12.27	3	0	1	5.98892e+06	6.08465e+06	6.41802e+06	5.70508e+06	6.47085e+06	7.12397e+06	5.78966e+06	5.95052e+06
A0A452ENB2	Phospholipase A2 activating protein	PLAA	Phospholipase A2 activating protein OS=Capra hircus OX=9925 GN=PLAA PE=3 SV=1	10.174	6	4	4	4	796	87.1	6.33	9.43	4	0	1	7.82863e+06	8.38962e+06	8.46741e+06	7.47376e+06	8.54229e+06	8.78913e+06	8.14377e+06	8.71269e+06
A0A452E1E7	Trafficking from ER to golgi regulator	TFG	Trafficking from ER to golgi regulator OS=Capra hircus OX=9925 GN=TFG PE=4 SV=1	10.168	5	2	2	2	401	43.3	5.1	7.76	2	0	1	3.68364e+06	3.64204e+06	3.95102e+06	3.65527e+06	3.89302e+06	3.75453e+06	4.40187e+06	4.0246e+06
A0A452DYY2	Glutaredoxin 5	GLRX5	Glutaredoxin 5 OS=Capra hircus OX=9925 GN=GLRX5 PE=4 SV=1	10.137	14	2	6	2	159	16.8	7.99	15.23	2	0	1	1.96655e+07	1.83938e+07	1.98559e+07	2.12288e+07	2.09436e+07	1.76624e+07	1.8687e+07	1.78701e+07
A0A452EU59	Clathrin light chain	CLTA	Clathrin light chain OS=Capra hircus OX=9925 GN=CLTA PE=3 SV=1	10.117	16	5	7	5	240	26.3	4.68	16.66	5	0	1	2.45224e+07	2.1955e+07	2.33965e+07	2.1895e+07	2.3067e+07	2.16413e+07	2.34308e+07	2.22064e+07
A0A452DSV3	Myosin light chain 6	MYL6B	Myosin light chain 6 OS=Capra hircus OX=9925 GN=MYL6B PE=4 SV=1	10.112	21	3	4	3	160	18	4.53	9.78	3	0	1	6.93808e+06	5.84869e+06	5.13921e+06	7.39323e+06	5.69777e+06	5.84428e+06	5.06359e+06	5.11167e+06
A0A452E2F2	Cyclic nucleotide binding domain containing 1	CNBD1	Cyclic nucleotide binding domain containing 1 OS=Capra hircus OX=9925 GN=CNBD1 PE=4 SV=1	10.09	7	3	3	3	502	57.4	9.25	8.85	3	0	1	1.44904e+07	1.63575e+07	1.43854e+07	1.22532e+07	1.46321e+07	1.4788e+07	1.51144e+07	1.55655e+07
A0A452EQN7	Calcium regulated heat stable protein 1	CARHSP1	Calcium regulated heat stable protein 1 OS=Capra hircus OX=9925 GN=CARHSP1 PE=4 SV=1	10.083	24	3	4	3	147	15.9	7.87	12.25	3	0	1	7.53957e+06	7.34154e+06	7.47577e+06	6.47674e+06	7.36079e+06	8.07641e+06	8.06511e+06	7.62778e+06
A0A452F2L8	Creatine kinase	CKB	Creatine kinase OS=Capra hircus OX=9925 GN=CKB PE=3 SV=1	10.075	10	3	5	2	381	42.7	5.78	13.01	3	0	1	5.27641e+06	5.39856e+06	5.18554e+06	4.75009e+06	5.20748e+06	5.40527e+06	5.05271e+06	5.05078e+06
A0A452FIZ8	Exocyst complex component 5	EXOC5	Exocyst complex component 5 OS=Capra hircus OX=9925 GN=EXOC5 PE=3 SV=1	10.073	5	4	4	4	694	80.3	6.96	10.13	4	0	1	1.6831e+07	1.5492e+07	1.65253e+07	1.43163e+07	1.72452e+07	1.83712e+07	1.78164e+07	1.68205e+07
A0A452G7I5	TNF receptor-associated factor	TRAF3	TNF receptor-associated factor OS=Capra hircus OX=9925 GN=TRAF3 PE=3 SV=1	10.056	6	4	5	4	568	64.2	7.97	13.22	4	0	1	7.05335e+06	6.71308e+06	6.77912e+06	5.73983e+06	6.66407e+06	7.45293e+06	6.66252e+06	6.26303e+06
A0A452GAW3	Chromosome 3 C1orf141 homolog	C3H1orf141	Chromosome 3 C1orf141 homolog OS=Capra hircus OX=9925 GN=C3H1orf141 PE=4 SV=1	10.048	4	2	3	2	442	50.9	9.57	8.46	2	0	1	1.04812e+06	1.17889e+06	1.06023e+06	1.18262e+06	1.1992e+06	1.15303e+06	991099	1.02033e+06
A0A452EVG2	Annexin	ANXA6	Annexin OS=Capra hircus OX=9925 GN=ANXA6 PE=3 SV=1	10.027	6	3	6	2	673	75.8	5.74	17.78	3	0	1	7.8238e+06	7.25197e+06	7.71804e+06	7.1889e+06	8.48783e+06	7.90983e+06	7.73544e+06	7.60424e+06
A0A452FP41	Acyl-CoA synthetase long chain family member 1	ACSL1	Acyl-CoA synthetase long chain family member 1 OS=Capra hircus OX=9925 GN=ACSL1 PE=4 SV=1	9.999	3	2	4	1	719	80.4	7.77	13.31	2	0	1	2.21013e+06	2.9595e+06	2.11137e+06	2.28483e+06	2.27227e+06	2.34195e+06	1.94151e+06	2.01579e+06
A0A452DNJ8	Tyrosine--tRNA ligase	YARS2	Tyrosine--tRNA ligase OS=Capra hircus OX=9925 GN=YARS2 PE=3 SV=1	9.958	9	3	6	3	478	52.9	8.88	12.87	3	0	1	2.21972e+07	2.26442e+07	2.20903e+07	1.94237e+07	2.11056e+07	2.53298e+07	2.33743e+07	2.26618e+07
A0A452G2C2	Thymus, brain and testes associated	TBATA	Thymus, brain and testes associated OS=Capra hircus OX=9925 GN=TBATA PE=4 SV=1	9.953	9	3	7	3	331	37.1	9.54	18.39	3	0	1	6.65079e+07	6.52344e+07	7.17402e+07	6.33418e+07	7.20487e+07	7.20927e+07	7.02184e+07	7.06735e+07
A0A452E4Z0	Chromosome 4 open reading frame 51	C4orf51	Chromosome 4 open reading frame 51 OS=Capra hircus OX=9925 GN=C4orf51 PE=4 SV=1	9.946	10	2	6	2	195	22.1	9.99	18.16	2	0	1	4.49482e+07	4.52387e+07	4.77363e+07	4.23008e+07	4.49085e+07	4.10339e+07	4.63002e+07	4.56551e+07
G1DG20	Clusterin-associated protein 1	CLUAP1	Clusterin-associated protein 1 OS=Capra hircus OX=9925 GN=CLUAP1 PE=2 SV=1	9.929	6	2	4	2	438	50.3	4.84	11.29	2	0	1	5.24885e+06	5.57778e+06	4.99001e+06	5.03984e+06	5.48501e+06	5.18902e+06	5.09556e+06	4.87195e+06
A0A452FGW0	Transmembrane protein 11	TMEM11	Transmembrane protein 11 OS=Capra hircus OX=9925 GN=TMEM11 PE=3 SV=1	9.925	21	4	15	4	187	20.9	6.61	41.73	4	0	1	5.77758e+07	5.69883e+07	5.95094e+07	5.66663e+07	5.58928e+07	5.67862e+07	5.89714e+07	5.91827e+07
A0A452EI29	NADH dehydrogenase [ubiquinone] 1 alpha subcomplex subunit 6	NDUFA6	NADH dehydrogenase [ubiquinone] 1 alpha subcomplex subunit 6 OS=Capra hircus OX=9925 GN=NDUFA6 PE=3 SV=1	9.916	13	1	1	1	128	15	9.98	6.65	1	0	1	876038	931444	909040	1.02229e+06	1.0937e+06	824274	1.00664e+06	1.06951e+06
A0A452F3J1	T-complex 11	TCP11	T-complex 11 OS=Capra hircus OX=9925 GN=TCP11 PE=3 SV=1	9.912	9	3	7	1	295	32.8	5.95	25.69	3	0	1	2.52077e+06	2.31178e+06	2.55309e+06	2.39876e+06	2.76019e+06	2.84402e+06	2.59898e+06	2.55796e+06
A0A452F8P3	Non-specific serine/threonine protein kinase	STK39	Non-specific serine/threonine protein kinase OS=Capra hircus OX=9925 GN=STK39 PE=4 SV=1	9.893	3	2	5	2	631	70.1	6.6	13.43	2	0	1	7.37106e+06	7.50763e+06	7.18149e+06	6.44338e+06	7.1268e+06	7.64792e+06	7.12042e+06	7.12804e+06
A0A452F3P8	Cancer/testis antigen 83	CT83	Cancer/testis antigen 83 OS=Capra hircus OX=9925 GN=CT83 PE=4 SV=1	9.869	16	2	5	2	123	14	9.99	19.55	2	0	1	1.64992e+07	1.65159e+07	1.58333e+07	1.40094e+07	1.65447e+07	1.60095e+07	1.82911e+07	1.57003e+07
A0A452FCK0	Serine protease 58-like	LOC102178440	Serine protease 58-like OS=Capra hircus OX=9925 GN=LOC102178440 PE=4 SV=1	9.863	18	4	6	4	243	27.6	5.21	13.8	4	0	1	7.45178e+06	8.53231e+06	7.15145e+06	7.23738e+06	7.64405e+06	7.8028e+06	7.35397e+06	7.20093e+06
A0A452DWE8	Solute carrier family 25 member 46	SLC25A46	Solute carrier family 25 member 46 OS=Capra hircus OX=9925 GN=SLC25A46 PE=3 SV=1	9.845	5	2	8	2	405	44.3	7.58	20.75	2	0	1	9.79363e+06	1.01289e+07	9.41497e+06	7.34731e+06	9.39389e+06	8.74586e+06	9.37139e+06	9.48787e+06
A0A452DXV2	Outer dense fiber of sperm tails 3 like 2	ODF3L2	Outer dense fiber of sperm tails 3 like 2 OS=Capra hircus OX=9925 GN=ODF3L2 PE=4 SV=1	9.831	9	1	2	1	264	28.4	10.45	2.93	1	0	1	2.80252e+06	2.43475e+06	3.13522e+06	2.82902e+06	2.77765e+06	2.68763e+06	2.31755e+06	2.40241e+06
A0A452E6J2	Aspartate--tRNA ligase, cytoplasmic	DARS1	Aspartate--tRNA ligase, cytoplasmic OS=Capra hircus OX=9925 GN=DARS1 PE=3 SV=1	9.804	8	4	5	4	501	57.1	6.84	8.92	4	0	1	1.6104e+07	1.64272e+07	1.62105e+07	1.63515e+07	1.67434e+07	1.83012e+07	1.60422e+07	1.67143e+07
A0A452G3C9	Calumenin	CALU	Calumenin OS=Capra hircus OX=9925 GN=CALU PE=3 SV=1	9.804	11	3	5	1	315	37	4.59	18.11	3	0	1	5.02469e+06	6.06371e+06	4.47336e+06	4.65326e+06	5.19741e+06	4.46705e+06	4.09554e+06	3.93897e+06
A0A452DNI3	C-1-tetrahydrofolate synthase, cytoplasmic	MTHFD1	C-1-tetrahydrofolate synthase, cytoplasmic OS=Capra hircus OX=9925 GN=MTHFD1 PE=3 SV=1	9.745	4	4	8	4	935	101.2	6.95	20.69	4	0	1	1.63689e+07	1.50416e+07	1.53668e+07	2.31048e+07	1.54126e+07	1.77023e+07	1.53491e+07	1.5463e+07
A0A452E3A9	Family with sequence similarity 183 member A	FAM183A	Family with sequence similarity 183 member A OS=Capra hircus OX=9925 GN=FAM183A PE=4 SV=1	9.738	16	2	5	2	135	16.2	9.09	19.93	2	0	1	6.56702e+06	6.75114e+06	7.08035e+06	9.18131e+06	8.23652e+06	7.14422e+06	6.43152e+06	7.13539e+06
A0A452FV74	Keratin 36	KRT36	Keratin 36 OS=Capra hircus OX=9925 GN=KRT36 PE=3 SV=1	9.69	9	4	8	2	361	41.5	4.73	21.38	4	0	1	4.14462e+06	4.87619e+06	4.42201e+06	3.90816e+06	4.21551e+06	4.42739e+06	4.65153e+06	4.23874e+06
A0A452G0J7	Complex I-SGDH	NDUFB5	Complex I-SGDH OS=Capra hircus OX=9925 GN=NDUFB5 PE=3 SV=1	9.678	10	2	5	2	189	21.6	9.69	15.43	2	0	1	2.07678e+07	2.16367e+07	2.24294e+07	3.58207e+07	2.35512e+07	3.45974e+07	2.1715e+07	2.39124e+07
A0A452F5X7	Biphenyl hydrolase like	BPHL	Biphenyl hydrolase like OS=Capra hircus OX=9925 GN=BPHL PE=4 SV=1	9.653	11	4	10	4	291	32.6	8.27	26.69	4	0	1	4.6451e+07	4.92248e+07	4.71475e+07	4.38016e+07	4.85589e+07	4.75047e+07	4.76178e+07	4.92865e+07
A0A452FB30	Signal recognition particle receptor subunit beta	SRPRB	Signal recognition particle receptor subunit beta OS=Capra hircus OX=9925 GN=SRPRB PE=3 SV=1	9.608	12	2	2	2	271	29.6	9.41	6.89	2	0	1	2.91511e+06	3.24004e+06	2.97749e+06	3.53985e+06	3.14271e+06	3.05535e+06	3.20028e+06	3.05617e+06
A0A452DLW7	Calcium-binding mitochondrial carrier protein SCaMC-1-like	LOC102187823	Calcium-binding mitochondrial carrier protein SCaMC-1-like OS=Capra hircus OX=9925 GN=LOC102187823 PE=3 SV=1	9.595	10	5	8	4	387	43.8	8.43	21.21	5	0	1	2.25303e+07	2.37017e+07	2.27417e+07	2.27942e+07	2.40275e+07	2.18824e+07	2.3877e+07	2.50342e+07
A0A452E0V0	Eukaryotic peptide chain release factor subunit 1	ETF1	Eukaryotic peptide chain release factor subunit 1 OS=Capra hircus OX=9925 GN=ETF1 PE=3 SV=1	9.585	8	3	4	3	437	49	5.71	10.64	3	0	1	8.12852e+06	9.09441e+06	9.04892e+06	8.85485e+06	9.70502e+06	9.00514e+06	9.30947e+06	9.87399e+06
A0A452FA69	Chromosome 23 C6orf136 homolog	C6orf136	Chromosome 23 C6orf136 homolog OS=Capra hircus OX=9925 GN=C6orf136 PE=4 SV=1	9.585	9	3	5	3	315	35.5	8.37	10.79	3	0	1	1.68904e+07	1.65922e+07	1.61619e+07	1.63428e+07	1.69502e+07	1.5075e+07	1.59711e+07	1.66967e+07
A0A452F164	UV excision repair protein RAD23	RAD23A	UV excision repair protein RAD23 OS=Capra hircus OX=9925 GN=RAD23A PE=3 SV=1	9.575	7	3	6	3	368	40.2	4.64	17.62	3	0	1	1.78821e+07	1.84079e+07	1.91173e+07	1.82704e+07	1.47414e+07	1.69792e+07	1.96509e+07	1.95969e+07
A0A452FD14	Glycerol-3-phosphate dehydrogenase [NAD(+)]	GPD1	Glycerol-3-phosphate dehydrogenase [NAD(+)] OS=Capra hircus OX=9925 GN=GPD1 PE=3 SV=1	9.565	9	4	11	1	358	38.7	6.79	24.07	4	0	1	1.26252e+06	973826	898653	2.1738e+06	997062	1.10238e+06	779037	915403
A0A452FLL4	Protein interacting with cyclin A1	PROCA1	Protein interacting with cyclin A1 OS=Capra hircus OX=9925 GN=PROCA1 PE=4 SV=1	9.528	7	4	18	4	378	42.2	6.54	48.86	4	0	1	1.5865e+08	1.40017e+08	1.43253e+08	1.46698e+08	1.47532e+08	1.72613e+08	1.30147e+08	1.30726e+08
A0A452FCR0	Leucine-rich repeat-containing protein 51	LRTOMT	Leucine-rich repeat-containing protein 51 OS=Capra hircus OX=9925 GN=LRTOMT PE=4 SV=1	9.515	14	3	5	3	192	22.1	9.39	14.75	3	0	1	1.45813e+07	1.56049e+07	1.62509e+07	1.53468e+07	1.63825e+07	1.5833e+07	1.61088e+07	1.7208e+07
A0A452FL24	Flagellum associated containing coiled-coil domains 1	FLACC1	Flagellum associated containing coiled-coil domains 1 OS=Capra hircus OX=9925 GN=FLACC1 PE=4 SV=1	9.515	13	3	5	3	251	28.7	9.17	17.33	3	0	1	1.8408e+07	1.93552e+07	1.84241e+07	2.02803e+07	1.82601e+07	1.87761e+07	1.80555e+07	1.77154e+07
A0A452EA69	DEAD box protein 5	DDX5	DEAD box protein 5 OS=Capra hircus OX=9925 GN=DDX5 PE=3 SV=1	9.502	5	3	4	2	622	70.1	8.88	9.82	3	0	1	3.2327e+06	3.30322e+06	3.05844e+06	3.77814e+06	3.5366e+06	3.96814e+06	3.11191e+06	3.26076e+06
A0A452E4B9	Potassium calcium-activated channel subfamily U member 1	KCNU1	Potassium calcium-activated channel subfamily U member 1 OS=Capra hircus OX=9925 GN=KCNU1 PE=4 SV=1	9.466	2	2	3	2	1143	129.6	8.47	11.97	2	0	1	2.88691e+06	3.25026e+06	3.00076e+06	2.71199e+06	3.04314e+06	2.90214e+06	3.05545e+06	3.04423e+06
A0A452FQ52	MTOR associated protein, eak-7 homolog	MEAK7	MTOR associated protein, eak-7 homolog OS=Capra hircus OX=9925 GN=MEAK7 PE=4 SV=1	9.443	6	3	3	3	456	50.4	7.24	8.26	3	0	1	1.39191e+07	1.32935e+07	1.47071e+07	1.21109e+07	1.51372e+07	1.55298e+07	1.41914e+07	1.36876e+07
A0A452FKR5	G protein-coupled receptor kinase	GRK4	G protein-coupled receptor kinase OS=Capra hircus OX=9925 GN=GRK4 PE=3 SV=1	9.432	7	3	4	3	583	66.9	7.56	14.71	3	0	1	1.91128e+07	1.98348e+07	1.94505e+07	1.67776e+07	2.03747e+07	2.10529e+07	1.98247e+07	2.02205e+07
A0A452FU76	WD repeat-containing protein 87	WDR87	WD repeat-containing protein 87 OS=Capra hircus OX=9925 GN=WDR87 PE=4 SV=1	9.42	2	5	5	5	2907	336.4	6.24	12.23	5	0	1	8.23735e+06	9.59859e+06	8.57584e+06	7.90755e+06	8.70521e+06	8.8475e+06	7.94869e+06	8.30339e+06
A0A452FL40	Serine/threonine-protein phosphatase 2A 56 kDa regulatory subunit	PPP2R5C	Serine/threonine-protein phosphatase 2A 56 kDa regulatory subunit OS=Capra hircus OX=9925 GN=PPP2R5C PE=3 SV=1	9.411	5	2	3	2	454	52.9	7.21	8.4	2	0	1	3.56204e+06	3.79952e+06	3.43723e+06	3.07964e+06	3.74388e+06	4.28244e+06	3.63843e+06	3.91427e+06
A0A452DYD4	Cell division control protein 42 homolog	LOC102176514	Cell division control protein 42 homolog OS=Capra hircus OX=9925 GN=LOC102176514 PE=3 SV=1	9.407	14	2	2	1	182	20.2	5.6	8.31	2	0	1	1.55078e+06	1.70454e+06	1.59928e+06	1.94425e+06	1.73652e+06	1.78246e+06	1.66024e+06	1.5757e+06
A0A452DQT9	DDB1 and CUL4 associated factor 7	DCAF7	DDB1 and CUL4 associated factor 7 OS=Capra hircus OX=9925 GN=DCAF7 PE=4 SV=1	9.381	12	4	5	4	342	38.9	5.52	9.83	4	0	1	2.10724e+07	2.22348e+07	2.10904e+07	1.97464e+07	2.17644e+07	2.16668e+07	2.08493e+07	2.10708e+07
A0A452FEK9			Uncharacterized protein OS=Capra hircus OX=9925 PE=4 SV=1	9.341	16	3	7	3	170	18.7	6.87	10.46	3	0	1	2.12762e+07	2.03171e+07	2.24372e+07	1.82028e+07	2.19907e+07	2.49574e+07	2.26589e+07	2.26654e+07
A0A452E3I1	Histone H3	LOC106503499	Histone H3 OS=Capra hircus OX=9925 GN=LOC106503499 PE=3 SV=1	9.311	24	4	14	4	136	15.4	11.12	34.04	4	0	1	4.51908e+07	4.68565e+07	4.23113e+07	1.35269e+08	5.63234e+07	5.24534e+07	3.89063e+07	4.40798e+07
[truncated: 978 more rows]

## Sheet: TABLE S4
Accession	Protein name	Gene.symbol	Peptide sequence	Precursor charge	Product charge	C1	C2	C3	C4	B1	B2	B3	B4	FC	P-value
[truncated: 15 more rows]

[truncated: 3 more sheets: TABLE S5, TABLE S6, TABLE S7]
