# Supplementary material for: The antioxidant effects of butylated hydroxytoluene on cryopreserved goat sperm from a proteomic perspective
Source: PeerJ. 2024 Jul 5;12:e17580. doi: 10.7717/peerj.17580 (PMC11229688; doi:10.7717/peerj.17580)
Supplement: Supplemental Information 4 [file peerj-12-17580-s004.xlsx]

## Sheet: Sheet1
Test index	The multiple comparisons results of each test index
TM (%)	Group	Mean value	Standard error
	0 mM	53.0525	3.83678
	0.5 mM	61.68	0.577451
	1.0 mM	54.135	2.32506
	2.0 mM	51.98	3.01707
	multiple comparisons as following
	(I) group	(J) group	Mean difference (I-J)	significance (P value)	95% confidence interval
					Lower limit	Upper limit
	0 mM	0.5 mM	-8.627500*	0.044	-17.0043	-0.25069
		1.0 mM	-1.0825	0.783	-9.45931	7.29431
		2.0 mM	1.0725	0.785	-7.30431	9.44931
	0.5 mM	0 mM	8.627500*	0.044	0.25069	17.0043
		1.0 mM	7.545	0.073	-0.83181	15.9218
		2.0 mM	9.700000*	0.027	1.32319	18.0768
	1.0 mM	0 mM	1.0825	0.783	-7.29431	9.45931
		0.5 mM	-7.545	0.073	-15.9218	0.83181
		2.0 mM	2.155	0.585	-6.22181	10.5318
	2.0 mM	0 mM	-1.0725	0.785	-9.44931	7.30431
		0.5 mM	-9.700000*	0.027	-18.0768	-1.32319
		1.0 mM	-2.155	0.585	-10.5318	6.22181
	Note: * indicates the significance level of the mean difference was 0.05.
PM (%)	Group	Mean value	Standard error
	0 mM	29.2175	2.05899
	0.5 mM	39.22	2.98072
	1.0 mM	33.9075	1.70832
	2.0 mM	33.0175	2.61277
	multiple comparisons as following
	(I) group	(J) group	Mean difference (I-J)	significance (P value)	95% confidence interval
					Lower limit	Upper limit
	0 mM	0.5 mM	-10.002500*	0.0119648	-17.3701	-2.63486
		1.0 mM	-4.69	0.190677	-12.0576	2.67764
		2.0 mM	-3.8	0.283092	-11.1676	3.56764
	0.5 mM	0 mM	10.002500*	0.0119648	2.63486	17.3701
		1.0 mM	5.3125	0.142152	-2.05514	12.6801
		2.0 mM	6.2025	0.0915195	-1.16514	13.5701
	1.0 mM	0 mM	4.69	0.190677	-2.67764	12.0576
		0.5 mM	-5.3125	0.142152	-12.6801	2.05514
		2.0 mM	0.89	0.796863	-6.47764	8.25764
	2.0 mM	0 mM	3.8	0.283092	-3.56764	11.1676
		0.5 mM	-6.2025	0.0915195	-13.5701	1.16514
		1.0 mM	-0.89	0.796863	-8.25764	6.47764
	Note: * indicates the significance level of the mean difference was 0.05.
VCL (μm/s)	Group	Mean value	Standard error
	0 mM	79.305	4.31494
	0.5 mM	82.5025	4.46916
	1.0 mM	83.04	2.09788
	2.0 mM	82.25	3.76368
	multiple comparisons as following
	(I) group	(J) group	Mean difference (I-J)	significance (P value)	95% confidence interval
					Lower limit	Upper limit
	0 mM	0.5 mM	-3.1975	0.561	-14.8453	8.45033
		1.0 mM	-3.735	0.498	-15.3828	7.91283
		2.0 mM	-2.945	0.592	-14.5928	8.70283
	0.5 mM	0 mM	3.1975	0.561	-8.45033	14.8453
		1.0 mM	-0.5375	0.922	-12.1853	11.1103
		2.0 mM	0.2525	0.963	-11.3953	11.9003
	1.0 mM	0 mM	3.735	0.498	-7.91283	15.3828
		0.5 mM	0.5375	0.922	-11.1103	12.1853
		2.0 mM	0.79	0.885	-10.8578	12.4378
	2.0 mM	0 mM	2.945	0.592	-8.70283	14.5928
		0.5 mM	-0.2525	0.963	-11.9003	11.3953
		1.0 mM	-0.79	0.885	-12.4378	10.8578
	Note: * indicates the significance level of the mean difference was 0.05.
VAP (μm/s)	Group	Mean value	Standard error
	0 mM	55.7475	0.837599
	0.5 mM	64.97	1.15235
	1.0 mM	63.3825	3.94531
	2.0 mM	61.0975	3.75615
	multiple comparisons as following
	(I) group	(J) group	Mean difference (I-J)	significance (P value)	95% confidence interval
					Lower limit	Upper limit
	0 mM	0.5 mM	-9.222500*	0.039	-17.8973	-0.5477
		1.0 mM	-7.635	0.079	-16.3098	1.0398
		2.0 mM	-5.35	0.204	-14.0248	3.3248
	0.5 mM	0 mM	9.222500*	0.039	0.5477	17.8973
		1.0 mM	1.5875	0.697	-7.0873	10.2623
		2.0 mM	3.8725	0.35	-4.8023	12.5473
	1.0 mM	0 mM	7.635	0.079	-1.0398	16.3098
		0.5 mM	-1.5875	0.697	-10.2623	7.0873
		2.0 mM	2.285	0.577	-6.3898	10.9598
	2.0 mM	0 mM	5.35	0.204	-3.3248	14.0248
		0.5 mM	-3.8725	0.35	-12.5473	4.8023
		1.0 mM	-2.285	0.577	-10.9598	6.3898
	Note: * indicates the significance level of the mean difference was 0.05.
VSL (μm/s)	Group	Mean value	Standard error
	0 mM	48.535	2.93644
	0.5 mM	53.79	0.677963
	1.0 mM	51.6475	3.28705
	2.0 mM	48.7025	2.79966
	multiple comparisons as following
	(I) group	(J) group	Mean difference (I-J)	significance (P value)	95% confidence interval
					Lower limit	Upper limit
	0 mM	0.5 mM	-5.255	0.184	-13.3673	2.85726
		1.0 mM	-3.1125	0.42	-11.2248	4.99976
		2.0 mM	-0.1675	0.965	-8.27976	7.94476
	0.5 mM	0 mM	5.255	0.184	-2.85726	13.3673
		1.0 mM	2.1425	0.576	-5.96976	10.2548
		2.0 mM	5.0875	0.197	-3.02476	13.1998
	1.0 mM	0 mM	3.1125	0.42	-4.99976	11.2248
		0.5 mM	-2.1425	0.576	-10.2548	5.96976
		2.0 mM	2.945	0.444	-5.16726	11.0573
	2.0 mM	0 mM	0.1675	0.965	-7.94476	8.27976
		0.5 mM	-5.0875	0.197	-13.1998	3.02476
		1.0 mM	-2.945	0.444	-11.0573	5.16726
	Note: * indicates the significance level of the mean difference was 0.05.
ALH (μm/s)	Group	Mean value	Standard error
	0 mM	2.765	0.146998
	0.5 mM	2.965	0.148352
	1.0 mM	2.7125	0.178623
	2.0 mM	2.72	0.144568
	multiple comparisons as following
	(I) group	(J) group	Mean difference (I-J)	significance (P value)	95% confidence interval
					Lower limit	Upper limit
	0 mM	0.5 mM	-0.2	0.38	-0.678404	0.278404
		1.0 mM	0.0525	0.815	-0.425904	0.530904
		2.0 mM	0.045	0.841	-0.433404	0.523404
	0.5 mM	0 mM	0.2	0.38	-0.278404	0.678404
		1.0 mM	0.2525	0.273	-0.225904	0.730904
		2.0 mM	0.245	0.286	-0.233404	0.723404
	1.0 mM	0 mM	-0.0525	0.815	-0.530904	0.425904
		0.5 mM	-0.2525	0.273	-0.730904	0.225904
		2.0 mM	-0.0075	0.973	-0.485904	0.470904
	2.0 mM	0 mM	-0.045	0.841	-0.523404	0.433404
		0.5 mM	-0.245	0.286	-0.723404	0.233404
		1.0 mM	0.0075	0.973	-0.470904	0.485904
	Note: * indicates the significance level of the mean difference was 0.05.
BCF (Hz)	Group	Mean value	Standard error
	0 mM	6.925	0.522247
	0.5 mM	7.6375	0.346154
	1.0 mM	6.9675	0.309526
	2.0 mM	7.35	0.434415
	multiple comparisons as following
	(I) group	(J) group	Mean difference (I-J)	significance (P value)	95% confidence interval
					Lower limit	Upper limit
	0 mM	0.5 mM	-0.7125	0.244	-1.98023	0.555232
		1.0 mM	-0.0425	0.943	-1.31023	1.22523
		2.0 mM	-0.425	0.479	-1.69273	0.842732
	0.5 mM	0 mM	0.7125	0.244	-0.555232	1.98023
		1.0 mM	0.67	0.272	-0.597732	1.93773
		2.0 mM	0.2875	0.63	-0.980232	1.55523
	1.0 mM	0 mM	0.0425	0.943	-1.22523	1.31023
		0.5 mM	-0.67	0.272	-1.93773	0.597732
		2.0 mM	-0.3825	0.523	-1.65023	0.885232
	2.0 mM	0 mM	0.425	0.479	-0.842732	1.69273
		0.5 mM	-0.2875	0.63	-1.55523	0.980232
		1.0 mM	0.3825	0.523	-0.885232	1.65023
	Note: * indicates the significance level of the mean difference was 0.05.
PMI (%)	Group	Mean value	Standard error
	0 mM	37.6214	1.08592
	0.5 mM	48.7992	2.55882
	1.0 mM	41.8074	1.21608
	2.0 mM	39.647	2.30174
	multiple comparisons as following
	(I) group	(J) group	Mean difference (I-J)	significance (P value)	95% confidence interval
					Lower limit	Upper limit
	0 mM	0.5 mM	-11.17780598*	0.001	-17.0452	-5.31044
		1.0 mM	-4.18596	0.146	-10.0533	1.68141
		2.0 mM	-2.02561	0.466	-7.89298	3.84176
	0.5 mM	0 mM	11.17780598*	0.001	5.31044	17.0452
		1.0 mM	6.99184673*	0.023	1.12448	12.8592
		2.0 mM	9.15219874*	0.005	3.28483	15.0196
	1.0 mM	0 mM	4.18596	0.146	-1.68141	10.0533
		0.5 mM	-6.99184673*	0.023	-12.8592	-1.12448
		2.0 mM	2.16035	0.438	-3.70702	8.02772
	2.0 mM	0 mM	2.02561	0.466	-3.84176	7.89298
		0.5 mM	-9.15219874*	0.005	-15.0196	-3.28483
		1.0 mM	-2.16035	0.438	-8.02772	3.70702
	Note: * indicates the significance level of the mean difference was 0.05.
ACRI (%)	Group	Mean value	Standard error
	0 mM	39.775	1.08886
	0.5 mM	49.925	2.92842
	1.0 mM	41.275	4.157
	2.0 mM	40.35	2.45034
	multiple comparisons as following
	(I) group	(J) group	Mean difference (I-J)	significance (P value)	95% confidence interval
					Lower limit	Upper limit
	0 mM	0.5 mM	-10.150000*	0.028	-19.0066	-1.29345
		1.0 mM	-1.5	0.719	-10.3566	7.35655
		2.0 mM	-0.575	0.89	-9.43155	8.28155
	0.5 mM	0 mM	10.150000*	0.028	1.29345	19.0066
		1.0 mM	8.65	0.055	-0.20655	17.5066
		2.0 mM	9.575000*	0.036	0.71845	18.4316
	1.0 mM	0 mM	1.5	0.719	-7.35655	10.3566
		0.5 mM	-8.65	0.055	-17.5066	0.20655
		2.0 mM	0.925	0.824	-7.93155	9.78155
	2.0 mM	0 mM	0.575	0.89	-8.28155	9.43155
		0.5 mM	-9.575000*	0.036	-18.4316	-0.71845
		1.0 mM	-0.925	0.824	-9.78155	7.93155
	Note: * indicates the significance level of the mean difference was 0.05.
ROS (%)	Group	Mean value	Standard error
	0 mM	41.7	2.99249
	0.5 mM	33.525	2.98227
	1.0 mM	37.575	1.73704
	2.0 mM	39.375	2.10372
	multiple comparisons as following
	(I) group	(J) group	Mean difference (I-J)	significance (P value)	95% confidence interval
					Lower limit	Upper limit
	0 mM	0.5 mM	8.175000*	0.04	0.4269	15.9231
		1.0 mM	4.125	0.269	-3.6231	11.8731
		2.0 mM	2.325	0.526	-5.4231	10.0731
	0.5 mM	0 mM	-8.175000*	0.04	-15.9231	-0.4269
		1.0 mM	-4.05	0.277	-11.7981	3.6981
		2.0 mM	-5.85	0.126	-13.5981	1.8981
	1.0 mM	0 mM	-4.125	0.269	-11.8731	3.6231
		0.5 mM	4.05	0.277	-3.6981	11.7981
		2.0 mM	-1.8	0.622	-9.5481	5.9481
	2.0 mM	0 mM	-2.325	0.526	-10.0731	5.4231
		0.5 mM	5.85	0.126	-1.8981	13.5981
		1.0 mM	1.8	0.622	-5.9481	9.5481
	Note: * indicates the significance level of the mean difference was 0.05.
